# Supplementary material
Source: HighWire-hosted journal article supplement (doi:10.1101/rna.080091.124)
Supplement: SupplementalTables.xlsx [file SupplementalTables.xlsx]

## Sheet: Title Page
Identification of leader-trailer helices of precursor ribosomal RNA in all phyla of bacteria and archaea
Bryan T. Gemler, Benjamin R. Warner, Ralf Bundschuh, Kurt Fredrick
Tab explanations:
The "16S species" and "23S species" tabs contain the number of rRNA LTs and their total unique number of clusters in the covariation method.
The "16S LTs" and "23S LTs" tabs contain metrics from every LT for both the shuffling and covariation methods.
How to access covariation method consensus structures:
Covariation method consensus structures are available at the below DOI
10.5281/zenodo.11051088
Each LT's consensus structure ID can be obtained from Row I in the LT tabs. Simply search for the consensus structure ID in the corresponding rRNA folder.
Species tab column definitions:
Column Name	Description
Domain	Taxonomic domain of the genome
Phylum	Taxonomic phylum of the genome
Class	Taxonomic class of the genome
Order	Taxonomic order of the genome
Family	Taxonomic family of the genome
Genus	Taxonomic genus of the genome
Species	Taxonomic species of the genome
Genome Accession	NCBI genome accession
Number of LTs	Total number of rRNA LTs for the species
Number of LTs With Predicted LT Helix	Total number of rRNA LTs with a predicted stem in either the covariation or shuffling methods using default settings.
Number of LTs Without Predicted LT Helix	Total number of rRNA LTs without a predicted stem in either the covariation or shuffling methods using default settings.
Number of LTs with Enough nts for Covariation Method	Total number of rRNA LTs for the species that have enough up- and down- stream nucleotides for the covariation method
Number of Unique LT Clusters	Total number of unique LT clusters from the covariation method
LT tab column definitions:
Column Name	Description
Domain	Taxonomic domain of the genome
Species	Taxonomic species of the genome
Genome Accession	NCBI genome accession
Operon Number	Arbitrary operon number from Barrnap
Shuffling Method: Z Score	The z-score of the LT, computed by the shuffling method μ and σ from the biological and shuffled data
Shuffling Method: μ Biological	Mean number of sliding windows from the 100 biological LT structures
Shuffling Method: μ Shuffled	Mean of the mean number of sliding windows from the 100 shuffled LT structures for the 100 shuffled sequences
Shuffling Method: σ Shuffled	Standard deviation of the mean number of sliding windows from the 100 shuffled LT structures for the 100 shuffled sequences
Covariation Method: Structure Cluster ID	The identity of the covariation method structure associated with the LT
Covariation Method: LT Covariation	The fraction of LT base pairs that contain some level of covariation (e.g., are not shaded red) in the covariation structure
Covariation Method: Number of Sliding Windows	The number of sliding windows in the covariation structure

## Sheet: 16S species
Domain	Phylum	Class	Order	Family	Genus	Species	Genome Accession	Number of LTs	Number of LTs With Predicted LT Helix	Number of LTs Without Predicted LT Helix	Number of LTs with Enough nts for Covariation Method	Number of Unique LT Clusters
d__bacteria	p__proteobacteria	c__alphaproteobacteria	o__sphingomonadales	f__sphingomonadaceae	g__zymomonas	s__Zymomonas pomaceae	GCF_000218875.1	3	3	0	3	1
d__bacteria	p__proteobacteria	c__alphaproteobacteria	o__sphingomonadales	f__sphingomonadaceae	g__zymomonas	s__Zymomonas mobilis	GCF_000175255.2	2	2	0	2	1
d__bacteria	p__proteobacteria	c__gammaproteobacteria	o__pseudomonadales	f__halomonadaceae	g__zymobacter	s__Zymobacter palmae	GCF_003610015.1	8	8	0	8	1
d__bacteria	p__bacteroidota	c__bacteroidia	o__flavobacteriales	f__flavobacteriaceae	g__zunongwangia	s__Zunongwangia profunda	GCF_000023465.1	3	3	0	3	1
d__bacteria	p__bacteroidota	c__bacteroidia	o__flavobacteriales	f__flavobacteriaceae	g__zobellia	s__Zobellia galactanivorans	GCF_000973105.1	2	2	0	2	1
d__bacteria	p__actinobacteriota	c__actinomycetia	o__actinomycetales	f__microbacteriaceae	g__zj450	s__ZJ450 sp011751885	GCF_011751885.2	2	2	0	2	1
d__bacteria	p__actinobacteriota	c__actinomycetia	o__actinomycetales	f__microbacteriaceae	g__zj450	s__ZJ450 sp009755725	GCF_009755725.1	2	2	0	2	1
d__bacteria	p__actinobacteriota	c__actinomycetia	o__actinomycetales	f__actinomycetaceae	g__zj293	s__ZJ293 sp011751725	GCF_011751945.2	3	3	0	3	1
d__bacteria	p__proteobacteria	c__gammaproteobacteria	o__pseudomonadales	f__spongiibacteraceae	g__zhongshania	s__Zhongshania aliphaticivorans	GCF_001586255.1	3	3	0	3	1
d__bacteria	p__proteobacteria	c__alphaproteobacteria	o__rhizobiales	f__xanthobacteraceae	g__z2-yc6860	s__Z2-YC6860 sp001579845	GCF_001579845.1	1	0	1	1	1
d__bacteria	p__campylobacterota	c__campylobacteria	o__campylobacterales	f__nitratiruptoraceae	g__yy08-10	s__YY08-10 sp016629565	GCF_016629565.1	3	3	0	3	1
d__bacteria	p__campylobacterota	c__campylobacteria	o__campylobacterales	f__nitratiruptoraceae	g__yy08-10	s__YY08-10 sp000010325	GCF_000010325.1	3	3	0	3	1
d__bacteria	p__proteobacteria	c__alphaproteobacteria	o__rhizobiales	f__devosiaceae	g__youhaiella	s__Youhaiella tibetensis	GCF_008000755.1	2	2	0	2	1
d__bacteria	p__proteobacteria	c__alphaproteobacteria	o__rhodobacterales	f__rhodobacteraceae	g__yoonia	s__Yoonia vestfoldensis_B	GCF_002158905.1	2	2	0	2	1
d__bacteria	p__actinobacteriota	c__actinomycetia	o__actinomycetales	f__microbacteriaceae	g__yonghaparkia	s__Yonghaparkia sp012530535	GCA_012530535.1	2	2	0	2	1
d__bacteria	p__actinobacteriota	c__actinomycetia	o__actinomycetales	f__dermatophilaceae	g__yimella	s__Yimella sp014530045	GCF_017654605.1	2	2	0	2	1
d__bacteria	p__proteobacteria	c__gammaproteobacteria	o__enterobacterales	f__enterobacteriaceae	g__yersinia	s__Yersinia mollaretii	GCF_013282725.1	7	7	0	7	3
d__bacteria	p__proteobacteria	c__gammaproteobacteria	o__enterobacterales	f__enterobacteriaceae	g__yersinia	s__Yersinia intermedia	GCF_900635455.1	7	7	0	7	2
d__bacteria	p__proteobacteria	c__gammaproteobacteria	o__enterobacterales	f__enterobacteriaceae	g__yersinia	s__Yersinia hibernica	GCF_004124235.1	7	7	0	7	3
d__bacteria	p__proteobacteria	c__gammaproteobacteria	o__enterobacterales	f__enterobacteriaceae	g__yersinia	s__Yersinia enterocolitica	GCF_901472495.1	7	7	0	7	3
d__bacteria	p__proteobacteria	c__gammaproteobacteria	o__enterobacterales	f__enterobacteriaceae	g__yersinia	s__Yersinia canariae	GCF_009831415.1	7	7	0	7	2
d__bacteria	p__proteobacteria	c__gammaproteobacteria	o__enterobacterales	f__enterobacteriaceae	g__yersinia	s__Yersinia aleksiciae	GCF_001047675.1	7	7	0	7	3
d__bacteria	p__proteobacteria	c__gammaproteobacteria	o__burkholderiales	f__burkholderiaceae	g__xylophilus	s__Xylophilus rhododendri	GCF_009906855.1	3	3	0	3	1
d__bacteria	p__proteobacteria	c__gammaproteobacteria	o__xanthomonadales	f__xanthomonadaceae	g__xylella	s__Xylella taiwanensis	GCF_013177435.1	2	2	0	2	1
d__bacteria	p__proteobacteria	c__gammaproteobacteria	o__xanthomonadales	f__xanthomonadaceae	g__xylella	s__Xylella fastidiosa	GCF_011801475.1	2	2	0	2	1
d__bacteria	p__actinobacteriota	c__actinomycetia	o__actinomycetales	f__cellulomonadaceae	g__xylanimonas	s__Xylanimonas sp004135385	GCF_004135385.1	3	3	0	3	1
d__bacteria	p__actinobacteriota	c__actinomycetia	o__actinomycetales	f__cellulomonadaceae	g__xylanimonas	s__Xylanimonas cellulosilytica	GCF_000024965.1	3	3	0	3	1
d__bacteria	p__actinobacteriota	c__actinomycetia	o__actinomycetales	f__cellulomonadaceae	g__xylanimonas	s__Xylanimonas allomyrinae	GCF_004135345.1	3	3	0	3	1
d__bacteria	p__verrucomicrobiota	c__verrucomicrobiae	o__chthoniobacterales	f__xiphinematobacteraceae	g__xiphinematobacter	s__Xiphinematobacter sp001318295	GCF_001318295.1	1	1	0	1	1
d__bacteria	p__proteobacteria	c__gammaproteobacteria	o__enterobacterales	f__enterobacteriaceae	g__xenorhabdus	s__Xenorhabdus poinarii	GCF_000968175.1	7	7	0	7	2
d__bacteria	p__proteobacteria	c__gammaproteobacteria	o__enterobacterales	f__enterobacteriaceae	g__xenorhabdus	s__Xenorhabdus doucetiae	GCF_000968195.1	7	7	0	7	3
d__bacteria	p__proteobacteria	c__gammaproteobacteria	o__enterobacterales	f__enterobacteriaceae	g__xenorhabdus	s__Xenorhabdus bovienii_C	GCF_000027225.1	7	7	0	7	1
d__bacteria	p__proteobacteria	c__gammaproteobacteria	o__enterobacterales	f__enterobacteriaceae	g__xenorhabdus	s__Xenorhabdus bovienii	GCF_000973125.1	7	7	0	7	1
d__bacteria	p__proteobacteria	c__gammaproteobacteria	o__xanthomonadales	f__xanthomonadaceae	g__xanthomonas_a	s__Xanthomonas_A theicola	GCF_014236795.1	2	2	0	2	2
d__bacteria	p__proteobacteria	c__gammaproteobacteria	o__xanthomonadales	f__xanthomonadaceae	g__xanthomonas_a	s__Xanthomonas_A sp014236855	GCF_014236855.1	2	2	0	2	2
d__bacteria	p__proteobacteria	c__gammaproteobacteria	o__xanthomonadales	f__xanthomonadaceae	g__xanthomonas_a	s__Xanthomonas_A hyacinthi	GCF_009769165.1	2	2	0	2	2
d__bacteria	p__proteobacteria	c__gammaproteobacteria	o__xanthomonadales	f__xanthomonadaceae	g__xanthomonas	s__Xanthomonas vesicatoria	GCF_001908725.1	2	2	0	2	2
d__bacteria	p__proteobacteria	c__gammaproteobacteria	o__xanthomonadales	f__xanthomonadaceae	g__xanthomonas	s__Xanthomonas sp905142465	GCF_905142465.1	2	2	0	2	2
d__bacteria	p__proteobacteria	c__gammaproteobacteria	o__xanthomonadales	f__xanthomonadaceae	g__xanthomonas	s__Xanthomonas phaseoli	GCF_003999565.1	2	2	0	2	2
d__bacteria	p__proteobacteria	c__gammaproteobacteria	o__xanthomonadales	f__xanthomonadaceae	g__xanthomonas	s__Xanthomonas oryzae	GCF_004136375.1	2	2	0	2	2
d__bacteria	p__proteobacteria	c__gammaproteobacteria	o__xanthomonadales	f__xanthomonadaceae	g__xanthomonas	s__Xanthomonas fragariae_A	GCF_017603965.1	2	2	0	2	2
d__bacteria	p__proteobacteria	c__gammaproteobacteria	o__xanthomonadales	f__xanthomonadaceae	g__xanthomonas	s__Xanthomonas fragariae	GCF_900183975.1	2	2	0	2	2
d__bacteria	p__proteobacteria	c__gammaproteobacteria	o__xanthomonadales	f__xanthomonadaceae	g__xanthomonas	s__Xanthomonas campestris_C	GCF_012848175.1	2	2	0	2	2
d__bacteria	p__proteobacteria	c__gammaproteobacteria	o__xanthomonadales	f__xanthomonadaceae	g__xanthomonas	s__Xanthomonas campestris	GCF_000007145.1	2	2	0	2	2
d__bacteria	p__proteobacteria	c__alphaproteobacteria	o__rhizobiales	f__xanthobacteraceae	g__xanthobacter	s__Xanthobacter sp016807805	GCF_016807805.1	2	2	0	2	1
d__bacteria	p__actinobacteriota	c__actinomycetia	o__mycobacteriales	f__mycobacteriaceae	g__x156	s__X156 sp004006015	GCF_004006015.1	3	3	0	3	1
d__bacteria	p__actinobacteriota	c__actinomycetia	o__actinomycetales	f__microbacteriaceae	g__wsta01	s__WSTA01 sp018024495	GCF_018024495.1	2	2	0	2	1
d__bacteria	p__campylobacterota	c__campylobacteria	o__campylobacterales	f__helicobacteraceae	g__wolinella	s__Wolinella succinogenes	GCF_000196135.1	3	3	0	3	1
d__bacteria	p__proteobacteria	c__alphaproteobacteria	o__rickettsiales	f__anaplasmataceae	g__wolbachia	s__Wolbachia sp013365495	GCF_013365495.1	1	1	0	1	1
d__bacteria	p__proteobacteria	c__alphaproteobacteria	o__rickettsiales	f__anaplasmataceae	g__wolbachia	s__Wolbachia sp013365475	GCF_013365475.1	1	1	0	1	1
d__bacteria	p__proteobacteria	c__alphaproteobacteria	o__rickettsiales	f__anaplasmataceae	g__wolbachia	s__Wolbachia sp013365455	GCF_013365455.1	1	1	0	1	1
d__bacteria	p__proteobacteria	c__alphaproteobacteria	o__rickettsiales	f__anaplasmataceae	g__wolbachia	s__Wolbachia sp013365435	GCF_013365435.1	1	1	0	1	1
d__bacteria	p__proteobacteria	c__alphaproteobacteria	o__rickettsiales	f__anaplasmataceae	g__wolbachia	s__Wolbachia sp012277315	GCF_012277315.1	1	1	0	1	1
d__bacteria	p__proteobacteria	c__alphaproteobacteria	o__rickettsiales	f__anaplasmataceae	g__wolbachia	s__Wolbachia sp012277295	GCF_012277295.1	1	1	0	1	1
d__bacteria	p__proteobacteria	c__alphaproteobacteria	o__rickettsiales	f__anaplasmataceae	g__wolbachia	s__Wolbachia sp001931755	GCF_001931755.2	1	1	0	1	1
d__bacteria	p__proteobacteria	c__alphaproteobacteria	o__rickettsiales	f__anaplasmataceae	g__wolbachia	s__Wolbachia sp001439985	GCF_018141665.1	1	1	0	1	1
d__bacteria	p__proteobacteria	c__alphaproteobacteria	o__rickettsiales	f__anaplasmataceae	g__wolbachia	s__Wolbachia sp000829315	GCF_000829315.1	1	1	0	1	1
d__bacteria	p__proteobacteria	c__alphaproteobacteria	o__rickettsiales	f__anaplasmataceae	g__wolbachia	s__Wolbachia sp000376585	GCF_000376585.1	1	1	0	1	1
d__bacteria	p__proteobacteria	c__alphaproteobacteria	o__rickettsiales	f__anaplasmataceae	g__wolbachia	s__Wolbachia sp000306885	GCF_000306885.1	1	1	0	1	1
d__bacteria	p__proteobacteria	c__alphaproteobacteria	o__rickettsiales	f__anaplasmataceae	g__wolbachia	s__Wolbachia sp000008385	GCF_000008385.1	1	1	0	1	1
d__bacteria	p__proteobacteria	c__alphaproteobacteria	o__rickettsiales	f__anaplasmataceae	g__wolbachia	s__Wolbachia pipientis_C	GCF_004171285.1	1	1	0	1	1
d__bacteria	p__proteobacteria	c__alphaproteobacteria	o__rickettsiales	f__anaplasmataceae	g__wolbachia	s__Wolbachia pipientis	GCF_000008025.1	1	1	0	1	1
d__bacteria	p__proteobacteria	c__gammaproteobacteria	o__woeseiales	f__woeseiaceae	g__woeseia	s__Woeseia oceani	GCF_001677435.1	1	1	0	1	1
d__bacteria	p__bacteroidota	c__bacteroidia	o__flavobacteriales	f__flavobacteriaceae	g__wocania	s__Wocania sp009498295	GCF_009498295.1	4	4	0	4	1
d__bacteria	p__bacteroidota	c__bacteroidia	o__flavobacteriales	f__flavobacteriaceae	g__winogradskyella	s__Winogradskyella sp001971725	GCF_001971725.1	2	2	0	2	1
d__bacteria	p__bacteroidota	c__bacteroidia	o__flavobacteriales	f__flavobacteriaceae	g__winogradskyella	s__Winogradskyella sp000828715	GCF_000828715.1	2	2	0	2	1
d__bacteria	p__bacteroidota	c__bacteroidia	o__flavobacteriales	f__flavobacteriaceae	g__winogradskyella	s__Winogradskyella schleiferi	GCF_013394655.1	2	2	0	2	1
d__bacteria	p__bacteroidota	c__bacteroidia	o__flavobacteriales	f__flavobacteriaceae	g__winogradskyella	s__Winogradskyella forsetii	GCF_013394595.1	2	2	0	2	1
d__bacteria	p__firmicutes	c__bacilli	o__mycoplasmatales	f__mycoplasmataceae	g__williamsoniiplasma	s__Williamsoniiplasma somnilux	GCF_002804005.1	1	1	0	1	1
d__bacteria	p__firmicutes	c__bacilli	o__mycoplasmatales	f__mycoplasmataceae	g__williamsoniiplasma	s__Williamsoniiplasma luminosum	GCF_002803985.1	1	1	0	1	1
d__bacteria	p__firmicutes	c__bacilli	o__mycoplasmatales	f__mycoplasmataceae	g__williamsoniiplasma	s__Williamsoniiplasma freundtii	GCF_002804205.1	2	2	0	2	1
d__bacteria	p__proteobacteria	c__gammaproteobacteria	o__enterobacterales_a	f__enterobacteriaceae_a	g__wigglesworthia	s__Wigglesworthia glossinidia_B	GCF_000247565.1	2	2	0	2	1
d__bacteria	p__cyanobacteria	c__cyanobacteriia	o__pcc-6307	f__cyanobiaceae	g__wh-5701	s__WH-5701 sp015841355	GCF_015841355.1	2	2	0	2	1
d__bacteria	p__proteobacteria	c__gammaproteobacteria	o__xanthomonadales	f__wenzhouxiangellaceae	g__wenzhouxiangella	s__Wenzhouxiangella sp014725735	GCF_014725735.1	1	1	0	1	1
d__bacteria	p__proteobacteria	c__gammaproteobacteria	o__xanthomonadales	f__wenzhouxiangellaceae	g__wenzhouxiangella	s__Wenzhouxiangella marina	GCF_001187785.1	1	1	0	1	1
d__bacteria	p__bacteroidota	c__bacteroidia	o__flavobacteriales	f__flavobacteriaceae	g__wenyingzhuangia	s__Wenyingzhuangia fucanilytica	GCF_001697185.1	4	4	0	4	1
d__bacteria	p__firmicutes	c__bacilli	o__bacillales_b	f__bacillaceae_c	g__weizmannia	s__Weizmannia coagulans_A	GCF_000169195.2	10	10	0	10	3
d__bacteria	p__firmicutes	c__bacilli	o__lactobacillales	f__lactobacillaceae	g__weissella_a	s__Weissella_A cryptocerci	GCF_004358325.1	6	6	0	6	2
d__bacteria	p__firmicutes	c__bacilli	o__lactobacillales	f__lactobacillaceae	g__weissella	s__Weissella soli	GCF_001761545.1	6	6	0	6	2
d__bacteria	p__firmicutes	c__bacilli	o__lactobacillales	f__lactobacillaceae	g__weissella	s__Weissella hellenica_B	GCF_006777025.1	8	8	0	8	3
d__bacteria	p__firmicutes	c__bacilli	o__lactobacillales	f__lactobacillaceae	g__weissella	s__Weissella diestrammenae	GCF_014397255.1	5	5	0	5	2
d__bacteria	p__firmicutes	c__bacilli	o__lactobacillales	f__lactobacillaceae	g__weissella	s__Weissella confusa_B	GCF_004771295.1	9	9	0	9	6
d__bacteria	p__firmicutes	c__bacilli	o__lactobacillales	f__lactobacillaceae	g__weissella	s__Weissella coleopterorum	GCF_011304355.1	5	5	0	5	1
d__bacteria	p__firmicutes	c__bacilli	o__lactobacillales	f__lactobacillaceae	g__weissella	s__Weissella ceti_A	GCF_000750535.1	6	6	0	6	6
d__bacteria	p__bacteroidota	c__bacteroidia	o__flavobacteriales	f__weeksellaceae	g__weeksella	s__Weeksella virosa	GCF_000189415.1	5	5	0	5	1
d__bacteria	p__bacteroidota	c__bacteroidia	o__flavobacteriales	f__blattabacteriaceae	g__walczuchella	s__Walczuchella monophlebidarum	GCF_000709555.1	1	1	0	1	1
d__bacteria	p__chlamydiota	c__chlamydiia	o__chlamydiales	f__waddliaceae	g__waddlia	s__Waddlia chondrophila	GCF_000092785.1	2	2	0	2	1
d__bacteria	p__myxococcota	c__myxococcia	o__myxococcales	f__vulgatibacteraceae	g__vulgatibacter	s__Vulgatibacter incomptus	GCF_001263175.1	3	3	0	3	1
d__bacteria	p__cyanobacteria	c__cyanobacteriia	o__pcc-6307	f__cyanobiaceae	g__vulcanococcus	s__Vulcanococcus sp014217875	GCF_014217875.1	3	3	0	3	1
d__bacteria	p__cyanobacteria	c__cyanobacteriia	o__pcc-6307	f__cyanobiaceae	g__vulcanococcus	s__Vulcanococcus sp000179235	GCF_000179235.2	3	3	0	3	1
d__archaea	p__thermoproteota	c__thermoproteia	o__thermoproteales	f__thermocladiaceae	g__vulcanisaeta	s__Vulcanisaeta moutnovskia	GCF_000190315.1	1	1	0	1	1
d__archaea	p__thermoproteota	c__thermoproteia	o__thermoproteales	f__thermocladiaceae	g__vulcanisaeta	s__Vulcanisaeta distributa	GCF_000148385.1	1	1	0	1	1
d__bacteria	p__actinobacteriota	c__actinomycetia	o__streptosporangiales	f__streptosporangiaceae	g__vn6-2	s__VN6-2 sp018437505	GCA_018437505.1	3	2	1	2	1
d__bacteria	p__firmicutes	c__bacilli	o__bacillales_d	f__amphibacillaceae	g__virgibacillus_f	s__Virgibacillus_F phasianinus	GCF_002216775.1	7	7	0	7	1
d__bacteria	p__firmicutes	c__bacilli	o__bacillales_d	f__amphibacillaceae	g__virgibacillus_f	s__Virgibacillus_F necropolis	GCF_002224365.1	7	7	0	7	2
d__bacteria	p__firmicutes	c__bacilli	o__bacillales_d	f__amphibacillaceae	g__virgibacillus	s__Virgibacillus sp000725285	GCF_000725285.1	7	7	0	7	4
d__bacteria	p__firmicutes	c__bacilli	o__bacillales_d	f__amphibacillaceae	g__virgibacillus	s__Virgibacillus pantothenticus	GCF_018075365.1	6	5	1	6	2
d__bacteria	p__proteobacteria	c__gammaproteobacteria	o__enterobacterales	f__vibrionaceae	g__vibrio	s__Vibrio ziniensis	GCF_011064285.1	10	10	0	10	3
d__bacteria	p__proteobacteria	c__gammaproteobacteria	o__enterobacterales	f__vibrionaceae	g__vibrio	s__Vibrio zhugei	GCF_003716875.1	9	9	0	9	3
d__bacteria	p__proteobacteria	c__gammaproteobacteria	o__enterobacterales	f__vibrionaceae	g__vibrio	s__Vibrio vulnificus	GCF_002224265.1	11	11	0	11	5
d__bacteria	p__proteobacteria	c__gammaproteobacteria	o__enterobacterales	f__vibrionaceae	g__vibrio	s__Vibrio tubiashii	GCF_000772105.1	10	10	0	10	3
d__bacteria	p__proteobacteria	c__gammaproteobacteria	o__enterobacterales	f__vibrionaceae	g__vibrio	s__Vibrio tritonius	GCF_001547935.1	11	11	0	11	3
d__bacteria	p__proteobacteria	c__gammaproteobacteria	o__enterobacterales	f__vibrionaceae	g__vibrio	s__Vibrio tapetis	GCF_900233005.1	5	5	0	5	4
d__bacteria	p__proteobacteria	c__gammaproteobacteria	o__enterobacterales	f__vibrionaceae	g__vibrio	s__Vibrio taketomensis	GCF_009938165.1	12	12	0	12	4
d__bacteria	p__proteobacteria	c__gammaproteobacteria	o__enterobacterales	f__vibrionaceae	g__vibrio	s__Vibrio sp903986855	GCF_905175385.1	12	12	0	12	4
d__bacteria	p__proteobacteria	c__gammaproteobacteria	o__enterobacterales	f__vibrionaceae	g__vibrio	s__Vibrio sp011306175	GCF_011306175.1	8	8	0	8	2
d__bacteria	p__proteobacteria	c__gammaproteobacteria	o__enterobacterales	f__vibrionaceae	g__vibrio	s__Vibrio sp009601765	GCF_009601765.2	9	9	0	9	3
d__bacteria	p__proteobacteria	c__gammaproteobacteria	o__enterobacterales	f__vibrionaceae	g__vibrio	s__Vibrio sp004804295	GCF_019226825.1	12	12	0	12	4
d__bacteria	p__proteobacteria	c__gammaproteobacteria	o__enterobacterales	f__vibrionaceae	g__vibrio	s__Vibrio sp000176715	GCF_019048845.1	9	9	0	9	4
d__bacteria	p__proteobacteria	c__gammaproteobacteria	o__enterobacterales	f__vibrionaceae	g__vibrio	s__Vibrio rumoiensis	GCF_002218045.2	8	8	0	8	2
d__bacteria	p__proteobacteria	c__gammaproteobacteria	o__enterobacterales	f__vibrionaceae	g__vibrio	s__Vibrio ponticus	GCF_009938225.1	6	6	0	6	4
d__bacteria	p__proteobacteria	c__gammaproteobacteria	o__enterobacterales	f__vibrionaceae	g__vibrio	s__Vibrio panuliri	GCF_009938205.1	11	11	0	11	4
d__bacteria	p__proteobacteria	c__gammaproteobacteria	o__enterobacterales	f__vibrionaceae	g__vibrio	s__Vibrio metoecus_B	GCF_009665255.1	10	10	0	10	4
d__bacteria	p__proteobacteria	c__gammaproteobacteria	o__enterobacterales	f__vibrionaceae	g__vibrio	s__Vibrio hyugaensis	GCF_002906655.1	11	11	0	11	6
d__bacteria	p__proteobacteria	c__gammaproteobacteria	o__enterobacterales	f__vibrionaceae	g__vibrio	s__Vibrio gazogenes_A	GCF_002196515.1	8	8	0	8	4
d__bacteria	p__proteobacteria	c__gammaproteobacteria	o__enterobacterales	f__vibrionaceae	g__vibrio	s__Vibrio cyclitrophicus	GCF_005144905.1	14	14	0	14	6
d__bacteria	p__proteobacteria	c__gammaproteobacteria	o__enterobacterales	f__vibrionaceae	g__vibrio	s__Vibrio cidicii	GCF_009763805.1	11	11	0	11	3
d__bacteria	p__proteobacteria	c__gammaproteobacteria	o__enterobacterales	f__vibrionaceae	g__vibrio	s__Vibrio casei	GCF_002218025.2	8	8	0	8	3
d__bacteria	p__proteobacteria	c__gammaproteobacteria	o__enterobacterales	f__vibrionaceae	g__vibrio	s__Vibrio campbellii	GCF_002163755.1	12	12	0	12	7
d__bacteria	p__proteobacteria	c__gammaproteobacteria	o__enterobacterales	f__vibrionaceae	g__vibrio	s__Vibrio breoganii	GCF_001677275.1	9	9	0	9	2
d__bacteria	p__proteobacteria	c__gammaproteobacteria	o__enterobacterales	f__vibrionaceae	g__vibrio	s__Vibrio bathopelagicus	GCF_014879975.1	15	15	0	15	6
d__bacteria	p__proteobacteria	c__gammaproteobacteria	o__enterobacterales	f__vibrionaceae	g__vibrio	s__Vibrio astriarenae	GCF_010587385.1	11	11	0	11	3
d__bacteria	p__proteobacteria	c__gammaproteobacteria	o__enterobacterales	f__vibrionaceae	g__vibrio	s__Vibrio aquimaris	GCF_009363415.1	9	9	0	9	2
d__bacteria	p__proteobacteria	c__gammaproteobacteria	o__enterobacterales	f__vibrionaceae	g__vibrio	s__Vibrio aphrogenes	GCF_002157735.2	7	7	0	7	3
d__bacteria	p__proteobacteria	c__gammaproteobacteria	o__enterobacterales	f__vibrionaceae	g__vibrio	s__Vibrio alginolyticus	GCF_000354175.2	11	11	0	11	6
d__bacteria	p__proteobacteria	c__gammaproteobacteria	o__enterobacterales	f__vibrionaceae	g__vibrio	s__Vibrio alfacsensis	GCF_003544875.1	11	11	0	11	3
d__bacteria	p__proteobacteria	c__gammaproteobacteria	o__ps1	f__thioglobaceae	g__vesicomyosocius	s__Vesicomyosocius sp014706615	GCF_014706615.1	1	1	0	1	1
d__bacteria	p__proteobacteria	c__gammaproteobacteria	o__ps1	f__thioglobaceae	g__vesicomyosocius	s__Vesicomyosocius okutanii	GCF_000010405.1	1	1	0	1	1
d__bacteria	p__firmicutes_c	c__negativicutes	o__veillonellales	f__veillonellaceae	g__veillonella	s__Veillonella rodentium	GCF_900187285.1	4	4	0	4	2
d__bacteria	p__firmicutes_c	c__negativicutes	o__veillonellales	f__veillonellaceae	g__veillonella	s__Veillonella parvula_A	GCF_902810435.1	4	4	0	4	3
d__bacteria	p__firmicutes_c	c__negativicutes	o__veillonellales	f__veillonellaceae	g__veillonella	s__Veillonella parvula	GCF_000024945.1	4	4	0	4	3
d__bacteria	p__firmicutes_c	c__negativicutes	o__veillonellales	f__veillonellaceae	g__veillonella	s__Veillonella nakazawae	GCF_013393365.1	4	4	0	4	3
d__bacteria	p__firmicutes_c	c__negativicutes	o__veillonellales	f__veillonellaceae	g__veillonella	s__Veillonella dispar	GCF_900637515.1	4	4	0	4	3
d__bacteria	p__proteobacteria	c__gammaproteobacteria	o__burkholderiales	f__burkholderiaceae	g__variovorax	s__Variovorax sp901827205	GCF_901827205.1	2	2	0	2	1
d__bacteria	p__proteobacteria	c__gammaproteobacteria	o__burkholderiales	f__burkholderiaceae	g__variovorax	s__Variovorax sp901827185	GCF_901827185.1	2	2	0	2	1
d__bacteria	p__proteobacteria	c__gammaproteobacteria	o__burkholderiales	f__burkholderiaceae	g__variovorax	s__Variovorax sp901827175	GCF_901827175.1	2	2	0	2	1
d__bacteria	p__proteobacteria	c__gammaproteobacteria	o__burkholderiales	f__burkholderiaceae	g__variovorax	s__Variovorax sp901827155	GCF_901827155.1	2	2	0	2	1
d__bacteria	p__proteobacteria	c__gammaproteobacteria	o__burkholderiales	f__burkholderiaceae	g__variovorax	s__Variovorax sp017161115	GCF_017161115.1	2	2	0	2	1
d__bacteria	p__proteobacteria	c__gammaproteobacteria	o__burkholderiales	f__burkholderiaceae	g__variovorax	s__Variovorax sp014303735	GCF_014303735.1	2	2	0	2	1
d__bacteria	p__proteobacteria	c__gammaproteobacteria	o__burkholderiales	f__burkholderiaceae	g__variovorax	s__Variovorax sp014302995	GCF_014302995.1	2	2	0	2	1
d__bacteria	p__proteobacteria	c__gammaproteobacteria	o__burkholderiales	f__burkholderiaceae	g__variovorax	s__Variovorax sp003019815	GCF_003019815.1	3	3	0	3	1
d__bacteria	p__proteobacteria	c__gammaproteobacteria	o__burkholderiales	f__burkholderiaceae	g__variovorax	s__Variovorax sp001577265	GCF_001577265.1	2	2	0	2	1
d__bacteria	p__proteobacteria	c__gammaproteobacteria	o__burkholderiales	f__burkholderiaceae	g__variovorax	s__Variovorax paradoxus_H	GCF_009498455.1	2	2	0	2	1
d__bacteria	p__proteobacteria	c__gammaproteobacteria	o__burkholderiales	f__burkholderiaceae	g__variovorax	s__Variovorax paradoxus_G	GCF_009755665.1	2	2	0	2	1
d__bacteria	p__proteobacteria	c__gammaproteobacteria	o__burkholderiales	f__burkholderiaceae	g__variovorax	s__Variovorax paradoxus_E	GCF_000463015.1	2	2	0	2	2
d__bacteria	p__proteobacteria	c__gammaproteobacteria	o__burkholderiales	f__burkholderiaceae	g__variovorax	s__Variovorax paradoxus_C	GCF_000184745.1	2	2	0	2	1
d__bacteria	p__proteobacteria	c__alphaproteobacteria	o__rhizobiales	f__xanthobacteraceae	g__variibacter	s__Variibacter gotjawalensis	GCF_002355335.1	1	1	0	1	1
d__bacteria	p__proteobacteria	c__alphaproteobacteria	o__rhodobacterales	f__rhodobacteraceae	g__vannielia	s__Vannielia sp006351965	GCF_006351965.1	1	1	0	1	1
d__bacteria	p__omnitrophota	c__koll11	o__uba1572		g__vampirococcus_b	s__Vampirococcus_B archaeovorus	GCF_004102945.1	1	0	1	0	0
d__bacteria	p__firmicutes_a	c__clostridia	o__lachnospirales	f__vallitaleaceae	g__vallitalea	s__Vallitalea pronyensis	GCF_018141445.1	6	6	0	6	2
d__bacteria	p__firmicutes_a	c__clostridia	o__lachnospirales	f__vallitaleaceae	g__vallitalea	s__Vallitalea guaymasensis	GCF_018141425.1	6	6	0	6	3
d__bacteria	p__firmicutes	c__bacilli	o__lactobacillales	f__vagococcaceae	g__vagococcus_d	s__Vagococcus_D coleopterorum	GCF_011303955.1	5	5	0	5	1
d__bacteria	p__firmicutes	c__bacilli	o__lactobacillales	f__vagococcaceae	g__vagococcus_a	s__Vagococcus_A zengguangii	GCF_005145005.1	7	7	0	7	2
d__bacteria	p__firmicutes	c__bacilli	o__lactobacillales	f__vagococcaceae	g__vagococcus_a	s__Vagococcus_A sp004792515	GCF_004792515.1	7	7	0	7	2
d__bacteria	p__firmicutes	c__bacilli	o__lactobacillales	f__vagococcaceae	g__vagococcus	s__Vagococcus teuberi	GCF_001870205.1	6	6	0	6	2
d__bacteria	p__firmicutes	c__bacilli	o__lactobacillales	f__vagococcaceae	g__vagococcus	s__Vagococcus penaei	GCF_001998885.1	5	5	0	5	2
d__bacteria	p__firmicutes	c__bacilli	o__lactobacillales	f__vagococcaceae	g__vagococcus	s__Vagococcus hydrophili	GCF_011304195.1	8	8	0	8	3
d__bacteria	p__firmicutes	c__bacilli	o__lactobacillales	f__vagococcaceae	g__vagococcus	s__Vagococcus carniphilus	GCF_014397115.1	7	7	0	7	2
d__bacteria	p__myxococcota	c__bradymonadia	o__bradymonadales	f__bradymonadaceae	g__v1718	s__V1718 sp007993755	GCA_007993755.1	3	3	0	0	0
d__bacteria	p__proteobacteria	c__gammaproteobacteria	o__burkholderiales	f__usitatibacteraceae	g__usitatibacter	s__Usitatibacter rugosus	GCF_013003965.1	2	2	0	2	1
d__bacteria	p__proteobacteria	c__gammaproteobacteria	o__burkholderiales	f__usitatibacteraceae	g__usitatibacter	s__Usitatibacter palustris	GCF_013003985.1	2	2	0	2	1
d__bacteria	p__firmicutes	c__bacilli	o__bacillales_a	f__planococcaceae	g__ureibacillus	s__Ureibacillus sp005491425	GCF_005491425.1	13	13	0	13	3
d__bacteria	p__bacteroidota	c__bacteroidia	o__flavobacteriales	f__flavobacteriaceae	g__urechidicola	s__Urechidicola croceus	GCF_001761325.1	2	2	0	2	1
d__bacteria	p__firmicutes	c__bacilli	o__mycoplasmatales	f__mycoplasmoidaceae	g__ureaplasma	s__Ureaplasma parvum	GCF_000019345.1	2	2	0	2	1
d__bacteria	p__planctomycetota	c__planctomycetia	o__gemmatales	f__gemmataceae	g__urbifossiella	s__Urbifossiella limnaea	GCF_007747215.1	2	2	0	2	1
d__bacteria	p__proteobacteria	c__gammaproteobacteria	o__burkholderiales	f__burkholderiaceae	g__undibacterium	s__Undibacterium sp009937975	GCF_009937975.1	4	4	0	4	1
d__bacteria	p__proteobacteria	c__gammaproteobacteria	o__burkholderiales	f__burkholderiaceae	g__undibacterium	s__Undibacterium sp009937955	GCF_009937955.1	4	4	0	4	1
d__bacteria	p__proteobacteria	c__gammaproteobacteria	o__burkholderiales	f__burkholderiaceae	g__undibacterium	s__Undibacterium parvum	GCF_003955735.1	6	6	0	6	1
d__bacteria	p__actinobacteriota	c__actinomycetia	o__actinomycetales	f__actinomycetaceae	g__umgs822	s__UMGS822 sp015240065	GCF_015240065.1	3	3	0	3	1
d__bacteria	p__actinobacteriota	c__coriobacteriia	o__coriobacteriales	f__atopobiaceae	g__uba7748	s__UBA7748 sp003862175	GCF_018128285.1	3	3	0	3	1
d__bacteria	p__proteobacteria	c__gammaproteobacteria	o__enterobacterales	f__enterobacteriaceae	g__uba7405	s__UBA7405 sp000755535	GCF_017348915.1	7	7	0	7	2
d__archaea	p__methanobacteriota	c__methanobacteria	o__methanobacteriales	f__methanobacteriaceae	g__uba588	s__UBA588 sp002509085	GCF_018141185.1	2	2	0	2	2
d__bacteria	p__verrucomicrobiota	c__kiritimatiellae	o__kiritimatiellales	f__pontiellaceae	g__uba5540	s__UBA5540 sp009905215	GCA_009905215.1	2	2	0	0	0
d__bacteria	p__acidobacteriota	c__acidobacteriae	o__acidobacteriales	f__acidobacteriaceae	g__uba5172	s__UBA5172 sp014083945	GCF_014083945.1	1	1	0	1	1
d__bacteria	p__firmicutes_a	c__clostridia	o__clostridiales	f__clostridiaceae	g__uba3947	s__UBA3947 sp006351925	GCF_006351925.1	11	11	0	11	2
d__bacteria	p__proteobacteria	c__gammaproteobacteria	o__pseudomonadales	f__dsm-6294	g__uba2009	s__UBA2009 sp016132445	GCA_016132445.1	3	3	0	3	2
d__bacteria	p__proteobacteria	c__alphaproteobacteria	o__sphingomonadales	f__sphingomonadaceae	g__uba1936	s__UBA1936 sp003660165	GCF_003660165.1	2	2	0	2	1
d__bacteria	p__firmicutes_a	c__clostridia	o__tissierellales	f__sedimentibacteraceae	g__uba1535	s__UBA1535 sp017352195	GCF_017352195.1	10	0	10	10	2
d__bacteria	p__proteobacteria	c__gammaproteobacteria	o__burkholderiales	f__uba11063		s__UBA11063 sp002892535	GCA_002892535.1	4	4	0	4	1
d__bacteria	p__planctomycetota	c__planctomycetia	o__gemmatales	f__gemmataceae	g__tuwongella	s__Tuwongella immobilis	GCF_901538355.1	4	4	0	4	1
d__bacteria	p__spirochaetota	c__leptospirae	o__turneriellales	f__turneriellaceae	g__turneriella	s__Turneriella parva	GCF_000266885.1	2	2	0	2	1
d__bacteria	p__firmicutes	c__bacilli	o__haloplasmatales_a	f__turicibacteraceae	g__turicibacter	s__Turicibacter sp001543345	GCF_001543345.1	12	12	0	12	2
d__bacteria	p__firmicutes	c__bacilli	o__haloplasmatales_a	f__turicibacteraceae	g__turicibacter	s__Turicibacter sanguinis	GCF_013046825.1	8	8	0	8	2
d__bacteria	p__firmicutes	c__bacilli	o__tumebacillales	f__tumebacillaceae	g__tumebacillus_a	s__Tumebacillus_A avium	GCF_002162355.1	37	37	0	37	6
d__bacteria	p__firmicutes	c__bacilli	o__tumebacillales	f__tumebacillaceae	g__tumebacillus_a	s__Tumebacillus_A algifaecis	GCF_002243515.1	27	27	0	27	1
d__bacteria	p__firmicutes	c__bacilli	o__mycoplasmatales	f__mycoplasmataceae	g__tullyiplasma	s__Tullyiplasma syrphidae	GCF_002843565.1	2	2	0	2	1
d__bacteria	p__proteobacteria	c__alphaproteobacteria	o__sphingomonadales	f__sphingomonadaceae	g__tsuneonella	s__Tsuneonella mangrovi	GCF_002269345.1	1	1	0	1	1
d__bacteria	p__proteobacteria	c__alphaproteobacteria	o__sphingomonadales	f__sphingomonadaceae	g__tsuneonella	s__Tsuneonella dongtanensis	GCF_001698205.1	1	1	0	1	1
d__bacteria	p__actinobacteriota	c__actinomycetia	o__mycobacteriales	f__mycobacteriaceae	g__tsukamurella	s__Tsukamurella paurometabola_A	GCF_900631615.1	2	2	0	2	1
d__bacteria	p__actinobacteriota	c__actinomycetia	o__mycobacteriales	f__mycobacteriaceae	g__tsukamurella	s__Tsukamurella paurometabola	GCF_000092225.1	2	2	0	2	1
d__bacteria	p__actinobacteriota	c__actinomycetia	o__actinomycetales	f__actinomycetaceae	g__trueperella	s__Trueperella pecoris	GCF_014926385.1	4	4	0	4	1
d__bacteria	p__actinobacteriota	c__actinomycetia	o__actinomycetales	f__actinomycetaceae	g__trueperella	s__Trueperella bialowiezensis	GCF_900637955.1	2	2	0	2	1
d__bacteria	p__deinococcota	c__deinococci	o__deinococcales	f__trueperaceae	g__truepera	s__Truepera radiovictrix	GCF_000092425.1	2	2	0	2	2
d__bacteria	p__actinobacteriota	c__actinomycetia	o__actinomycetales	f__microbacteriaceae	g__tropheryma	s__Tropheryma whipplei	GCF_000007485.1	1	1	0	1	1
d__bacteria	p__proteobacteria	c__gammaproteobacteria	o__burkholderiales	f__burkholderiaceae	g__trinickia	s__Trinickia sp005280735	GCF_005280735.1	4	4	0	4	4
d__bacteria	p__cyanobacteria	c__cyanobacteriia	o__cyanobacteriales	f__nostocaceae	g__trichormus_b	s__Trichormus_B azollae	GCF_000196515.1	4	4	0	4	2
d__bacteria	p__cyanobacteria	c__cyanobacteriia	o__cyanobacteriales	f__nostocaceae	g__trichormus	s__Trichormus variabilis	GCF_009856605.1	4	4	0	4	2
d__bacteria	p__cyanobacteria	c__cyanobacteriia	o__cyanobacteriales	f__nostocaceae	g__trichormus	s__Trichormus sp013393945	GCF_013393945.1	4	4	0	4	2
d__bacteria	p__cyanobacteria	c__cyanobacteriia	o__cyanobacteriales	f__nostocaceae	g__trichormus	s__Trichormus sp002896875	GCF_002896875.1	5	5	0	5	2
d__bacteria	p__cyanobacteria	c__cyanobacteriia	o__cyanobacteriales	f__nostocaceae	g__trichormus	s__Trichormus sp001548375	GCF_001548375.1	4	4	0	3	2
d__bacteria	p__cyanobacteria	c__cyanobacteriia	o__cyanobacteriales	f__nostocaceae	g__trichormus	s__Trichormus sp000316645	GCF_000316645.1	5	5	0	5	2
d__bacteria	p__cyanobacteria	c__cyanobacteriia	o__cyanobacteriales	f__nostocaceae	g__trichormus	s__Trichormus sp000009705	GCF_000009705.1	4	4	0	4	2
d__bacteria	p__desulfobacterota	c__desulfuromonadia	o__geobacterales	f__pseudopelobacteraceae	g__trichlorobacter	s__Trichlorobacter lovleyi	GCF_000020385.1	2	2	0	2	1
d__bacteria	p__spirochaetota	c__spirochaetia	o__treponematales	f__termitinemataceae	g__treponema_h	s__Treponema_H azotonutricium	GCF_000214355.1	2	2	0	2	1
d__bacteria	p__spirochaetota	c__spirochaetia	o__treponematales	f__termitinemataceae	g__treponema_g	s__Treponema_G caldarium	GCF_000219725.1	3	3	0	3	1
d__bacteria	p__spirochaetota	c__spirochaetia	o__treponematales	f__treponemataceae	g__treponema_f	s__Treponema_F brennaborense	GCF_000212415.1	4	4	0	4	1
d__bacteria	p__spirochaetota	c__spirochaetia	o__treponematales	f__treponemataceae	g__treponema_d	s__Treponema_D succinifaciens	GCF_000195275.1	4	4	0	4	1
d__bacteria	p__spirochaetota	c__spirochaetia	o__treponematales	f__treponemataceae	g__treponema_d	s__Treponema_D sp900541995	GCF_016117655.1	4	2	2	4	3
d__bacteria	p__spirochaetota	c__spirochaetia	o__treponematales	f__treponemataceae	g__treponema_d	s__Treponema_D parvum_A	GCF_017893945.1	2	2	0	2	1
d__bacteria	p__spirochaetota	c__spirochaetia	o__treponematales	f__treponemataceae	g__treponema_d	s__Treponema_D parvum	GCF_017893965.1	2	2	0	2	1
d__bacteria	p__spirochaetota	c__spirochaetia	o__treponematales	f__treponemataceae	g__treponema_d	s__Treponema_D buccale	GCF_902983995.1	3	3	0	3	2
d__bacteria	p__spirochaetota	c__spirochaetia	o__treponematales	f__treponemataceae	g__treponema_b	s__Treponema_B putidum	GCF_000755145.1	2	1	1	1	1
d__bacteria	p__spirochaetota	c__spirochaetia	o__treponematales	f__treponemataceae	g__treponema_b	s__Treponema_B pedis	GCF_017161325.1	2	2	0	2	1
d__bacteria	p__spirochaetota	c__spirochaetia	o__treponematales	f__treponemataceae	g__treponema_b	s__Treponema_B denticola	GCF_000008185.1	2	2	0	2	1
d__bacteria	p__spirochaetota	c__spirochaetia	o__treponematales	f__treponemataceae	g__treponema	s__Treponema sp018336815	GCF_018336815.1	2	2	0	2	1
d__bacteria	p__spirochaetota	c__spirochaetia	o__treponematales	f__treponemataceae	g__treponema	s__Treponema sp010365865	GCF_010365865.1	2	2	0	2	1
d__bacteria	p__spirochaetota	c__spirochaetia	o__treponematales	f__treponemataceae	g__treponema	s__Treponema sp000775995	GCF_000775995.1	2	2	0	2	1
d__bacteria	p__spirochaetota	c__spirochaetia	o__treponematales	f__treponemataceae	g__treponema	s__Treponema phagedenis	GCF_008153345.1	2	2	0	2	1
d__bacteria	p__spirochaetota	c__spirochaetia	o__treponematales	f__treponemataceae	g__treponema	s__Treponema medium	GCF_017161265.1	2	2	0	2	1
d__bacteria	p__actinobacteriota	c__actinomycetia	o__mycobacteriales	f__mycobacteriaceae	g__tomitella	s__Tomitella sp014126825	GCF_014126825.1	4	4	0	4	1
d__bacteria	p__actinobacteriota	c__actinomycetia	o__mycobacteriales	f__mycobacteriaceae	g__tomitella	s__Tomitella sp007559025	GCF_007559025.1	4	4	0	4	1
d__bacteria	p__proteobacteria	c__gammaproteobacteria	o__enterobacterales	f__aeromonadaceae	g__tolumonas	s__Tolumonas auensis	GCF_000023065.1	8	8	0	8	2
d__bacteria	p__proteobacteria	c__alphaproteobacteria	o__tistrellales	f__tistrellaceae	g__tistrella	s__Tistrella mobilis	GCF_000264455.2	4	4	0	4	1
d__bacteria	p__proteobacteria	c__gammaproteobacteria	o__thiotrichales	f__thiotrichaceae	g__thiothrix	s__Thiothrix unzii	GCF_017901175.1	2	2	0	2	1
d__bacteria	p__proteobacteria	c__gammaproteobacteria	o__thiotrichales	f__thiotrichaceae	g__thiothrix	s__Thiothrix sp017901155	GCF_017901155.1	2	2	0	2	1
d__bacteria	p__proteobacteria	c__gammaproteobacteria	o__thiotrichales	f__thiotrichaceae	g__thiothrix	s__Thiothrix sp017901135	GCF_017901135.1	3	3	0	3	1
d__bacteria	p__proteobacteria	c__gammaproteobacteria	o__thiotrichales	f__thiotrichaceae	g__thiothrix	s__Thiothrix sp016772315	GCF_016772315.1	4	4	0	4	1
d__bacteria	p__proteobacteria	c__gammaproteobacteria	o__thiomicrospirales	f__thiomicrospiraceae	g__thiosulfativibrio	s__Thiosulfativibrio zosterae	GCF_011398155.1	3	3	0	3	1
d__bacteria	p__spirochaetota	c__spirochaetia	o__spirochaetales_e	f__dsm-19205	g__thiospirochaeta	s__Thiospirochaeta perfilievii	GCF_008329945.1	7	2	5	7	2
d__bacteria	p__proteobacteria	c__gammaproteobacteria	o__burkholderiales	f__burkholderiaceae	g__thiomonas	s__Thiomonas intermedia	GCF_002028405.1	1	1	0	1	1
d__bacteria	p__proteobacteria	c__gammaproteobacteria	o__thiomicrospirales	f__thiomicrospiraceae	g__thiomicrospira	s__Thiomicrospira cyclica	GCF_000214825.1	2	2	0	2	1
d__bacteria	p__proteobacteria	c__gammaproteobacteria	o__thiomicrospirales	f__thiomicrospiraceae	g__thiomicrospira	s__Thiomicrospira aerophila	GCF_000227665.2	2	2	0	2	1
d__bacteria	p__proteobacteria	c__gammaproteobacteria	o__thiomicrospirales	f__thiomicrospiraceae	g__thiomicrorhabdus	s__Thiomicrorhabdus xiamenensis	GCF_013282625.1	3	3	0	3	1
d__bacteria	p__proteobacteria	c__gammaproteobacteria	o__thiomicrospirales	f__thiomicrospiraceae	g__thiomicrorhabdus	s__Thiomicrorhabdus sp011398355	GCF_011398355.1	4	4	0	4	1
d__bacteria	p__proteobacteria	c__gammaproteobacteria	o__thiomicrospirales	f__thiomicrospiraceae	g__thiomicrorhabdus	s__Thiomicrorhabdus sediminis	GCF_005885815.1	3	3	0	3	1
d__bacteria	p__proteobacteria	c__gammaproteobacteria	o__thiomicrospirales	f__thiomicrospiraceae	g__thiomicrorhabdus	s__Thiomicrorhabdus indica	GCF_004293625.1	3	3	0	3	1
d__bacteria	p__proteobacteria	c__gammaproteobacteria	o__thiomicrospirales	f__thiomicrospiraceae	g__thiomicrorhabdus	s__Thiomicrorhabdus aquaedulcis	GCF_004001325.1	3	3	0	3	1
d__bacteria	p__proteobacteria	c__gammaproteobacteria	o__chromatiales	f__sedimenticolaceae	g__thiolapillus	s__Thiolapillus brandeum	GCF_000828615.1	1	1	0	1	1
d__bacteria	p__proteobacteria	c__gammaproteobacteria	o__thiohalobacterales	f__thiohalobacteraceae	g__thiohalobacter	s__Thiohalobacter thiocyanaticus_A	GCF_002356355.1	1	1	0	1	1
d__bacteria	p__proteobacteria	c__gammaproteobacteria	o__ps1	f__thioglobaceae	g__thioglobus	s__Thioglobus autotrophicus	GCF_001293165.1	1	1	0	1	1
d__bacteria	p__proteobacteria	c__gammaproteobacteria	o__chromatiales	f__chromatiaceae	g__thioflavicoccus	s__Thioflavicoccus mobilis	GCF_000327045.1	2	2	0	2	1
d__bacteria	p__proteobacteria	c__gammaproteobacteria	o__ps1	f__thioglobaceae	g__thiodubiliella	s__Thiodubiliella sp001875585	GCF_003711265.1	1	1	0	1	1
d__bacteria	p__proteobacteria	c__gammaproteobacteria	o__ps1	f__thioglobaceae	g__thiodubiliella	s__Thiodubiliella sp001547755	GCF_001547755.1	1	1	0	1	1
d__bacteria	p__proteobacteria	c__gammaproteobacteria	o__chromatiales	f__chromatiaceae	g__thiodictyon	s__Thiodictyon syntrophicum	GCF_002813775.1	2	2	0	2	1
d__bacteria	p__proteobacteria	c__alphaproteobacteria	o__rhodobacterales	f__rhodobacteraceae	g__thioclava	s__Thioclava nitratireducens	GCF_001940525.2	3	3	0	3	1
d__bacteria	p__proteobacteria	c__alphaproteobacteria	o__rhodobacterales	f__rhodobacteraceae	g__thioclava	s__Thioclava electrotropha	GCF_002085925.2	3	3	0	3	1
d__bacteria	p__proteobacteria	c__gammaproteobacteria	o__burkholderiales	f__thiobacillaceae	g__thiobacillus	s__Thiobacillus denitrificans_B	GCF_000012745.1	2	2	0	2	1
d__bacteria	p__proteobacteria	c__gammaproteobacteria	o__ectothiorhodospirales	f__thioalkalivibrionaceae	g__thioalkalivibrio_b	s__Thioalkalivibrio_B paradoxus	GCF_000227685.2	1	1	0	1	1
d__bacteria	p__proteobacteria	c__gammaproteobacteria	o__ectothiorhodospirales	f__thioalkalivibrionaceae	g__thioalkalivibrio_b	s__Thioalkalivibrio_B nitratireducens	GCF_000321415.2	1	1	0	1	1
d__bacteria	p__proteobacteria	c__gammaproteobacteria	o__ectothiorhodospirales	f__ectothiorhodospiraceae	g__thioalkalivibrio_a	s__Thioalkalivibrio_A sulfidiphilus	GCF_000021985.1	1	1	0	1	1
d__bacteria	p__proteobacteria	c__gammaproteobacteria	o__ectothiorhodospirales	f__thioalkalivibrionaceae	g__thioalkalivibrio	s__Thioalkalivibrio sp000025545	GCF_000025545.1	1	1	0	1	1
d__bacteria	p__deinococcota	c__deinococci	o__deinococcales	f__thermaceae	g__thermus	s__Thermus thermophilus	GCF_000091545.1	2	2	0	2	2
d__bacteria	p__deinococcota	c__deinococci	o__deinococcales	f__thermaceae	g__thermus	s__Thermus sp000236585	GCF_000236585.1	2	2	0	2	2
d__bacteria	p__deinococcota	c__deinococci	o__deinococcales	f__thermaceae	g__thermus	s__Thermus parvatiensis	GCF_001535545.1	2	2	0	2	2
d__bacteria	p__deinococcota	c__deinococci	o__deinococcales	f__thermaceae	g__thermus	s__Thermus caldilimi	GCF_004684245.1	2	2	0	2	2
d__bacteria	p__deinococcota	c__deinococci	o__deinococcales	f__thermaceae	g__thermus	s__Thermus brockianus	GCF_001880325.1	2	2	0	2	2
d__bacteria	p__synergistota	c__synergistia	o__synergistales	f__thermovirgaceae	g__thermovirga	s__Thermovirga lienii	GCF_000233775.1	3	1	2	0	0
d__bacteria	p__aquificota	c__desulfurobacteriia	o__desulfurobacteriales	f__desulfurobacteriaceae	g__thermovibrio	s__Thermovibrio ammonificans	GCF_000185805.1	3	3	0	0	0
d__bacteria	p__acidobacteriota	c__holophagae	o__thermotomaculales	f__thermotomaculaceae	g__thermotomaculum	s__Thermotomaculum hydrothermale	GCF_016592575.1	2	2	0	0	0
d__bacteria	p__thermotogota	c__thermotogae	o__thermotogales	f__thermotogaceae	g__thermotoga	s__Thermotoga petrophila	GCF_000016785.1	1	1	0	1	1
d__bacteria	p__thermotogota	c__thermotogae	o__thermotogales	f__thermotogaceae	g__thermotoga	s__Thermotoga neapolitana	GCF_000018945.1	1	1	0	1	1
d__bacteria	p__thermotogota	c__thermotogae	o__thermotogales	f__thermotogaceae	g__thermotoga	s__Thermotoga maritima	GCF_000008545.1	1	1	0	1	1
d__bacteria	p__cyanobacteria	c__cyanobacteriia	o__thermosynechococcales	f__thermosynechococcaceae	g__thermosynechococcus	s__Thermosynechococcus sp008386235	GCF_008386235.1	1	1	0	1	1
d__bacteria	p__cyanobacteria	c__cyanobacteriia	o__thermosynechococcales	f__thermosynechococcaceae	g__thermosynechococcus	s__Thermosynechococcus elongatus_B	GCF_003555505.1	1	1	0	1	1
d__bacteria	p__cyanobacteria	c__cyanobacteriia	o__thermosynechococcales	f__thermosynechococcaceae	g__thermosynechococcus	s__Thermosynechococcus elongatus_A	GCF_000011345.1	1	1	0	1	1
d__bacteria	p__desulfobacterota	c__thermodesulfobacteria	o__thermodesulfobacteriales	f__st65	g__thermosulfuriphilus	s__Thermosulfuriphilus ammonigenes	GCF_011207455.1	1	1	0	1	1
d__bacteria	p__desulfobacterota	c__thermodesulfobacteria	o__thermodesulfobacteriales	f__thermodesulfobacteriaceae	g__thermosulfurimonas_a	s__Thermosulfurimonas_A marina	GCF_012317585.1	1	1	0	1	1
d__bacteria	p__thermosulfidibacterota	c__thermosulfidibacteria	o__thermosulfidibacterales	f__thermosulfidibacteraceae	g__thermosulfidibacter	s__Thermosulfidibacter takaii	GCF_001547735.1	1	1	0	0	0
d__archaea	p__thermoproteota	c__thermoproteia	o__sulfolobales	f__desulfurococcaceae	g__thermosphaera	s__Thermosphaera aggregans_B	GCF_014962245.1	1	1	0	1	1
d__archaea	p__thermoproteota	c__thermoproteia	o__sulfolobales	f__desulfurococcaceae	g__thermosphaera	s__Thermosphaera aggregans	GCF_000092185.1	1	1	0	1	1
d__bacteria	p__thermotogota	c__thermotogae	o__thermotogales	f__fervidobacteriaceae	g__thermosipho	s__Thermosipho melanesiensis	GCF_000016905.1	4	4	0	4	2
d__bacteria	p__firmicutes_a	c__thermosediminibacteria	o__thermosediminibacterales	f__thermosediminibacteraceae	g__thermosediminibacter	s__Thermosediminibacter oceani	GCF_000144645.1	3	3	0	0	0
d__archaea	p__thermoproteota	c__thermoproteia	o__thermoproteales	f__thermoproteaceae	g__thermoproteus	s__Thermoproteus uzoniensis	GCF_000193375.1	1	1	0	1	1
d__archaea	p__thermoproteota	c__thermoproteia	o__thermoproteales	f__thermoproteaceae	g__thermoproteus	s__Thermoproteus tenax	GCF_000253055.1	1	1	0	1	1
d__archaea	p__thermoplasmatota	c__thermoplasmata	o__thermoplasmatales	f__thermoplasmataceae	g__thermoplasma	s__Thermoplasma volcanium	GCF_000011185.1	1	1	0	1	1
d__archaea	p__thermoplasmatota	c__thermoplasmata	o__thermoplasmatales	f__thermoplasmataceae	g__thermoplasma	s__Thermoplasma acidophilum	GCF_000195915.1	1	1	0	1	1
d__bacteria	p__actinobacteriota	c__coriobacteriia	o__coriobacteriales	f__atopobiaceae	g__thermophilibacter	s__Thermophilibacter timonensis	GCF_900119915.1	2	2	0	2	1
d__bacteria	p__actinobacteriota	c__coriobacteriia	o__coriobacteriales	f__atopobiaceae	g__thermophilibacter	s__Thermophilibacter sp002407785	GCF_015277515.1	2	2	0	2	1
d__bacteria	p__actinobacteriota	c__actinomycetia	o__streptosporangiales	f__streptosporangiaceae	g__thermomonospora	s__Thermomonospora curvata	GCF_000024385.1	4	4	0	4	1
d__bacteria	p__actinobacteriota	c__actinomycetia	o__streptosporangiales	f__streptosporangiaceae	g__thermomonospora	s__Thermomonospora amylolytica	GCF_003589885.1	4	4	0	4	1
d__bacteria	p__proteobacteria	c__gammaproteobacteria	o__xanthomonadales	f__xanthomonadaceae	g__thermomonas	s__Thermomonas sp014678725	GCF_014678725.1	2	2	0	2	1
d__bacteria	p__proteobacteria	c__gammaproteobacteria	o__xanthomonadales	f__xanthomonadaceae	g__thermomonas	s__Thermomonas sp011302915	GCF_011302915.1	2	2	0	2	2
d__bacteria	p__proteobacteria	c__gammaproteobacteria	o__xanthomonadales	f__xanthomonadaceae	g__thermomonas	s__Thermomonas sp006337105	GCF_006337105.1	2	2	0	2	2
d__bacteria	p__proteobacteria	c__gammaproteobacteria	o__xanthomonadales	f__xanthomonadaceae	g__thermomonas	s__Thermomonas carbonis	GCF_014396975.1	2	2	0	2	2
d__bacteria	p__proteobacteria	c__gammaproteobacteria	o__xanthomonadales	f__xanthomonadaceae	g__thermomonas	s__Thermomonas brevis	GCF_014395425.1	2	2	0	2	2
d__bacteria	p__chloroflexota	c__chloroflexia	o__thermomicrobiales	f__thermomicrobiaceae	g__thermomicrobium	s__Thermomicrobium roseum	GCF_000021685.1	2	2	0	2	2
d__bacteria	p__planctomycetota	c__planctomycetia	o__pirellulales	f__thermoguttaceae	g__thermogutta	s__Thermogutta terrifontis	GCF_002277955.1	1	1	0	1	1
d__archaea	p__thermoproteota	c__thermoproteia	o__sulfolobales	f__desulfurococcaceae	g__thermogladius	s__Thermogladius calderae	GCF_000264495.1	1	1	0	1	1
d__archaea	p__thermoproteota	c__thermoproteia	o__thermofilales	f__thermofilaceae	g__thermofilum_b	s__Thermofilum_B pendens_A	GCF_000015225.1	1	1	0	1	1
d__archaea	p__thermoproteota	c__thermoproteia	o__thermofilales	f__thermofilaceae	g__thermofilum_b	s__Thermofilum_B adornatum	GCF_000446015.1	1	1	0	1	1
d__bacteria	p__nitrospirota	c__thermodesulfovibrionia	o__thermodesulfovibrionales	f__thermodesulfovibrionaceae	g__thermodesulfovibrio	s__Thermodesulfovibrio yellowstonii	GCF_000020985.1	1	1	0	0	0
d__bacteria	p__thermodesulfobiota	c__thermodesulfobiia	o__thermodesulfobiales	f__thermodesulfobiaceae	g__thermodesulfobium	s__Thermodesulfobium narugense	GCF_000212395.1	2	2	0	0	0
d__bacteria	p__thermodesulfobiota	c__thermodesulfobiia	o__thermodesulfobiales	f__thermodesulfobiaceae	g__thermodesulfobium	s__Thermodesulfobium acidiphilum	GCF_003057965.1	2	2	0	0	0
d__bacteria	p__desulfobacterota	c__thermodesulfobacteria	o__thermodesulfobacteriales	f__thermodesulfobacteriaceae	g__thermodesulfobacterium	s__Thermodesulfobacterium sp008630935	GCF_008630935.1	1	1	0	1	1
d__bacteria	p__desulfobacterota	c__thermodesulfobacteria	o__thermodesulfobacteriales	f__thermodesulfobacteriaceae	g__thermodesulfobacterium	s__Thermodesulfobacterium geofontis	GCF_000215975.1	1	1	0	1	1
d__bacteria	p__desulfobacterota	c__thermodesulfobacteria	o__thermodesulfobacteriales	f__thermodesulfobacteriaceae	g__thermodesulfobacterium	s__Thermodesulfobacterium commune	GCF_000734015.1	1	1	0	1	1
d__bacteria	p__desulfobacterota	c__thermodesulfobacteria	o__thermodesulfobacteriales	f__thermodesulfatatoraceae	g__thermodesulfatator	s__Thermodesulfatator indicus	GCF_000217795.1	2	2	0	2	1
d__bacteria	p__aquificota	c__aquificae	o__aquificales	f__aquificaceae	g__thermocrinis	s__Thermocrinis ruber	GCF_000512735.1	1	1	0	1	1
d__bacteria	p__aquificota	c__aquificae	o__aquificales	f__aquificaceae	g__thermocrinis	s__Thermocrinis albus	GCF_000025605.1	1	1	0	1	1
d__archaea	p__methanobacteriota_b	c__thermococci	o__thermococcales	f__thermococcaceae	g__thermococcus_b	s__Thermococcus_B paralvinellae	GCF_000517445.1	1	1	0	1	1
d__archaea	p__methanobacteriota_b	c__thermococci	o__thermococcales	f__thermococcaceae	g__thermococcus_b	s__Thermococcus_B barophilus	GCF_000151105.2	1	1	0	1	1
d__archaea	p__methanobacteriota_b	c__thermococci	o__thermococcales	f__thermococcaceae	g__thermococcus_a	s__Thermococcus_A sp001484685	GCF_001484685.1	1	1	0	1	1
d__archaea	p__methanobacteriota_b	c__thermococci	o__thermococcales	f__thermococcaceae	g__thermococcus_a	s__Thermococcus_A sibiricus	GCF_000022545.1	1	1	0	1	1
d__archaea	p__methanobacteriota_b	c__thermococci	o__thermococcales	f__thermococcaceae	g__thermococcus_a	s__Thermococcus_A litoralis	GCF_000246985.2	1	1	0	1	1
d__archaea	p__methanobacteriota_b	c__thermococci	o__thermococcales	f__thermococcaceae	g__thermococcus	s__Thermococcus thioreducens	GCF_002214545.1	1	1	0	1	1
d__archaea	p__methanobacteriota_b	c__thermococci	o__thermococcales	f__thermococcaceae	g__thermococcus	s__Thermococcus sp900198835	GCF_900198835.1	1	1	0	1	1
d__archaea	p__methanobacteriota_b	c__thermococci	o__thermococcales	f__thermococcaceae	g__thermococcus	s__Thermococcus sp002214525	GCF_002214525.1	1	1	0	1	1
d__archaea	p__methanobacteriota_b	c__thermococci	o__thermococcales	f__thermococcaceae	g__thermococcus	s__Thermococcus sp000221185	GCF_000221185.1	1	1	0	1	1
d__archaea	p__methanobacteriota_b	c__thermococci	o__thermococcales	f__thermococcaceae	g__thermococcus	s__Thermococcus sp000151205	GCF_000151205.2	1	1	0	1	1
d__archaea	p__methanobacteriota_b	c__thermococci	o__thermococcales	f__thermococcaceae	g__thermococcus	s__Thermococcus siculi	GCF_002214505.1	1	1	0	1	1
d__archaea	p__methanobacteriota_b	c__thermococci	o__thermococcales	f__thermococcaceae	g__thermococcus	s__Thermococcus radiotolerans	GCF_002214565.1	1	1	0	1	1
d__archaea	p__methanobacteriota_b	c__thermococci	o__thermococcales	f__thermococcaceae	g__thermococcus	s__Thermococcus profundus	GCF_002214585.1	1	1	0	1	1
d__archaea	p__methanobacteriota_b	c__thermococci	o__thermococcales	f__thermococcaceae	g__thermococcus	s__Thermococcus piezophilus	GCF_001647085.1	1	1	0	1	1
d__archaea	p__methanobacteriota_b	c__thermococci	o__thermococcales	f__thermococcaceae	g__thermococcus	s__Thermococcus peptonophilus	GCF_001592435.1	1	1	0	1	1
d__archaea	p__methanobacteriota_b	c__thermococci	o__thermococcales	f__thermococcaceae	g__thermococcus	s__Thermococcus pacificus	GCF_002214485.1	1	1	0	1	1
d__archaea	p__methanobacteriota_b	c__thermococci	o__thermococcales	f__thermococcaceae	g__thermococcus	s__Thermococcus onnurineus	GCF_000018365.1	1	1	0	1	1
d__archaea	p__methanobacteriota_b	c__thermococci	o__thermococcales	f__thermococcaceae	g__thermococcus	s__Thermococcus nautili	GCF_000585495.1	1	1	0	1	1
d__archaea	p__methanobacteriota_b	c__thermococci	o__thermococcales	f__thermococcaceae	g__thermococcus	s__Thermococcus kodakarensis	GCF_000009965.1	1	1	0	1	1
d__archaea	p__methanobacteriota_b	c__thermococci	o__thermococcales	f__thermococcaceae	g__thermococcus	s__Thermococcus indicus	GCF_006274605.1	1	1	0	1	1
d__archaea	p__methanobacteriota_b	c__thermococci	o__thermococcales	f__thermococcaceae	g__thermococcus	s__Thermococcus guaymasensis	GCF_000816105.1	1	1	0	1	1
d__archaea	p__methanobacteriota_b	c__thermococci	o__thermococcales	f__thermococcaceae	g__thermococcus	s__Thermococcus gorgonarius	GCF_002214385.1	1	1	0	1	1
d__archaea	p__methanobacteriota_b	c__thermococci	o__thermococcales	f__thermococcaceae	g__thermococcus	s__Thermococcus gammatolerans	GCF_000022365.1	1	1	0	1	1
d__archaea	p__methanobacteriota_b	c__thermococci	o__thermococcales	f__thermococcaceae	g__thermococcus	s__Thermococcus eurythermalis	GCF_000769655.1	1	1	0	1	1
d__archaea	p__methanobacteriota_b	c__thermococci	o__thermococcales	f__thermococcaceae	g__thermococcus	s__Thermococcus cleftensis	GCF_000265525.1	1	1	0	1	1
d__archaea	p__methanobacteriota_b	c__thermococci	o__thermococcales	f__thermococcaceae	g__thermococcus	s__Thermococcus celer	GCF_002214365.1	1	1	0	1	1
d__archaea	p__methanobacteriota_b	c__thermococci	o__thermococcales	f__thermococcaceae	g__thermococcus	s__Thermococcus camini	GCF_904067545.1	1	1	0	1	1
d__archaea	p__methanobacteriota_b	c__thermococci	o__thermococcales	f__thermococcaceae	g__thermococcus	s__Thermococcus barossii	GCF_002214465.1	1	1	0	1	1
d__bacteria	p__firmicutes_a	c__clostridia	o__acetivibrionales	f__dsm-8532	g__thermoclostridium	s__Thermoclostridium stercorarium	GCF_000331995.1	3	3	0	3	1
d__bacteria	p__proteobacteria	c__gammaproteobacteria	o__chromatiales	f__chromatiaceae	g__thermochromatium	s__Thermochromatium tepidum	GCF_009664085.1	3	3	0	3	1
d__bacteria	p__actinobacteriota	c__actinomycetia	o__streptosporangiales	f__streptosporangiaceae	g__thermobispora	s__Thermobispora bispora	GCF_000092645.1	4	4	0	4	3
d__bacteria	p__chloroflexota	c__chloroflexia	o__thermobaculales	f__thermobaculaceae	g__thermobaculum	s__Thermobaculum terrenum	GCF_000025005.1	2	2	0	2	1
d__bacteria	p__firmicutes_a	c__thermoanaerobacteria	o__thermoanaerobacterales	f__thermoanaerobacteraceae	g__thermoanaerobacterium	s__Thermoanaerobacterium xylanolyticum	GCF_000189775.2	5	5	0	5	5
d__bacteria	p__firmicutes_a	c__thermoanaerobacteria	o__thermoanaerobacterales	f__thermoanaerobacteraceae	g__thermoanaerobacterium	s__Thermoanaerobacterium thermosaccharolyticum	GCF_000145615.1	5	5	0	5	5
d__bacteria	p__firmicutes_a	c__thermoanaerobacteria	o__thermoanaerobacterales	f__thermoanaerobacteraceae	g__thermoanaerobacterium	s__Thermoanaerobacterium aotearoense	GCF_009905255.1	5	5	0	5	5
d__bacteria	p__firmicutes_a	c__thermoanaerobacteria	o__thermoanaerobacterales	f__thermoanaerobacteraceae	g__thermoanaerobacter	s__Thermoanaerobacter wiegelii	GCF_000147695.2	4	4	0	4	2
d__bacteria	p__firmicutes_a	c__thermoanaerobacteria	o__thermoanaerobacterales	f__thermoanaerobacteraceae	g__thermoanaerobacter	s__Thermoanaerobacter pseudethanolicus	GCF_000019085.1	4	4	0	4	2
d__bacteria	p__firmicutes_a	c__thermoanaerobacteria	o__thermoanaerobacterales	f__thermoanaerobacteraceae	g__thermoanaerobacter	s__Thermoanaerobacter kivui	GCF_000763575.1	4	4	0	4	2
d__bacteria	p__synergistota	c__synergistia	o__synergistales	f__synergistaceae	g__thermanaerovibrio	s__Thermanaerovibrio acidaminovorans	GCF_000024905.1	3	3	0	0	0
d__bacteria	p__firmicutes_b	c__peptococcia	o__dri-13		g__thermanaerosceptrum	s__Thermanaerosceptrum fracticalcis	GCF_000746025.2	5	0	5	0	0
d__bacteria	p__firmicutes_e	c__thermaerobacteria	o__thermaerobacterales	f__thermaerobacteraceae	g__thermaerobacter	s__Thermaerobacter sp004634385	GCF_004634385.1	2	2	0	0	0
d__bacteria	p__firmicutes_e	c__thermaerobacteria	o__thermaerobacterales	f__thermaerobacteraceae	g__thermaerobacter	s__Thermaerobacter marianensis	GCF_000184705.1	2	2	0	0	0
d__bacteria	p__firmicutes_b	c__moorellia	o__thermacetogeniales	f__thermacetogeniaceae	g__thermacetogenium	s__Thermacetogenium phaeum	GCF_000305935.1	3	3	0	0	0
d__bacteria	p__proteobacteria	c__gammaproteobacteria	o__burkholderiales	f__rhodocyclaceae	g__thauera_a	s__Thauera_A hydrothermalis	GCF_003345255.1	3	3	0	3	1
d__bacteria	p__proteobacteria	c__gammaproteobacteria	o__burkholderiales	f__rhodocyclaceae	g__thauera	s__Thauera sp002354895	GCF_002354895.1	4	4	0	4	1
d__bacteria	p__proteobacteria	c__gammaproteobacteria	o__burkholderiales	f__rhodocyclaceae	g__thauera	s__Thauera humireducens	GCF_001051995.2	4	4	0	4	1
d__bacteria	p__proteobacteria	c__gammaproteobacteria	o__burkholderiales	f__rhodocyclaceae	g__thauera	s__Thauera chlorobenzoica	GCF_001922305.1	4	4	0	4	1
d__bacteria	p__proteobacteria	c__gammaproteobacteria	o__burkholderiales	f__rhodocyclaceae	g__thauera	s__Thauera aromatica	GCF_003030465.1	4	2	2	4	1
d__bacteria	p__proteobacteria	c__gammaproteobacteria	o__enterobacterales	f__alteromonadaceae	g__thalassotalea_a	s__Thalassotalea_A sp007197775	GCF_007197775.1	6	6	0	6	1
d__bacteria	p__proteobacteria	c__gammaproteobacteria	o__enterobacterales	f__alteromonadaceae	g__thalassotalea_a	s__Thalassotalea_A sp004752005	GCF_004752005.1	6	6	0	6	3
d__bacteria	p__proteobacteria	c__gammaproteobacteria	o__enterobacterales	f__alteromonadaceae	g__thalassotalea_a	s__Thalassotalea_A crassostreae	GCF_001831495.1	6	6	0	6	2
d__bacteria	p__proteobacteria	c__gammaproteobacteria	o__enterobacterales	f__alteromonadaceae	g__thalassotalea	s__Thalassotalea sp014898095	GCF_014898095.1	6	6	0	6	3
d__bacteria	p__proteobacteria	c__alphaproteobacteria	o__rhodospirillales	f__thalassospiraceae	g__thalassospira	s__Thalassospira xiamenensis	GCF_000300235.2	4	4	0	4	1
d__bacteria	p__proteobacteria	c__alphaproteobacteria	o__rhodospirillales	f__thalassospiraceae	g__thalassospira	s__Thalassospira marina	GCF_002844375.1	6	6	0	6	1
d__bacteria	p__proteobacteria	c__alphaproteobacteria	o__rhodospirillales	f__thalassospiraceae	g__thalassospira	s__Thalassospira indica	GCF_003403095.1	4	4	0	4	1
d__bacteria	p__proteobacteria	c__gammaproteobacteria	o__pseudomonadales	f__dsm-6294	g__thalassolituus	s__Thalassolituus oleivorans	GCF_000355675.1	4	4	0	4	2
d__bacteria	p__firmicutes	c__bacilli	o__lactobacillales	f__enterococcaceae	g__tetragenococcus	s__Tetragenococcus osmophilus	GCF_003795125.1	5	5	0	5	1
d__bacteria	p__firmicutes	c__bacilli	o__lactobacillales	f__enterococcaceae	g__tetragenococcus	s__Tetragenococcus koreensis	GCF_003795145.1	5	5	0	5	1
d__bacteria	p__acidobacteriota	c__acidobacteriae	o__acidobacteriales	f__acidobacteriaceae	g__terriglobus_a	s__Terriglobus_A albidus	GCF_008000815.1	1	0	1	1	1
d__bacteria	p__acidobacteriota	c__acidobacteriae	o__acidobacteriales	f__acidobacteriaceae	g__terriglobus	s__Terriglobus saanensis	GCF_000179915.2	1	0	1	1	1
d__bacteria	p__acidobacteriota	c__acidobacteriae	o__acidobacteriales	f__acidobacteriaceae	g__terriglobus	s__Terriglobus roseus	GCF_000265425.1	2	0	2	2	1
d__bacteria	p__proteobacteria	c__alphaproteobacteria	o__caulobacterales	f__th1-2	g__terricaulis	s__Terricaulis sp001679665	GCA_001679665.1	1	1	0	1	1
d__bacteria	p__proteobacteria	c__alphaproteobacteria	o__caulobacterales	f__th1-2	g__terricaulis	s__Terricaulis silvestris	GCF_009792355.1	1	1	0	1	1
d__bacteria	p__firmicutes	c__bacilli	o__bacillales_d	f__amphibacillaceae	g__terribacillus	s__Terribacillus aidingensis_A	GCF_019056395.1	8	8	0	8	3
d__bacteria	p__spirochaetota	c__spirochaetia	o__treponematales	f__termitinemataceae	g__termitinema	s__Termitinema primitia	GCF_000214375.1	2	2	0	2	1
d__bacteria	p__proteobacteria	c__gammaproteobacteria	o__pseudomonadales	f__cellvibrionaceae	g__teredinibacter	s__Teredinibacter turnerae_B	GCF_000023025.1	3	3	0	3	1
d__bacteria	p__proteobacteria	c__gammaproteobacteria	o__pseudomonadales	f__cellvibrionaceae	g__teredinibacter	s__Teredinibacter purpureus	GCF_014217335.1	2	2	0	2	1
d__bacteria	p__proteobacteria	c__gammaproteobacteria	o__pseudomonadales	f__cellvibrionaceae	g__teredinibacter	s__Teredinibacter haidensis	GCF_014211975.1	2	2	0	2	2
d__bacteria	p__proteobacteria	c__alphaproteobacteria	o__rhodospirillales	f__terasakiellaceae	g__terasakiella	s__Terasakiella sp004564135	GCF_004564135.1	3	3	0	3	1
d__bacteria	p__thermotogota	c__thermotogae	o__petrotogales	f__petrotogaceae	g__tepiditoga	s__Tepiditoga spiralis	GCF_014701195.1	6	6	0	6	1
d__bacteria	p__chloroflexota	c__dehalococcoidia	o__tepidiformales	f__tepidiformaceae	g__tepidiforma	s__Tepidiforma bonchosmolovskayae	GCF_008838325.1	1	1	0	1	1
d__bacteria	p__firmicutes_a	c__thermosediminibacteria	o__thermosediminibacterales	f__tepidanaerobacteraceae	g__tepidanaerobacter	s__Tepidanaerobacter acetatoxydans	GCF_000328765.2	2	2	0	0	0
d__bacteria	p__bacteroidota	c__bacteroidia	o__bacteroidales	f__tenuifilaceae	g__tenuifilum	s__Tenuifilum thalassicum	GCF_013265555.1	3	3	0	3	1
d__bacteria	p__bacteroidota	c__bacteroidia	o__flavobacteriales	f__flavobacteriaceae	g__tenacibaculum_a	s__Tenacibaculum_A todarodis	GCF_001889045.1	3	3	0	3	1
d__bacteria	p__bacteroidota	c__bacteroidia	o__flavobacteriales	f__flavobacteriaceae	g__tenacibaculum	s__Tenacibaculum maritimum	GCF_900119795.1	6	6	0	6	1
d__bacteria	p__bacteroidota	c__bacteroidia	o__flavobacteriales	f__flavobacteriaceae	g__tenacibaculum	s__Tenacibaculum jejuense	GCF_900198195.1	3	3	0	3	1
d__bacteria	p__planctomycetota	c__planctomycetia	o__gemmatales	f__gemmataceae	g__telmatocola	s__Telmatocola sphagniphila	GCF_018398935.1	1	0	1	1	1
d__bacteria	p__firmicutes_b	c__tc1				s__TC1 sp001584725	GCF_001584725.1	2	2	0	0	0
d__bacteria	p__proteobacteria	c__gammaproteobacteria	o__burkholderiales	f__burkholderiaceae	g__taylorella	s__Taylorella equigenitalis	GCF_000276685.1	3	3	0	3	2
d__bacteria	p__proteobacteria	c__gammaproteobacteria	o__enterobacterales	f__enterobacteriaceae	g__tatumella	s__Tatumella citrea	GCF_002163585.1	7	7	0	7	1
d__bacteria	p__proteobacteria	c__gammaproteobacteria	o__legionellales	f__legionellaceae	g__tatlockia	s__Tatlockia micdadei	GCF_000953635.1	3	3	0	3	2
d__bacteria	p__proteobacteria	c__gammaproteobacteria	o__legionellales	f__legionellaceae	g__tatlockia	s__Tatlockia lansingensis	GCF_900187355.1	4	4	0	4	3
d__bacteria	p__proteobacteria	c__gammaproteobacteria	o__legionellales	f__legionellaceae	g__tatlockia	s__Tatlockia jordanis	GCF_900637635.1	4	4	0	4	4
d__bacteria	p__proteobacteria	c__gammaproteobacteria	o__legionellales	f__legionellaceae	g__tatlockia	s__Tatlockia hackeliae	GCF_000953655.1	4	4	0	4	3
d__bacteria	p__proteobacteria	c__gammaproteobacteria	o__legionellales	f__legionellaceae	g__tatlockia	s__Tatlockia clemsonensis	GCF_002240035.1	4	4	0	4	3
d__bacteria	p__proteobacteria	c__alphaproteobacteria	o__rhodobacterales	f__rhodobacteraceae	g__tateyamaria	s__Tateyamaria omphalii_A	GCF_001969365.1	1	1	0	1	1
d__bacteria	p__proteobacteria	c__alphaproteobacteria	o__rhizobiales	f__xanthobacteraceae	g__tardiphaga	s__Tardiphaga sp018279705	GCF_018279705.1	2	2	0	2	1
d__bacteria	p__proteobacteria	c__alphaproteobacteria	o__sphingomonadales	f__sphingomonadaceae	g__tardibacter	s__Tardibacter chloracetimidivorans	GCF_001890385.1	2	2	0	2	1
d__bacteria	p__bacteroidota	c__bacteroidia	o__flavobacteriales	f__flavobacteriaceae	g__tamlana_a	s__Tamlana_A carrageenivorans	GCF_002893765.1	3	3	0	3	1
d__bacteria	p__proteobacteria	c__gammaproteobacteria	o__enterobacterales_a	f__enterobacteriaceae_a	g__tachikawaea	s__Tachikawaea gelatinosa	GCF_000828815.1	3	3	0	3	1
d__bacteria	p__proteobacteria	c__alphaproteobacteria	o__rhodobacterales	f__rhodobacteraceae	g__tabrizicola	s__Tabrizicola piscis	GCF_003940805.1	2	2	0	2	1
d__bacteria	p__desulfobacterota	c__desulfuromonadia	o__desulfuromonadales	f__szua-540		s__SZUA-540 sp009731355	GCF_009731355.2	2	2	0	2	1
d__bacteria	p__desulfobacterota	c__syntrophia	o__syntrophales	f__syntrophaceae	g__syntrophus	s__Syntrophus aciditrophicus	GCF_000013405.1	1	1	0	0	0
d__bacteria	p__firmicutes_b	c__syntrophomonadia	o__syntrophomonadales	f__syntrophothermaceae	g__syntrophothermus	s__Syntrophothermus lipocalidus	GCF_000092405.1	2	1	1	0	0
d__bacteria	p__desulfobacterota	c__desulfuromonadia	o__desulfuromonadales	f__syntrophotaleaceae	g__syntrophotalea_a	s__Syntrophotalea_A acetylenivorans	GCF_001887775.1	3	3	0	3	1
d__bacteria	p__desulfobacterota	c__desulfuromonadia	o__desulfuromonadales	f__syntrophotaleaceae	g__syntrophotalea	s__Syntrophotalea carbinolica	GCF_000012885.1	2	2	0	2	1
d__bacteria	p__desulfobacterota	c__desulfuromonadia	o__desulfuromonadales	f__syntrophotaleaceae	g__syntrophotalea	s__Syntrophotalea acetylenica	GCF_001888165.1	4	4	0	4	1
d__bacteria	p__firmicutes_b	c__syntrophomonadia	o__syntrophomonadales	f__syntrophomonadaceae	g__syntrophomonas	s__Syntrophomonas wolfei	GCF_000014725.1	3	3	0	0	0
d__bacteria	p__firmicutes_b	c__syntrophomonadia	o__syntrophomonadales	f__syntrophomonadaceae	g__syntrophocurvum	s__Syntrophocurvum alkaliphilum	GCF_009734445.1	3	3	0	0	0
d__bacteria	p__firmicutes_b	c__desulfitobacteriia	o__desulfitobacteriales	f__syntrophobotulaceae	g__syntrophobotulus	s__Syntrophobotulus glycolicus	GCF_000190635.1	4	4	0	4	1
d__bacteria	p__desulfobacterota	c__syntrophobacteria	o__syntrophobacterales	f__syntrophobacteraceae	g__syntrophobacter	s__Syntrophobacter fumaroxidans	GCF_000014965.1	2	2	0	0	0
d__bacteria	p__cyanobacteria	c__cyanobacteriia	o__cyanobacteriales	f__microcystaceae_a	g__synechocystis	s__Synechocystis sp018282115	GCF_018282115.1	2	2	0	2	1
d__bacteria	p__cyanobacteria	c__cyanobacteriia	o__cyanobacteriales	f__microcystaceae_a	g__synechocystis	s__Synechocystis sp000478825	GCF_000478825.2	2	2	0	2	1
d__bacteria	p__cyanobacteria	c__cyanobacteriia	o__cyanobacteriales	f__microcystaceae_a	g__synechocystis	s__Synechocystis sp000284455	GCF_000284455.1	2	2	0	2	1
d__bacteria	p__cyanobacteria	c__cyanobacteriia	o__pcc-6307	f__cyanobiaceae	g__synechococcus_e	s__Synechococcus_E sp014279755	GCF_014279755.1	2	2	0	2	1
d__bacteria	p__cyanobacteria	c__cyanobacteriia	o__pcc-6307	f__cyanobiaceae	g__synechococcus_e	s__Synechococcus_E sp002724845	GCF_014279895.1	2	2	0	2	1
d__bacteria	p__cyanobacteria	c__cyanobacteriia	o__pcc-6307	f__cyanobiaceae	g__synechococcus_e	s__Synechococcus_E sp000737595	GCF_000737595.1	3	3	0	3	1
d__bacteria	p__cyanobacteria	c__cyanobacteriia	o__pcc-6307	f__cyanobiaceae	g__synechococcus_e	s__Synechococcus_E sp000737575	GCF_000737575.1	2	2	0	2	1
d__bacteria	p__cyanobacteria	c__cyanobacteriia	o__pcc-6307	f__cyanobiaceae	g__synechococcus_e	s__Synechococcus_E sp000737535	GCF_000737535.1	1	1	0	1	1
d__bacteria	p__cyanobacteria	c__cyanobacteriia	o__pcc-6307	f__cyanobiaceae	g__synechococcus_e	s__Synechococcus_E sp000195975	GCF_000195975.1	2	2	0	2	1
d__bacteria	p__cyanobacteria	c__cyanobacteriia	o__pcc-6307	f__cyanobiaceae	g__synechococcus_e	s__Synechococcus_E sp000161795	GCF_000161795.2	2	2	0	2	1
d__bacteria	p__cyanobacteria	c__cyanobacteriia	o__pcc-6307	f__cyanobiaceae	g__synechococcus_e	s__Synechococcus_E sp000012625	GCF_000012625.1	2	2	0	2	1
d__bacteria	p__cyanobacteria	c__cyanobacteriia	o__pcc-6307	f__cyanobiaceae	g__synechococcus_e	s__Synechococcus_E sp000012505	GCF_000012505.1	2	2	0	2	1
d__bacteria	p__cyanobacteria	c__cyanobacteriia	o__pcc-6307	f__cyanobiaceae	g__synechococcus_c	s__Synechococcus_C sp014279975	GCF_014279975.1	2	2	0	2	1
d__bacteria	p__cyanobacteria	c__cyanobacteriia	o__pcc-6307	f__cyanobiaceae	g__synechococcus_c	s__Synechococcus_C sp014279835	GCF_014279835.1	2	2	0	2	1
d__bacteria	p__cyanobacteria	c__cyanobacteriia	o__pcc-6307	f__cyanobiaceae	g__synechococcus_c	s__Synechococcus_C sp014279815	GCF_014279815.1	2	2	0	2	1
d__bacteria	p__cyanobacteria	c__cyanobacteriia	o__pcc-6307	f__cyanobiaceae	g__synechococcus_c	s__Synechococcus_C sp014279795	GCF_014279795.1	2	2	0	2	1
d__bacteria	p__cyanobacteria	c__cyanobacteriia	o__pcc-6307	f__cyanobiaceae	g__synechococcus_c	s__Synechococcus_C sp004209775	GCF_004209775.1	2	2	0	2	1
d__bacteria	p__cyanobacteria	c__cyanobacteriia	o__pcc-6307	f__cyanobiaceae	g__synechococcus_c	s__Synechococcus_C sp002693285	GCF_014280035.1	2	2	0	2	1
d__bacteria	p__cyanobacteria	c__cyanobacteriia	o__pcc-6307	f__cyanobiaceae	g__synechococcus_c	s__Synechococcus_C sp002500205	GCF_014279775.1	2	2	0	2	1
d__bacteria	p__cyanobacteria	c__cyanobacteriia	o__pcc-6307	f__cyanobiaceae	g__synechococcus_c	s__Synechococcus_C sp002172935	GCF_014279875.1	2	2	0	2	1
d__bacteria	p__cyanobacteria	c__cyanobacteriia	o__pcc-6307	f__cyanobiaceae	g__synechococcus_c	s__Synechococcus_C sp001632165	GCF_014304815.1	2	2	0	2	1
d__bacteria	p__cyanobacteria	c__cyanobacteriia	o__pcc-6307	f__cyanobiaceae	g__synechococcus_c	s__Synechococcus_C sp000153065	GCF_014279595.1	2	2	0	2	1
d__bacteria	p__cyanobacteria	c__cyanobacteriia	o__pcc-6307	f__cyanobiaceae	g__synechococcus_c	s__Synechococcus_C sp000014585	GCF_000014585.1	2	2	0	2	1
d__bacteria	p__cyanobacteria	c__cyanobacteriia	o__thermosynechococcales	f__thermosynechococcaceae	g__synechococcus_a	s__Synechococcus_A lividus	GCF_002754935.1	1	1	0	1	1
d__bacteria	p__cyanobacteria	c__cyanobacteriia	o__synechococcales	f__synechococcaceae	g__synechococcus	s__Synechococcus elongatus	GCF_000010065.1	2	2	0	2	1
d__bacteria	p__planctomycetota	c__planctomycetia	o__planctomycetales	f__mal52	g__symmachiella	s__Symmachiella dynata	GCF_007747995.1	2	0	2	2	1
d__bacteria	p__firmicutes_e	c__symbiobacteriia	o__symbiobacteriales	f__symbiobacteriaceae	g__symbiobacterium	s__Symbiobacterium thermophilum	GCF_000009905.1	6	6	0	0	0
d__bacteria	p__proteobacteria	c__gammaproteobacteria	o__burkholderiales	f__burkholderiaceae	g__symbiobacter	s__Symbiobacter mobilis	GCF_000477435.1	2	2	0	2	1
d__bacteria	p__firmicutes_a	c__clostridia	o__peptostreptococcales	f__thermotaleaceae	g__sy095	s__SY095 sp008152325	GCF_008152325.1	11	11	0	11	5
d__bacteria	p__proteobacteria	c__alphaproteobacteria	o__acetobacterales	f__acetobacteraceae	g__swingsia	s__Swingsia samuiensis	GCF_006542355.1	6	6	0	6	1
d__bacteria	p__proteobacteria	c__alphaproteobacteria	o__rhodobacterales	f__rhodobacteraceae	g__sw4	s__SW4 sp002732825	GCF_008065155.1	1	1	0	1	1
d__bacteria	p__proteobacteria	c__gammaproteobacteria	o__burkholderiales	f__burkholderiaceae	g__sutterella	s__Sutterella megalosphaeroides	GCF_003609995.1	8	8	0	8	2
d__bacteria	p__proteobacteria	c__gammaproteobacteria	o__burkholderiales	f__burkholderiaceae	g__sutterella	s__Sutterella faecalis	GCF_006337085.1	6	6	0	6	2
d__bacteria	p__firmicutes	c__bacilli	o__bacillales	f__bacillaceae_i	g__sutcliffiella_a	s__Sutcliffiella_A sp009363695	GCF_009363695.1	9	9	0	9	3
d__bacteria	p__firmicutes	c__bacilli	o__bacillales	f__bacillaceae_i	g__sutcliffiella_a	s__Sutcliffiella_A horikoshii_C	GCF_002157855.1	8	8	0	8	2
d__bacteria	p__firmicutes	c__bacilli	o__bacillales	f__bacillaceae_i	g__sutcliffiella	s__Sutcliffiella cohnii	GCF_002250055.1	14	14	0	14	4
d__bacteria	p__campylobacterota	c__campylobacteria	o__campylobacterales	f__sulfurovaceae	g__sulfurovum	s__Sulfurovum sp000010345	GCF_000010345.1	3	3	0	3	1
d__bacteria	p__campylobacterota	c__campylobacteria	o__campylobacterales	f__sulfurovaceae	g__sulfurovum	s__Sulfurovum lithotrophicum	GCF_000987835.1	3	3	0	3	1
d__bacteria	p__campylobacterota	c__campylobacteria	o__campylobacterales	f__sulfurovaceae	g__sulfurovum	s__Sulfurovum indicum	GCF_014931715.1	3	3	0	3	1
d__bacteria	p__campylobacterota	c__campylobacteria	o__campylobacterales	f__sulfurospirillaceae	g__sulfurospirillum	s__Sulfurospirillum sp002309535	GCF_002309535.1	3	3	0	3	1
d__bacteria	p__campylobacterota	c__campylobacteria	o__campylobacterales	f__sulfurospirillaceae	g__sulfurospirillum	s__Sulfurospirillum sp002162315	GCF_002162315.1	3	3	0	3	1
d__bacteria	p__campylobacterota	c__campylobacteria	o__campylobacterales	f__sulfurospirillaceae	g__sulfurospirillum	s__Sulfurospirillum sp001548035	GCF_001548035.1	4	4	0	4	1
d__bacteria	p__campylobacterota	c__campylobacteria	o__campylobacterales	f__sulfurospirillaceae	g__sulfurospirillum	s__Sulfurospirillum multivorans	GCF_000568815.1	2	2	0	2	2
d__bacteria	p__campylobacterota	c__campylobacteria	o__campylobacterales	f__sulfurospirillaceae	g__sulfurospirillum	s__Sulfurospirillum halorespirans	GCF_001723605.1	2	2	0	2	1
d__bacteria	p__campylobacterota	c__campylobacteria	o__campylobacterales	f__sulfurospirillaceae	g__sulfurospirillum	s__Sulfurospirillum deleyianum	GCF_000024885.1	3	3	0	3	1
d__bacteria	p__campylobacterota	c__campylobacteria	o__campylobacterales	f__sulfurospirillaceae	g__sulfurospirillum	s__Sulfurospirillum cavolei	GCF_001548055.1	3	3	0	3	2
d__bacteria	p__campylobacterota	c__campylobacteria	o__campylobacterales	f__sulfurospirillaceae	g__sulfurospirillum	s__Sulfurospirillum barnesii	GCF_000265295.1	2	2	0	2	2
d__bacteria	p__proteobacteria	c__gammaproteobacteria	o__thiohalomonadales	f__thiohalomonadaceae	g__sulfurivermis	s__Sulfurivermis fontis	GCF_004001245.1	2	2	0	2	1
d__bacteria	p__proteobacteria	c__gammaproteobacteria	o__burkholderiales	f__thiobacillaceae	g__sulfuritortus	s__Sulfuritortus calidifontis	GCF_003967275.1	2	2	0	2	1
d__bacteria	p__proteobacteria	c__gammaproteobacteria	o__burkholderiales	f__rhodocyclaceae	g__sulfuritalea	s__Sulfuritalea hydrogenivorans	GCF_000828635.1	2	2	0	2	1
d__archaea	p__thermoproteota	c__thermoproteia	o__sulfolobales	f__sulfolobaceae	g__sulfurisphaera	s__Sulfurisphaera tokodaii	GCF_000011205.1	1	1	0	1	1
d__archaea	p__thermoproteota	c__thermoproteia	o__sulfolobales	f__sulfolobaceae	g__sulfurisphaera	s__Sulfurisphaera ohwakuensis	GCF_009729055.1	1	1	0	1	1
d__bacteria	p__campylobacterota	c__campylobacteria	o__campylobacterales	f__sulfurimonadaceae	g__sulfurimonas	s__Sulfurimonas sp017357825	GCF_017357825.1	4	4	0	4	1
d__bacteria	p__campylobacterota	c__campylobacteria	o__campylobacterales	f__sulfurimonadaceae	g__sulfurimonas	s__Sulfurimonas sp014905095	GCF_014905095.1	4	4	0	4	1
d__bacteria	p__campylobacterota	c__campylobacteria	o__campylobacterales	f__sulfurimonadaceae	g__sulfurimonas	s__Sulfurimonas sp009258225	GCF_009258225.1	4	4	0	4	1
d__bacteria	p__campylobacterota	c__campylobacteria	o__campylobacterales	f__sulfurimonadaceae	g__sulfurimonas	s__Sulfurimonas sp009068765	GCF_009068765.1	4	4	0	4	1
d__bacteria	p__campylobacterota	c__campylobacteria	o__campylobacterales	f__sulfurimonadaceae	g__sulfurimonas	s__Sulfurimonas sp002452895	GCF_009883775.1	3	3	0	3	1
d__bacteria	p__campylobacterota	c__campylobacteria	o__campylobacterales	f__sulfurimonadaceae	g__sulfurimonas	s__Sulfurimonas sediminis	GCF_014905115.1	4	4	0	4	1
d__bacteria	p__campylobacterota	c__campylobacteria	o__campylobacterales	f__sulfurimonadaceae	g__sulfurimonas	s__Sulfurimonas paralvinellae	GCF_014905135.1	4	4	0	4	1
d__bacteria	p__campylobacterota	c__campylobacteria	o__campylobacterales	f__sulfurimonadaceae	g__sulfurimonas	s__Sulfurimonas marisnigri	GCF_015265475.1	4	4	0	4	1
d__bacteria	p__campylobacterota	c__campylobacteria	o__campylobacterales	f__sulfurimonadaceae	g__sulfurimonas	s__Sulfurimonas denitrificans	GCF_000012965.1	4	4	0	4	1
d__bacteria	p__campylobacterota	c__campylobacteria	o__campylobacterales	f__sulfurimonadaceae	g__sulfurimonas	s__Sulfurimonas baltica	GCF_015265455.1	4	4	0	4	1
d__bacteria	p__campylobacterota	c__campylobacteria	o__campylobacterales	f__sulfurimonadaceae	g__sulfurimonas	s__Sulfurimonas autotrophica	GCF_000147355.1	4	4	0	4	1
d__bacteria	p__proteobacteria	c__gammaproteobacteria	o__burkholderiales	f__sulfuricellaceae	g__sulfurimicrobium	s__Sulfurimicrobium lacus	GCF_011764585.1	2	2	0	2	1
d__bacteria	p__aquificota	c__aquificae	o__hydrogenothermales	f__hydrogenothermaceae	g__sulfurihydrogenibium	s__Sulfurihydrogenibium azorense	GCF_000021545.1	2	2	0	2	1
d__bacteria	p__proteobacteria	c__gammaproteobacteria	o__acidiferrobacterales	f__sulfurifustaceae	g__sulfurifustis	s__Sulfurifustis variabilis	GCF_002355415.1	1	1	0	1	1
d__bacteria	p__proteobacteria	c__gammaproteobacteria	o__aks1		g__sulfuriflexus	s__Sulfuriflexus mobilis	GCF_003967195.1	1	1	0	1	1
d__bacteria	p__proteobacteria	c__gammaproteobacteria	o__burkholderiales	f__sulfuriferulaceae	g__sulfuriferula_a	s__Sulfuriferula_A sp002162035	GCF_002162035.1	3	3	0	3	1
d__bacteria	p__proteobacteria	c__gammaproteobacteria	o__burkholderiales	f__sulfuriferulaceae	g__sulfuriferula_a	s__Sulfuriferula_A nivalis	GCF_009937995.1	3	3	0	3	1
d__bacteria	p__proteobacteria	c__gammaproteobacteria	o__burkholderiales	f__sulfuriferulaceae	g__sulfuriferula	s__Sulfuriferula plumbiphila	GCF_009938015.1	2	2	0	2	1
d__bacteria	p__campylobacterota	c__campylobacteria	o__campylobacterales	f__sulfurimonadaceae	g__sulfuricurvum	s__Sulfuricurvum kujiense	GCF_000183725.1	3	3	0	3	1
d__bacteria	p__proteobacteria	c__gammaproteobacteria	o__burkholderiales	f__sulfuricellaceae	g__sulfuricella	s__Sulfuricella denitrificans	GCF_000297055.2	2	2	0	2	1
d__bacteria	p__proteobacteria	c__gammaproteobacteria	o__acidiferrobacterales	f__sulfurifustaceae	g__sulfuricaulis	s__Sulfuricaulis limicola	GCF_002355735.1	1	1	0	1	1
d__archaea	p__thermoproteota	c__thermoproteia	o__sulfolobales	f__sulfolobaceae	g__sulfuracidifex	s__Sulfuracidifex tepidarius	GCF_008326425.1	1	1	0	1	1
d__archaea	p__thermoproteota	c__thermoproteia	o__sulfolobales	f__sulfolobaceae	g__sulfolobus	s__Sulfolobus acidocaldarius	GCF_000012285.1	1	1	0	1	1
d__archaea	p__thermoproteota	c__thermoproteia	o__sulfolobales	f__sulfolobaceae	g__sulfodiicoccus	s__Sulfodiicoccus acidiphilus	GCF_003967175.1	1	1	0	1	1
d__bacteria	p__proteobacteria	c__alphaproteobacteria	o__rhodobacterales	f__rhodobacteraceae	g__sulfitobacter	s__Sulfitobacter sp018200035	GCF_018200035.1	2	2	0	2	1
d__bacteria	p__proteobacteria	c__alphaproteobacteria	o__rhodobacterales	f__rhodobacteraceae	g__sulfitobacter	s__Sulfitobacter sp009363555	GCF_009363555.1	2	2	0	2	2
d__bacteria	p__proteobacteria	c__alphaproteobacteria	o__rhodobacterales	f__rhodobacteraceae	g__sulfitobacter	s__Sulfitobacter sp006064855	GCF_006064855.1	2	0	2	2	2
d__bacteria	p__proteobacteria	c__alphaproteobacteria	o__rhodobacterales	f__rhodobacteraceae	g__sulfitobacter	s__Sulfitobacter sp003352085	GCF_003352085.1	1	1	0	1	1
d__bacteria	p__proteobacteria	c__alphaproteobacteria	o__rhodobacterales	f__rhodobacteraceae	g__sulfitobacter	s__Sulfitobacter sp003352065	GCF_003352065.1	1	1	0	1	1
d__bacteria	p__proteobacteria	c__alphaproteobacteria	o__rhodobacterales	f__rhodobacteraceae	g__sulfitobacter	s__Sulfitobacter sp001634775	GCF_003611275.1	4	4	0	4	4
d__bacteria	p__proteobacteria	c__alphaproteobacteria	o__rhodobacterales	f__rhodobacteraceae	g__sulfitobacter	s__Sulfitobacter mediterraneus_A	GCF_016801775.1	1	1	0	1	1
d__bacteria	p__proteobacteria	c__alphaproteobacteria	o__rhodobacterales	f__rhodobacteraceae	g__sulfitobacter	s__Sulfitobacter alexandrii	GCF_001886735.1	2	2	0	2	2
d__bacteria	p__bacteroidota	c__bacteroidia	o__flavobacteriales	f__blattabacteriaceae	g__sulcia	s__Sulcia muelleri_A	GCF_000829155.1	1	1	0	1	1
d__bacteria	p__bacteroidota	c__bacteroidia	o__flavobacteriales	f__blattabacteriaceae	g__sulcia	s__Sulcia muelleri	GCF_003214255.1	1	1	0	1	1
d__bacteria	p__firmicutes	c__bacilli	o__lactobacillales	f__aerococcaceae	g__suicoccus	s__Suicoccus acidiformans	GCF_003546865.1	4	4	0	4	1
d__bacteria	p__proteobacteria	c__gammaproteobacteria	o__enterobacterales	f__succinivibrionaceae	g__succinivibrio	s__Succinivibrio dextrinosolvens_A	GCF_011065405.1	7	7	0	7	2
d__bacteria	p__actinobacteriota	c__actinomycetia	o__actinomycetales	f__microbacteriaceae	g__subtercola	s__Subtercola sp018889995	GCF_018889995.1	2	2	0	2	1
d__archaea	p__thermoproteota	c__thermoproteia	o__sulfolobales	f__sulfolobaceae	g__stygiolobus	s__Stygiolobus azoricus	GCF_009729035.1	1	1	0	1	1
d__bacteria	p__actinobacteriota	c__actinomycetia	o__streptosporangiales	f__streptosporangiaceae	g__streptosporangium	s__Streptosporangium roseum	GCF_000024865.1	6	6	0	6	1
d__bacteria	p__actinobacteriota	c__actinomycetia	o__streptomycetales	f__streptomycetaceae	g__streptomyces_d	s__Streptomyces_D bronchialis	GCF_003258605.2	8	8	0	8	1
d__bacteria	p__actinobacteriota	c__actinomycetia	o__streptomycetales	f__streptomycetaceae	g__streptomyces	s__Streptomyces yunnanensis	GCF_016917755.1	7	7	0	7	3
d__bacteria	p__actinobacteriota	c__actinomycetia	o__streptomycetales	f__streptomycetaceae	g__streptomyces	s__Streptomyces yatensis	GCF_018069625.1	6	6	0	6	2
d__bacteria	p__actinobacteriota	c__actinomycetia	o__streptomycetales	f__streptomycetaceae	g__streptomyces	s__Streptomyces xinghaiensis	GCF_000220705.2	6	6	0	6	1
d__bacteria	p__actinobacteriota	c__actinomycetia	o__streptomycetales	f__streptomycetaceae	g__streptomyces	s__Streptomyces xiamenensis	GCF_000993785.3	5	5	0	5	1
d__bacteria	p__actinobacteriota	c__actinomycetia	o__streptomycetales	f__streptomycetaceae	g__streptomyces	s__Streptomyces viridosporus	GCF_008704515.1	6	6	0	6	3
d__bacteria	p__actinobacteriota	c__actinomycetia	o__streptomycetales	f__streptomycetaceae	g__streptomyces	s__Streptomyces violaceusniger_A	GCF_000147815.2	6	6	0	6	2
d__bacteria	p__actinobacteriota	c__actinomycetia	o__streptomycetales	f__streptomycetaceae	g__streptomyces	s__Streptomyces vinaceus	GCF_008704935.1	7	7	0	7	2
d__bacteria	p__actinobacteriota	c__actinomycetia	o__streptomycetales	f__streptomycetaceae	g__streptomyces	s__Streptomyces vietnamensis	GCF_000830005.1	7	7	0	7	1
d__bacteria	p__actinobacteriota	c__actinomycetia	o__streptomycetales	f__streptomycetaceae	g__streptomyces	s__Streptomyces venezuelae_F	GCF_008642335.1	6	6	0	6	1
d__bacteria	p__actinobacteriota	c__actinomycetia	o__streptomycetales	f__streptomycetaceae	g__streptomyces	s__Streptomyces venezuelae_E	GCF_008642275.1	7	7	0	7	3
d__bacteria	p__actinobacteriota	c__actinomycetia	o__streptomycetales	f__streptomycetaceae	g__streptomyces	s__Streptomyces venezuelae_D	GCF_008642315.1	6	6	0	6	1
d__bacteria	p__actinobacteriota	c__actinomycetia	o__streptomycetales	f__streptomycetaceae	g__streptomyces	s__Streptomyces venezuelae_C	GCF_008642295.1	6	6	0	6	1
d__bacteria	p__actinobacteriota	c__actinomycetia	o__streptomycetales	f__streptomycetaceae	g__streptomyces	s__Streptomyces venezuelae_B	GCF_008642355.1	6	6	0	6	1
d__bacteria	p__actinobacteriota	c__actinomycetia	o__streptomycetales	f__streptomycetaceae	g__streptomyces	s__Streptomyces venezuelae	GCF_008639165.1	7	7	0	7	1
d__bacteria	p__actinobacteriota	c__actinomycetia	o__streptomycetales	f__streptomycetaceae	g__streptomyces	s__Streptomyces tsukubensis_B	GCF_009296025.1	6	6	0	6	2
d__bacteria	p__actinobacteriota	c__actinomycetia	o__streptomycetales	f__streptomycetaceae	g__streptomyces	s__Streptomyces tsukubensis	GCF_003932715.1	6	6	0	6	2
d__bacteria	p__actinobacteriota	c__actinomycetia	o__streptomycetales	f__streptomycetaceae	g__streptomyces	s__Streptomyces tirandamycinicus	GCF_003097515.1	5	5	0	5	1
d__bacteria	p__actinobacteriota	c__actinomycetia	o__streptomycetales	f__streptomycetaceae	g__streptomyces	s__Streptomyces sviceus	GCF_003443735.1	6	6	0	6	2
d__bacteria	p__actinobacteriota	c__actinomycetia	o__streptomycetales	f__streptomycetaceae	g__streptomyces	s__Streptomyces subrutilus	GCF_008704535.1	7	7	0	7	2
d__bacteria	p__actinobacteriota	c__actinomycetia	o__streptomycetales	f__streptomycetaceae	g__streptomyces	s__Streptomyces spongiicola	GCF_003122365.1	6	6	0	6	2
d__bacteria	p__actinobacteriota	c__actinomycetia	o__streptomycetales	f__streptomycetaceae	g__streptomyces	s__Streptomyces spectabilis	GCF_008704795.1	6	6	0	6	2
d__bacteria	p__actinobacteriota	c__actinomycetia	o__streptomycetales	f__streptomycetaceae	g__streptomyces	s__Streptomyces sp018604545	GCF_018604545.1	6	6	0	6	3
d__bacteria	p__actinobacteriota	c__actinomycetia	o__streptomycetales	f__streptomycetaceae	g__streptomyces	s__Streptomyces sp016756395	GCF_016756395.1	6	6	0	6	2
d__bacteria	p__actinobacteriota	c__actinomycetia	o__streptomycetales	f__streptomycetaceae	g__streptomyces	s__Streptomyces sp016598615	GCF_016598615.1	6	6	0	6	3
d__bacteria	p__actinobacteriota	c__actinomycetia	o__streptomycetales	f__streptomycetaceae	g__streptomyces	s__Streptomyces sp016598575	GCF_016598575.1	6	6	0	6	1
d__bacteria	p__actinobacteriota	c__actinomycetia	o__streptomycetales	f__streptomycetaceae	g__streptomyces	s__Streptomyces sp014621695	GCF_014621695.1	7	7	0	7	3
d__bacteria	p__actinobacteriota	c__actinomycetia	o__streptomycetales	f__streptomycetaceae	g__streptomyces	s__Streptomyces sp014489635	GCF_014489635.1	6	6	0	6	1
d__bacteria	p__actinobacteriota	c__actinomycetia	o__streptomycetales	f__streptomycetaceae	g__streptomyces	s__Streptomyces sp014489615	GCF_014489615.1	6	6	0	6	1
d__bacteria	p__actinobacteriota	c__actinomycetia	o__streptomycetales	f__streptomycetaceae	g__streptomyces	s__Streptomyces sp013364195	GCF_013364195.1	6	6	0	6	1
d__bacteria	p__actinobacteriota	c__actinomycetia	o__streptomycetales	f__streptomycetaceae	g__streptomyces	s__Streptomyces sp013364155	GCF_013364155.1	6	6	0	6	2
d__bacteria	p__actinobacteriota	c__actinomycetia	o__streptomycetales	f__streptomycetaceae	g__streptomyces	s__Streptomyces sp013046785	GCF_013046785.1	6	6	0	6	2
d__bacteria	p__actinobacteriota	c__actinomycetia	o__streptomycetales	f__streptomycetaceae	g__streptomyces	s__Streptomyces sp012273515	GCF_012273515.1	6	6	0	6	2
d__bacteria	p__actinobacteriota	c__actinomycetia	o__streptomycetales	f__streptomycetaceae	g__streptomyces	s__Streptomyces sp010384365	GCF_010384365.1	6	6	0	6	1
d__bacteria	p__actinobacteriota	c__actinomycetia	o__streptomycetales	f__streptomycetaceae	g__streptomyces	s__Streptomyces sp009857135	GCF_009857135.1	6	6	0	6	2
d__bacteria	p__actinobacteriota	c__actinomycetia	o__streptomycetales	f__streptomycetaceae	g__streptomyces	s__Streptomyces sp009834125	GCF_009834125.1	7	7	0	7	3
d__bacteria	p__actinobacteriota	c__actinomycetia	o__streptomycetales	f__streptomycetaceae	g__streptomyces	s__Streptomyces sp009832925	GCF_009832925.1	6	6	0	6	1
d__bacteria	p__actinobacteriota	c__actinomycetia	o__streptomycetales	f__streptomycetaceae	g__streptomyces	s__Streptomyces sp006088715	GCF_006088715.1	6	6	0	6	2
d__bacteria	p__actinobacteriota	c__actinomycetia	o__streptomycetales	f__streptomycetaceae	g__streptomyces	s__Streptomyces sp003945545	GCF_003945545.1	6	6	0	6	2
d__bacteria	p__actinobacteriota	c__actinomycetia	o__streptomycetales	f__streptomycetaceae	g__streptomyces	s__Streptomyces sp003814525	GCF_018128905.1	6	6	0	6	1
d__bacteria	p__actinobacteriota	c__actinomycetia	o__streptomycetales	f__streptomycetaceae	g__streptomyces	s__Streptomyces sp003675325	GCF_003675325.1	6	6	0	6	1
d__bacteria	p__actinobacteriota	c__actinomycetia	o__streptomycetales	f__streptomycetaceae	g__streptomyces	s__Streptomyces sp003369795	GCF_003369795.1	6	6	0	6	2
d__bacteria	p__actinobacteriota	c__actinomycetia	o__streptomycetales	f__streptomycetaceae	g__streptomyces	s__Streptomyces sp003330845	GCF_003330845.1	6	6	0	6	3
d__bacteria	p__actinobacteriota	c__actinomycetia	o__streptomycetales	f__streptomycetaceae	g__streptomyces	s__Streptomyces sp003259585	GCF_009650765.1	7	7	0	7	2
d__bacteria	p__actinobacteriota	c__actinomycetia	o__streptomycetales	f__streptomycetaceae	g__streptomyces	s__Streptomyces sp003116725	GCF_003610995.1	6	6	0	6	2
d__bacteria	p__actinobacteriota	c__actinomycetia	o__streptomycetales	f__streptomycetaceae	g__streptomyces	s__Streptomyces sp003046555	GCF_004104505.1	6	6	0	6	2
d__bacteria	p__actinobacteriota	c__actinomycetia	o__streptomycetales	f__streptomycetaceae	g__streptomyces	s__Streptomyces sp003032475	GCF_003032475.1	6	6	0	6	1
d__bacteria	p__actinobacteriota	c__actinomycetia	o__streptomycetales	f__streptomycetaceae	g__streptomyces	s__Streptomyces sp002847285	GCF_002847285.1	5	5	0	5	1
d__bacteria	p__actinobacteriota	c__actinomycetia	o__streptomycetales	f__streptomycetaceae	g__streptomyces	s__Streptomyces sp002846625	GCF_012273535.1	6	6	0	6	2
d__bacteria	p__actinobacteriota	c__actinomycetia	o__streptomycetales	f__streptomycetaceae	g__streptomyces	s__Streptomyces sp002128305	GCF_002128305.1	5	5	0	5	1
d__bacteria	p__actinobacteriota	c__actinomycetia	o__streptomycetales	f__streptomycetaceae	g__streptomyces	s__Streptomyces sp002080455	GCF_002080455.1	7	7	0	7	3
d__bacteria	p__actinobacteriota	c__actinomycetia	o__streptomycetales	f__streptomycetaceae	g__streptomyces	s__Streptomyces sp001941845	GCF_001941845.1	7	7	0	7	1
d__bacteria	p__actinobacteriota	c__actinomycetia	o__streptomycetales	f__streptomycetaceae	g__streptomyces	s__Streptomyces sp001895105	GCF_018866325.1	6	6	0	6	1
d__bacteria	p__actinobacteriota	c__actinomycetia	o__streptomycetales	f__streptomycetaceae	g__streptomyces	s__Streptomyces sp001654495	GCF_001654495.1	6	6	0	6	3
d__bacteria	p__actinobacteriota	c__actinomycetia	o__streptomycetales	f__streptomycetaceae	g__streptomyces	s__Streptomyces sp001484565	GCF_001484565.1	6	6	0	6	2
d__bacteria	p__actinobacteriota	c__actinomycetia	o__streptomycetales	f__streptomycetaceae	g__streptomyces	s__Streptomyces sp000772045	GCF_000772045.1	6	6	0	6	2
d__bacteria	p__actinobacteriota	c__actinomycetia	o__streptomycetales	f__streptomycetaceae	g__streptomyces	s__Streptomyces sp000527195	GCF_008632955.1	6	6	0	6	3
d__bacteria	p__actinobacteriota	c__actinomycetia	o__streptomycetales	f__streptomycetaceae	g__streptomyces	s__Streptomyces sp000177195	GCF_000177195.2	6	6	0	6	2
d__bacteria	p__actinobacteriota	c__actinomycetia	o__streptomycetales	f__streptomycetaceae	g__streptomyces	s__Streptomyces sp000158895	GCF_003950035.1	7	7	0	7	1
d__bacteria	p__actinobacteriota	c__actinomycetia	o__streptomycetales	f__streptomycetaceae	g__streptomyces	s__Streptomyces solisilvae	GCF_015689475.1	6	6	0	6	2
d__bacteria	p__actinobacteriota	c__actinomycetia	o__streptomycetales	f__streptomycetaceae	g__streptomyces	s__Streptomyces scabiei	GCF_000091305.1	6	6	0	6	3
d__bacteria	p__actinobacteriota	c__actinomycetia	o__streptomycetales	f__streptomycetaceae	g__streptomyces	s__Streptomyces rimosus	GCF_008704655.1	7	7	0	7	3
d__bacteria	p__actinobacteriota	c__actinomycetia	o__streptomycetales	f__streptomycetaceae	g__streptomyces	s__Streptomyces qinzhouensis	GCF_007856155.1	6	6	0	6	2
d__bacteria	p__actinobacteriota	c__actinomycetia	o__streptomycetales	f__streptomycetaceae	g__streptomyces	s__Streptomyces qaidamensis	GCF_001611795.1	6	6	0	6	2
d__bacteria	p__actinobacteriota	c__actinomycetia	o__streptomycetales	f__streptomycetaceae	g__streptomyces	s__Streptomyces pristinaespiralis	GCF_001278075.1	6	6	0	6	1
d__bacteria	p__actinobacteriota	c__actinomycetia	o__streptomycetales	f__streptomycetaceae	g__streptomyces	s__Streptomyces pratensis_A	GCF_016804005.1	6	6	0	6	1
d__bacteria	p__actinobacteriota	c__actinomycetia	o__streptomycetales	f__streptomycetaceae	g__streptomyces	s__Streptomyces pluripotens	GCF_000802245.2	6	6	0	6	2
d__bacteria	p__actinobacteriota	c__actinomycetia	o__streptomycetales	f__streptomycetaceae	g__streptomyces	s__Streptomyces platensis	GCF_008704855.1	7	7	0	7	2
d__bacteria	p__actinobacteriota	c__actinomycetia	o__streptomycetales	f__streptomycetaceae	g__streptomyces	s__Streptomyces phaeolivaceus	GCF_009184865.1	6	6	0	6	1
d__bacteria	p__actinobacteriota	c__actinomycetia	o__streptomycetales	f__streptomycetaceae	g__streptomyces	s__Streptomyces paludis	GCF_003344965.1	6	6	0	6	2
d__bacteria	p__actinobacteriota	c__actinomycetia	o__streptomycetales	f__streptomycetaceae	g__streptomyces	s__Streptomyces pactum_A	GCF_002005225.1	6	6	0	6	2
d__bacteria	p__actinobacteriota	c__actinomycetia	o__streptomycetales	f__streptomycetaceae	g__streptomyces	s__Streptomyces olivoreticuli	GCF_003391135.1	7	7	0	7	1
d__bacteria	p__actinobacteriota	c__actinomycetia	o__streptomycetales	f__streptomycetaceae	g__streptomyces	s__Streptomyces nojiriensis	GCF_017639205.1	7	7	0	7	1
d__bacteria	p__actinobacteriota	c__actinomycetia	o__streptomycetales	f__streptomycetaceae	g__streptomyces	s__Streptomyces nodosus	GCF_008704995.1	6	6	0	6	1
d__bacteria	p__actinobacteriota	c__actinomycetia	o__streptomycetales	f__streptomycetaceae	g__streptomyces	s__Streptomyces niveus_A	GCF_002009175.1	6	6	0	6	1
d__bacteria	p__actinobacteriota	c__actinomycetia	o__streptomycetales	f__streptomycetaceae	g__streptomyces	s__Streptomyces nitrosporeus	GCF_008704555.1	6	6	0	6	1
d__bacteria	p__actinobacteriota	c__actinomycetia	o__streptomycetales	f__streptomycetaceae	g__streptomyces	s__Streptomyces nigra	GCF_003074055.1	6	6	0	6	2
d__bacteria	p__actinobacteriota	c__actinomycetia	o__streptomycetales	f__streptomycetaceae	g__streptomyces	s__Streptomyces mobaraensis	GCF_017916255.1	7	7	0	7	1
d__bacteria	p__actinobacteriota	c__actinomycetia	o__streptomycetales	f__streptomycetaceae	g__streptomyces	s__Streptomyces lunaelactis	GCF_003054555.1	6	6	0	6	1
d__bacteria	p__actinobacteriota	c__actinomycetia	o__streptomycetales	f__streptomycetaceae	g__streptomyces	s__Streptomyces lincolnensis	GCF_001685355.1	6	6	0	6	2
d__bacteria	p__actinobacteriota	c__actinomycetia	o__streptomycetales	f__streptomycetaceae	g__streptomyces	s__Streptomyces liangshanensis	GCF_011694815.1	6	6	0	6	3
d__bacteria	p__actinobacteriota	c__actinomycetia	o__streptomycetales	f__streptomycetaceae	g__streptomyces	s__Streptomyces leeuwenhoekii	GCF_001013905.1	6	6	0	6	1
d__bacteria	p__actinobacteriota	c__actinomycetia	o__streptomycetales	f__streptomycetaceae	g__streptomyces	s__Streptomyces lavendulae_C	GCF_002803845.1	7	7	0	7	1
d__bacteria	p__actinobacteriota	c__actinomycetia	o__streptomycetales	f__streptomycetaceae	g__streptomyces	s__Streptomyces kanamyceticus	GCF_008704495.1	6	6	0	6	2
d__bacteria	p__actinobacteriota	c__actinomycetia	o__streptomycetales	f__streptomycetaceae	g__streptomyces	s__Streptomyces hundungensis	GCF_003627815.1	8	8	0	8	2
d__bacteria	p__actinobacteriota	c__actinomycetia	o__streptomycetales	f__streptomycetaceae	g__streptomyces	s__Streptomyces hawaiiensis	GCF_004803895.1	6	6	0	6	2
d__bacteria	p__actinobacteriota	c__actinomycetia	o__streptomycetales	f__streptomycetaceae	g__streptomyces	s__Streptomyces griseoviridis_A	GCF_005222485.1	6	6	0	6	1
d__bacteria	p__actinobacteriota	c__actinomycetia	o__streptomycetales	f__streptomycetaceae	g__streptomyces	s__Streptomyces griseofuscus	GCF_014673495.1	7	7	0	7	4
d__bacteria	p__actinobacteriota	c__actinomycetia	o__streptomycetales	f__streptomycetaceae	g__streptomyces	s__Streptomyces griseochromogenes	GCF_001542625.1	6	6	0	6	2
d__bacteria	p__actinobacteriota	c__actinomycetia	o__streptomycetales	f__streptomycetaceae	g__streptomyces	s__Streptomyces globosus	GCF_003325375.1	7	7	0	7	2
d__bacteria	p__actinobacteriota	c__actinomycetia	o__streptomycetales	f__streptomycetaceae	g__streptomyces	s__Streptomyces glaucescens	GCF_000761215.1	6	6	0	6	2
d__bacteria	p__actinobacteriota	c__actinomycetia	o__streptomycetales	f__streptomycetaceae	g__streptomyces	s__Streptomyces gilvosporeus	GCF_002082195.1	6	6	0	6	2
d__bacteria	p__actinobacteriota	c__actinomycetia	o__streptomycetales	f__streptomycetaceae	g__streptomyces	s__Streptomyces fungicidicus_A	GCF_003665435.1	6	6	0	6	4
d__bacteria	p__actinobacteriota	c__actinomycetia	o__streptomycetales	f__streptomycetaceae	g__streptomyces	s__Streptomyces fradiae	GCF_008704425.1	6	6	0	6	1
d__bacteria	p__actinobacteriota	c__actinomycetia	o__streptomycetales	f__streptomycetaceae	g__streptomyces	s__Streptomyces formicae	GCF_002556545.1	6	6	0	6	2
d__bacteria	p__actinobacteriota	c__actinomycetia	o__streptomycetales	f__streptomycetaceae	g__streptomyces	s__Streptomyces fodineus	GCF_001735805.1	6	6	0	6	1
d__bacteria	p__actinobacteriota	c__actinomycetia	o__streptomycetales	f__streptomycetaceae	g__streptomyces	s__Streptomyces finlayi_A	GCF_014216315.1	6	6	0	6	1
d__bacteria	p__actinobacteriota	c__actinomycetia	o__streptomycetales	f__streptomycetaceae	g__streptomyces	s__Streptomyces ficellus	GCF_009739905.1	6	6	0	6	2
d__bacteria	p__actinobacteriota	c__actinomycetia	o__streptomycetales	f__streptomycetaceae	g__streptomyces	s__Streptomyces ferrugineus	GCF_015160855.1	6	6	0	6	2
d__bacteria	p__actinobacteriota	c__actinomycetia	o__streptomycetales	f__streptomycetaceae	g__streptomyces	s__Streptomyces fagopyri	GCF_009498275.1	6	6	0	6	3
d__bacteria	p__actinobacteriota	c__actinomycetia	o__streptomycetales	f__streptomycetaceae	g__streptomyces	s__Streptomyces exfoliatus_B	GCF_005517195.1	6	6	0	6	1
d__bacteria	p__actinobacteriota	c__actinomycetia	o__streptomycetales	f__streptomycetaceae	g__streptomyces	s__Streptomyces dengpaensis	GCF_002946835.1	6	6	0	6	1
d__bacteria	p__actinobacteriota	c__actinomycetia	o__streptomycetales	f__streptomycetaceae	g__streptomyces	s__Streptomyces cyanogenus	GCF_017526105.1	6	6	0	6	1
d__bacteria	p__actinobacteriota	c__actinomycetia	o__streptomycetales	f__streptomycetaceae	g__streptomyces	s__Streptomyces cyaneogriseus	GCF_000931445.1	6	6	0	6	1
d__bacteria	p__actinobacteriota	c__actinomycetia	o__streptomycetales	f__streptomycetaceae	g__streptomyces	s__Streptomyces cyaneochromogenes	GCF_003963535.1	6	6	0	6	2
d__bacteria	p__actinobacteriota	c__actinomycetia	o__streptomycetales	f__streptomycetaceae	g__streptomyces	s__Streptomyces collinus_A	GCF_000444875.1	6	6	0	6	2
d__bacteria	p__actinobacteriota	c__actinomycetia	o__streptomycetales	f__streptomycetaceae	g__streptomyces	s__Streptomyces coeruleorubidus	GCF_008705135.1	6	6	0	6	3
d__bacteria	p__actinobacteriota	c__actinomycetia	o__streptomycetales	f__streptomycetaceae	g__streptomyces	s__Streptomyces clavuligerus	GCF_005519465.1	6	6	0	6	1
d__bacteria	p__actinobacteriota	c__actinomycetia	o__streptomycetales	f__streptomycetaceae	g__streptomyces	s__Streptomyces chromofuscus	GCF_015160875.1	6	6	0	6	1
d__bacteria	p__actinobacteriota	c__actinomycetia	o__streptomycetales	f__streptomycetaceae	g__streptomyces	s__Streptomyces chartreusis_D	GCF_900236475.1	6	6	0	6	1
d__bacteria	p__actinobacteriota	c__actinomycetia	o__streptomycetales	f__streptomycetaceae	g__streptomyces	s__Streptomyces chartreusis	GCF_008704715.1	6	6	0	6	2
d__bacteria	p__actinobacteriota	c__actinomycetia	o__streptomycetales	f__streptomycetaceae	g__streptomyces	s__Streptomyces cattleya	GCF_000240165.1	6	6	0	6	1
d__bacteria	p__actinobacteriota	c__actinomycetia	o__streptomycetales	f__streptomycetaceae	g__streptomyces	s__Streptomyces cadmiisoli	GCF_003261055.1	6	6	0	6	2
d__bacteria	p__actinobacteriota	c__actinomycetia	o__streptomycetales	f__streptomycetaceae	g__streptomyces	s__Streptomyces cacaoi_A	GCF_013085465.1	6	6	0	6	1
d__bacteria	p__actinobacteriota	c__actinomycetia	o__streptomycetales	f__streptomycetaceae	g__streptomyces	s__Streptomyces buecherae	GCF_014295035.1	6	6	0	6	1
d__bacteria	p__actinobacteriota	c__actinomycetia	o__streptomycetales	f__streptomycetaceae	g__streptomyces	s__Streptomyces broussonetiae	GCF_009796285.1	6	6	0	6	1
d__bacteria	p__actinobacteriota	c__actinomycetia	o__streptomycetales	f__streptomycetaceae	g__streptomyces	s__Streptomyces bathyalis	GCF_015910445.1	6	6	0	6	1
d__bacteria	p__actinobacteriota	c__actinomycetia	o__streptomycetales	f__streptomycetaceae	g__streptomyces	s__Streptomyces avermitilis	GCF_000009765.2	6	6	0	6	1
d__bacteria	p__actinobacteriota	c__actinomycetia	o__streptomycetales	f__streptomycetaceae	g__streptomyces	s__Streptomyces aquilus	GCF_003955715.1	6	6	0	6	2
d__bacteria	p__actinobacteriota	c__actinomycetia	o__streptomycetales	f__streptomycetaceae	g__streptomyces	s__Streptomyces ambofaciens	GCF_001267885.1	6	6	0	6	1
d__bacteria	p__actinobacteriota	c__actinomycetia	o__streptomycetales	f__streptomycetaceae	g__streptomyces	s__Streptomyces alboniger	GCF_008704395.1	6	6	0	6	1
d__bacteria	p__actinobacteriota	c__actinomycetia	o__streptomycetales	f__streptomycetaceae	g__streptomyces	s__Streptomyces albolongus	GCF_002082585.1	6	6	0	6	2
d__bacteria	p__actinobacteriota	c__actinomycetia	o__streptomycetales	f__streptomycetaceae	g__streptomyces	s__Streptomyces albireticuli_B	GCF_002192455.1	7	7	0	7	1
d__bacteria	p__actinobacteriota	c__actinomycetia	o__streptosporangiales	f__streptosporangiaceae	g__streptomonospora	s__Streptomonospora sp004323735	GCF_004323735.1	5	5	0	5	1
d__bacteria	p__firmicutes	c__bacilli	o__lactobacillales	f__streptococcaceae	g__streptococcus	s__Streptococcus uberis	GCF_900475595.1	6	6	0	6	1
d__bacteria	p__firmicutes	c__bacilli	o__lactobacillales	f__streptococcaceae	g__streptococcus	s__Streptococcus troglodytae	GCF_002355215.1	5	5	0	5	1
d__bacteria	p__firmicutes	c__bacilli	o__lactobacillales	f__streptococcaceae	g__streptococcus	s__Streptococcus thermophilus	GCF_010120595.1	5	5	0	5	1
d__bacteria	p__firmicutes	c__bacilli	o__lactobacillales	f__streptococcaceae	g__streptococcus	s__Streptococcus suis_W	GCF_902702775.1	4	4	0	4	1
d__bacteria	p__firmicutes	c__bacilli	o__lactobacillales	f__streptococcaceae	g__streptococcus	s__Streptococcus suis	GCF_000294495.1	4	4	0	4	1
d__bacteria	p__firmicutes	c__bacilli	o__lactobacillales	f__streptococcaceae	g__streptococcus	s__Streptococcus sp018137985	GCF_018137985.1	4	4	0	4	1
d__bacteria	p__firmicutes	c__bacilli	o__lactobacillales	f__streptococcaceae	g__streptococcus	s__Streptococcus sp013623465	GCF_017639855.1	4	4	0	4	1
d__bacteria	p__firmicutes	c__bacilli	o__lactobacillales	f__streptococcaceae	g__streptococcus	s__Streptococcus sp013394695	GCF_013394695.1	4	4	0	4	1
d__bacteria	p__firmicutes	c__bacilli	o__lactobacillales	f__streptococcaceae	g__streptococcus	s__Streptococcus sp002355895	GCF_002355895.1	4	4	0	4	1
d__bacteria	p__firmicutes	c__bacilli	o__lactobacillales	f__streptococcaceae	g__streptococcus	s__Streptococcus sp001556435	GCF_009738225.1	6	6	0	6	1
d__bacteria	p__firmicutes	c__bacilli	o__lactobacillales	f__streptococcaceae	g__streptococcus	s__Streptococcus sp001553685	GCF_001553685.1	4	4	0	4	1
d__bacteria	p__firmicutes	c__bacilli	o__lactobacillales	f__streptococcaceae	g__streptococcus	s__Streptococcus sanguinis_H	GCF_013343115.1	4	4	0	4	1
d__bacteria	p__firmicutes	c__bacilli	o__lactobacillales	f__streptococcaceae	g__streptococcus	s__Streptococcus sanguinis_G	GCF_900635155.1	4	4	0	4	1
d__bacteria	p__firmicutes	c__bacilli	o__lactobacillales	f__streptococcaceae	g__streptococcus	s__Streptococcus salivarius	GCF_000785515.1	6	6	0	6	1
d__bacteria	p__firmicutes	c__bacilli	o__lactobacillales	f__streptococcaceae	g__streptococcus	s__Streptococcus ruminantium	GCF_003609975.1	4	4	0	4	1
d__bacteria	p__firmicutes	c__bacilli	o__lactobacillales	f__streptococcaceae	g__streptococcus	s__Streptococcus respiraculi	GCF_003595525.1	4	4	0	4	1
d__bacteria	p__firmicutes	c__bacilli	o__lactobacillales	f__streptococcaceae	g__streptococcus	s__Streptococcus pyogenes	GCF_002055535.1	6	6	0	6	2
d__bacteria	p__firmicutes	c__bacilli	o__lactobacillales	f__streptococcaceae	g__streptococcus	s__Streptococcus pseudopneumoniae_E	GCF_009731465.1	4	4	0	4	1
d__bacteria	p__firmicutes	c__bacilli	o__lactobacillales	f__streptococcaceae	g__streptococcus	s__Streptococcus porcinus_A	GCF_901542335.1	5	5	0	5	1
d__bacteria	p__firmicutes	c__bacilli	o__lactobacillales	f__streptococcaceae	g__streptococcus	s__Streptococcus porcinus	GCF_900475415.1	6	6	0	6	1
d__bacteria	p__firmicutes	c__bacilli	o__lactobacillales	f__streptococcaceae	g__streptococcus	s__Streptococcus pneumoniae	GCF_001457635.1	4	4	0	4	1
d__bacteria	p__firmicutes	c__bacilli	o__lactobacillales	f__streptococcaceae	g__streptococcus	s__Streptococcus pluranimalium	GCF_002953735.1	5	5	0	5	1
d__bacteria	p__firmicutes	c__bacilli	o__lactobacillales	f__streptococcaceae	g__streptococcus	s__Streptococcus parasanguinis	GCF_000164675.2	4	4	0	4	1
d__bacteria	p__firmicutes	c__bacilli	o__lactobacillales	f__streptococcaceae	g__streptococcus	s__Streptococcus pantholopis	GCF_001642085.1	5	5	0	5	1
d__bacteria	p__firmicutes	c__bacilli	o__lactobacillales	f__streptococcaceae	g__streptococcus	s__Streptococcus oralis_S	GCF_002386345.1	4	4	0	4	1
d__bacteria	p__firmicutes	c__bacilli	o__lactobacillales	f__streptococcaceae	g__streptococcus	s__Streptococcus oralis_L	GCF_000253155.1	4	4	0	4	1
d__bacteria	p__firmicutes	c__bacilli	o__lactobacillales	f__streptococcaceae	g__streptococcus	s__Streptococcus oralis_H	GCF_001983955.1	4	4	0	4	1
d__bacteria	p__firmicutes	c__bacilli	o__lactobacillales	f__streptococcaceae	g__streptococcus	s__Streptococcus oralis_F	GCF_002356415.1	4	4	0	4	1
d__bacteria	p__firmicutes	c__bacilli	o__lactobacillales	f__streptococcaceae	g__streptococcus	s__Streptococcus oralis_BO	GCF_016127915.1	4	4	0	4	1
d__bacteria	p__firmicutes	c__bacilli	o__lactobacillales	f__streptococcaceae	g__streptococcus	s__Streptococcus oralis_AC	GCF_016028255.1	4	4	0	4	1
d__bacteria	p__firmicutes	c__bacilli	o__lactobacillales	f__streptococcaceae	g__streptococcus	s__Streptococcus oralis	GCF_900637025.1	4	4	0	4	1
d__bacteria	p__firmicutes	c__bacilli	o__lactobacillales	f__streptococcaceae	g__streptococcus	s__Streptococcus mutans	GCF_006739205.1	5	5	0	5	1
d__bacteria	p__firmicutes	c__bacilli	o__lactobacillales	f__streptococcaceae	g__streptococcus	s__Streptococcus mitis_Q	GCF_001560895.1	4	4	0	4	1
d__bacteria	p__firmicutes	c__bacilli	o__lactobacillales	f__streptococcaceae	g__streptococcus	s__Streptococcus mitis_BT	GCF_016658865.1	4	4	0	4	1
d__bacteria	p__firmicutes	c__bacilli	o__lactobacillales	f__streptococcaceae	g__streptococcus	s__Streptococcus mitis_BO	GCF_013305725.1	4	4	0	4	1
d__bacteria	p__firmicutes	c__bacilli	o__lactobacillales	f__streptococcaceae	g__streptococcus	s__Streptococcus mitis_AX	GCF_007475365.1	4	4	0	4	1
d__bacteria	p__firmicutes	c__bacilli	o__lactobacillales	f__streptococcaceae	g__streptococcus	s__Streptococcus mitis_AR	GCF_000027165.1	4	4	0	4	1
d__bacteria	p__firmicutes	c__bacilli	o__lactobacillales	f__streptococcaceae	g__streptococcus	s__Streptococcus mitis_AQ	GCF_000722765.2	4	4	0	4	1
d__bacteria	p__firmicutes	c__bacilli	o__lactobacillales	f__streptococcaceae	g__streptococcus	s__Streptococcus mitis_AK	GCF_001281025.1	3	3	0	3	1
d__bacteria	p__firmicutes	c__bacilli	o__lactobacillales	f__streptococcaceae	g__streptococcus	s__Streptococcus mitis	GCF_000148585.2	4	4	0	4	1
d__bacteria	p__firmicutes	c__bacilli	o__lactobacillales	f__streptococcaceae	g__streptococcus	s__Streptococcus marmotae	GCF_001623565.1	4	4	0	4	1
d__bacteria	p__firmicutes	c__bacilli	o__lactobacillales	f__streptococcaceae	g__streptococcus	s__Streptococcus lutetiensis	GCF_900475675.1	7	7	0	7	1
d__bacteria	p__firmicutes	c__bacilli	o__lactobacillales	f__streptococcaceae	g__streptococcus	s__Streptococcus koreensis	GCF_003627135.1	4	4	0	4	1
d__bacteria	p__firmicutes	c__bacilli	o__lactobacillales	f__streptococcaceae	g__streptococcus	s__Streptococcus himalayensis	GCF_001708305.1	4	4	0	4	1
d__bacteria	p__firmicutes	c__bacilli	o__lactobacillales	f__streptococcaceae	g__streptococcus	s__Streptococcus halotolerans	GCF_001598035.1	6	6	0	6	1
d__bacteria	p__firmicutes	c__bacilli	o__lactobacillales	f__streptococcaceae	g__streptococcus	s__Streptococcus gwangjuense	GCF_003627155.1	4	4	0	4	1
d__bacteria	p__firmicutes	c__bacilli	o__lactobacillales	f__streptococcaceae	g__streptococcus	s__Streptococcus gallolyticus	GCF_002000985.1	6	6	0	6	1
d__bacteria	p__firmicutes	c__bacilli	o__lactobacillales	f__streptococcaceae	g__streptococcus	s__Streptococcus cristatus_B	GCF_000385925.1	4	4	0	4	1
d__bacteria	p__firmicutes	c__bacilli	o__lactobacillales	f__streptococcaceae	g__streptococcus	s__Streptococcus chenjunshii	GCF_003086355.1	5	5	0	5	1
d__bacteria	p__firmicutes	c__bacilli	o__lactobacillales	f__streptococcaceae	g__streptococcus	s__Streptococcus canis	GCF_900636575.1	6	6	0	6	1
d__bacteria	p__firmicutes	c__bacilli	o__lactobacillales	f__streptococcaceae	g__streptococcus	s__Streptococcus australis_A	GCF_901543175.1	4	4	0	4	1
d__bacteria	p__firmicutes	c__bacilli	o__lactobacillales	f__streptococcaceae	g__streptococcus	s__Streptococcus anginosus_C	GCF_001697145.1	4	4	0	4	1
d__bacteria	p__firmicutes	c__bacilli	o__lactobacillales	f__streptococcaceae	g__streptococcus	s__Streptococcus anginosus	GCF_900636475.1	4	4	0	4	1
d__bacteria	p__fusobacteriota	c__fusobacteriia	o__fusobacteriales	f__leptotrichiaceae	g__streptobacillus	s__Streptobacillus moniliformis	GCF_000024565.1	5	5	0	5	2
d__bacteria	p__actinobacteriota	c__actinomycetia	o__streptomycetales	f__streptomycetaceae	g__streptacidiphilus	s__Streptacidiphilus sp014084125	GCF_014084125.1	9	9	0	9	3
d__bacteria	p__actinobacteriota	c__actinomycetia	o__streptomycetales	f__streptomycetaceae	g__streptacidiphilus	s__Streptacidiphilus sp014084105	GCF_014084105.1	9	9	0	9	2
d__bacteria	p__myxococcota	c__myxococcia	o__myxococcales	f__myxococcaceae	g__stigmatella	s__Stigmatella aurantiaca_A	GCF_000165485.1	2	2	0	2	1
d__bacteria	p__proteobacteria	c__gammaproteobacteria	o__steroidobacterales	f__steroidobacteraceae	g__steroidobacter	s__Steroidobacter denitrificans	GCF_001579945.1	1	1	0	1	1
d__bacteria	p__proteobacteria	c__gammaproteobacteria	o__xanthomonadales	f__xanthomonadaceae	g__stenotrophomonas	s__Stenotrophomonas sp014621775	GCF_014621775.1	3	3	0	3	2
d__bacteria	p__proteobacteria	c__gammaproteobacteria	o__xanthomonadales	f__xanthomonadaceae	g__stenotrophomonas	s__Stenotrophomonas sp013364355	GCF_013364355.1	4	4	0	4	4
d__bacteria	p__proteobacteria	c__gammaproteobacteria	o__xanthomonadales	f__xanthomonadaceae	g__stenotrophomonas	s__Stenotrophomonas sp002192255	GCF_002192255.1	4	4	0	4	4
d__bacteria	p__proteobacteria	c__gammaproteobacteria	o__xanthomonadales	f__xanthomonadaceae	g__stenotrophomonas	s__Stenotrophomonas rhizophila_A	GCF_001704155.1	2	1	1	2	2
d__bacteria	p__proteobacteria	c__gammaproteobacteria	o__xanthomonadales	f__xanthomonadaceae	g__stenotrophomonas	s__Stenotrophomonas nitritireducens_A	GCF_001700965.1	4	4	0	4	4
d__bacteria	p__proteobacteria	c__gammaproteobacteria	o__xanthomonadales	f__xanthomonadaceae	g__stenotrophomonas	s__Stenotrophomonas maltophilia_O	GCF_006974125.1	1	1	0	1	1
d__bacteria	p__proteobacteria	c__gammaproteobacteria	o__xanthomonadales	f__xanthomonadaceae	g__stenotrophomonas	s__Stenotrophomonas maltophilia_L	GCF_000020665.1	4	4	0	4	4
d__bacteria	p__proteobacteria	c__gammaproteobacteria	o__xanthomonadales	f__xanthomonadaceae	g__stenotrophomonas	s__Stenotrophomonas maltophilia_G	GCF_002138415.1	4	4	0	4	4
d__bacteria	p__proteobacteria	c__gammaproteobacteria	o__xanthomonadales	f__xanthomonadaceae	g__stenotrophomonas	s__Stenotrophomonas maltophilia_F	GCF_000284595.1	4	4	0	4	4
d__bacteria	p__proteobacteria	c__gammaproteobacteria	o__xanthomonadales	f__xanthomonadaceae	g__stenotrophomonas	s__Stenotrophomonas maltophilia_AP	GCF_009832905.1	3	3	0	3	3
d__bacteria	p__proteobacteria	c__gammaproteobacteria	o__xanthomonadales	f__xanthomonadaceae	g__stenotrophomonas	s__Stenotrophomonas maltophilia_AO	GCF_011604605.1	3	3	0	3	3
d__bacteria	p__proteobacteria	c__gammaproteobacteria	o__xanthomonadales	f__xanthomonadaceae	g__stenotrophomonas	s__Stenotrophomonas maltophilia_AL	GCF_003205835.1	4	4	0	4	4
d__bacteria	p__proteobacteria	c__gammaproteobacteria	o__xanthomonadales	f__xanthomonadaceae	g__stenotrophomonas	s__Stenotrophomonas maltophilia_AJ	GCF_001274595.1	4	4	0	4	4
d__bacteria	p__proteobacteria	c__gammaproteobacteria	o__xanthomonadales	f__xanthomonadaceae	g__stenotrophomonas	s__Stenotrophomonas maltophilia_A	GCF_004346925.1	2	2	0	2	2
d__bacteria	p__proteobacteria	c__gammaproteobacteria	o__xanthomonadales	f__xanthomonadaceae	g__stenotrophomonas	s__Stenotrophomonas maltophilia	GCF_900186865.1	4	4	0	4	4
d__bacteria	p__proteobacteria	c__gammaproteobacteria	o__xanthomonadales	f__xanthomonadaceae	g__stenotrophomonas	s__Stenotrophomonas acidaminiphila_A	GCF_002951995.1	3	3	0	3	1
d__bacteria	p__proteobacteria	c__alphaproteobacteria	o__atcc43930	f__stellaceae	g__stella	s__Stella humosa	GCF_006738645.1	2	2	0	2	1
d__bacteria	p__proteobacteria	c__alphaproteobacteria	o__rhizobiales	f__xanthobacteraceae	g__starkeya	s__Starkeya novella	GCF_000092925.1	1	1	0	1	1
d__bacteria	p__proteobacteria	c__alphaproteobacteria	o__rhizobiales	f__stappiaceae	g__stappia	s__Stappia indica_A	GCF_009789575.1	2	2	0	2	1
d__archaea	p__thermoproteota	c__thermoproteia	o__sulfolobales	f__desulfurococcaceae	g__staphylothermus	s__Staphylothermus hellenicus	GCF_000092465.1	1	1	0	1	1
d__bacteria	p__firmicutes	c__bacilli	o__thermoactinomycetales	f__thermoactinomycetaceae	g__staphylospora	s__Staphylospora marina	GCF_003856495.1	6	6	0	6	4
d__bacteria	p__firmicutes	c__bacilli	o__staphylococcales	f__staphylococcaceae	g__staphylococcus	s__Staphylococcus xylosus_A	GCF_016774515.1	7	7	0	7	3
d__bacteria	p__firmicutes	c__bacilli	o__staphylococcales	f__staphylococcaceae	g__staphylococcus	s__Staphylococcus warneri_A	GCF_003491325.1	7	7	0	7	5
d__bacteria	p__firmicutes	c__bacilli	o__staphylococcales	f__staphylococcaceae	g__staphylococcus	s__Staphylococcus warneri	GCF_900636385.1	6	6	0	6	5
d__bacteria	p__firmicutes	c__bacilli	o__staphylococcales	f__staphylococcaceae	g__staphylococcus	s__Staphylococcus sp013463155	GCF_013463155.1	6	6	0	6	3
d__bacteria	p__firmicutes	c__bacilli	o__staphylococcales	f__staphylococcaceae	g__staphylococcus	s__Staphylococcus sp010365305	GCF_010365305.1	6	6	0	6	5
d__bacteria	p__firmicutes	c__bacilli	o__staphylococcales	f__staphylococcaceae	g__staphylococcus	s__Staphylococcus simiae_A	GCF_017357005.1	6	6	0	6	2
d__bacteria	p__firmicutes	c__bacilli	o__staphylococcales	f__staphylococcaceae	g__staphylococcus	s__Staphylococcus schleiferi	GCA_900458895.2	6	6	0	6	3
d__bacteria	p__firmicutes	c__bacilli	o__staphylococcales	f__staphylococcaceae	g__staphylococcus	s__Staphylococcus saprophyticus	GCF_000010125.1	6	6	0	6	4
d__bacteria	p__firmicutes	c__bacilli	o__staphylococcales	f__staphylococcaceae	g__staphylococcus	s__Staphylococcus piscifermentans	GCA_900186985.1	6	6	0	6	3
d__bacteria	p__firmicutes	c__bacilli	o__staphylococcales	f__staphylococcaceae	g__staphylococcus	s__Staphylococcus muscae	GCF_003019275.1	6	6	0	6	3
d__bacteria	p__firmicutes	c__bacilli	o__staphylococcales	f__staphylococcaceae	g__staphylococcus	s__Staphylococcus lutrae	GCF_002101335.1	6	6	0	6	3
d__bacteria	p__firmicutes	c__bacilli	o__staphylococcales	f__staphylococcaceae	g__staphylococcus	s__Staphylococcus lloydii	GCF_015775975.1	6	6	0	6	3
d__bacteria	p__firmicutes	c__bacilli	o__staphylococcales	f__staphylococcaceae	g__staphylococcus	s__Staphylococcus kloosii	GCF_003019255.1	7	6	1	6	3
d__bacteria	p__firmicutes	c__bacilli	o__staphylococcales	f__staphylococcaceae	g__staphylococcus	s__Staphylococcus hyicus	GCF_000816085.1	6	6	0	6	3
d__bacteria	p__firmicutes	c__bacilli	o__staphylococcales	f__staphylococcaceae	g__staphylococcus	s__Staphylococcus haemolyticus	GCF_006094395.1	6	6	0	6	2
d__bacteria	p__firmicutes	c__bacilli	o__staphylococcales	f__staphylococcaceae	g__staphylococcus	s__Staphylococcus felis	GCF_003012915.1	6	5	1	5	3
d__bacteria	p__firmicutes	c__bacilli	o__staphylococcales	f__staphylococcaceae	g__staphylococcus	s__Staphylococcus epidermidis	GCF_006742205.1	6	6	0	6	4
d__bacteria	p__firmicutes	c__bacilli	o__staphylococcales	f__staphylococcaceae	g__staphylococcus	s__Staphylococcus delphini	GCF_900636325.1	6	6	0	6	5
d__bacteria	p__firmicutes	c__bacilli	o__staphylococcales	f__staphylococcaceae	g__staphylococcus	s__Staphylococcus debuckii	GCF_003718735.1	6	6	0	6	3
d__bacteria	p__firmicutes	c__bacilli	o__staphylococcales	f__staphylococcaceae	g__staphylococcus	s__Staphylococcus condimenti	GCF_001618885.1	6	6	0	6	3
d__bacteria	p__firmicutes	c__bacilli	o__staphylococcales	f__staphylococcaceae	g__staphylococcus	s__Staphylococcus aureus	GCF_001027105.1	6	6	0	6	4
d__bacteria	p__firmicutes	c__bacilli	o__staphylococcales	f__staphylococcaceae	g__staphylococcus	s__Staphylococcus argenteus	GCF_000236925.1	5	5	0	5	4
d__bacteria	p__cyanobacteria	c__cyanobacteriia	o__cyanobacteriales	f__xenococcaceae	g__stanieria	s__Stanieria sp002355455	GCF_002355455.1	2	2	0	1	1
d__bacteria	p__cyanobacteria	c__cyanobacteriia	o__cyanobacteriales	f__xenococcaceae	g__stanieria	s__Stanieria cyanosphaera	GCF_000317575.1	2	2	0	2	1
d__bacteria	p__actinobacteriota	c__actinomycetia	o__mycobacteriales	f__micromonosporaceae	g__stackebrandtia	s__Stackebrandtia nassauensis	GCF_000024545.1	2	2	0	2	1
d__bacteria	p__planctomycetota	c__j132	o__srt547			s__SRT547 sp009002475	GCA_009002475.1	3	3	0	0	0
d__bacteria	p__firmicutes_b	c__desulfotomaculia	o__desulfotomaculales	f__desulfallaceae	g__sporotomaculum	s__Sporotomaculum gibsoniae	GCF_000233715.2	8	8	0	8	3
d__bacteria	p__firmicutes	c__bacilli	o__bacillales_a	f__planococcaceae	g__sporosarcina	s__Sporosarcina ureilytica	GCF_001753205.1	9	9	0	9	2
d__bacteria	p__firmicutes	c__bacilli	o__bacillales_a	f__planococcaceae	g__sporosarcina	s__Sporosarcina ureae_C	GCF_002109325.1	9	9	0	9	3
d__bacteria	p__firmicutes	c__bacilli	o__bacillales_a	f__planococcaceae	g__sporosarcina	s__Sporosarcina ureae_B	GCF_002101375.1	8	8	0	8	2
d__bacteria	p__firmicutes	c__bacilli	o__bacillales_a	f__planococcaceae	g__sporosarcina	s__Sporosarcina ureae_A	GCF_002082015.1	8	8	0	8	3
d__bacteria	p__firmicutes	c__bacilli	o__bacillales_a	f__planococcaceae	g__sporosarcina	s__Sporosarcina sp018309085	GCF_018309085.1	8	8	0	8	3
d__bacteria	p__firmicutes	c__bacilli	o__bacillales_a	f__planococcaceae	g__sporosarcina	s__Sporosarcina sp017498505	GCF_017498505.1	8	8	0	8	1
d__bacteria	p__firmicutes	c__bacilli	o__bacillales_a	f__planococcaceae	g__sporosarcina	s__Sporosarcina sp003351785	GCF_003351785.1	9	9	0	9	2
d__bacteria	p__firmicutes	c__bacilli	o__bacillales_a	f__planococcaceae	g__sporosarcina	s__Sporosarcina sp002077155	GCF_002077155.1	8	8	0	8	2
d__bacteria	p__firmicutes	c__bacilli	o__bacillales_a	f__planococcaceae	g__sporosarcina	s__Sporosarcina sp000829195	GCF_000829195.1	8	8	0	8	1
d__bacteria	p__firmicutes	c__bacilli	o__bacillales_a	f__planococcaceae	g__sporosarcina	s__Sporosarcina psychrophila	GCF_001590685.1	10	10	0	10	2
d__bacteria	p__firmicutes_c	c__negativicutes	o__sporomusales	f__sporomusaceae	g__sporomusa	s__Sporomusa termitida	GCF_007641255.1	12	10	2	12	4
d__bacteria	p__bacteroidota	c__bacteroidia	o__cytophagales	f__spirosomaceae	g__spirosoma	s__Spirosoma taeanense	GCF_013127955.1	4	3	1	4	3
d__bacteria	p__bacteroidota	c__bacteroidia	o__cytophagales	f__spirosomaceae	g__spirosoma	s__Spirosoma sp014117325	GCF_014117325.1	3	3	0	3	2
d__bacteria	p__bacteroidota	c__bacteroidia	o__cytophagales	f__spirosomaceae	g__spirosoma	s__Spirosoma sp013375035	GCF_013375035.1	4	4	0	4	2
d__bacteria	p__bacteroidota	c__bacteroidia	o__cytophagales	f__spirosomaceae	g__spirosoma	s__Spirosoma sp012849055	GCF_012849055.1	3	3	0	3	2
d__bacteria	p__bacteroidota	c__bacteroidia	o__cytophagales	f__spirosomaceae	g__spirosoma	s__Spirosoma sp006965485	GCF_006965485.1	3	3	0	3	2
d__bacteria	p__bacteroidota	c__bacteroidia	o__cytophagales	f__spirosomaceae	g__spirosoma	s__Spirosoma rigui	GCF_002067135.1	3	3	0	3	2
d__bacteria	p__bacteroidota	c__bacteroidia	o__cytophagales	f__spirosomaceae	g__spirosoma	s__Spirosoma radiotolerans	GCF_000974425.1	3	3	0	3	2
d__bacteria	p__bacteroidota	c__bacteroidia	o__cytophagales	f__spirosomaceae	g__spirosoma	s__Spirosoma pollinicola	GCF_002831565.1	1	1	0	1	1
d__bacteria	p__bacteroidota	c__bacteroidia	o__cytophagales	f__spirosomaceae	g__spirosoma	s__Spirosoma montaniterrae	GCF_001988955.1	3	3	0	3	2
d__bacteria	p__bacteroidota	c__bacteroidia	o__cytophagales	f__spirosomaceae	g__spirosoma	s__Spirosoma aureum	GCF_011604685.1	3	3	0	3	2
d__bacteria	p__bacteroidota	c__bacteroidia	o__cytophagales	f__spirosomaceae	g__spirosoma	s__Spirosoma aerolatum	GCF_002056795.1	3	3	0	3	2
d__bacteria	p__firmicutes	c__bacilli	o__mycoplasmatales	f__mycoplasmataceae	g__spiroplasma_b	s__Spiroplasma_B sabaudiense	GCF_000565215.1	2	2	0	2	1
d__bacteria	p__firmicutes	c__bacilli	o__mycoplasmatales	f__mycoplasmataceae	g__spiroplasma_b	s__Spiroplasma_B alleghenense	GCF_003363775.1	2	2	0	2	1
d__bacteria	p__firmicutes	c__bacilli	o__mycoplasmatales	f__mycoplasmataceae	g__spiroplasma_a	s__Spiroplasma_A turonicum	GCF_001262715.1	1	1	0	1	1
d__bacteria	p__firmicutes	c__bacilli	o__mycoplasmatales	f__mycoplasmataceae	g__spiroplasma_a	s__Spiroplasma_A taiwanense	GCF_000439435.1	1	1	0	1	1
d__bacteria	p__firmicutes	c__bacilli	o__mycoplasmatales	f__mycoplasmataceae	g__spiroplasma_a	s__Spiroplasma_A tabanidicola	GCF_009730595.1	1	1	0	1	1
d__bacteria	p__firmicutes	c__bacilli	o__mycoplasmatales	f__mycoplasmataceae	g__spiroplasma_a	s__Spiroplasma_A sp010365805	GCF_010365805.1	1	1	0	1	1
d__bacteria	p__firmicutes	c__bacilli	o__mycoplasmatales	f__mycoplasmataceae	g__spiroplasma_a	s__Spiroplasma_A sp010365785	GCF_010365785.1	1	1	0	1	1
d__bacteria	p__firmicutes	c__bacilli	o__mycoplasmatales	f__mycoplasmataceae	g__spiroplasma_a	s__Spiroplasma_A monobiae	GCF_002865545.1	1	1	0	1	1
d__bacteria	p__firmicutes	c__bacilli	o__mycoplasmatales	f__mycoplasmataceae	g__spiroplasma_a	s__Spiroplasma_A litorale	GCF_001267155.1	1	1	0	1	1
d__bacteria	p__firmicutes	c__bacilli	o__mycoplasmatales	f__mycoplasmataceae	g__spiroplasma_a	s__Spiroplasma_A helicoides	GCF_001715535.1	1	1	0	1	1
d__bacteria	p__firmicutes	c__bacilli	o__mycoplasmatales	f__mycoplasmataceae	g__spiroplasma_a	s__Spiroplasma_A gladiatoris	GCF_004379335.1	1	1	0	1	1
d__bacteria	p__firmicutes	c__bacilli	o__mycoplasmatales	f__mycoplasmataceae	g__spiroplasma_a	s__Spiroplasma_A floricola	GCF_002813555.1	1	1	0	1	1
d__bacteria	p__firmicutes	c__bacilli	o__mycoplasmatales	f__mycoplasmataceae	g__spiroplasma_a	s__Spiroplasma_A diminutum	GCF_000439455.1	1	1	0	1	1
d__bacteria	p__firmicutes	c__bacilli	o__mycoplasmatales	f__mycoplasmataceae	g__spiroplasma_a	s__Spiroplasma_A culicicola	GCF_000565175.1	1	1	0	1	1
d__bacteria	p__firmicutes	c__bacilli	o__mycoplasmatales	f__mycoplasmataceae	g__spiroplasma_a	s__Spiroplasma_A corruscae	GCF_002237575.1	1	1	0	1	1
d__bacteria	p__firmicutes	c__bacilli	o__mycoplasmatales	f__mycoplasmataceae	g__spiroplasma_a	s__Spiroplasma_A clarkii	GCF_002795265.1	2	2	0	2	1
d__bacteria	p__firmicutes	c__bacilli	o__mycoplasmatales	f__mycoplasmataceae	g__spiroplasma_a	s__Spiroplasma_A chinense	GCF_008086545.1	2	2	0	2	1
d__bacteria	p__firmicutes	c__bacilli	o__mycoplasmatales	f__mycoplasmataceae	g__spiroplasma_a	s__Spiroplasma_A cantharicola	GCF_001281045.1	1	1	0	1	1
d__bacteria	p__firmicutes	c__bacilli	o__mycoplasmatales	f__mycoplasmataceae	g__spiroplasma_a	s__Spiroplasma_A apis	GCF_000500935.1	1	1	0	1	1
d__bacteria	p__firmicutes	c__bacilli	o__mycoplasmatales	f__mycoplasmataceae	g__spiroplasma	s__Spiroplasma syrphidicola	GCF_000400955.1	1	1	0	1	1
d__bacteria	p__firmicutes	c__bacilli	o__mycoplasmatales	f__mycoplasmataceae	g__spiroplasma	s__Spiroplasma sp001886495	GCF_001886495.1	1	1	0	1	1
d__bacteria	p__firmicutes	c__bacilli	o__mycoplasmatales	f__mycoplasmataceae	g__spiroplasma	s__Spiroplasma phoeniceum	GCF_003339775.1	1	1	0	1	1
d__bacteria	p__firmicutes	c__bacilli	o__mycoplasmatales	f__mycoplasmataceae	g__spiroplasma	s__Spiroplasma mirum	GCF_000565195.1	1	1	0	1	1
d__bacteria	p__firmicutes	c__bacilli	o__mycoplasmatales	f__mycoplasmataceae	g__spiroplasma	s__Spiroplasma melliferum	GCF_005222125.1	1	1	0	1	1
d__bacteria	p__firmicutes	c__bacilli	o__mycoplasmatales	f__mycoplasmataceae	g__spiroplasma	s__Spiroplasma eriocheiris	GCF_001029265.1	1	1	0	1	1
d__bacteria	p__firmicutes	c__bacilli	o__mycoplasmatales	f__mycoplasmataceae	g__spiroplasma	s__Spiroplasma citri	GCF_001886855.1	1	1	0	1	1
d__bacteria	p__firmicutes	c__bacilli	o__mycoplasmatales	f__mycoplasmataceae	g__spiroplasma	s__Spiroplasma chrysopicola	GCF_000400935.1	1	1	0	1	1
d__bacteria	p__spirochaetota	c__spirochaetia	o__dsm-27196	f__dsm-8902	g__spirochaeta_b	s__Spirochaeta_B africana	GCF_000242595.2	3	3	0	3	1
d__bacteria	p__spirochaetota	c__spirochaetia	o__spirochaetales_a	f__spirochaetaceae_a	g__spirochaeta_a	s__Spirochaeta_A thermophila_A	GCF_000147075.1	2	2	0	2	2
d__bacteria	p__spirochaetota	c__spirochaetia	o__spirochaetales_a	f__spirochaetaceae_a	g__spirochaeta_a	s__Spirochaeta_A thermophila	GCF_000184345.1	2	2	0	2	2
d__bacteria	p__actinobacteriota	c__actinomycetia	o__streptosporangiales	f__streptosporangiaceae	g__spirillospora	s__Spirillospora sp013364275	GCF_013364275.1	5	5	0	5	1
d__bacteria	p__actinobacteriota	c__actinomycetia	o__streptosporangiales	f__streptosporangiaceae	g__spirillospora	s__Spirillospora sp008824145	GCF_008824145.1	5	5	0	5	1
d__bacteria	p__proteobacteria	c__gammaproteobacteria	o__nitrococcales	f__nitrococcaceae	g__spiribacter	s__Spiribacter sp009676705	GCF_009676705.1	1	1	0	1	1
d__bacteria	p__proteobacteria	c__gammaproteobacteria	o__nitrococcales	f__nitrococcaceae	g__spiribacter	s__Spiribacter salinus	GCF_000319575.2	1	1	0	1	1
d__bacteria	p__proteobacteria	c__gammaproteobacteria	o__nitrococcales	f__nitrococcaceae	g__spiribacter	s__Spiribacter curvatus	GCF_000485905.1	1	1	0	1	1
d__bacteria	p__proteobacteria	c__alphaproteobacteria	o__sphingomonadales	f__sphingomonadaceae	g__sphingorhabdus_b	s__Sphingorhabdus_B sp001889025	GCF_001889025.1	2	2	0	2	1
d__bacteria	p__proteobacteria	c__alphaproteobacteria	o__sphingomonadales	f__sphingomonadaceae	g__sphingopyxis	s__Sphingopyxis sp004795895	GCF_004795895.1	1	1	0	1	1
d__bacteria	p__proteobacteria	c__alphaproteobacteria	o__sphingomonadales	f__sphingomonadaceae	g__sphingopyxis	s__Sphingopyxis sp003609835	GCF_003609835.1	1	1	0	1	1
d__bacteria	p__proteobacteria	c__alphaproteobacteria	o__sphingomonadales	f__sphingomonadaceae	g__sphingopyxis	s__Sphingopyxis sp001984035	GCF_001984035.1	1	1	0	1	1
d__bacteria	p__proteobacteria	c__alphaproteobacteria	o__sphingomonadales	f__sphingomonadaceae	g__sphingopyxis	s__Sphingopyxis sp001427085	GCF_003797775.2	1	1	0	1	1
d__bacteria	p__proteobacteria	c__alphaproteobacteria	o__sphingomonadales	f__sphingomonadaceae	g__sphingopyxis	s__Sphingopyxis sp001278035	GCF_001278035.1	1	1	0	1	1
d__bacteria	p__proteobacteria	c__alphaproteobacteria	o__sphingomonadales	f__sphingomonadaceae	g__sphingopyxis	s__Sphingopyxis macrogoltabida_B	GCF_001307295.1	1	1	0	1	1
d__bacteria	p__proteobacteria	c__alphaproteobacteria	o__sphingomonadales	f__sphingomonadaceae	g__sphingopyxis	s__Sphingopyxis macrogoltabida	GCF_001314325.1	1	1	0	1	1
d__bacteria	p__proteobacteria	c__alphaproteobacteria	o__sphingomonadales	f__sphingomonadaceae	g__sphingopyxis	s__Sphingopyxis lacunae	GCF_012979535.1	1	1	0	1	1
d__bacteria	p__proteobacteria	c__alphaproteobacteria	o__sphingomonadales	f__sphingomonadaceae	g__sphingopyxis	s__Sphingopyxis fribergensis	GCF_000803645.1	1	1	0	1	1
d__bacteria	p__proteobacteria	c__alphaproteobacteria	o__sphingomonadales	f__sphingomonadaceae	g__sphingopyxis	s__Sphingopyxis alaskensis	GCF_000013985.1	1	1	0	1	1
d__bacteria	p__proteobacteria	c__alphaproteobacteria	o__sphingomonadales	f__sphingomonadaceae	g__sphingomonas_i	s__Sphingomonas_I sp013113735	GCF_013113735.1	2	2	0	2	1
d__bacteria	p__proteobacteria	c__alphaproteobacteria	o__sphingomonadales	f__sphingomonadaceae	g__sphingomonas_g	s__Sphingomonas_G sp009739515	GCF_009739515.1	2	2	0	2	1
d__bacteria	p__proteobacteria	c__alphaproteobacteria	o__sphingomonadales	f__sphingomonadaceae	g__sphingomonas_e	s__Sphingomonas_E sp002151445	GCF_002151445.1	2	2	0	2	1
d__bacteria	p__proteobacteria	c__alphaproteobacteria	o__sphingomonadales	f__sphingomonadaceae	g__sphingomonas_d	s__Sphingomonas_D sanxanigenens	GCF_000512205.2	3	3	0	3	1
d__bacteria	p__proteobacteria	c__alphaproteobacteria	o__sphingomonadales	f__sphingomonadaceae	g__sphingomonas_b	s__Sphingomonas_B sp009913435	GCF_009913435.1	2	2	0	2	1
d__bacteria	p__proteobacteria	c__alphaproteobacteria	o__sphingomonadales	f__sphingomonadaceae	g__sphingomonas	s__Sphingomonas taxi	GCF_000764535.1	2	2	0	2	1
d__bacteria	p__proteobacteria	c__alphaproteobacteria	o__sphingomonadales	f__sphingomonadaceae	g__sphingomonas	s__Sphingomonas sp016743815	GCF_016743815.1	1	1	0	1	1
d__bacteria	p__proteobacteria	c__alphaproteobacteria	o__sphingomonadales	f__sphingomonadaceae	g__sphingomonas	s__Sphingomonas sp014334115	GCF_014334115.1	1	1	0	1	1
d__bacteria	p__proteobacteria	c__alphaproteobacteria	o__sphingomonadales	f__sphingomonadaceae	g__sphingomonas	s__Sphingomonas sp014217605	GCF_014217605.1	2	2	0	2	1
d__bacteria	p__proteobacteria	c__alphaproteobacteria	o__sphingomonadales	f__sphingomonadaceae	g__sphingomonas	s__Sphingomonas sp013374115	GCF_013374115.1	4	4	0	4	1
d__bacteria	p__proteobacteria	c__alphaproteobacteria	o__sphingomonadales	f__sphingomonadaceae	g__sphingomonas	s__Sphingomonas sp013374095	GCF_013374095.1	2	2	0	2	1
d__bacteria	p__proteobacteria	c__alphaproteobacteria	o__sphingomonadales	f__sphingomonadaceae	g__sphingomonas	s__Sphingomonas sp013344685	GCF_013344685.1	2	2	0	2	1
d__bacteria	p__proteobacteria	c__alphaproteobacteria	o__sphingomonadales	f__sphingomonadaceae	g__sphingomonas	s__Sphingomonas sp011057975	GCF_011057975.1	1	1	0	1	1
d__bacteria	p__proteobacteria	c__alphaproteobacteria	o__sphingomonadales	f__sphingomonadaceae	g__sphingomonas	s__Sphingomonas sp007833215	GCF_007833215.1	1	1	0	1	1
d__bacteria	p__proteobacteria	c__alphaproteobacteria	o__sphingomonadales	f__sphingomonadaceae	g__sphingomonas	s__Sphingomonas sp004795835	GCF_004795835.1	3	3	0	3	1
d__bacteria	p__proteobacteria	c__alphaproteobacteria	o__sphingomonadales	f__sphingomonadaceae	g__sphingomonas	s__Sphingomonas sp003355005	GCF_003355005.1	2	2	0	2	1
d__bacteria	p__proteobacteria	c__alphaproteobacteria	o__sphingomonadales	f__sphingomonadaceae	g__sphingomonas	s__Sphingomonas sp002796605	GCF_002796605.1	2	2	0	2	1
d__bacteria	p__proteobacteria	c__alphaproteobacteria	o__sphingomonadales	f__sphingomonadaceae	g__sphingomonas	s__Sphingomonas sp002002925	GCF_002002925.1	2	2	0	2	1
d__bacteria	p__proteobacteria	c__alphaproteobacteria	o__sphingomonadales	f__sphingomonadaceae	g__sphingomonas	s__Sphingomonas panacisoli	GCF_007859635.1	1	0	1	1	1
d__bacteria	p__proteobacteria	c__alphaproteobacteria	o__sphingomonadales	f__sphingomonadaceae	g__sphingomonas	s__Sphingomonas panacis	GCF_001717955.1	3	3	0	3	1
d__bacteria	p__proteobacteria	c__alphaproteobacteria	o__sphingomonadales	f__sphingomonadaceae	g__sphingomonas	s__Sphingomonas insulae	GCF_010450875.1	3	3	0	3	1
d__bacteria	p__proteobacteria	c__alphaproteobacteria	o__sphingomonadales	f__sphingomonadaceae	g__sphingomonas	s__Sphingomonas hengshuiensis	GCF_000935025.1	1	1	0	1	1
d__bacteria	p__proteobacteria	c__alphaproteobacteria	o__sphingomonadales	f__sphingomonadaceae	g__sphingomonas	s__Sphingomonas alpina_A	GCF_014171475.1	1	1	0	1	1
d__bacteria	p__proteobacteria	c__alphaproteobacteria	o__sphingomonadales	f__sphingomonadaceae	g__sphingomonas	s__Sphingomonas alpina	GCF_014490665.1	1	1	0	1	1
d__bacteria	p__proteobacteria	c__alphaproteobacteria	o__sphingomonadales	f__sphingomonadaceae	g__sphingomicrobium	s__Sphingomicrobium xanthus	GCF_007998985.1	1	1	0	1	1
d__bacteria	p__proteobacteria	c__alphaproteobacteria	o__sphingomonadales	f__sphingomonadaceae	g__sphingomicrobium	s__Sphingomicrobium sp014352855	GCF_014352855.1	1	1	0	1	1
d__bacteria	p__proteobacteria	c__alphaproteobacteria	o__sphingomonadales	f__sphingomonadaceae	g__sphingomicrobium	s__Sphingomicrobium sp011301715	GCF_011301715.1	1	1	0	1	1
d__bacteria	p__proteobacteria	c__alphaproteobacteria	o__sphingomonadales	f__sphingomonadaceae	g__sphingomicrobium	s__Sphingomicrobium sinipercae	GCF_011302055.1	1	1	0	1	1
d__bacteria	p__proteobacteria	c__alphaproteobacteria	o__sphingomonadales	f__sphingomonadaceae	g__sphingomicrobium	s__Sphingomicrobium sediminicola	GCF_014489515.1	1	1	0	1	1
d__bacteria	p__proteobacteria	c__alphaproteobacteria	o__sphingomonadales	f__sphingomonadaceae	g__sphingomicrobium	s__Sphingomicrobium rhizophilum	GCF_014396585.1	1	1	0	1	1
d__bacteria	p__proteobacteria	c__alphaproteobacteria	o__sphingomonadales	f__sphingomonadaceae	g__sphingomicrobium	s__Sphingomicrobium piscis	GCF_011300455.1	1	1	0	1	1
d__bacteria	p__proteobacteria	c__alphaproteobacteria	o__sphingomonadales	f__sphingomonadaceae	g__sphingomicrobium	s__Sphingomicrobium lutea	GCF_014396785.1	1	1	0	1	1
d__bacteria	p__proteobacteria	c__alphaproteobacteria	o__sphingomonadales	f__sphingomonadaceae	g__sphingomicrobium	s__Sphingomicrobium ginsengisoli	GCF_009363895.1	1	1	0	1	1
d__bacteria	p__proteobacteria	c__alphaproteobacteria	o__sphingomonadales	f__sphingomonadaceae	g__sphingomicrobium	s__Sphingomicrobium daechungense	GCF_014489495.1	1	1	0	1	1
d__bacteria	p__proteobacteria	c__alphaproteobacteria	o__sphingomonadales	f__sphingomonadaceae	g__sphingobium	s__Sphingobium sp014280435	GCF_014280435.1	3	3	0	3	1
d__bacteria	p__proteobacteria	c__alphaproteobacteria	o__sphingomonadales	f__sphingomonadaceae	g__sphingobium	s__Sphingobium sp009720145	GCF_009720145.1	3	3	0	3	1
d__bacteria	p__proteobacteria	c__alphaproteobacteria	o__sphingomonadales	f__sphingomonadaceae	g__sphingobium	s__Sphingobium sp001713415	GCF_001713415.1	3	3	0	3	1
d__bacteria	p__proteobacteria	c__alphaproteobacteria	o__sphingomonadales	f__sphingomonadaceae	g__sphingobium	s__Sphingobium sp001658005	GCF_001658005.1	2	2	0	2	1
d__bacteria	p__proteobacteria	c__alphaproteobacteria	o__sphingomonadales	f__sphingomonadaceae	g__sphingobium	s__Sphingobium sp001563285	GCF_001563285.1	2	2	0	2	1
d__bacteria	p__proteobacteria	c__alphaproteobacteria	o__sphingomonadales	f__sphingomonadaceae	g__sphingobium	s__Sphingobium sp001563265	GCF_001563265.1	3	3	0	3	2
d__bacteria	p__proteobacteria	c__alphaproteobacteria	o__sphingomonadales	f__sphingomonadaceae	g__sphingobium	s__Sphingobium sp000283515	GCF_000283515.1	2	2	0	2	1
d__bacteria	p__proteobacteria	c__alphaproteobacteria	o__sphingomonadales	f__sphingomonadaceae	g__sphingobium	s__Sphingobium indicum	GCA_000264945.2	2	2	0	2	2
d__bacteria	p__proteobacteria	c__alphaproteobacteria	o__sphingomonadales	f__sphingomonadaceae	g__sphingobium	s__Sphingobium herbicidovorans	GCF_002080435.1	2	2	0	2	1
d__bacteria	p__proteobacteria	c__alphaproteobacteria	o__sphingomonadales	f__sphingomonadaceae	g__sphingobium	s__Sphingobium cloacae	GCF_002355855.1	2	2	0	2	1
d__bacteria	p__proteobacteria	c__alphaproteobacteria	o__sphingomonadales	f__sphingomonadaceae	g__sphingobium	s__Sphingobium baderi_A	GCF_001456115.1	2	2	0	2	1
d__bacteria	p__proteobacteria	c__alphaproteobacteria	o__sphingomonadales	f__sphingomonadaceae	g__sphingobium	s__Sphingobium amiense	GCF_003967075.1	2	2	0	2	1
d__bacteria	p__bacteroidota	c__bacteroidia	o__sphingobacteriales	f__sphingobacteriaceae	g__sphingobacterium	s__Sphingobacterium thalpophilum	GCF_901482695.1	7	7	0	7	1
d__bacteria	p__bacteroidota	c__bacteroidia	o__sphingobacteriales	f__sphingobacteriaceae	g__sphingobacterium	s__Sphingobacterium spiritivorum_A	GCF_016724845.1	4	4	0	4	1
d__bacteria	p__bacteroidota	c__bacteroidia	o__sphingobacteriales	f__sphingobacteriaceae	g__sphingobacterium	s__Sphingobacterium sp009557615	GCF_009557615.1	4	4	0	4	1
d__bacteria	p__bacteroidota	c__bacteroidia	o__sphingobacteriales	f__sphingobacteriaceae	g__sphingobacterium	s__Sphingobacterium sp002734245	GCF_004526235.1	2	2	0	2	1
d__bacteria	p__bacteroidota	c__bacteroidia	o__sphingobacteriales	f__sphingobacteriaceae	g__sphingobacterium	s__Sphingobacterium sp002418355	GCF_016725325.1	4	4	0	4	1
d__bacteria	p__bacteroidota	c__bacteroidia	o__sphingobacteriales	f__sphingobacteriaceae	g__sphingobacterium	s__Sphingobacterium sp000747525	GCF_000747525.1	8	8	0	8	1
d__bacteria	p__bacteroidota	c__bacteroidia	o__sphingobacteriales	f__sphingobacteriaceae	g__sphingobacterium	s__Sphingobacterium mizutaii	GCF_900187125.1	4	0	4	4	1
d__bacteria	p__bacteroidota	c__bacteroidia	o__sphingobacteriales	f__sphingobacteriaceae	g__sphingobacterium	s__Sphingobacterium lactis	GCF_011046555.1	4	4	0	4	1
d__bacteria	p__bacteroidota	c__bacteroidia	o__sphingobacteriales	f__sphingobacteriaceae	g__sphingobacterium	s__Sphingobacterium hotanense	GCF_008274825.1	4	4	0	4	1
d__bacteria	p__bacteroidota	c__bacteroidia	o__sphingobacteriales	f__sphingobacteriaceae	g__sphingobacterium	s__Sphingobacterium daejeonense	GCF_901472535.1	4	2	2	4	1
d__bacteria	p__proteobacteria	c__gammaproteobacteria	o__burkholderiales	f__burkholderiaceae	g__sphaerotilus	s__Sphaerotilus sulfidivorans	GCF_008329925.1	4	4	0	4	1
d__bacteria	p__spirochaetota	c__spirochaetia	o__sphaerochaetales	f__sphaerochaetaceae	g__sphaerochaeta_a	s__Sphaerochaeta_A coccoides	GCF_000208385.1	3	3	0	3	2
d__bacteria	p__spirochaetota	c__spirochaetia	o__sphaerochaetales	f__sphaerochaetaceae	g__sphaerochaeta	s__Sphaerochaeta pleomorpha	GCF_000236685.1	4	4	0	4	2
d__bacteria	p__spirochaetota	c__spirochaetia	o__sphaerochaetales	f__sphaerochaetaceae	g__sphaerochaeta	s__Sphaerochaeta globosa	GCF_000190435.1	4	4	0	4	3
d__bacteria	p__chloroflexota	c__chloroflexia	o__thermomicrobiales	f__thermomicrobiaceae	g__sphaerobacter	s__Sphaerobacter thermophilus	GCF_000024985.1	2	2	0	2	2
d__bacteria	p__actinobacteriota	c__actinomycetia	o__actinomycetales	f__micrococcaceae	g__specibacter	s__Specibacter sp001281315	GCF_001281315.1	6	6	0	6	1
d__bacteria	p__actinobacteriota	c__actinomycetia	o__actinomycetales	f__micrococcaceae	g__specibacter	s__Specibacter sp000785535	GCF_000785535.1	6	6	0	6	1
d__bacteria	p__actinobacteriota	c__actinomycetia	o__actinomycetales	f__micrococcaceae	g__specibacter	s__Specibacter dokdonellae	GCF_003268655.1	5	5	0	5	1
d__bacteria	p__actinobacteriota	c__actinomycetia	o__actinomycetales	f__micrococcaceae	g__specibacter	s__Specibacter alpinus_C	GCF_001445575.1	8	8	0	8	1
d__bacteria	p__actinobacteriota	c__actinomycetia	o__actinomycetales	f__micrococcaceae	g__specibacter	s__Specibacter alpinus_A	GCF_001294625.1	6	6	0	6	1
d__bacteria	p__proteobacteria	c__gammaproteobacteria	o__pseudomonadales	f__zooshikellaceae	g__spartinivicinus	s__Spartinivicinus ruber	GCF_011009015.1	4	4	0	4	1
d__bacteria	p__myxococcota	c__polyangia	o__polyangiales	f__polyangiaceae	g__sorangium	s__Sorangium cellulosum_F	GCF_004135735.1	4	4	0	4	3
d__bacteria	p__myxococcota	c__polyangia	o__polyangiales	f__polyangiaceae	g__sorangium	s__Sorangium cellulosum_E	GCF_002950945.1	4	4	0	4	3
d__bacteria	p__myxococcota	c__polyangia	o__polyangiales	f__polyangiaceae	g__sorangium	s__Sorangium cellulosum_D	GCF_000418325.1	4	4	0	4	3
d__bacteria	p__myxococcota	c__polyangia	o__polyangiales	f__polyangiaceae	g__sorangium	s__Sorangium cellulosum_B	GCF_000067165.1	4	4	0	4	3
d__bacteria	p__bacteroidota	c__bacteroidia	o__flavobacteriales	f__weeksellaceae	g__soonwooa	s__Soonwooa sp011058315	GCF_011058315.1	5	5	0	5	1
d__bacteria	p__bacteroidota	c__bacteroidia	o__sphingobacteriales	f__sphingobacteriaceae	g__solitalea	s__Solitalea canadensis	GCF_000242635.2	4	4	0	4	1
d__bacteria	p__bacteroidota	c__bacteroidia	o__cytophagales	f__hymenobacteraceae	g__solirubrum	s__Solirubrum oligotrophum	GCF_003574965.1	4	4	0	4	2
d__bacteria	p__proteobacteria	c__gammaproteobacteria	o__nevskiales	f__nevskiaceae	g__solimonas_a	s__Solimonas_A sp003428335	GCF_003428335.1	2	2	0	2	1
d__bacteria	p__desulfobacterota_i	c__desulfovibrionia	o__desulfovibrionales	f__desulfovibrionaceae	g__solidesulfovibrio	s__Solidesulfovibrio magneticus	GCF_000010665.1	3	3	0	3	1
d__bacteria	p__desulfobacterota_i	c__desulfovibrionia	o__desulfovibrionales	f__desulfovibrionaceae	g__solidesulfovibrio	s__Solidesulfovibrio carbinolicus	GCF_004135975.1	3	3	0	3	1
d__bacteria	p__firmicutes_a	c__clostridia	o__oscillospirales	f__acutalibacteraceae	g__solibaculum	s__Solibaculum mannosilyticum	GCF_015140235.1	3	3	0	3	1
d__bacteria	p__firmicutes	c__bacilli	o__bacillales_a	f__planococcaceae	g__solibacillus	s__Solibacillus sp003073375	GCF_003073375.1	14	14	0	14	3
d__bacteria	p__firmicutes	c__bacilli	o__bacillales_a	f__planococcaceae	g__solibacillus	s__Solibacillus sp002736105	GCF_002736105.1	12	12	0	12	2
d__bacteria	p__proteobacteria	c__gammaproteobacteria	o__enterobacterales	f__enterobacteriaceae	g__sodalis_a	s__Sodalis_A praecaptivus	GCF_000517425.1	7	7	0	7	3
d__bacteria	p__proteobacteria	c__gammaproteobacteria	o__enterobacterales	f__enterobacteriaceae	g__sodalis_a	s__Sodalis_A pierantonius	GCF_000517405.1	5	5	0	5	4
d__bacteria	p__proteobacteria	c__gammaproteobacteria	o__enterobacterales	f__enterobacteriaceae	g__sodalis	s__Sodalis glossinidius	GCA_000010085.1	7	7	0	7	2
d__bacteria	p__bacteroidota	c__bacteroidia	o__bacteroidales	f__muribaculaceae	g__sodaliphilus	s__Sodaliphilus pleomorphus	GCF_009676955.1	4	4	0	4	2
d__bacteria	p__firmicutes	c__bacilli	o__alicyclobacillales	f__alicyclobacillaceae	g__so9	s__SO9 sp016406125	GCF_016406125.1	7	7	0	7	2
d__bacteria	p__proteobacteria	c__gammaproteobacteria	o__burkholderiales	f__neisseriaceae	g__snodgrassella	s__Snodgrassella alvi	GCF_000600005.1	4	4	0	4	1
d__bacteria	p__fusobacteriota	c__fusobacteriia	o__fusobacteriales	f__leptotrichiaceae	g__sneathia	s__Sneathia vaginalis	GCF_000973085.1	3	3	0	3	1
d__bacteria	p__actinobacteriota	c__actinomycetia	o__mycobacteriales	f__micromonosporaceae	g__slsw01	s__SLSW01 sp016925615	GCA_016925615.1	2	2	0	2	1
d__bacteria	p__actinobacteriota	c__coriobacteriia	o__coriobacteriales	f__eggerthellaceae	g__slackia	s__Slackia heliotrinireducens	GCF_000023885.1	2	2	0	2	1
d__bacteria	p__firmicutes	c__bacilli	o__tumebacillales	f__effusibacillaceae	g__skt53	s__SkT53 sp015097055	GCF_015097055.1	9	9	0	9	2
d__bacteria	p__proteobacteria	c__alphaproteobacteria	o__azospirillales	f__azospirillaceae	g__skermanella	s__Skermanella sp016653635	GCF_016653635.2	7	7	0	7	1
d__bacteria	p__proteobacteria	c__alphaproteobacteria	o__azospirillales	f__azospirillaceae	g__skermanella	s__Skermanella pratensis	GCF_008843145.1	6	6	0	6	1
d__bacteria	p__proteobacteria	c__alphaproteobacteria	o__rhizobiales	f__rhizobiaceae	g__sinorhizobium	s__Sinorhizobium sojae	GCF_002288525.1	3	3	0	3	1
d__bacteria	p__proteobacteria	c__alphaproteobacteria	o__rhizobiales	f__rhizobiaceae	g__sinorhizobium	s__Sinorhizobium mexicanum	GCF_013488225.1	3	3	0	3	1
d__bacteria	p__proteobacteria	c__alphaproteobacteria	o__rhizobiales	f__rhizobiaceae	g__sinorhizobium	s__Sinorhizobium fredii_C	GCF_002944405.1	3	3	0	3	1
d__bacteria	p__proteobacteria	c__alphaproteobacteria	o__rhizobiales	f__rhizobiaceae	g__sinorhizobium	s__Sinorhizobium alkalisoli	GCF_008932245.1	3	3	0	3	1
d__bacteria	p__actinobacteriota	c__actinomycetia	o__actinomycetales	f__micrococcaceae	g__sinomonas	s__Sinomonas atrocyanea	GCF_001577305.1	4	4	0	4	1
d__bacteria	p__proteobacteria	c__gammaproteobacteria	o__nevskiales	f__nevskiaceae	g__sinimarinibacterium	s__Sinimarinibacterium sp010092425	GCF_010092425.1	2	2	0	2	1
d__bacteria	p__planctomycetota	c__planctomycetia	o__isosphaerales	f__isosphaeraceae	g__singulisphaera	s__Singulisphaera acidiphila	GCF_000242455.2	8	8	0	8	1
d__bacteria	p__proteobacteria	c__gammaproteobacteria	o__burkholderiales	f__neisseriaceae	g__simonsiella	s__Simonsiella muelleri	GCF_002951835.1	5	5	0	5	1
d__bacteria	p__chlamydiota	c__chlamydiia	o__chlamydiales	f__simkaniaceae	g__simkania	s__Simkania negevensis	GCF_000237205.1	1	1	0	1	1
d__bacteria	p__proteobacteria	c__gammaproteobacteria	o__pseudomonadales	f__cellvibrionaceae	g__simiduia	s__Simiduia agarivorans	GCF_000305785.2	3	3	0	3	1
d__bacteria	p__proteobacteria	c__gammaproteobacteria	o__burkholderiales	f__gallionellaceae	g__sideroxydans	s__Sideroxydans lithotrophicus	GCF_000025705.1	2	2	0	2	1
d__bacteria	p__bacteroidota	c__bacteroidia	o__flavobacteriales	f__flavobacteriaceae	g__siansivirga	s__Siansivirga zeaxanthinifaciens	GCF_000941055.1	3	3	0	3	1
d__bacteria	p__proteobacteria	c__alphaproteobacteria	o__rhizobiales	f__rhizobiaceae	g__shinella	s__Shinella sp016839145	GCF_016839145.1	3	3	0	3	1
d__bacteria	p__proteobacteria	c__gammaproteobacteria	o__enterobacterales	f__enterobacteriaceae	g__shimwellia	s__Shimwellia blattae	GCF_000262305.1	8	8	0	8	2
d__bacteria	p__proteobacteria	c__gammaproteobacteria	o__enterobacterales	f__shewanellaceae	g__shewanella	s__Shewanella woodyi	GCF_000019525.1	10	10	0	10	2
d__bacteria	p__proteobacteria	c__gammaproteobacteria	o__enterobacterales	f__shewanellaceae	g__shewanella	s__Shewanella violacea	GCF_000091325.1	14	14	0	14	4
d__bacteria	p__proteobacteria	c__gammaproteobacteria	o__enterobacterales	f__shewanellaceae	g__shewanella	s__Shewanella sp018223345	GCF_018223345.1	7	7	0	7	2
d__bacteria	p__proteobacteria	c__gammaproteobacteria	o__enterobacterales	f__shewanellaceae	g__shewanella	s__Shewanella sp017354985	GCF_017354985.1	8	8	0	8	3
d__bacteria	p__proteobacteria	c__gammaproteobacteria	o__enterobacterales	f__shewanellaceae	g__shewanella	s__Shewanella sp017354945	GCF_017354945.1	7	7	0	7	1
d__bacteria	p__proteobacteria	c__gammaproteobacteria	o__enterobacterales	f__shewanellaceae	g__shewanella	s__Shewanella sp016757755	GCF_016757755.1	10	10	0	10	1
d__bacteria	p__proteobacteria	c__gammaproteobacteria	o__enterobacterales	f__shewanellaceae	g__shewanella	s__Shewanella sp007197555	GCF_007197555.1	12	12	0	12	3
d__bacteria	p__proteobacteria	c__gammaproteobacteria	o__enterobacterales	f__shewanellaceae	g__shewanella	s__Shewanella sp006494715	GCF_006494715.1	15	15	0	15	2
d__bacteria	p__proteobacteria	c__gammaproteobacteria	o__enterobacterales	f__shewanellaceae	g__shewanella	s__Shewanella sp002966515	GCF_002966515.1	10	10	0	10	4
d__bacteria	p__proteobacteria	c__gammaproteobacteria	o__enterobacterales	f__shewanellaceae	g__shewanella	s__Shewanella sp002838165	GCF_002838165.1	10	10	0	10	3
d__bacteria	p__proteobacteria	c__gammaproteobacteria	o__enterobacterales	f__shewanellaceae	g__shewanella	s__Shewanella sp002836315	GCF_010092445.1	11	11	0	11	2
d__bacteria	p__proteobacteria	c__gammaproteobacteria	o__enterobacterales	f__shewanellaceae	g__shewanella	s__Shewanella sp000203935	GCF_000203935.1	9	9	0	9	4
d__bacteria	p__proteobacteria	c__gammaproteobacteria	o__enterobacterales	f__shewanellaceae	g__shewanella	s__Shewanella sediminis	GCF_000018025.1	12	12	0	12	4
d__bacteria	p__proteobacteria	c__gammaproteobacteria	o__enterobacterales	f__shewanellaceae	g__shewanella	s__Shewanella putrefaciens_C	GCF_016406305.1	9	9	0	9	3
d__bacteria	p__proteobacteria	c__gammaproteobacteria	o__enterobacterales	f__shewanellaceae	g__shewanella	s__Shewanella putrefaciens	GCF_016406325.1	8	8	0	8	3
d__bacteria	p__proteobacteria	c__gammaproteobacteria	o__enterobacterales	f__shewanellaceae	g__shewanella	s__Shewanella psychrophila	GCF_002005305.1	9	9	0	9	3
d__bacteria	p__proteobacteria	c__gammaproteobacteria	o__enterobacterales	f__shewanellaceae	g__shewanella	s__Shewanella polaris	GCF_006385555.1	8	8	0	8	2
d__bacteria	p__proteobacteria	c__gammaproteobacteria	o__enterobacterales	f__shewanellaceae	g__shewanella	s__Shewanella piezotolerans	GCF_000014885.1	8	8	0	8	1
d__bacteria	p__proteobacteria	c__gammaproteobacteria	o__enterobacterales	f__shewanellaceae	g__shewanella	s__Shewanella pealeana	GCF_000018285.1	11	11	0	11	2
d__bacteria	p__proteobacteria	c__gammaproteobacteria	o__enterobacterales	f__shewanellaceae	g__shewanella	s__Shewanella oneidensis	GCF_000146165.2	9	9	0	9	2
d__bacteria	p__proteobacteria	c__gammaproteobacteria	o__enterobacterales	f__shewanellaceae	g__shewanella	s__Shewanella maritima	GCF_004295345.1	8	8	0	8	2
d__bacteria	p__proteobacteria	c__gammaproteobacteria	o__enterobacterales	f__shewanellaceae	g__shewanella	s__Shewanella marisflavi	GCF_002215585.1	8	8	0	8	3
d__bacteria	p__proteobacteria	c__gammaproteobacteria	o__enterobacterales	f__shewanellaceae	g__shewanella	s__Shewanella loihica	GCF_000016065.1	8	8	0	8	3
d__bacteria	p__proteobacteria	c__gammaproteobacteria	o__enterobacterales	f__shewanellaceae	g__shewanella	s__Shewanella livingstonensis	GCF_003855395.1	8	8	0	8	1
d__bacteria	p__proteobacteria	c__gammaproteobacteria	o__enterobacterales	f__shewanellaceae	g__shewanella	s__Shewanella litorisediminis	GCF_016834455.1	8	8	0	8	4
d__bacteria	p__proteobacteria	c__gammaproteobacteria	o__enterobacterales	f__shewanellaceae	g__shewanella	s__Shewanella khirikhana	GCF_003957745.1	8	8	0	8	3
d__bacteria	p__proteobacteria	c__gammaproteobacteria	o__enterobacterales	f__shewanellaceae	g__shewanella	s__Shewanella japonica	GCF_002075795.1	8	8	0	8	2
d__bacteria	p__proteobacteria	c__gammaproteobacteria	o__enterobacterales	f__shewanellaceae	g__shewanella	s__Shewanella halifaxensis	GCF_000019185.1	10	10	0	10	2
d__bacteria	p__proteobacteria	c__gammaproteobacteria	o__enterobacterales	f__shewanellaceae	g__shewanella	s__Shewanella donghaensis	GCF_007567505.1	10	10	0	10	2
d__bacteria	p__proteobacteria	c__gammaproteobacteria	o__enterobacterales	f__shewanellaceae	g__shewanella	s__Shewanella dokdonensis	GCF_018394335.1	7	7	0	7	2
d__bacteria	p__proteobacteria	c__gammaproteobacteria	o__enterobacterales	f__shewanellaceae	g__shewanella	s__Shewanella denitrificans	GCF_000013765.1	8	8	0	8	3
d__bacteria	p__proteobacteria	c__gammaproteobacteria	o__enterobacterales	f__shewanellaceae	g__shewanella	s__Shewanella bicestrii	GCF_002216875.1	9	9	0	9	3
d__bacteria	p__proteobacteria	c__gammaproteobacteria	o__enterobacterales	f__shewanellaceae	g__shewanella	s__Shewanella amazonensis	GCF_000015245.1	8	8	0	8	2
d__bacteria	p__proteobacteria	c__gammaproteobacteria	o__enterobacterales	f__shewanellaceae	g__shewanella	s__Shewanella algae	GCF_009183365.2	8	8	0	8	3
d__bacteria	p__proteobacteria	c__gammaproteobacteria	o__enterobacterales	f__shewanellaceae	g__shewanella	s__Shewanella aestuarii_A	GCF_011765625.1	8	8	0	8	2
d__bacteria	p__proteobacteria	c__gammaproteobacteria	o__enterobacterales	f__enterobacteriaceae	g__serratia_f	s__Serratia_F odorifera	GCF_900635445.1	7	7	0	7	2
d__bacteria	p__proteobacteria	c__gammaproteobacteria	o__enterobacterales	f__enterobacteriaceae	g__serratia_b	s__Serratia_B rhizosphaerae	GCF_009817885.1	7	7	0	7	2
d__bacteria	p__proteobacteria	c__gammaproteobacteria	o__enterobacterales	f__enterobacteriaceae	g__serratia_a	s__Serratia_A fonticola	GCF_001006005.1	7	7	0	7	3
d__bacteria	p__proteobacteria	c__gammaproteobacteria	o__enterobacterales	f__enterobacteriaceae	g__serratia	s__Serratia symbiotica	GCF_000821185.2	7	7	0	7	1
d__bacteria	p__proteobacteria	c__gammaproteobacteria	o__enterobacterales	f__enterobacteriaceae	g__serratia	s__Serratia surfactantfaciens	GCF_001642805.2	6	6	0	6	2
d__bacteria	p__proteobacteria	c__gammaproteobacteria	o__enterobacterales	f__enterobacteriaceae	g__serratia	s__Serratia sp003812745	GCF_003812745.1	7	7	0	7	2
d__bacteria	p__proteobacteria	c__gammaproteobacteria	o__enterobacterales	f__enterobacteriaceae	g__serratia	s__Serratia plymuthica_B	GCF_018336935.1	7	7	0	7	2
d__bacteria	p__proteobacteria	c__gammaproteobacteria	o__enterobacterales	f__enterobacteriaceae	g__serratia	s__Serratia marcescens_K	GCF_002220655.1	7	7	0	7	2
d__bacteria	p__proteobacteria	c__gammaproteobacteria	o__enterobacterales	f__enterobacteriaceae	g__serratia	s__Serratia marcescens	GCF_017299535.1	7	7	0	7	2
d__bacteria	p__proteobacteria	c__gammaproteobacteria	o__enterobacterales	f__enterobacteriaceae	g__serratia	s__Serratia liquefaciens	GCF_000422085.1	7	7	0	7	2
d__bacteria	p__proteobacteria	c__gammaproteobacteria	o__enterobacterales	f__enterobacteriaceae	g__serratia	s__Serratia ficaria	GCF_900187015.1	7	7	0	7	2
d__bacteria	p__proteobacteria	c__gammaproteobacteria	o__enterobacterales	f__enterobacteriaceae	g__serratia	s__Serratia bockelmannii	GCF_000513215.1	7	7	0	7	2
d__bacteria	p__proteobacteria	c__gammaproteobacteria	o__burkholderiales	f__burkholderiaceae	g__serpentinomonas	s__Serpentinomonas raichei	GCF_000828895.1	2	2	0	2	1
d__bacteria	p__proteobacteria	c__gammaproteobacteria	o__burkholderiales	f__burkholderiaceae	g__serpentinomonas	s__Serpentinomonas mccroryi	GCF_000828915.1	2	2	0	2	1
d__bacteria	p__actinobacteriota	c__actinomycetia	o__actinomycetales	f__dermatophilaceae	g__serinicoccus	s__Serinicoccus sp004322775	GCF_004322775.1	2	2	0	2	1
d__bacteria	p__actinobacteriota	c__actinomycetia	o__actinomycetales	f__dermatophilaceae	g__serinicoccus	s__Serinicoccus profundi	GCF_008001015.1	2	2	0	2	1
d__bacteria	p__actinobacteriota	c__actinomycetia	o__actinomycetales	f__dermatophilaceae	g__serinicoccus	s__Serinicoccus pratense	GCF_008843165.1	2	2	0	2	1
d__bacteria	p__actinobacteriota	c__actinomycetia	o__actinomycetales	f__dermatophilaceae	g__serinicoccus	s__Serinicoccus marinus	GCF_008386315.1	2	2	0	2	1
d__bacteria	p__actinobacteriota	c__actinomycetia	o__actinomycetales	f__dermatophilaceae	g__serinicoccus	s__Serinicoccus hydrothermalis	GCF_001685415.1	2	2	0	2	1
d__bacteria	p__actinobacteriota	c__actinomycetia	o__actinomycetales	f__dermatophilaceae	g__serinicoccus	s__Serinicoccus flavus	GCF_004526345.1	2	2	0	2	1
d__bacteria	p__actinobacteriota	c__actinomycetia	o__actinomycetales	f__dermatophilaceae	g__serinicoccus	s__Serinicoccus chungangensis	GCF_006337125.1	2	2	0	2	1
d__bacteria	p__bacteroidota	c__bacteroidia	o__flavobacteriales	f__flavobacteriaceae	g__seonamhaeicola	s__Seonamhaeicola sp001971785	GCF_001971785.1	2	2	0	2	1
d__bacteria	p__firmicutes_c	c__negativicutes	o__selenomonadales	f__selenomonadaceae	g__selenomonas_a	s__Selenomonas_A lactilytica	GCF_000284095.1	7	7	0	7	1
d__bacteria	p__firmicutes_c	c__negativicutes	o__selenomonadales	f__selenomonadaceae	g__selenomonas	s__Selenomonas sputigena	GCF_000208405.1	4	4	0	4	1
d__bacteria	p__actinobacteriota	c__actinomycetia	o__mycobacteriales	f__mycobacteriaceae	g__segniliparus	s__Segniliparus rotundus	GCF_000092825.1	1	1	0	1	1
d__bacteria	p__spirochaetota	c__spirochaetia	o__dsm-16054	f__sediminispirochaetaceae	g__sediminispirochaeta	s__Sediminispirochaeta smaragdinae	GCF_000143985.1	2	2	0	2	1
d__bacteria	p__bacteroidota	c__bacteroidia	o__flavobacteriales	f__flavobacteriaceae	g__sediminicola	s__Sediminicola sp001430825	GCF_001430825.1	3	3	0	3	2
d__bacteria	p__firmicutes	c__bacilli	o__bacillales_d	f__amphibacillaceae	g__sediminibacillus	s__Sediminibacillus sp017792025	GCF_017792025.1	9	9	0	9	5
d__bacteria	p__planctomycetota	c__phycisphaerae	o__sedimentisphaerales	f__sedimentisphaeraceae	g__sedimentisphaera	s__Sedimentisphaera salicampi	GCF_002117005.1	3	3	0	3	1
d__bacteria	p__planctomycetota	c__phycisphaerae	o__sedimentisphaerales	f__sedimentisphaeraceae	g__sedimentisphaera	s__Sedimentisphaera cyanobacteriorum	GCF_001997385.1	3	3	0	3	1
d__bacteria	p__proteobacteria	c__gammaproteobacteria	o__chromatiales	f__sedimenticolaceae	g__sedimenticola	s__Sedimenticola thiotaurini	GCF_001007875.1	2	2	0	2	1
d__bacteria	p__fusobacteriota	c__fusobacteriia	o__fusobacteriales	f__leptotrichiaceae	g__sebaldella	s__Sebaldella termitidis	GCF_000024405.1	4	4	0	4	2
d__bacteria	p__actinobacteriota	c__actinomycetia	o__streptomycetales	f__streptomycetaceae	g__scut-3	s__SCUT-3 sp014083985	GCF_014083985.1	7	7	0	7	1
d__bacteria	p__actinobacteriota	c__rubrobacteria	o__rubrobacterales	f__rubrobacteraceae	g__scsio-52915	s__SCSIO-52915 sp011492965	GCF_011492965.1	1	1	0	1	1
d__bacteria	p__actinobacteriota	c__rubrobacteria	o__rubrobacterales	f__rubrobacteraceae	g__scsio-52909	s__SCSIO-52909 sp011492945	GCF_011492945.1	1	1	0	1	1
d__bacteria	p__firmicutes	c__bacilli	o__brevibacillales	f__brevibacillaceae	g__scsio-07484	s__SCSIO-07484 sp003963515	GCF_003963515.1	7	7	0	7	4
d__bacteria	p__actinobacteriota	c__actinomycetia	o__actinomycetales	f__actinomycetaceae	g__scrofimicrobium	s__Scrofimicrobium sp014069575	GCF_014069575.1	2	2	0	2	1
d__bacteria	p__proteobacteria	c__gammaproteobacteria	o__burkholderiales	f__burkholderiaceae	g__schlegelella	s__Schlegelella thermodepolymerans	GCF_015476235.1	2	2	0	2	1
d__bacteria	p__firmicutes_a	c__clostridia	o__lachnospirales	f__lachnospiraceae	g__scatomonas	s__Scatomonas sp003481995	GCA_014337215.1	4	4	0	4	1
d__bacteria	p__actinobacteriota	c__actinomycetia	o__actinomycetales	f__bifidobacteriaceae	g__scardovia	s__Scardovia inopinata	GCF_001042695.1	2	2	0	2	1
d__bacteria	p__proteobacteria	c__gammaproteobacteria	o__enterobacterales	f__enterobacteriaceae	g__scandinavium	s__Scandinavium goeteborgense	GCF_003935895.2	7	7	0	7	3
d__bacteria	p__bacteroidota	c__bacteroidia	o__chitinophagales	f__saprospiraceae	g__saprospira	s__Saprospira grandis_B	GCF_000250635.1	3	3	0	3	1
d__bacteria	p__actinobacteriota	c__actinomycetia	o__actinomycetales	f__cellulomonadaceae	g__sanguibacter	s__Sanguibacter keddieii	GCF_000024925.1	4	4	0	4	1
d__bacteria	p__myxococcota	c__polyangia	o__polyangiales	f__sandaracinaceae	g__sandaracinus	s__Sandaracinus amylolyticus	GCF_000737325.1	2	2	0	2	1
d__bacteria	p__proteobacteria	c__gammaproteobacteria	o__enterobacterales	f__enterobacteriaceae	g__salmonella	s__Salmonella enterica	GCF_000006945.2	7	7	0	7	3
d__bacteria	p__proteobacteria	c__gammaproteobacteria	o__enterobacterales	f__enterobacteriaceae	g__salmonella	s__Salmonella bongori	GCF_000252995.1	7	7	0	7	3
d__bacteria	p__firmicutes	c__bacilli	o__bacillales_h	f__salisediminibacteriaceae	g__salisediminibacterium	s__Salisediminibacterium selenitireducens	GCA_000093085.1	7	7	0	7	7
d__bacteria	p__firmicutes	c__bacilli	o__bacillales_h	f__salisediminibacteriaceae	g__salisediminibacterium	s__Salisediminibacterium beveridgei	GCF_001721685.1	7	7	0	7	1
d__bacteria	p__proteobacteria	c__alphaproteobacteria	o__rhodobacterales	f__rhodobacteraceae	g__salipiger	s__Salipiger sp001687105	GCF_001687105.1	5	5	0	5	1
d__bacteria	p__proteobacteria	c__alphaproteobacteria	o__rhodobacterales	f__rhodobacteraceae	g__salipiger	s__Salipiger profundus	GCF_001969385.1	4	4	0	4	1
d__bacteria	p__proteobacteria	c__alphaproteobacteria	o__rhodobacterales	f__rhodobacteraceae	g__salipiger	s__Salipiger pacificus_A	GCF_003111685.1	5	5	0	5	1
d__bacteria	p__proteobacteria	c__alphaproteobacteria	o__rhodobacterales	f__rhodobacteraceae	g__salipiger	s__Salipiger abyssi	GCF_001975705.1	2	2	0	2	1
d__bacteria	p__bacteroidota	c__bacteroidia	o__bacteroidales	f__salinivirgaceae	g__salinivirga	s__Salinivirga cyanobacteriivorans	GCF_001443605.1	3	3	0	3	1
d__bacteria	p__proteobacteria	c__gammaproteobacteria	o__enterobacterales	f__vibrionaceae	g__salinivibrio	s__Salinivibrio kushneri	GCF_005280275.1	9	9	0	9	3
d__bacteria	p__spirochaetota	c__spirochaetia	o__dsm-27196	f__salinispiraceae	g__salinispira	s__Salinispira pacifica	GCF_000507245.1	2	2	0	2	1
d__bacteria	p__proteobacteria	c__gammaproteobacteria	o__nevskiales	f__salinisphaeraceae	g__salinisphaera	s__Salinisphaera sp003177035	GCF_003177035.1	2	2	0	2	2
d__bacteria	p__proteobacteria	c__gammaproteobacteria	o__enterobacterales	f__alteromonadaceae	g__saliniradius	s__Saliniradius amylolyticus	GCF_003143555.1	4	4	0	4	1
d__archaea	p__halobacteriota	c__halobacteria	o__halobacteriales	f__haloferacaceae	g__salinigranum	s__Salinigranum rubrum	GCF_002906575.1	2	2	0	2	1
d__bacteria	p__proteobacteria	c__gammaproteobacteria	o__pseudomonadales	f__halomonadaceae	g__salinicola	s__Salinicola tamaricis	GCF_003006155.1	5	5	0	5	1
d__bacteria	p__bacteroidota	c__rhodothermia	o__rhodothermales	f__salinibacteraceae	g__salinibacter	s__Salinibacter ruber	GCF_000013045.1	1	1	0	0	0
d__bacteria	p__firmicutes	c__bacilli	o__bacillales_d	f__alkalibacillaceae	g__salinibacillus	s__Salinibacillus sp010092505	GCF_010092505.1	9	9	0	9	4
d__archaea	p__halobacteriota	c__halobacteria	o__halobacteriales	f__salinarchaeaceae	g__salinarchaeum	s__Salinarchaeum sp000403645	GCF_000403645.1	1	1	0	1	1
d__bacteria	p__firmicutes	c__bacilli	o__bacillales_h	f__marinococcaceae	g__salicibibacter	s__Salicibibacter kimchii	GCF_003336365.1	6	6	0	6	2
d__bacteria	p__firmicutes	c__bacilli	o__bacillales_h	f__marinococcaceae	g__salicibibacter	s__Salicibibacter halophilus	GCF_006740705.1	6	6	0	6	2
d__bacteria	p__firmicutes	c__bacilli	o__bacillales_h	f__marinococcaceae	g__salicibibacter	s__Salicibibacter cibi	GCF_016495865.1	6	6	0	6	2
d__bacteria	p__firmicutes	c__bacilli	o__bacillales_h	f__marinococcaceae	g__salicibibacter	s__Salicibibacter cibarius	GCF_016495725.1	6	6	0	6	2
d__archaea	p__halobacteriota	c__halobacteria	o__halobacteriales	f__halobacteriaceae	g__salarchaeum	s__Salarchaeum sp007833275	GCF_007833275.1	1	1	0	1	1
d__bacteria	p__proteobacteria	c__alphaproteobacteria	o__rhizobiales	f__rhizobiaceae	g__salaquimonas	s__Salaquimonas pukyongi	GCF_001953055.1	1	1	0	1	1
d__bacteria	p__proteobacteria	c__alphaproteobacteria	o__rhodobacterales	f__rhodobacteraceae	g__sagittula	s__Sagittula sp002814095	GCF_002814095.1	2	2	0	2	2
d__bacteria	p__proteobacteria	c__gammaproteobacteria	o__pseudomonadales	f__natronospirillaceae	g__saccharospirillum	s__Saccharospirillum mangrovi	GCF_003367315.1	4	4	0	4	2
d__bacteria	p__actinobacteriota	c__actinomycetia	o__mycobacteriales	f__pseudonocardiaceae	g__saccharopolyspora_d	s__Saccharopolyspora_D erythraea_A	GCF_018141105.1	4	4	0	4	1
d__bacteria	p__actinobacteriota	c__actinomycetia	o__mycobacteriales	f__pseudonocardiaceae	g__saccharopolyspora_d	s__Saccharopolyspora_D erythraea	GCF_000062885.1	4	4	0	4	1
d__bacteria	p__actinobacteriota	c__actinomycetia	o__mycobacteriales	f__pseudonocardiaceae	g__saccharopolyspora	s__Saccharopolyspora pogona	GCF_014697215.1	5	5	0	5	1
d__bacteria	p__proteobacteria	c__gammaproteobacteria	o__pseudomonadales	f__cellvibrionaceae	g__saccharophagus	s__Saccharophagus degradans	GCF_000013665.1	2	2	0	2	2
d__bacteria	p__actinobacteriota	c__actinomycetia	o__mycobacteriales	f__pseudonocardiaceae	g__saccharomonospora	s__Saccharomonospora viridis	GCF_000023865.1	3	3	0	3	1
d__bacteria	p__actinobacteriota	c__actinomycetia	o__mycobacteriales	f__pseudonocardiaceae	g__saccharomonospora	s__Saccharomonospora marina_A	GCF_002240355.1	3	3	0	3	1
d__archaea	p__thermoproteota	c__thermoproteia	o__sulfolobales	f__sulfolobaceae	g__saccharolobus	s__Saccharolobus sp009601705	GCF_009601705.1	1	1	0	1	1
d__archaea	p__thermoproteota	c__thermoproteia	o__sulfolobales	f__sulfolobaceae	g__saccharolobus	s__Saccharolobus sp001719125	GCF_001719125.1	1	1	0	1	1
d__archaea	p__thermoproteota	c__thermoproteia	o__sulfolobales	f__sulfolobaceae	g__saccharolobus	s__Saccharolobus solfataricus	GCF_900079115.1	1	1	0	1	1
d__archaea	p__thermoproteota	c__thermoproteia	o__sulfolobales	f__sulfolobaceae	g__saccharolobus	s__Saccharolobus shibatae	GCF_019175345.1	1	1	0	1	1
d__archaea	p__thermoproteota	c__thermoproteia	o__sulfolobales	f__sulfolobaceae	g__saccharolobus	s__Saccharolobus islandicus	GCF_000022485.1	1	1	0	1	1
d__bacteria	p__patescibacteria	c__saccharimonadia	o__saccharimonadales	f__saccharimonadaceae	g__saccharimonas	s__Saccharimonas aalborgensis	GCF_000392435.1	1	1	0	0	0
d__bacteria	p__firmicutes	c__bacilli	o__paenibacillales	f__paenibacillaceae	g__saccharibacillus	s__Saccharibacillus brassicae	GCF_006542275.1	10	9	1	10	4
d__bacteria	p__proteobacteria	c__gammaproteobacteria	o__ps1	f__thioglobaceae	g__ruthia	s__Ruthia sp016592615	GCF_016592615.1	1	1	0	1	1
d__bacteria	p__proteobacteria	c__gammaproteobacteria	o__ps1	f__thioglobaceae	g__ruthia	s__Ruthia sp016592595	GCF_016592595.1	1	1	0	1	1
d__bacteria	p__proteobacteria	c__gammaproteobacteria	o__ps1	f__thioglobaceae	g__ruthia	s__Ruthia magnifica	GCF_000015105.1	1	1	0	1	1
d__bacteria	p__proteobacteria	c__gammaproteobacteria	o__ps1	f__thioglobaceae	g__ruthia	s__Ruthia endofausta	GCF_013342985.1	1	1	0	1	1
d__bacteria	p__bacteroidota	c__bacteroidia	o__cytophagales	f__spirosomaceae	g__runella	s__Runella sp003711225	GCF_003711225.1	3	3	0	3	2
d__bacteria	p__bacteroidota	c__bacteroidia	o__cytophagales	f__spirosomaceae	g__runella	s__Runella sp003325355	GCF_003325355.1	3	3	0	3	2
d__bacteria	p__bacteroidota	c__bacteroidia	o__cytophagales	f__spirosomaceae	g__runella	s__Runella slithyformis	GCF_000218895.1	2	2	0	2	1
d__bacteria	p__firmicutes_a	c__clostridia	o__oscillospirales	f__acutalibacteraceae	g__ruminococcus_e	s__Ruminococcus_E sp900314705	GCF_005601135.1	4	4	0	4	1
d__bacteria	p__firmicutes_a	c__clostridia	o__oscillospirales	f__ruminococcaceae	g__ruminococcus_d	s__Ruminococcus_D bicirculans	GCF_000723465.1	4	4	0	4	1
d__bacteria	p__firmicutes_a	c__clostridia	o__oscillospirales	f__ruminococcaceae	g__ruminococcus_d	s__Ruminococcus_D albus	GCF_000179635.2	4	4	0	4	1
d__bacteria	p__firmicutes_a	c__clostridia	o__lachnospirales	f__lachnospiraceae	g__ruminococcus_b	s__Ruminococcus_B gnavus	GCF_008121495.1	5	5	0	5	1
d__bacteria	p__firmicutes_a	c__clostridia	o__acetivibrionales	f__dsm-27016	g__ruminiclostridium	s__Ruminiclostridium sp000244875	GCF_000244875.1	8	8	0	8	1
d__bacteria	p__firmicutes_a	c__clostridia	o__acetivibrionales	f__dsm-27016	g__ruminiclostridium	s__Ruminiclostridium herbifermentans	GCF_005473905.2	5	5	0	5	1
d__bacteria	p__firmicutes_a	c__clostridia	o__acetivibrionales	f__dsm-27016	g__ruminiclostridium	s__Ruminiclostridium cellulolyticum	GCF_000022065.1	8	8	0	8	1
d__bacteria	p__proteobacteria	c__gammaproteobacteria	o__burkholderiales	f__rhodocyclaceae	g__rugosibacter	s__Rugosibacter aromaticivorans	GCF_000934545.1	2	2	0	2	1
d__bacteria	p__bacteroidota	c__bacteroidia	o__cytophagales	f__hymenobacteraceae	g__rufibacter	s__Rufibacter tibetensis	GCF_001310085.1	4	4	0	4	1
d__bacteria	p__bacteroidota	c__bacteroidia	o__cytophagales	f__hymenobacteraceae	g__rufibacter	s__Rufibacter radiotolerans	GCF_001078055.1	2	2	0	2	1
d__bacteria	p__proteobacteria	c__alphaproteobacteria	o__rhodobacterales	f__rhodobacteraceae	g__ruegeria_b	s__Ruegeria_B pomeroyi	GCF_000011965.2	3	3	0	3	1
d__bacteria	p__proteobacteria	c__alphaproteobacteria	o__rhodobacterales	f__rhodobacteraceae	g__ruegeria	s__Ruegeria sp009363615	GCF_009363615.1	3	3	0	3	1
d__bacteria	p__proteobacteria	c__alphaproteobacteria	o__rhodobacterales	f__rhodobacteraceae	g__ruegeria	s__Ruegeria sp003443535	GCF_003443535.1	3	1	2	3	3
d__bacteria	p__actinobacteriota	c__rubrobacteria	o__rubrobacterales	f__rubrobacteraceae	g__rubrobacter_b	s__Rubrobacter_B xylanophilus_A	GCF_007164525.1	1	1	0	1	1
d__bacteria	p__actinobacteriota	c__rubrobacteria	o__rubrobacterales	f__rubrobacteraceae	g__rubrobacter_b	s__Rubrobacter_B xylanophilus	GCF_000014185.1	1	1	0	1	1
d__bacteria	p__actinobacteriota	c__rubrobacteria	o__rubrobacterales	f__rubrobacteraceae	g__rubrobacter	s__Rubrobacter indicoceani	GCF_003568865.1	1	1	0	1	1
d__bacteria	p__proteobacteria	c__gammaproteobacteria	o__burkholderiales	f__burkholderiaceae	g__rubrivivax	s__Rubrivivax gelatinosus_A	GCF_000284255.1	3	3	0	3	1
d__bacteria	p__planctomycetota	c__planctomycetia	o__pirellulales	f__pirellulaceae	g__rubripirellula	s__Rubripirellula sp007741535	GCA_007741535.1	2	2	0	2	1
d__bacteria	p__planctomycetota	c__planctomycetia	o__planctomycetales	f__planctomycetaceae	g__rubinisphaera	s__Rubinisphaera brasiliensis	GCF_000165715.2	2	2	0	2	1
d__bacteria	p__actinobacteriota	c__actinomycetia	o__actinomycetales	f__beutenbergiaceae	g__ruania	s__Ruania sp008000995	GCF_008000995.1	2	2	0	2	1
d__bacteria	p__cyanobacteria	c__cyanobacteriia	o__pcc-6307	f__cyanobiaceae	g__rsccf101	s__RSCCF101 sp008807075	GCF_008807075.1	2	2	0	2	1
d__bacteria	p__actinobacteriota	c__actinomycetia	o__actinomycetales	f__micrococcaceae	g__rothia	s__Rothia sp016924835	GCF_016924835.1	4	4	0	4	1
d__bacteria	p__actinobacteriota	c__actinomycetia	o__actinomycetales	f__micrococcaceae	g__rothia	s__Rothia sp004136585	GCF_013394385.1	3	3	0	3	1
d__bacteria	p__actinobacteriota	c__actinomycetia	o__actinomycetales	f__micrococcaceae	g__rothia	s__Rothia nasimurium_C	GCF_014217215.1	3	3	0	3	1
d__bacteria	p__actinobacteriota	c__actinomycetia	o__actinomycetales	f__micrococcaceae	g__rothia	s__Rothia mucilaginosa_B	GCF_001548235.1	3	3	0	3	1
d__bacteria	p__actinobacteriota	c__actinomycetia	o__actinomycetales	f__micrococcaceae	g__rothia	s__Rothia dentocariosa	GCF_000164695.2	3	3	0	3	1
d__bacteria	p__actinobacteriota	c__actinomycetia	o__actinomycetales	f__micrococcaceae	g__rothia	s__Rothia amarae	GCF_014705945.2	3	3	0	3	1
d__bacteria	p__firmicutes	c__bacilli	o__bacillales_b	f__bacillaceae_b	g__rossellomorea	s__Rossellomorea sp011398925	GCF_011398925.1	9	9	0	9	3
d__bacteria	p__firmicutes	c__bacilli	o__bacillales_b	f__bacillaceae_b	g__rossellomorea	s__Rossellomorea marisflavi_A	GCF_009806575.1	10	10	0	10	2
d__bacteria	p__planctomycetota	c__planctomycetia	o__pirellulales	f__pirellulaceae	g__rosistilla	s__Rosistilla oblonga	GCF_007751715.1	1	0	1	1	1
d__bacteria	p__proteobacteria	c__alphaproteobacteria	o__rhodobacterales	f__rhodobacteraceae	g__roseovarius	s__Roseovarius sp009363715	GCF_009363715.1	1	1	0	1	1
d__bacteria	p__proteobacteria	c__alphaproteobacteria	o__rhodobacterales	f__rhodobacteraceae	g__roseovarius	s__Roseovarius sp009363655	GCF_009363655.1	1	1	0	1	1
d__bacteria	p__proteobacteria	c__alphaproteobacteria	o__rhodobacterales	f__rhodobacteraceae	g__roseovarius	s__Roseovarius mucosus_A	GCF_002080415.1	2	2	0	2	1
d__bacteria	p__proteobacteria	c__alphaproteobacteria	o__rhodobacterales	f__rhodobacteraceae	g__roseovarius	s__Roseovarius indicus	GCF_008728195.1	1	1	0	1	1
d__bacteria	p__proteobacteria	c__alphaproteobacteria	o__rhodobacterales	f__rhodobacteraceae	g__roseovarius	s__Roseovarius faecimaris	GCF_009762325.1	1	1	0	1	1
d__bacteria	p__proteobacteria	c__alphaproteobacteria	o__rhodobacterales	f__rhodobacteraceae	g__roseovarius	s__Roseovarius aestuariivivens_A	GCF_011040495.1	1	1	0	1	1
d__bacteria	p__proteobacteria	c__alphaproteobacteria	o__acetobacterales	f__acetobacteraceae	g__roseomonas	s__Roseomonas sp017654485	GCF_017654485.1	5	5	0	5	2
d__bacteria	p__proteobacteria	c__alphaproteobacteria	o__acetobacterales	f__acetobacteraceae	g__roseomonas	s__Roseomonas sp017355405	GCF_017355405.1	3	3	0	3	1
d__bacteria	p__proteobacteria	c__alphaproteobacteria	o__acetobacterales	f__acetobacteraceae	g__roseomonas	s__Roseomonas gilardii	GCF_001941945.1	5	5	0	5	1
d__bacteria	p__proteobacteria	c__alphaproteobacteria	o__acetobacterales	f__acetobacteraceae	g__roseococcus	s__Roseococcus sp014764365	GCF_014764365.1	2	2	0	2	1
d__bacteria	p__proteobacteria	c__alphaproteobacteria	o__rhodobacterales	f__rhodobacteraceae	g__roseobacter	s__Roseobacter ponti	GCF_012932215.1	1	1	0	1	1
d__bacteria	p__proteobacteria	c__alphaproteobacteria	o__rhodobacterales	f__rhodobacteraceae	g__roseobacter	s__Roseobacter litoralis	GCF_000154785.2	1	1	0	1	1
d__bacteria	p__proteobacteria	c__alphaproteobacteria	o__rhodobacterales	f__rhodobacteraceae	g__roseobacter	s__Roseobacter denitrificans	GCF_000014045.1	1	1	0	1	1
d__bacteria	p__proteobacteria	c__alphaproteobacteria	o__rhodobacterales	f__rhodobacteraceae	g__roseivivax	s__Roseivivax sp009363255	GCF_009363255.1	2	1	1	2	2
d__bacteria	p__proteobacteria	c__alphaproteobacteria	o__rhizobiales	f__rhizobiaceae	g__roseitalea	s__Roseitalea porphyridii	GCF_004331955.1	1	1	0	1	1
d__bacteria	p__verrucomicrobiota	c__verrucomicrobiae	o__verrucomicrobiales	f__verrucomicrobiaceae	g__roseimicrobium	s__Roseimicrobium sp011044495	GCF_011044495.1	2	2	0	2	1
d__bacteria	p__planctomycetota	c__planctomycetia	o__pirellulales	f__pirellulaceae	g__roseimaritima	s__Roseimaritima ulvae	GCF_008065135.1	1	0	1	1	1
d__bacteria	p__planctomycetota	c__planctomycetia	o__pirellulales	f__pirellulaceae	g__roseimaritima	s__Roseimaritima sp007741495	GCA_007741495.1	2	2	0	2	1
d__bacteria	p__chloroflexota	c__chloroflexia	o__chloroflexales	f__roseiflexaceae	g__roseiflexus	s__Roseiflexus sp000016665	GCF_000016665.1	2	2	0	2	1
d__bacteria	p__chloroflexota	c__chloroflexia	o__chloroflexales	f__roseiflexaceae	g__roseiflexus	s__Roseiflexus castenholzii	GCF_000017805.1	2	2	0	2	1
d__bacteria	p__proteobacteria	c__alphaproteobacteria	o__rhodobacterales	f__rhodobacteraceae	g__roseicyclus	s__Roseicyclus sp000013565	GCF_000013565.1	1	1	0	1	1
d__bacteria	p__proteobacteria	c__alphaproteobacteria	o__rhodobacterales	f__rhodobacteraceae	g__roseicyclus	s__Roseicyclus elongatus	GCF_000590925.1	2	0	2	2	2
d__bacteria	p__proteobacteria	c__alphaproteobacteria	o__rhodobacterales	f__rhodobacteraceae	g__roseicitreum	s__Roseicitreum antarcticum	GCF_014681765.1	2	2	0	2	1
d__bacteria	p__proteobacteria	c__alphaproteobacteria	o__rhizobiales	f__stappiaceae	g__roseibium	s__Roseibium sp009363435	GCF_009363435.1	3	3	0	3	1
d__bacteria	p__proteobacteria	c__alphaproteobacteria	o__rhizobiales	f__stappiaceae	g__roseibium	s__Roseibium sp006517275	GCF_006517275.1	3	3	0	3	1
d__bacteria	p__proteobacteria	c__alphaproteobacteria	o__rhizobiales	f__stappiaceae	g__roseibium	s__Roseibium sp002237595	GCF_002237595.1	3	3	0	3	1
d__bacteria	p__proteobacteria	c__alphaproteobacteria	o__rhizobiales	f__stappiaceae	g__roseibium	s__Roseibium aggregatum_A	GCF_001999245.1	3	3	0	3	1
d__bacteria	p__firmicutes_a	c__clostridia	o__lachnospirales	f__lachnospiraceae	g__roseburia	s__Roseburia intestinalis	GCF_900537995.1	6	6	0	6	2
d__bacteria	p__firmicutes_a	c__clostridia	o__lachnospirales	f__lachnospiraceae	g__roseburia	s__Roseburia hominis	GCF_000225345.1	4	4	0	4	1
d__bacteria	p__proteobacteria	c__gammaproteobacteria	o__enterobacterales	f__pasteurellaceae	g__rodentibacter	s__Rodentibacter sp015356115	GCF_015356115.1	6	6	0	6	4
d__bacteria	p__bacteroidota	c__bacteroidia	o__flavobacteriales	f__flavobacteriaceae	g__robiginitalea	s__Robiginitalea biformata	GCF_000024125.1	2	2	0	2	1
d__bacteria	p__firmicutes	c__bacilli	o__bacillales_b	f__dsm-18226	g__robertmurraya	s__Robertmurraya sp003586445	GCF_003586445.1	14	14	0	14	3
d__bacteria	p__cyanobacteria	c__cyanobacteriia	o__cyanobacteriales	f__nostocaceae	g__rivularia	s__Rivularia sp000316665	GCF_000316665.1	3	3	0	3	1
d__bacteria	p__proteobacteria	c__gammaproteobacteria	o__burkholderiales	f__aquaspirillaceae	g__rivicola	s__Rivicola sp002002905	GCF_002002905.1	5	5	0	5	1
d__bacteria	p__cyanobacteria	c__cyanobacteriia	o__cyanobacteriales	f__microcystaceae_a	g__rippkaea	s__Rippkaea sp003574135	GCF_003574135.1	2	2	0	1	1
d__bacteria	p__cyanobacteria	c__cyanobacteriia	o__cyanobacteriales	f__microcystaceae_a	g__rippkaea	s__Rippkaea sp000829235	GCF_000829235.1	2	2	0	2	1
d__bacteria	p__cyanobacteria	c__cyanobacteriia	o__cyanobacteriales	f__microcystaceae_a	g__rippkaea	s__Rippkaea orientalis	GCF_000021805.1	2	2	0	2	1
d__bacteria	p__bacteroidota	c__bacteroidia	o__flavobacteriales	f__weeksellaceae	g__riemerella	s__Riemerella anatipestifer	GCF_000252855.1	3	3	0	3	1
d__bacteria	p__proteobacteria	c__gammaproteobacteria	o__diplorickettsiales	f__diplorickettsiaceae	g__rickettsiella_b	s__Rickettsiella_B viridis	GCF_003966755.1	2	2	0	2	1
d__bacteria	p__proteobacteria	c__alphaproteobacteria	o__rickettsiales	f__rickettsiaceae	g__rickettsia	s__Rickettsia typhi	GCF_000008045.1	1	1	0	1	1
d__bacteria	p__proteobacteria	c__alphaproteobacteria	o__rickettsiales	f__rickettsiaceae	g__rickettsia	s__Rickettsia tillamookensis	GCF_016743795.1	1	1	0	1	1
d__bacteria	p__proteobacteria	c__alphaproteobacteria	o__rickettsiales	f__rickettsiaceae	g__rickettsia	s__Rickettsia sp002285905	GCF_002285905.1	1	1	0	1	1
d__bacteria	p__proteobacteria	c__alphaproteobacteria	o__rickettsiales	f__rickettsiaceae	g__rickettsia	s__Rickettsia rickettsii	GCF_001951015.1	1	1	0	1	1
d__bacteria	p__proteobacteria	c__alphaproteobacteria	o__rickettsiales	f__rickettsiaceae	g__rickettsia	s__Rickettsia rhipicephali	GCF_000284075.1	1	1	0	1	1
d__bacteria	p__proteobacteria	c__alphaproteobacteria	o__rickettsiales	f__rickettsiaceae	g__rickettsia	s__Rickettsia prowazekii	GCF_000367405.1	1	1	0	1	1
d__bacteria	p__proteobacteria	c__alphaproteobacteria	o__rickettsiales	f__rickettsiaceae	g__rickettsia	s__Rickettsia canadensis	GCF_000014345.1	1	1	0	1	1
d__bacteria	p__proteobacteria	c__alphaproteobacteria	o__rickettsiales	f__rickettsiaceae	g__rickettsia	s__Rickettsia bellii	GCF_000012385.1	1	1	0	1	1
d__bacteria	p__proteobacteria	c__alphaproteobacteria	o__rickettsiales	f__rickettsiaceae	g__rickettsia	s__Rickettsia akari	GCF_000018205.1	1	1	0	1	1
d__bacteria	p__proteobacteria	c__alphaproteobacteria	o__rickettsiales	f__33-17	g__rick01	s__RICK01 sp003932735	GCF_003932735.1	1	1	0	1	1
d__bacteria	p__proteobacteria	c__alphaproteobacteria	o__rhodobacterales	f__rhodobacteraceae	g__rhodovulum	s__Rhodovulum sulfidophilum	GCF_001633165.1	3	3	0	3	1
d__bacteria	p__proteobacteria	c__alphaproteobacteria	o__rhodobacterales	f__rhodobacteraceae	g__rhodovulum	s__Rhodovulum sp002079305	GCF_002079305.1	3	3	0	3	1
d__bacteria	p__proteobacteria	c__alphaproteobacteria	o__rhodobacterales	f__rhodobacteraceae	g__rhodovulum	s__Rhodovulum sp002073975	GCF_002073975.1	3	3	0	3	1
d__bacteria	p__bacteroidota	c__rhodothermia	o__rhodothermales	f__rhodothermaceae	g__rhodothermus	s__Rhodothermus marinus	GCF_000024845.1	1	1	0	0	0
d__bacteria	p__proteobacteria	c__alphaproteobacteria	o__rhodospirillales	f__rhodospirillaceae	g__rhodospirillum	s__Rhodospirillum rubrum	GCF_000013085.1	4	4	0	4	1
d__bacteria	p__proteobacteria	c__alphaproteobacteria	o__rhizobiales	f__xanthobacteraceae	g__rhodopseudomonas	s__Rhodopseudomonas palustris_J	GCF_000013365.1	1	1	0	1	1
d__bacteria	p__proteobacteria	c__alphaproteobacteria	o__rhizobiales	f__xanthobacteraceae	g__rhodopseudomonas	s__Rhodopseudomonas palustris_H	GCF_003031265.1	2	2	0	2	1
d__bacteria	p__proteobacteria	c__alphaproteobacteria	o__rhizobiales	f__xanthobacteraceae	g__rhodopseudomonas	s__Rhodopseudomonas palustris_F	GCF_013415845.1	2	2	0	2	1
d__bacteria	p__planctomycetota	c__planctomycetia	o__pirellulales	f__pirellulaceae	g__rhodopirellula	s__Rhodopirellula baltica	GCF_000196115.1	1	1	0	1	1
d__bacteria	p__proteobacteria	c__alphaproteobacteria	o__rhodobacterales	f__rhodobacteraceae	g__rhodophyticola	s__Rhodophyticola sp004751985	GCF_004751985.1	1	1	0	1	1
d__bacteria	p__proteobacteria	c__alphaproteobacteria	o__rhizobiales	f__rhodomicrobiaceae	g__rhodomicrobium	s__Rhodomicrobium vannielii	GCF_000166055.1	2	2	0	2	2
d__bacteria	p__actinobacteriota	c__actinomycetia	o__actinomycetales	f__microbacteriaceae	g__rhodoluna	s__Rhodoluna planktonica	GCF_001854225.1	1	1	0	1	1
d__bacteria	p__actinobacteriota	c__actinomycetia	o__actinomycetales	f__microbacteriaceae	g__rhodoluna	s__Rhodoluna limnophila	GCF_005845365.1	1	1	0	1	1
d__bacteria	p__actinobacteriota	c__actinomycetia	o__actinomycetales	f__microbacteriaceae	g__rhodoluna	s__Rhodoluna lacicola	GCF_000699505.1	1	1	0	1	1
d__bacteria	p__actinobacteriota	c__actinomycetia	o__actinomycetales	f__microbacteriaceae	g__rhodoglobus	s__Rhodoglobus sp004118935	GCF_004118935.1	2	2	0	2	1
d__bacteria	p__proteobacteria	c__gammaproteobacteria	o__burkholderiales	f__burkholderiaceae	g__rhodoferax_b	s__Rhodoferax_B koreense	GCF_001955695.1	3	3	0	3	1
d__bacteria	p__proteobacteria	c__gammaproteobacteria	o__burkholderiales	f__burkholderiaceae	g__rhodoferax_a	s__Rhodoferax_A sediminis	GCF_006970865.1	1	1	0	1	1
d__bacteria	p__proteobacteria	c__gammaproteobacteria	o__burkholderiales	f__burkholderiaceae	g__rhodoferax	s__Rhodoferax sp017948265	GCF_017948265.1	6	6	0	6	1
d__bacteria	p__proteobacteria	c__gammaproteobacteria	o__burkholderiales	f__burkholderiaceae	g__rhodoferax	s__Rhodoferax sp017798165	GCF_017798165.1	2	2	0	2	1
d__bacteria	p__proteobacteria	c__gammaproteobacteria	o__burkholderiales	f__burkholderiaceae	g__rhodoferax	s__Rhodoferax sp006974105	GCF_006974105.1	5	5	0	5	1
d__bacteria	p__proteobacteria	c__gammaproteobacteria	o__burkholderiales	f__burkholderiaceae	g__rhodoferax	s__Rhodoferax saidenbachensis	GCF_001955715.1	2	2	0	2	1
d__bacteria	p__proteobacteria	c__gammaproteobacteria	o__burkholderiales	f__burkholderiaceae	g__rhodoferax	s__Rhodoferax ferrireducens	GCF_000013605.1	2	2	0	2	1
d__bacteria	p__bacteroidota	c__bacteroidia	o__cytophagales	f__172606-1	g__rhodocytophaga	s__Rhodocytophaga rosea	GCF_010119975.1	3	3	0	3	1
d__bacteria	p__actinobacteriota	c__actinomycetia	o__mycobacteriales	f__mycobacteriaceae	g__rhodococcus_b	s__Rhodococcus_B sp004795915	GCF_004795915.1	4	4	0	4	1
d__bacteria	p__actinobacteriota	c__actinomycetia	o__mycobacteriales	f__mycobacteriaceae	g__rhodococcus_b	s__Rhodococcus_B sp003641205	GCF_003641205.1	4	4	0	4	1
d__bacteria	p__actinobacteriota	c__actinomycetia	o__mycobacteriales	f__mycobacteriaceae	g__rhodococcus_b	s__Rhodococcus_B sp000954115	GCF_000954115.1	4	4	0	4	3
d__bacteria	p__actinobacteriota	c__actinomycetia	o__mycobacteriales	f__mycobacteriaceae	g__rhodococcus	s__Rhodococcus triatomae	GCF_014217785.1	3	2	1	2	1
d__bacteria	p__actinobacteriota	c__actinomycetia	o__mycobacteriales	f__mycobacteriaceae	g__rhodococcus	s__Rhodococcus sp005484805	GCF_005484805.1	4	4	0	4	1
d__bacteria	p__actinobacteriota	c__actinomycetia	o__mycobacteriales	f__mycobacteriaceae	g__rhodococcus	s__Rhodococcus sp004328705	GCF_004328705.1	4	4	0	4	2
d__bacteria	p__actinobacteriota	c__actinomycetia	o__mycobacteriales	f__mycobacteriaceae	g__rhodococcus	s__Rhodococcus sp003350365	GCF_013348805.1	5	5	0	5	1
d__bacteria	p__actinobacteriota	c__actinomycetia	o__mycobacteriales	f__mycobacteriaceae	g__rhodococcus	s__Rhodococcus sp003130705	GCF_003130705.1	4	4	0	4	1
d__bacteria	p__actinobacteriota	c__actinomycetia	o__mycobacteriales	f__mycobacteriaceae	g__rhodococcus	s__Rhodococcus sp002165735	GCF_017068395.1	4	4	0	4	2
d__bacteria	p__actinobacteriota	c__actinomycetia	o__mycobacteriales	f__mycobacteriaceae	g__rhodococcus	s__Rhodococcus sp001767395	GCF_001767395.1	4	4	0	4	1
d__bacteria	p__actinobacteriota	c__actinomycetia	o__mycobacteriales	f__mycobacteriaceae	g__rhodococcus	s__Rhodococcus rhodochrous	GCF_900187265.1	4	4	0	4	2
d__bacteria	p__actinobacteriota	c__actinomycetia	o__mycobacteriales	f__mycobacteriaceae	g__rhodococcus	s__Rhodococcus opacus_C	GCF_000010805.1	4	4	0	4	2
d__bacteria	p__actinobacteriota	c__actinomycetia	o__mycobacteriales	f__mycobacteriaceae	g__rhodococcus	s__Rhodococcus jostii_A	GCF_000014565.1	4	4	0	4	2
d__bacteria	p__proteobacteria	c__alphaproteobacteria	o__rhodobacterales	f__rhodobacteraceae	g__rhodobacter	s__Rhodobacter capsulatus_B	GCF_000021865.1	4	4	0	4	1
d__bacteria	p__proteobacteria	c__gammaproteobacteria	o__xanthomonadales	f__rhodanobacteraceae	g__rhodanobacter	s__Rhodanobacter sp001427365	GCF_016889805.1	2	2	0	2	1
d__bacteria	p__proteobacteria	c__gammaproteobacteria	o__xanthomonadales	f__rhodanobacteraceae	g__rhodanobacter	s__Rhodanobacter denitrificans	GCF_000230695.2	2	2	0	2	1
d__bacteria	p__proteobacteria	c__alphaproteobacteria	o__sphingomonadales	f__sphingomonadaceae	g__rhizorhabdus	s__Rhizorhabdus sp011044255	GCF_011044255.1	2	2	0	2	1
d__bacteria	p__proteobacteria	c__alphaproteobacteria	o__sphingomonadales	f__sphingomonadaceae	g__rhizorhabdus	s__Rhizorhabdus dicambivorans	GCF_002355275.1	2	2	0	2	1
d__bacteria	p__proteobacteria	c__alphaproteobacteria	o__rhizobiales	f__rhizobiaceae	g__rhizobium_a	s__Rhizobium_A rhizoryzae	GCF_011046895.1	5	5	0	5	1
d__bacteria	p__proteobacteria	c__alphaproteobacteria	o__rhizobiales	f__rhizobiaceae	g__rhizobium_a	s__Rhizobium_A pseudoryzae	GCF_011046245.1	4	4	0	4	1
d__bacteria	p__proteobacteria	c__alphaproteobacteria	o__rhizobiales	f__rhizobiaceae	g__rhizobium	s__Rhizobium yanglingense	GCF_015353075.1	3	3	0	3	1
d__bacteria	p__proteobacteria	c__alphaproteobacteria	o__rhizobiales	f__rhizobiaceae	g__rhizobium	s__Rhizobium tropici	GCF_000330885.1	3	3	0	3	1
d__bacteria	p__proteobacteria	c__alphaproteobacteria	o__rhizobiales	f__rhizobiaceae	g__rhizobium	s__Rhizobium sp900468685	GCF_016864575.1	4	4	0	4	1
d__bacteria	p__proteobacteria	c__alphaproteobacteria	o__rhizobiales	f__rhizobiaceae	g__rhizobium	s__Rhizobium sp018987265	GCF_018987265.1	3	3	0	3	1
d__bacteria	p__proteobacteria	c__alphaproteobacteria	o__rhizobiales	f__rhizobiaceae	g__rhizobium	s__Rhizobium sp017948245	GCF_017948245.1	1	1	0	1	1
d__bacteria	p__proteobacteria	c__alphaproteobacteria	o__rhizobiales	f__rhizobiaceae	g__rhizobium	s__Rhizobium sp017357385	GCF_017357385.1	3	3	0	3	1
d__bacteria	p__proteobacteria	c__alphaproteobacteria	o__rhizobiales	f__rhizobiaceae	g__rhizobium	s__Rhizobium sp003627795	GCF_003627795.1	3	3	0	3	1
d__bacteria	p__proteobacteria	c__alphaproteobacteria	o__rhizobiales	f__rhizobiaceae	g__rhizobium	s__Rhizobium sp002944315	GCF_002944315.1	3	3	0	3	1
d__bacteria	p__proteobacteria	c__alphaproteobacteria	o__rhizobiales	f__rhizobiaceae	g__rhizobium	s__Rhizobium sp002277895	GCF_002277895.1	3	3	0	3	2
d__bacteria	p__proteobacteria	c__alphaproteobacteria	o__rhizobiales	f__rhizobiaceae	g__rhizobium	s__Rhizobium sp002117485	GCF_002117485.1	3	3	0	3	1
d__bacteria	p__proteobacteria	c__alphaproteobacteria	o__rhizobiales	f__rhizobiaceae	g__rhizobium	s__Rhizobium sp001664485	GCF_001664485.1	3	3	0	3	2
d__bacteria	p__proteobacteria	c__alphaproteobacteria	o__rhizobiales	f__rhizobiaceae	g__rhizobium	s__Rhizobium sp000172795	GCF_000172795.2	3	3	0	3	1
d__bacteria	p__proteobacteria	c__alphaproteobacteria	o__rhizobiales	f__rhizobiaceae	g__rhizobium	s__Rhizobium lentis	GCF_017352135.1	3	3	0	3	1
d__bacteria	p__proteobacteria	c__alphaproteobacteria	o__rhizobiales	f__rhizobiaceae	g__rhizobium	s__Rhizobium leguminosarum_L	GCF_000009265.1	3	3	0	3	1
d__bacteria	p__proteobacteria	c__alphaproteobacteria	o__rhizobiales	f__rhizobiaceae	g__rhizobium	s__Rhizobium leguminosarum_K	GCF_002953715.1	3	3	0	3	2
d__bacteria	p__proteobacteria	c__alphaproteobacteria	o__rhizobiales	f__rhizobiaceae	g__rhizobium	s__Rhizobium leguminosarum_J	GCF_000023185.1	3	3	0	3	1
d__bacteria	p__proteobacteria	c__alphaproteobacteria	o__rhizobiales	f__rhizobiaceae	g__rhizobium	s__Rhizobium leguminosarum_E	GCF_000769405.2	3	3	0	3	2
d__bacteria	p__proteobacteria	c__alphaproteobacteria	o__rhizobiales	f__rhizobiaceae	g__rhizobium	s__Rhizobium jaguaris	GCF_003627755.1	3	3	0	3	1
d__bacteria	p__proteobacteria	c__alphaproteobacteria	o__rhizobiales	f__rhizobiaceae	g__rhizobium	s__Rhizobium indicum	GCF_005862305.2	3	3	0	3	1
d__bacteria	p__proteobacteria	c__alphaproteobacteria	o__rhizobiales	f__rhizobiaceae	g__rhizobium	s__Rhizobium grahamii_A	GCF_009498215.1	4	4	0	4	1
d__bacteria	p__proteobacteria	c__alphaproteobacteria	o__rhizobiales	f__rhizobiaceae	g__rhizobium	s__Rhizobium gallicum	GCF_000816845.1	3	3	0	3	1
d__bacteria	p__proteobacteria	c__alphaproteobacteria	o__rhizobiales	f__rhizobiaceae	g__rhizobium	s__Rhizobium etli_B	GCF_001908375.1	3	3	0	3	1
d__bacteria	p__proteobacteria	c__alphaproteobacteria	o__rhizobiales	f__rhizobiaceae	g__rhizobium	s__Rhizobium etli	GCF_000092045.1	3	3	0	3	1
d__bacteria	p__proteobacteria	c__alphaproteobacteria	o__rhizobiales	f__rhizobiaceae	g__rhizobium	s__Rhizobium binae	GCF_017357225.1	3	3	0	3	1
d__bacteria	p__proteobacteria	c__alphaproteobacteria	o__rhizobiales	f__rhizobiaceae	g__rhizobium	s__Rhizobium bangladeshense	GCF_017357245.1	3	3	0	3	1
d__bacteria	p__proteobacteria	c__alphaproteobacteria	o__rhizobiales	f__rhizobiaceae	g__rhizobium	s__Rhizobium acidisoli	GCF_002531755.2	3	3	0	3	1
d__bacteria	p__proteobacteria	c__gammaproteobacteria	o__burkholderiales	f__burkholderiaceae	g__rhizobacter	s__Rhizobacter gummiphilus	GCF_002116905.1	3	3	0	3	1
d__bacteria	p__proteobacteria	c__gammaproteobacteria	o__enterobacterales	f__alteromonadaceae	g__rheinheimera	s__Rheinheimera sp004345025	GCF_004345025.1	5	5	0	5	1
d__bacteria	p__proteobacteria	c__gammaproteobacteria	o__enterobacterales	f__enterobacteriaceae	g__rhbstw-00994	s__RHBSTW-00994 sp013782625	GCF_013782625.1	8	8	0	8	4
d__bacteria	p__actinobacteriota	c__actinomycetia	o__actinomycetales	f__micrococcaceae	g__renibacterium	s__Renibacterium salmoninarum	GCF_000018885.1	2	2	0	2	1
d__bacteria	p__proteobacteria	c__gammaproteobacteria	o__pseudomonadales	f__natronospirillaceae	g__reinekea	s__Reinekea forsetii	GCF_002795845.1	5	5	0	5	2
d__bacteria	p__proteobacteria	c__gammaproteobacteria	o__gcf-013343005		g__reidiella	s__Reidiella endopervernicosa	GCF_013343005.1	1	1	0	1	1
d__bacteria	p__actinobacteriota	c__actinomycetia	o__actinomycetales	f__microbacteriaceae	g__rathayibacter	s__Rathayibacter sp009834225	GCF_009834225.1	2	2	0	2	1
d__bacteria	p__actinobacteriota	c__actinomycetia	o__actinomycetales	f__microbacteriaceae	g__rathayibacter	s__Rathayibacter sp009834185	GCF_009834185.1	2	2	0	2	1
d__bacteria	p__actinobacteriota	c__actinomycetia	o__actinomycetales	f__microbacteriaceae	g__rathayibacter	s__Rathayibacter rathayi	GCF_004011095.1	2	2	0	2	1
d__bacteria	p__actinobacteriota	c__actinomycetia	o__actinomycetales	f__microbacteriaceae	g__rathayibacter	s__Rathayibacter festucae	GCF_004011135.1	2	2	0	2	1
d__bacteria	p__cyanobacteria	c__cyanobacteriia	o__cyanobacteriales	f__nostocaceae	g__raphidiopsis	s__Raphidiopsis curvispora_A	GCF_014489415.1	3	3	0	3	2
d__bacteria	p__proteobacteria	c__gammaproteobacteria	o__burkholderiales	f__burkholderiaceae	g__ramlibacter	s__Ramlibacter tataouinensis_B	GCF_001580455.1	2	2	0	2	1
d__bacteria	p__proteobacteria	c__gammaproteobacteria	o__burkholderiales	f__burkholderiaceae	g__ramlibacter	s__Ramlibacter tataouinensis	GCF_000215705.1	1	1	0	1	1
d__bacteria	p__proteobacteria	c__gammaproteobacteria	o__burkholderiales	f__burkholderiaceae	g__ralstonia	s__Ralstonia syzygii	GCF_016743075.1	3	3	0	3	3
d__bacteria	p__proteobacteria	c__gammaproteobacteria	o__burkholderiales	f__burkholderiaceae	g__ralstonia	s__Ralstonia pseudosolanacearum	GCF_003999715.1	3	3	0	3	3
d__bacteria	p__actinobacteriota	c__actinomycetia	o__propionibacteriales	f__propionibacteriaceae	g__raineyella	s__Raineyella sp009646095	GCF_009646095.1	3	3	0	3	1
d__bacteria	p__proteobacteria	c__gammaproteobacteria	o__enterobacterales	f__enterobacteriaceae	g__rahnella	s__Rahnella sp002951615	GCF_002951615.1	8	8	0	8	1
d__bacteria	p__firmicutes	c__bacilli	o__bacillales_d	f__amphibacillaceae	g__radiobacillus	s__Radiobacillus deserti	GCF_007301515.1	8	8	0	8	5
d__bacteria	p__firmicutes	c__bacilli	o__bacillales_b	f__r1dc41		s__R1DC41 sp015482585	GCA_015482585.1	12	12	0	12	2
d__bacteria	p__proteobacteria	c__alphaproteobacteria	o__sphingomonadales	f__sphingomonadaceae	g__qipengyuania	s__Qipengyuania sp002895025	GCF_015767595.1	2	2	0	2	2
d__bacteria	p__proteobacteria	c__alphaproteobacteria	o__sphingomonadales	f__sphingomonadaceae	g__qipengyuania	s__Qipengyuania seohaensis	GCF_002795865.1	1	1	0	1	1
d__bacteria	p__proteobacteria	c__alphaproteobacteria	o__sphingomonadales	f__sphingomonadaceae	g__qipengyuania	s__Qipengyuania sediminis	GCF_004358425.1	1	1	0	1	1
d__bacteria	p__proteobacteria	c__alphaproteobacteria	o__sphingomonadales	f__sphingomonadaceae	g__qipengyuania	s__Qipengyuania mangrovi	GCF_013260645.1	1	0	1	1	1
d__bacteria	p__proteobacteria	c__alphaproteobacteria	o__sphingomonadales	f__sphingomonadaceae	g__qipengyuania	s__Qipengyuania aurea	GCF_003355455.1	2	0	2	2	2
d__bacteria	p__proteobacteria	c__alphaproteobacteria	o__rhodobacterales	f__rhodobacteraceae	g__qingshengfaniella	s__Qingshengfaniella alkalisoli	GCF_007855645.1	3	3	0	3	1
d__bacteria	p__bacteroidota	c__bacteroidia	o__chitinophagales	f__chitinophagaceae	g__qfoi01	s__QFOI01 sp004337365	GCF_004337365.2	4	4	0	4	1
d__bacteria	p__cyanobacteria	c__cyanobacteriia	o__pcc-6307	f__cyanobiaceae	g__qbmd01	s__QBMD01 sp001885215	GCF_001885215.1	2	0	2	2	1
d__bacteria	p__proteobacteria	c__alphaproteobacteria	o__parvibaculales	f__cgmcc-115125	g__pyruvatibacter	s__Pyruvatibacter mobilis	GCF_012848855.1	1	1	0	1	1
d__archaea	p__thermoproteota	c__thermoproteia	o__sulfolobales	f__pyrodictiaceae	g__pyrolobus	s__Pyrolobus fumarii	GCF_000223395.1	1	1	0	1	1
d__archaea	p__thermoproteota	c__thermoproteia	o__sulfolobales	f__pyrodictiaceae	g__pyrodictium	s__Pyrodictium delaneyi	GCF_001412615.1	1	1	0	1	1
d__archaea	p__methanobacteriota_b	c__thermococci	o__thermococcales	f__thermococcaceae	g__pyrococcus	s__Pyrococcus yayanosii	GCF_000215995.1	1	1	0	1	1
d__archaea	p__methanobacteriota_b	c__thermococci	o__thermococcales	f__thermococcaceae	g__pyrococcus	s__Pyrococcus sp000263735	GCF_000263735.1	1	1	0	1	1
d__archaea	p__methanobacteriota_b	c__thermococci	o__thermococcales	f__thermococcaceae	g__pyrococcus	s__Pyrococcus sp000211475	GCF_000211475.1	1	1	0	1	1
d__archaea	p__methanobacteriota_b	c__thermococci	o__thermococcales	f__thermococcaceae	g__pyrococcus	s__Pyrococcus kukulkanii	GCF_001577775.1	1	1	0	1	1
d__archaea	p__methanobacteriota_b	c__thermococci	o__thermococcales	f__thermococcaceae	g__pyrococcus	s__Pyrococcus horikoshii	GCF_000011105.1	1	1	0	1	1
d__archaea	p__methanobacteriota_b	c__thermococci	o__thermococcales	f__thermococcaceae	g__pyrococcus	s__Pyrococcus furiosus	GCF_000007305.1	1	1	0	1	1
d__archaea	p__methanobacteriota_b	c__thermococci	o__thermococcales	f__thermococcaceae	g__pyrococcus	s__Pyrococcus chitonophagus	GCF_002214605.1	1	1	0	1	1
d__archaea	p__methanobacteriota_b	c__thermococci	o__thermococcales	f__thermococcaceae	g__pyrococcus	s__Pyrococcus abyssi	GCF_000195935.2	1	1	0	1	1
d__archaea	p__thermoproteota	c__thermoproteia	o__thermoproteales	f__thermoproteaceae	g__pyrobaculum	s__Pyrobaculum islandicum	GCF_000015205.1	1	1	0	1	1
d__archaea	p__thermoproteota	c__thermoproteia	o__thermoproteales	f__thermoproteaceae	g__pyrobaculum	s__Pyrobaculum calidifontis	GCF_000015805.1	1	1	0	1	1
d__bacteria	p__proteobacteria	c__gammaproteobacteria	o__burkholderiales	f__burkholderiaceae	g__pusillimonas_d	s__Pusillimonas_D thiosulfatoxidans	GCF_004022565.1	2	2	0	2	1
d__bacteria	p__proteobacteria	c__gammaproteobacteria	o__burkholderiales	f__burkholderiaceae	g__pusillimonas_c	s__Pusillimonas_C sp000209655	GCF_000209655.1	2	2	0	2	1
d__bacteria	p__proteobacteria	c__gammaproteobacteria	o__burkholderiales	f__burkholderiaceae	g__pusillimonas_a	s__Pusillimonas_A sp011388195	GCF_011388195.1	3	3	0	3	1
d__bacteria	p__proteobacteria	c__gammaproteobacteria	o__enterobacterales_a	f__enterobacteriaceae_a	g__purcelliella	s__Purcelliella pentastirinorum	GCF_003391335.1	1	1	0	1	1
d__bacteria	p__proteobacteria	c__alphaproteobacteria	o__puniceispirillales	f__puniceispirillaceae	g__puniceispirillum	s__Puniceispirillum marinum	GCF_000024465.1	1	1	0	1	1
d__bacteria	p__proteobacteria	c__gammaproteobacteria	o__burkholderiales	f__burkholderiaceae	g__pulveribacter	s__Pulveribacter suum	GCF_003013695.1	3	3	0	3	1
d__bacteria	p__proteobacteria	c__alphaproteobacteria	o__rhodobacterales	f__rhodobacteraceae	g__pukyongiella	s__Pukyongiella litopenaei	GCF_003008555.2	1	1	0	1	1
d__bacteria	p__bacteroidota	c__bacteroidia	o__flavobacteriales	f__flavobacteriaceae	g__pukyongia	s__Pukyongia salina	GCF_002966125.1	2	2	0	2	1
d__bacteria	p__proteobacteria	c__gammaproteobacteria	o__enterobacterales	f__alteromonadaceae	g__psychrosphaera	s__Psychrosphaera sp017638545	GCF_017638545.1	6	6	0	6	2
d__bacteria	p__proteobacteria	c__gammaproteobacteria	o__enterobacterales	f__alteromonadaceae	g__psychrosphaera	s__Psychrosphaera aestuarii	GCF_017948405.1	5	5	0	5	1
d__bacteria	p__proteobacteria	c__gammaproteobacteria	o__enterobacterales	f__psychromonadaceae	g__psychromonas	s__Psychromonas sp000153405	GCF_000153405.2	10	10	0	10	1
d__bacteria	p__proteobacteria	c__gammaproteobacteria	o__enterobacterales	f__psychromonadaceae	g__psychromonas	s__Psychromonas ingrahamii	GCF_000015285.1	9	9	0	9	1
d__bacteria	p__actinobacteriota	c__actinomycetia	o__actinomycetales	f__micrococcaceae	g__psychromicrobium	s__Psychromicrobium lacuslunae	GCF_000950575.1	2	2	0	2	1
d__bacteria	p__bacteroidota	c__bacteroidia	o__flavobacteriales	f__flavobacteriaceae	g__psychroflexus	s__Psychroflexus torquis	GCF_000153485.2	3	3	0	3	1
d__bacteria	p__bacteroidota	c__bacteroidia	o__flavobacteriales	f__flavobacteriaceae	g__psychroflexus	s__Psychroflexus sp018080005	GCF_018080005.1	2	2	0	2	1
d__bacteria	p__bacteroidota	c__bacteroidia	o__flavobacteriales	f__flavobacteriaceae	g__psychroflexus	s__Psychroflexus sp017311165	GCF_017311165.1	3	3	0	3	1
d__bacteria	p__proteobacteria	c__gammaproteobacteria	o__pseudomonadales	f__moraxellaceae	g__psychrobacter	s__Psychrobacter urativorans_A	GCF_001298525.1	6	6	0	6	1
d__bacteria	p__proteobacteria	c__gammaproteobacteria	o__pseudomonadales	f__moraxellaceae	g__psychrobacter	s__Psychrobacter sp900168255	GCF_900168255.1	4	4	0	4	1
d__bacteria	p__proteobacteria	c__gammaproteobacteria	o__pseudomonadales	f__moraxellaceae	g__psychrobacter	s__Psychrobacter sp018448495	GCA_018448495.1	6	6	0	6	1
d__bacteria	p__proteobacteria	c__gammaproteobacteria	o__pseudomonadales	f__moraxellaceae	g__psychrobacter	s__Psychrobacter sp014770435	GCF_014770435.1	5	5	0	5	1
d__bacteria	p__proteobacteria	c__gammaproteobacteria	o__pseudomonadales	f__moraxellaceae	g__psychrobacter	s__Psychrobacter sp001593285	GCF_001593285.1	4	4	0	4	1
d__bacteria	p__proteobacteria	c__gammaproteobacteria	o__pseudomonadales	f__moraxellaceae	g__psychrobacter	s__Psychrobacter cryohalolentis	GCF_000013905.1	4	4	0	4	1
d__bacteria	p__proteobacteria	c__gammaproteobacteria	o__pseudomonadales	f__moraxellaceae	g__psychrobacter	s__Psychrobacter arenosus	GCF_904848165.1	4	4	0	4	1
d__bacteria	p__proteobacteria	c__gammaproteobacteria	o__pseudomonadales	f__moraxellaceae	g__psychrobacter	s__Psychrobacter arcticus	GCF_000012305.1	4	4	0	4	1
d__bacteria	p__proteobacteria	c__gammaproteobacteria	o__pseudomonadales	f__moraxellaceae	g__psychrobacter	s__Psychrobacter alimentarius_A	GCF_001606025.1	5	5	0	5	1
d__bacteria	p__firmicutes	c__bacilli	o__bacillales_a	f__planococcaceae	g__psychrobacillus	s__Psychrobacillus sp018140925	GCF_018140925.1	10	10	0	10	2
d__bacteria	p__firmicutes	c__bacilli	o__bacillales_a	f__planococcaceae	g__psychrobacillus	s__Psychrobacillus sp008807035	GCF_008807035.1	10	10	0	10	4
d__bacteria	p__firmicutes	c__bacilli	o__bacillales_a	f__planococcaceae	g__psychrobacillus	s__Psychrobacillus glaciei	GCF_008973485.1	11	11	0	11	2
d__bacteria	p__proteobacteria	c__gammaproteobacteria	o__xanthomonadales	f__xanthomonadaceae	g__pseudoxanthomonas	s__Pseudoxanthomonas suwonensis_B	GCF_000972865.1	1	1	0	1	1
d__bacteria	p__proteobacteria	c__gammaproteobacteria	o__xanthomonadales	f__xanthomonadaceae	g__pseudoxanthomonas	s__Pseudoxanthomonas suwonensis_A	GCF_000185965.1	2	2	0	2	2
d__bacteria	p__proteobacteria	c__gammaproteobacteria	o__ps1	f__thioglobaceae	g__pseudothioglobus	s__Pseudothioglobus singularis_A	GCF_003326015.1	1	1	0	1	1
d__bacteria	p__proteobacteria	c__gammaproteobacteria	o__ps1	f__thioglobaceae	g__pseudothioglobus	s__Pseudothioglobus singularis	GCF_001281385.1	1	1	0	1	1
d__bacteria	p__thermotogota	c__thermotogae	o__thermotogales	f__dsm-5069	g__pseudothermotoga_b	s__Pseudothermotoga_B profunda	GCF_000828675.1	1	1	0	1	1
d__bacteria	p__thermotogota	c__thermotogae	o__thermotogales	f__dsm-5069	g__pseudothermotoga_b	s__Pseudothermotoga_B elfii	GCF_000504085.1	1	1	0	1	1
d__bacteria	p__thermotogota	c__thermotogae	o__thermotogales	f__dsm-5069	g__pseudothermotoga_a	s__Pseudothermotoga_A hypogea	GCF_000816145.1	1	1	0	1	1
d__bacteria	p__thermotogota	c__thermotogae	o__thermotogales	f__dsm-5069	g__pseudothermotoga_a	s__Pseudothermotoga_A caldifontis	GCF_000828655.1	1	1	0	1	1
d__bacteria	p__thermotogota	c__thermotogae	o__thermotogales	f__dsm-5069	g__pseudothermotoga	s__Pseudothermotoga thermarum	GCF_000217815.1	1	1	0	1	1
d__bacteria	p__bacteroidota	c__bacteroidia	o__sphingobacteriales	f__sphingobacteriaceae	g__pseudosphingobacterium	s__Pseudosphingobacterium sp014334135	GCF_014334135.1	3	3	0	3	3
d__bacteria	p__proteobacteria	c__alphaproteobacteria	o__rhizobiales	f__xanthobacteraceae	g__pseudorhodoplanes	s__Pseudorhodoplanes sinuspersici	GCF_002119765.1	1	1	0	1	1
d__bacteria	p__proteobacteria	c__alphaproteobacteria	o__rhodobacterales	f__rhodobacteraceae	g__pseudorhodobacter	s__Pseudorhodobacter turbinis	GCF_005234135.1	4	4	0	4	1
d__bacteria	p__proteobacteria	c__alphaproteobacteria	o__rhizobiales	f__rhizobiaceae	g__pseudorhizobium	s__Pseudorhizobium flavum	GCF_902502825.2	3	3	0	3	1
d__bacteria	p__proteobacteria	c__alphaproteobacteria	o__rhodobacterales	f__rhodobacteraceae	g__pseudophaeobacter_a	s__Pseudophaeobacter_A gallaeciensis_A	GCF_001678945.1	4	0	4	4	4
d__bacteria	p__desulfobacterota	c__desulfuromonadia	o__geobacterales	f__pseudopelobacteraceae	g__pseudopelobacter	s__Pseudopelobacter propionicus	GCF_000015045.1	4	4	0	4	1
d__bacteria	p__proteobacteria	c__alphaproteobacteria	o__rhodobacterales	f__rhodobacteraceae	g__pseudooceanicola	s__Pseudooceanicola antarcticus_A	GCF_014899185.1	3	3	0	3	1
d__bacteria	p__proteobacteria	c__alphaproteobacteria	o__rhodobacterales	f__rhodobacteraceae	g__pseudooceanicola	s__Pseudooceanicola algae	GCF_003590145.2	3	3	0	3	1
d__bacteria	p__actinobacteriota	c__actinomycetia	o__mycobacteriales	f__pseudonocardiaceae	g__pseudonocardia	s__Pseudonocardia sp014235185	GCF_014235185.1	2	2	0	2	1
d__bacteria	p__actinobacteriota	c__actinomycetia	o__mycobacteriales	f__pseudonocardiaceae	g__pseudonocardia	s__Pseudonocardia sp001698125	GCF_001698125.1	3	3	0	3	1
d__bacteria	p__actinobacteriota	c__actinomycetia	o__mycobacteriales	f__pseudonocardiaceae	g__pseudonocardia	s__Pseudonocardia sp001420995	GCF_001420995.1	4	4	0	4	1
d__bacteria	p__actinobacteriota	c__actinomycetia	o__mycobacteriales	f__pseudonocardiaceae	g__pseudonocardia	s__Pseudonocardia sp001294645	GCF_001294645.1	3	3	0	3	1
d__bacteria	p__actinobacteriota	c__actinomycetia	o__mycobacteriales	f__pseudonocardiaceae	g__pseudonocardia	s__Pseudonocardia broussonetiae	GCF_013155125.1	2	2	0	2	1
d__bacteria	p__actinobacteriota	c__actinomycetia	o__mycobacteriales	f__pseudonocardiaceae	g__pseudonocardia	s__Pseudonocardia autotrophica	GCF_003945385.1	4	4	0	4	1
d__bacteria	p__proteobacteria	c__gammaproteobacteria	o__pseudomonadales	f__pseudomonadaceae	g__pseudomonas_q	s__Pseudomonas_Q sp013395055	GCF_013395055.1	4	4	0	4	1
d__bacteria	p__proteobacteria	c__gammaproteobacteria	o__pseudomonadales	f__pseudomonadaceae	g__pseudomonas_f	s__Pseudomonas_F sp003626975	GCF_003626975.1	5	5	0	5	1
d__bacteria	p__proteobacteria	c__gammaproteobacteria	o__pseudomonadales	f__pseudomonadaceae	g__pseudomonas_f	s__Pseudomonas_F sp003234055	GCF_012767755.2	4	4	0	4	1
d__bacteria	p__proteobacteria	c__gammaproteobacteria	o__pseudomonadales	f__pseudomonadaceae	g__pseudomonas_f	s__Pseudomonas_F sp001708505	GCF_001708505.1	5	5	0	5	1
d__bacteria	p__proteobacteria	c__gammaproteobacteria	o__pseudomonadales	f__pseudomonadaceae	g__pseudomonas_f	s__Pseudomonas_F resinovorans_A	GCF_000412695.1	5	5	0	5	1
d__bacteria	p__proteobacteria	c__gammaproteobacteria	o__pseudomonadales	f__pseudomonadaceae	g__pseudomonas_f	s__Pseudomonas_F lalkuanensis	GCF_008807375.1	5	5	0	5	1
d__bacteria	p__proteobacteria	c__gammaproteobacteria	o__pseudomonadales	f__pseudomonadaceae	g__pseudomonas_f	s__Pseudomonas_F furukawaii	GCF_002355475.1	5	5	0	5	1
d__bacteria	p__proteobacteria	c__gammaproteobacteria	o__pseudomonadales	f__pseudomonadaceae	g__pseudomonas_e	s__Pseudomonas_E yamanorum_B	GCF_013403585.1	5	5	0	5	1
d__bacteria	p__proteobacteria	c__gammaproteobacteria	o__pseudomonadales	f__pseudomonadaceae	g__pseudomonas_e	s__Pseudomonas_E viciae	GCF_004786035.1	5	5	0	5	1
d__bacteria	p__proteobacteria	c__gammaproteobacteria	o__pseudomonadales	f__pseudomonadaceae	g__pseudomonas_e	s__Pseudomonas_E versuta	GCF_001294575.1	8	8	0	8	1
d__bacteria	p__proteobacteria	c__gammaproteobacteria	o__pseudomonadales	f__pseudomonadaceae	g__pseudomonas_e	s__Pseudomonas_E trivialis_B	GCF_001186335.1	5	5	0	5	1
d__bacteria	p__proteobacteria	c__gammaproteobacteria	o__pseudomonadales	f__pseudomonadaceae	g__pseudomonas_e	s__Pseudomonas_E taetrolens	GCF_900475285.1	6	6	0	6	1
d__bacteria	p__proteobacteria	c__gammaproteobacteria	o__pseudomonadales	f__pseudomonadaceae	g__pseudomonas_e	s__Pseudomonas_E syringae_M	GCF_009176725.1	5	5	0	5	1
d__bacteria	p__proteobacteria	c__gammaproteobacteria	o__pseudomonadales	f__pseudomonadaceae	g__pseudomonas_e	s__Pseudomonas_E syringae_F	GCF_000452705.1	5	5	0	5	1
d__bacteria	p__proteobacteria	c__gammaproteobacteria	o__pseudomonadales	f__pseudomonadaceae	g__pseudomonas_e	s__Pseudomonas_E sp900585815	GCF_013201545.1	5	5	0	5	1
d__bacteria	p__proteobacteria	c__gammaproteobacteria	o__pseudomonadales	f__pseudomonadaceae	g__pseudomonas_e	s__Pseudomonas_E sp900187635	GCF_009834545.1	7	7	0	7	1
d__bacteria	p__proteobacteria	c__gammaproteobacteria	o__pseudomonadales	f__pseudomonadaceae	g__pseudomonas_e	s__Pseudomonas_E sp900187515	GCF_014268445.2	6	6	0	6	1
d__bacteria	p__proteobacteria	c__gammaproteobacteria	o__pseudomonadales	f__pseudomonadaceae	g__pseudomonas_e	s__Pseudomonas_E sp900101695	GCF_018417635.1	6	6	0	6	1
d__bacteria	p__proteobacteria	c__gammaproteobacteria	o__pseudomonadales	f__pseudomonadaceae	g__pseudomonas_e	s__Pseudomonas_E sp900005815	GCF_019139815.1	6	6	0	6	1
d__bacteria	p__proteobacteria	c__gammaproteobacteria	o__pseudomonadales	f__pseudomonadaceae	g__pseudomonas_e	s__Pseudomonas_E sp019139835	GCF_019139835.1	6	6	0	6	1
d__bacteria	p__proteobacteria	c__gammaproteobacteria	o__pseudomonadales	f__pseudomonadaceae	g__pseudomonas_e	s__Pseudomonas_E sp019139675	GCF_019139675.1	7	7	0	7	1
d__bacteria	p__proteobacteria	c__gammaproteobacteria	o__pseudomonadales	f__pseudomonadaceae	g__pseudomonas_e	s__Pseudomonas_E sp019139535	GCF_019139535.1	6	6	0	6	1
d__bacteria	p__proteobacteria	c__gammaproteobacteria	o__pseudomonadales	f__pseudomonadaceae	g__pseudomonas_e	s__Pseudomonas_E sp018325905	GCF_018325905.1	5	5	0	5	1
d__bacteria	p__proteobacteria	c__gammaproteobacteria	o__pseudomonadales	f__pseudomonadaceae	g__pseudomonas_e	s__Pseudomonas_E sp017968885	GCF_017968885.1	5	5	0	5	1
d__bacteria	p__proteobacteria	c__gammaproteobacteria	o__pseudomonadales	f__pseudomonadaceae	g__pseudomonas_e	s__Pseudomonas_E sp014270125	GCF_014268595.2	5	5	0	5	1
d__bacteria	p__proteobacteria	c__gammaproteobacteria	o__pseudomonadales	f__pseudomonadaceae	g__pseudomonas_e	s__Pseudomonas_E sp014268885	GCF_014268885.2	6	6	0	6	1
d__bacteria	p__proteobacteria	c__gammaproteobacteria	o__pseudomonadales	f__pseudomonadaceae	g__pseudomonas_e	s__Pseudomonas_E sp014268755	GCF_014268755.2	6	6	0	6	1
d__bacteria	p__proteobacteria	c__gammaproteobacteria	o__pseudomonadales	f__pseudomonadaceae	g__pseudomonas_e	s__Pseudomonas_E sp012985665	GCF_016925675.1	6	6	0	6	1
d__bacteria	p__proteobacteria	c__gammaproteobacteria	o__pseudomonadales	f__pseudomonadaceae	g__pseudomonas_e	s__Pseudomonas_E sp012975065	GCF_012975065.1	7	7	0	7	1
d__bacteria	p__proteobacteria	c__gammaproteobacteria	o__pseudomonadales	f__pseudomonadaceae	g__pseudomonas_e	s__Pseudomonas_E sp012935755	GCF_012935755.1	6	6	0	6	1
d__bacteria	p__proteobacteria	c__gammaproteobacteria	o__pseudomonadales	f__pseudomonadaceae	g__pseudomonas_e	s__Pseudomonas_E sp012935695	GCF_012935695.1	5	5	0	5	1
d__bacteria	p__proteobacteria	c__gammaproteobacteria	o__pseudomonadales	f__pseudomonadaceae	g__pseudomonas_e	s__Pseudomonas_E sp009866765	GCF_009866765.1	6	6	0	6	1
d__bacteria	p__proteobacteria	c__gammaproteobacteria	o__pseudomonadales	f__pseudomonadaceae	g__pseudomonas_e	s__Pseudomonas_E sp009834565	GCF_009834565.1	5	5	0	5	1
d__bacteria	p__proteobacteria	c__gammaproteobacteria	o__pseudomonadales	f__pseudomonadaceae	g__pseudomonas_e	s__Pseudomonas_E sp009834515	GCF_009834515.1	6	6	0	6	1
d__bacteria	p__proteobacteria	c__gammaproteobacteria	o__pseudomonadales	f__pseudomonadaceae	g__pseudomonas_e	s__Pseudomonas_E sp004803755	GCF_004803755.1	7	7	0	7	1
d__bacteria	p__proteobacteria	c__gammaproteobacteria	o__pseudomonadales	f__pseudomonadaceae	g__pseudomonas_e	s__Pseudomonas_E sp004214895	GCF_004214895.1	7	7	0	7	1
d__bacteria	p__proteobacteria	c__gammaproteobacteria	o__pseudomonadales	f__pseudomonadaceae	g__pseudomonas_e	s__Pseudomonas_E sp004124275	GCF_004124275.1	6	6	0	6	1
d__bacteria	p__proteobacteria	c__gammaproteobacteria	o__pseudomonadales	f__pseudomonadaceae	g__pseudomonas_e	s__Pseudomonas_E sp004011755	GCF_004011755.1	6	6	0	6	1
d__bacteria	p__proteobacteria	c__gammaproteobacteria	o__pseudomonadales	f__pseudomonadaceae	g__pseudomonas_e	s__Pseudomonas_E sp003852235	GCF_003852235.1	6	6	0	6	1
d__bacteria	p__proteobacteria	c__gammaproteobacteria	o__pseudomonadales	f__pseudomonadaceae	g__pseudomonas_e	s__Pseudomonas_E sp003851685	GCF_003851685.1	6	6	0	6	1
d__bacteria	p__proteobacteria	c__gammaproteobacteria	o__pseudomonadales	f__pseudomonadaceae	g__pseudomonas_e	s__Pseudomonas_E sp003595175	GCF_003595175.1	5	5	0	5	1
d__bacteria	p__proteobacteria	c__gammaproteobacteria	o__pseudomonadales	f__pseudomonadaceae	g__pseudomonas_e	s__Pseudomonas_E sp003151075	GCF_003151075.1	6	6	0	6	1
d__bacteria	p__proteobacteria	c__gammaproteobacteria	o__pseudomonadales	f__pseudomonadaceae	g__pseudomonas_e	s__Pseudomonas_E sp003014915	GCF_003852315.1	5	5	0	5	1
d__bacteria	p__proteobacteria	c__gammaproteobacteria	o__pseudomonadales	f__pseudomonadaceae	g__pseudomonas_e	s__Pseudomonas_E sp003013355	GCF_003612935.1	5	5	0	5	1
d__bacteria	p__proteobacteria	c__gammaproteobacteria	o__pseudomonadales	f__pseudomonadaceae	g__pseudomonas_e	s__Pseudomonas_E sp002901475	GCF_018326005.1	6	6	0	6	1
d__bacteria	p__proteobacteria	c__gammaproteobacteria	o__pseudomonadales	f__pseudomonadaceae	g__pseudomonas_e	s__Pseudomonas_E sp002874965	GCF_002874965.1	5	5	0	5	1
d__bacteria	p__proteobacteria	c__gammaproteobacteria	o__pseudomonadales	f__pseudomonadaceae	g__pseudomonas_e	s__Pseudomonas_E sp002753995	GCF_002753995.1	7	7	0	7	1
d__bacteria	p__proteobacteria	c__gammaproteobacteria	o__pseudomonadales	f__pseudomonadaceae	g__pseudomonas_e	s__Pseudomonas_E sp002356535	GCF_002356535.2	7	7	0	7	1
d__bacteria	p__proteobacteria	c__gammaproteobacteria	o__pseudomonadales	f__pseudomonadaceae	g__pseudomonas_e	s__Pseudomonas_E sp002163625	GCF_002163625.1	4	4	0	4	1
d__bacteria	p__proteobacteria	c__gammaproteobacteria	o__pseudomonadales	f__pseudomonadaceae	g__pseudomonas_e	s__Pseudomonas_E sp002112885	GCF_004006335.1	6	6	0	6	1
d__bacteria	p__proteobacteria	c__gammaproteobacteria	o__pseudomonadales	f__pseudomonadaceae	g__pseudomonas_e	s__Pseudomonas_E sp002029345	GCF_006094435.1	7	7	0	7	1
d__bacteria	p__proteobacteria	c__gammaproteobacteria	o__pseudomonadales	f__pseudomonadaceae	g__pseudomonas_e	s__Pseudomonas_E sp002025205	GCF_002025205.1	5	5	0	5	1
d__bacteria	p__proteobacteria	c__gammaproteobacteria	o__pseudomonadales	f__pseudomonadaceae	g__pseudomonas_e	s__Pseudomonas_E sp001705835	GCF_003850565.1	5	5	0	5	1
d__bacteria	p__proteobacteria	c__gammaproteobacteria	o__pseudomonadales	f__pseudomonadaceae	g__pseudomonas_e	s__Pseudomonas_E sp001655615	GCF_001655615.1	6	6	0	6	1
d__bacteria	p__proteobacteria	c__gammaproteobacteria	o__pseudomonadales	f__pseudomonadaceae	g__pseudomonas_e	s__Pseudomonas_E sp001655595	GCF_010448615.1	6	6	0	6	1
d__bacteria	p__proteobacteria	c__gammaproteobacteria	o__pseudomonadales	f__pseudomonadaceae	g__pseudomonas_e	s__Pseudomonas_E sp001547895	GCF_001547895.1	6	6	0	6	1
d__bacteria	p__proteobacteria	c__gammaproteobacteria	o__pseudomonadales	f__pseudomonadaceae	g__pseudomonas_e	s__Pseudomonas_E sp001422615	GCF_003627215.1	7	7	0	7	1
d__bacteria	p__proteobacteria	c__gammaproteobacteria	o__pseudomonadales	f__pseudomonadaceae	g__pseudomonas_e	s__Pseudomonas_E sp001259595	GCF_016861355.1	7	7	0	7	1
d__bacteria	p__proteobacteria	c__gammaproteobacteria	o__pseudomonadales	f__pseudomonadaceae	g__pseudomonas_e	s__Pseudomonas_E sp000931465	GCF_000931465.1	5	5	0	5	1
d__bacteria	p__proteobacteria	c__gammaproteobacteria	o__pseudomonadales	f__pseudomonadaceae	g__pseudomonas_e	s__Pseudomonas_E sp000829415	GCF_000829415.1	6	6	0	6	1
d__bacteria	p__proteobacteria	c__gammaproteobacteria	o__pseudomonadales	f__pseudomonadaceae	g__pseudomonas_e	s__Pseudomonas_E sp000242655	GCF_012935715.1	5	5	0	5	1
d__bacteria	p__proteobacteria	c__gammaproteobacteria	o__pseudomonadales	f__pseudomonadaceae	g__pseudomonas_e	s__Pseudomonas_E silesiensis	GCF_001661075.1	7	7	0	7	1
d__bacteria	p__proteobacteria	c__gammaproteobacteria	o__pseudomonadales	f__pseudomonadaceae	g__pseudomonas_e	s__Pseudomonas_E rhizosphaerae	GCF_000761155.1	6	6	0	6	1
d__bacteria	p__proteobacteria	c__gammaproteobacteria	o__pseudomonadales	f__pseudomonadaceae	g__pseudomonas_e	s__Pseudomonas_E putida_W	GCF_009883635.2	7	7	0	7	1
d__bacteria	p__proteobacteria	c__gammaproteobacteria	o__pseudomonadales	f__pseudomonadaceae	g__pseudomonas_e	s__Pseudomonas_E putida_V	GCF_005080685.1	6	6	0	6	1
d__bacteria	p__proteobacteria	c__gammaproteobacteria	o__pseudomonadales	f__pseudomonadaceae	g__pseudomonas_e	s__Pseudomonas_E putida_T	GCF_002741075.1	6	6	0	6	1
d__bacteria	p__proteobacteria	c__gammaproteobacteria	o__pseudomonadales	f__pseudomonadaceae	g__pseudomonas_e	s__Pseudomonas_E putida_S	GCF_003228315.1	6	6	0	6	1
d__bacteria	p__proteobacteria	c__gammaproteobacteria	o__pseudomonadales	f__pseudomonadaceae	g__pseudomonas_e	s__Pseudomonas_E putida_Q	GCF_000498395.2	7	7	0	7	1
d__bacteria	p__proteobacteria	c__gammaproteobacteria	o__pseudomonadales	f__pseudomonadaceae	g__pseudomonas_e	s__Pseudomonas_E putida_M	GCF_002736125.1	7	7	0	7	1
d__bacteria	p__proteobacteria	c__gammaproteobacteria	o__pseudomonadales	f__pseudomonadaceae	g__pseudomonas_e	s__Pseudomonas_E putida_J	GCF_002025705.1	7	7	0	7	1
d__bacteria	p__proteobacteria	c__gammaproteobacteria	o__pseudomonadales	f__pseudomonadaceae	g__pseudomonas_e	s__Pseudomonas_E putida_H	GCF_002356095.1	7	7	0	7	1
d__bacteria	p__proteobacteria	c__gammaproteobacteria	o__pseudomonadales	f__pseudomonadaceae	g__pseudomonas_e	s__Pseudomonas_E putida_B	GCF_001636055.1	6	6	0	6	1
d__bacteria	p__proteobacteria	c__gammaproteobacteria	o__pseudomonadales	f__pseudomonadaceae	g__pseudomonas_e	s__Pseudomonas_E putida_A	GCF_004683905.1	6	6	0	6	1
d__bacteria	p__proteobacteria	c__gammaproteobacteria	o__pseudomonadales	f__pseudomonadaceae	g__pseudomonas_e	s__Pseudomonas_E putida	GCF_000412675.1	7	7	0	7	1
d__bacteria	p__proteobacteria	c__gammaproteobacteria	o__pseudomonadales	f__pseudomonadaceae	g__pseudomonas_e	s__Pseudomonas_E protegens_A	GCF_003363755.1	5	5	0	5	1
d__bacteria	p__proteobacteria	c__gammaproteobacteria	o__pseudomonadales	f__pseudomonadaceae	g__pseudomonas_e	s__Pseudomonas_E protegens	GCF_000397205.1	5	5	0	5	1
d__bacteria	p__proteobacteria	c__gammaproteobacteria	o__pseudomonadales	f__pseudomonadaceae	g__pseudomonas_e	s__Pseudomonas_E parafulva_B	GCF_002021815.1	7	7	0	7	1
d__bacteria	p__proteobacteria	c__gammaproteobacteria	o__pseudomonadales	f__pseudomonadaceae	g__pseudomonas_e	s__Pseudomonas_E parafulva_A	GCF_000800255.1	6	6	0	6	1
d__bacteria	p__proteobacteria	c__gammaproteobacteria	o__pseudomonadales	f__pseudomonadaceae	g__pseudomonas_e	s__Pseudomonas_E orientalis_A	GCF_002934065.1	6	6	0	6	1
d__bacteria	p__proteobacteria	c__gammaproteobacteria	o__pseudomonadales	f__pseudomonadaceae	g__pseudomonas_e	s__Pseudomonas_E monteilii_C	GCF_014269025.2	7	7	0	7	1
d__bacteria	p__proteobacteria	c__gammaproteobacteria	o__pseudomonadales	f__pseudomonadaceae	g__pseudomonas_e	s__Pseudomonas_E mendocina_C	GCF_003008615.1	4	4	0	4	1
d__bacteria	p__proteobacteria	c__gammaproteobacteria	o__pseudomonadales	f__pseudomonadaceae	g__pseudomonas_e	s__Pseudomonas_E mendocina	GCF_900636545.1	4	4	0	4	1
d__bacteria	p__proteobacteria	c__gammaproteobacteria	o__pseudomonadales	f__pseudomonadaceae	g__pseudomonas_e	s__Pseudomonas_E kribbensis	GCF_003352185.1	6	6	0	6	1
d__bacteria	p__proteobacteria	c__gammaproteobacteria	o__pseudomonadales	f__pseudomonadaceae	g__pseudomonas_e	s__Pseudomonas_E koreensis_C	GCF_001605965.1	5	5	0	5	1
d__bacteria	p__proteobacteria	c__gammaproteobacteria	o__pseudomonadales	f__pseudomonadaceae	g__pseudomonas_e	s__Pseudomonas_E kilonensis_B	GCF_009601685.2	5	5	0	5	1
d__bacteria	p__proteobacteria	c__gammaproteobacteria	o__pseudomonadales	f__pseudomonadaceae	g__pseudomonas_e	s__Pseudomonas_E hunanensis	GCF_003671955.1	8	8	0	8	1
d__bacteria	p__proteobacteria	c__gammaproteobacteria	o__pseudomonadales	f__pseudomonadaceae	g__pseudomonas_e	s__Pseudomonas_E gozinkensis	GCF_014863585.1	6	6	0	6	1
d__bacteria	p__proteobacteria	c__gammaproteobacteria	o__pseudomonadales	f__pseudomonadaceae	g__pseudomonas_e	s__Pseudomonas_E glycinae	GCF_001594225.2	5	5	0	5	1
d__bacteria	p__proteobacteria	c__gammaproteobacteria	o__pseudomonadales	f__pseudomonadaceae	g__pseudomonas_e	s__Pseudomonas_E fulva_B	GCF_000213805.1	4	4	0	4	1
d__bacteria	p__proteobacteria	c__gammaproteobacteria	o__pseudomonadales	f__pseudomonadaceae	g__pseudomonas_e	s__Pseudomonas_E frederiksbergensis_B	GCF_001874645.1	7	7	0	7	1
d__bacteria	p__proteobacteria	c__gammaproteobacteria	o__pseudomonadales	f__pseudomonadaceae	g__pseudomonas_e	s__Pseudomonas_E fluorescens_X	GCF_000730425.1	6	6	0	6	1
d__bacteria	p__proteobacteria	c__gammaproteobacteria	o__pseudomonadales	f__pseudomonadaceae	g__pseudomonas_e	s__Pseudomonas_E fluorescens_T	GCF_019141525.1	5	5	0	5	1
d__bacteria	p__proteobacteria	c__gammaproteobacteria	o__pseudomonadales	f__pseudomonadaceae	g__pseudomonas_e	s__Pseudomonas_E fluorescens_E	GCF_001307155.1	6	6	0	5	1
d__bacteria	p__proteobacteria	c__gammaproteobacteria	o__pseudomonadales	f__pseudomonadaceae	g__pseudomonas_e	s__Pseudomonas_E fluorescens_BW	GCF_018502625.1	6	6	0	6	1
d__bacteria	p__proteobacteria	c__gammaproteobacteria	o__pseudomonadales	f__pseudomonadaceae	g__pseudomonas_e	s__Pseudomonas_E fluorescens_BT	GCF_012974785.1	6	6	0	6	1
d__bacteria	p__proteobacteria	c__gammaproteobacteria	o__pseudomonadales	f__pseudomonadaceae	g__pseudomonas_e	s__Pseudomonas_E fluorescens_BG	GCF_900636825.1	6	6	0	6	1
d__bacteria	p__proteobacteria	c__gammaproteobacteria	o__pseudomonadales	f__pseudomonadaceae	g__pseudomonas_e	s__Pseudomonas_E fluorescens_BC	GCF_014268495.2	6	6	0	6	1
d__bacteria	p__proteobacteria	c__gammaproteobacteria	o__pseudomonadales	f__pseudomonadaceae	g__pseudomonas_e	s__Pseudomonas_E fluorescens_BB	GCF_003851495.1	6	6	0	6	1
d__bacteria	p__proteobacteria	c__gammaproteobacteria	o__pseudomonadales	f__pseudomonadaceae	g__pseudomonas_e	s__Pseudomonas_E fluorescens_BA	GCF_003626995.1	5	5	0	5	1
d__bacteria	p__proteobacteria	c__gammaproteobacteria	o__pseudomonadales	f__pseudomonadaceae	g__pseudomonas_e	s__Pseudomonas_E fluorescens_B	GCF_000293885.2	6	6	0	6	1
d__bacteria	p__proteobacteria	c__gammaproteobacteria	o__pseudomonadales	f__pseudomonadaceae	g__pseudomonas_e	s__Pseudomonas_E fluorescens_AP	GCF_013407925.2	6	6	0	6	1
d__bacteria	p__proteobacteria	c__gammaproteobacteria	o__pseudomonadales	f__pseudomonadaceae	g__pseudomonas_e	s__Pseudomonas_E fluorescens_AN	GCF_001708445.1	1	1	0	1	1
d__bacteria	p__proteobacteria	c__gammaproteobacteria	o__pseudomonadales	f__pseudomonadaceae	g__pseudomonas_e	s__Pseudomonas_E fluorescens_AA	GCF_001307275.1	5	5	0	5	1
d__bacteria	p__proteobacteria	c__gammaproteobacteria	o__pseudomonadales	f__pseudomonadaceae	g__pseudomonas_e	s__Pseudomonas_E eucalypticola	GCF_013374995.1	8	8	0	8	1
d__bacteria	p__proteobacteria	c__gammaproteobacteria	o__pseudomonadales	f__pseudomonadaceae	g__pseudomonas_e	s__Pseudomonas_E entomophila_C	GCF_018417595.1	7	7	0	7	1
d__bacteria	p__proteobacteria	c__gammaproteobacteria	o__pseudomonadales	f__pseudomonadaceae	g__pseudomonas_e	s__Pseudomonas_E entomophila	GCF_000026105.1	7	7	0	7	1
d__bacteria	p__proteobacteria	c__gammaproteobacteria	o__pseudomonadales	f__pseudomonadaceae	g__pseudomonas_e	s__Pseudomonas_E cremoricolorata_A	GCF_000759535.1	6	6	0	6	1
d__bacteria	p__proteobacteria	c__gammaproteobacteria	o__pseudomonadales	f__pseudomonadaceae	g__pseudomonas_e	s__Pseudomonas_E cichorii_C	GCF_018968705.1	6	6	0	6	1
d__bacteria	p__proteobacteria	c__gammaproteobacteria	o__pseudomonadales	f__pseudomonadaceae	g__pseudomonas_e	s__Pseudomonas_E cichorii	GCF_018343775.1	6	6	0	6	1
d__bacteria	p__proteobacteria	c__gammaproteobacteria	o__pseudomonadales	f__pseudomonadaceae	g__pseudomonas_e	s__Pseudomonas_E chlororaphis_F	GCF_003850345.1	5	5	0	5	1
d__bacteria	p__proteobacteria	c__gammaproteobacteria	o__pseudomonadales	f__pseudomonadaceae	g__pseudomonas_e	s__Pseudomonas_E chlororaphis_E	GCF_001023535.1	5	5	0	5	1
d__bacteria	p__proteobacteria	c__gammaproteobacteria	o__pseudomonadales	f__pseudomonadaceae	g__pseudomonas_e	s__Pseudomonas_E chlororaphis	GCF_003945765.1	5	5	0	5	1
d__bacteria	p__proteobacteria	c__gammaproteobacteria	o__pseudomonadales	f__pseudomonadaceae	g__pseudomonas_e	s__Pseudomonas_E cerasi	GCF_900074915.1	5	5	0	5	1
d__bacteria	p__proteobacteria	c__gammaproteobacteria	o__pseudomonadales	f__pseudomonadaceae	g__pseudomonas_e	s__Pseudomonas_E campi	GCF_013200955.2	3	3	0	3	1
d__bacteria	p__proteobacteria	c__gammaproteobacteria	o__pseudomonadales	f__pseudomonadaceae	g__pseudomonas_e	s__Pseudomonas_E brassicacearum_A	GCF_000585995.1	5	5	0	5	1
d__bacteria	p__proteobacteria	c__gammaproteobacteria	o__pseudomonadales	f__pseudomonadaceae	g__pseudomonas_e	s__Pseudomonas_E bijieensis	GCF_013347965.1	5	5	0	5	1
d__bacteria	p__proteobacteria	c__gammaproteobacteria	o__pseudomonadales	f__pseudomonadaceae	g__pseudomonas_e	s__Pseudomonas_E azotoformans_B	GCF_002007785.1	5	5	0	5	1
d__bacteria	p__proteobacteria	c__gammaproteobacteria	o__pseudomonadales	f__pseudomonadaceae	g__pseudomonas_e	s__Pseudomonas_E azotoformans_A	GCF_001579805.1	6	6	0	6	1
d__bacteria	p__proteobacteria	c__gammaproteobacteria	o__pseudomonadales	f__pseudomonadaceae	g__pseudomonas_e	s__Pseudomonas_E antarctica_A	GCF_001647715.1	6	6	0	6	1
d__bacteria	p__proteobacteria	c__gammaproteobacteria	o__pseudomonadales	f__pseudomonadaceae	g__pseudomonas_e	s__Pseudomonas_E allokribbensis	GCF_014863605.1	6	6	0	6	1
d__bacteria	p__proteobacteria	c__gammaproteobacteria	o__pseudomonadales	f__pseudomonadaceae	g__pseudomonas_e	s__Pseudomonas_E alkylphenolica	GCF_000746525.1	6	6	0	6	1
d__bacteria	p__proteobacteria	c__gammaproteobacteria	o__pseudomonadales	f__pseudomonadaceae	g__pseudomonas_e	s__Pseudomonas_E alcaliphila_B	GCF_001941865.1	4	4	0	4	1
d__bacteria	p__proteobacteria	c__gammaproteobacteria	o__pseudomonadales	f__pseudomonadaceae	g__pseudomonas_d	s__Pseudomonas_D sp012844345	GCF_012844345.1	4	4	0	4	1
d__bacteria	p__proteobacteria	c__gammaproteobacteria	o__pseudomonadales	f__pseudomonadaceae	g__pseudomonas_c	s__Pseudomonas_C sp002342705	GCF_008807395.1	4	4	0	4	1
d__bacteria	p__proteobacteria	c__gammaproteobacteria	o__pseudomonadales	f__pseudomonadaceae	g__pseudomonas_b	s__Pseudomonas_B psychrotolerans_B	GCF_006384975.1	5	5	0	5	1
d__bacteria	p__proteobacteria	c__gammaproteobacteria	o__pseudomonadales	f__pseudomonadaceae	g__pseudomonas_b	s__Pseudomonas_B oryzihabitans_E	GCF_001518815.1	5	5	0	5	1
d__bacteria	p__proteobacteria	c__gammaproteobacteria	o__pseudomonadales	f__pseudomonadaceae	g__pseudomonas_b	s__Pseudomonas_B oryzihabitans_D	GCF_014522265.1	5	5	0	5	1
d__bacteria	p__proteobacteria	c__gammaproteobacteria	o__pseudomonadales	f__pseudomonadaceae	g__pseudomonas_a	s__Pseudomonas_A stutzeri_R	GCF_009789555.1	4	4	0	4	1
d__bacteria	p__proteobacteria	c__gammaproteobacteria	o__pseudomonadales	f__pseudomonadaceae	g__pseudomonas_a	s__Pseudomonas_A stutzeri_D	GCF_000590475.1	4	4	0	4	1
d__bacteria	p__proteobacteria	c__gammaproteobacteria	o__pseudomonadales	f__pseudomonadaceae	g__pseudomonas_a	s__Pseudomonas_A stutzeri_AI	GCF_018138085.1	4	4	0	4	1
d__bacteria	p__proteobacteria	c__gammaproteobacteria	o__pseudomonadales	f__pseudomonadaceae	g__pseudomonas_a	s__Pseudomonas_A stutzeri_AE	GCF_000327065.1	4	4	0	4	1
d__bacteria	p__proteobacteria	c__gammaproteobacteria	o__pseudomonadales	f__pseudomonadaceae	g__pseudomonas_a	s__Pseudomonas_A stutzeri_AC	GCF_015291885.1	4	4	0	4	1
d__bacteria	p__proteobacteria	c__gammaproteobacteria	o__pseudomonadales	f__pseudomonadaceae	g__pseudomonas_a	s__Pseudomonas_A stutzeri_A	GCF_000661915.1	4	4	0	4	1
d__bacteria	p__proteobacteria	c__gammaproteobacteria	o__pseudomonadales	f__pseudomonadaceae	g__pseudomonas_a	s__Pseudomonas_A stutzeri	GCF_000219605.1	4	4	0	4	1
d__bacteria	p__proteobacteria	c__gammaproteobacteria	o__pseudomonadales	f__pseudomonadaceae	g__pseudomonas_a	s__Pseudomonas_A sp003205815	GCF_003205815.1	4	4	0	4	1
d__bacteria	p__proteobacteria	c__gammaproteobacteria	o__pseudomonadales	f__pseudomonadaceae	g__pseudomonas_a	s__Pseudomonas_A balearica	GCF_000818015.1	4	4	0	4	1
d__bacteria	p__proteobacteria	c__gammaproteobacteria	o__pseudomonadales	f__pseudomonadaceae	g__pseudomonas	s__Pseudomonas sp016919445	GCF_016919445.1	4	4	0	4	1
d__bacteria	p__proteobacteria	c__gammaproteobacteria	o__pseudomonadales	f__pseudomonadaceae	g__pseudomonas	s__Pseudomonas sp009189165	GCF_009189165.1	6	6	0	6	1
d__bacteria	p__proteobacteria	c__gammaproteobacteria	o__pseudomonadales	f__pseudomonadaceae	g__pseudomonas	s__Pseudomonas sp000349845	GCF_000349845.1	5	5	0	5	1
d__bacteria	p__proteobacteria	c__gammaproteobacteria	o__pseudomonadales	f__pseudomonadaceae	g__pseudomonas	s__Pseudomonas knackmussii	GCF_000689415.1	4	4	0	4	1
d__bacteria	p__proteobacteria	c__gammaproteobacteria	o__pseudomonadales	f__pseudomonadaceae	g__pseudomonas	s__Pseudomonas aeruginosa_A	GCF_000017205.1	4	4	0	4	1
d__bacteria	p__proteobacteria	c__gammaproteobacteria	o__pseudomonadales	f__pseudomonadaceae	g__pseudomonas	s__Pseudomonas aeruginosa	GCF_001457615.1	4	4	0	4	1
d__bacteria	p__proteobacteria	c__gammaproteobacteria	o__xanthomonadales	f__rhodanobacteraceae	g__pseudolysobacter	s__Pseudolysobacter antarcticus	GCF_004168365.1	2	2	0	2	1
d__bacteria	p__fusobacteriota	c__fusobacteriia	o__fusobacteriales	f__leptotrichiaceae	g__pseudoleptotrichia	s__Pseudoleptotrichia goodfellowii	GCF_007990505.1	4	4	0	4	1
d__bacteria	p__proteobacteria	c__alphaproteobacteria	o__rhizobiales	f__xanthobacteraceae	g__pseudolabrys	s__Pseudolabrys sp005153485	GCF_005153485.1	1	1	0	1	1
d__bacteria	p__proteobacteria	c__gammaproteobacteria	o__pseudomonadales	f__pseudohongiellaceae	g__pseudohongiella	s__Pseudohongiella spirulinae	GCF_001444425.1	2	2	0	2	1
d__bacteria	p__proteobacteria	c__gammaproteobacteria	o__francisellales	f__francisellaceae	g__pseudofrancisella	s__Pseudofrancisella frigiditurris	GCF_001880225.1	3	3	0	3	1
d__bacteria	p__proteobacteria	c__gammaproteobacteria	o__burkholderiales	f__burkholderiaceae	g__pseudoduganella	s__Pseudoduganella sp001191005	GCF_001191005.1	7	7	0	7	1
d__bacteria	p__proteobacteria	c__gammaproteobacteria	o__burkholderiales	f__burkholderiaceae	g__pseudoduganella	s__Pseudoduganella plicata	GCF_004421005.1	7	7	0	7	2
d__bacteria	p__proteobacteria	c__gammaproteobacteria	o__burkholderiales	f__burkholderiaceae	g__pseudoduganella	s__Pseudoduganella armeniaca	GCF_003028855.1	7	7	0	7	2
d__bacteria	p__proteobacteria	c__gammaproteobacteria	o__burkholderiales	f__burkholderiaceae	g__pseudoduganella	s__Pseudoduganella albidiflava	GCF_004322755.1	8	8	0	8	3
d__bacteria	p__desulfobacterota_i	c__desulfovibrionia	o__desulfovibrionales	f__desulfovibrionaceae	g__pseudodesulfovibrio	s__Pseudodesulfovibrio sp012516435	GCF_012516435.1	4	4	0	4	1
d__bacteria	p__desulfobacterota_i	c__desulfovibrionia	o__desulfovibrionales	f__desulfovibrionaceae	g__pseudodesulfovibrio	s__Pseudodesulfovibrio sp008001235	GCF_008001235.1	4	4	0	4	1
d__bacteria	p__desulfobacterota_i	c__desulfovibrionia	o__desulfovibrionales	f__desulfovibrionaceae	g__pseudodesulfovibrio	s__Pseudodesulfovibrio profundus	GCF_900217235.1	3	3	0	3	1
d__bacteria	p__desulfobacterota_i	c__desulfovibrionia	o__desulfovibrionales	f__desulfovibrionaceae	g__pseudodesulfovibrio	s__Pseudodesulfovibrio mercurii	GCF_000189295.2	2	2	0	2	1
d__bacteria	p__desulfobacterota_i	c__desulfovibrionia	o__desulfovibrionales	f__desulfovibrionaceae	g__pseudodesulfovibrio	s__Pseudodesulfovibrio indicus	GCF_001563225.1	1	1	0	1	1
d__bacteria	p__desulfobacterota_i	c__desulfovibrionia	o__desulfovibrionales	f__desulfovibrionaceae	g__pseudodesulfovibrio	s__Pseudodesulfovibrio cashew	GCF_009762795.1	3	3	0	3	1
d__bacteria	p__desulfobacterota_i	c__desulfovibrionia	o__desulfovibrionales	f__desulfovibrionaceae	g__pseudodesulfovibrio	s__Pseudodesulfovibrio aespoeensis	GCF_000176915.2	2	2	0	2	1
d__bacteria	p__firmicutes_a	c__clostridia	o__acetivibrionales	f__dsm-27016	g__pseudoclostridium	s__Pseudoclostridium thermosuccinogenes	GCF_002896855.1	4	4	0	4	4
d__bacteria	p__firmicutes_a	c__clostridia	o__lachnospirales	f__lachnospiraceae	g__pseudobutyrivibrio	s__Pseudobutyrivibrio xylanivorans_A	GCF_008935055.1	5	5	0	5	3
d__bacteria	p__bdellovibrionota	c__bdellovibrionia	o__bdellovibrionales	f__bdellovibrionaceae	g__pseudobdellovibrio	s__Pseudobdellovibrio exovorus	GCF_000348725.1	1	1	0	1	1
d__bacteria	p__bacteroidota	c__bacteroidia	o__chitinophagales	f__chitinophagaceae	g__pseudobacter	s__Pseudobacter ginsenosidimutans	GCF_007970185.1	2	2	0	2	1
d__bacteria	p__proteobacteria	c__gammaproteobacteria	o__enterobacterales	f__alteromonadaceae	g__pseudoalteromonas	s__Pseudoalteromonas xiamenensis	GCF_017638925.1	8	8	0	8	8
d__bacteria	p__proteobacteria	c__gammaproteobacteria	o__enterobacterales	f__alteromonadaceae	g__pseudoalteromonas	s__Pseudoalteromonas viridis	GCF_017742995.1	10	10	0	10	10
d__bacteria	p__proteobacteria	c__gammaproteobacteria	o__enterobacterales	f__alteromonadaceae	g__pseudoalteromonas	s__Pseudoalteromonas tunicata	GCF_002310815.1	10	10	0	10	10
d__bacteria	p__proteobacteria	c__gammaproteobacteria	o__enterobacterales	f__alteromonadaceae	g__pseudoalteromonas	s__Pseudoalteromonas translucida	GCF_001465295.1	9	9	0	9	9
d__bacteria	p__proteobacteria	c__gammaproteobacteria	o__enterobacterales	f__alteromonadaceae	g__pseudoalteromonas	s__Pseudoalteromonas tetraodonis	GCF_002310835.1	8	8	0	8	8
d__bacteria	p__proteobacteria	c__gammaproteobacteria	o__enterobacterales	f__alteromonadaceae	g__pseudoalteromonas	s__Pseudoalteromonas spongiae	GCF_000238255.3	7	7	0	7	7
d__bacteria	p__proteobacteria	c__gammaproteobacteria	o__enterobacterales	f__alteromonadaceae	g__pseudoalteromonas	s__Pseudoalteromonas sp009176705	GCF_009176705.1	9	9	0	9	9
d__bacteria	p__proteobacteria	c__gammaproteobacteria	o__enterobacterales	f__alteromonadaceae	g__pseudoalteromonas	s__Pseudoalteromonas sp002850255	GCF_002850255.1	9	9	0	9	6
d__bacteria	p__proteobacteria	c__gammaproteobacteria	o__enterobacterales	f__alteromonadaceae	g__pseudoalteromonas	s__Pseudoalteromonas sp002685175	GCF_013391845.1	8	8	0	8	8
d__bacteria	p__proteobacteria	c__gammaproteobacteria	o__enterobacterales	f__alteromonadaceae	g__pseudoalteromonas	s__Pseudoalteromonas sp002591815	GCF_016695175.1	9	9	0	9	8
d__bacteria	p__proteobacteria	c__gammaproteobacteria	o__enterobacterales	f__alteromonadaceae	g__pseudoalteromonas	s__Pseudoalteromonas sp001974855	GCF_004328665.1	6	6	0	6	6
d__bacteria	p__proteobacteria	c__gammaproteobacteria	o__enterobacterales	f__alteromonadaceae	g__pseudoalteromonas	s__Pseudoalteromonas sp001282135	GCF_004014715.1	10	10	0	10	10
d__bacteria	p__proteobacteria	c__gammaproteobacteria	o__enterobacterales	f__alteromonadaceae	g__pseudoalteromonas	s__Pseudoalteromonas shioyasakiensis_A	GCF_019134595.1	8	8	0	8	8
d__bacteria	p__proteobacteria	c__gammaproteobacteria	o__enterobacterales	f__alteromonadaceae	g__pseudoalteromonas	s__Pseudoalteromonas ruthenica	GCF_008808095.1	7	7	0	7	7
d__bacteria	p__proteobacteria	c__gammaproteobacteria	o__enterobacterales	f__alteromonadaceae	g__pseudoalteromonas	s__Pseudoalteromonas rubra_D	GCF_005886805.2	10	10	0	10	9
d__bacteria	p__proteobacteria	c__gammaproteobacteria	o__enterobacterales	f__alteromonadaceae	g__pseudoalteromonas	s__Pseudoalteromonas rubra_B	GCF_001482385.1	10	10	0	10	9
d__bacteria	p__proteobacteria	c__gammaproteobacteria	o__enterobacterales	f__alteromonadaceae	g__pseudoalteromonas	s__Pseudoalteromonas piscicida_A	GCF_002208135.1	9	9	0	9	9
d__bacteria	p__proteobacteria	c__gammaproteobacteria	o__enterobacterales	f__alteromonadaceae	g__pseudoalteromonas	s__Pseudoalteromonas piratica	GCF_000788395.1	7	7	0	7	7
d__bacteria	p__proteobacteria	c__gammaproteobacteria	o__enterobacterales	f__alteromonadaceae	g__pseudoalteromonas	s__Pseudoalteromonas phenolica	GCF_001444405.1	9	9	0	9	1
d__bacteria	p__proteobacteria	c__gammaproteobacteria	o__enterobacterales	f__alteromonadaceae	g__pseudoalteromonas	s__Pseudoalteromonas nigrifaciens	GCF_002221505.1	9	9	0	9	9
d__bacteria	p__proteobacteria	c__gammaproteobacteria	o__enterobacterales	f__alteromonadaceae	g__pseudoalteromonas	s__Pseudoalteromonas luteoviolacea_G	GCF_001750165.1	12	11	1	12	12
d__bacteria	p__proteobacteria	c__gammaproteobacteria	o__enterobacterales	f__alteromonadaceae	g__pseudoalteromonas	s__Pseudoalteromonas espejiana	GCF_002221525.1	8	8	0	8	8
d__bacteria	p__proteobacteria	c__gammaproteobacteria	o__enterobacterales	f__alteromonadaceae	g__pseudoalteromonas	s__Pseudoalteromonas arctica	GCF_000238395.3	9	9	0	9	9
d__bacteria	p__actinobacteriota	c__actinomycetia	o__actinomycetales	f__micrococcaceae	g__pseudarthrobacter	s__Pseudarthrobacter sulfonivorans_A	GCF_001484605.1	5	1	4	5	5
d__bacteria	p__actinobacteriota	c__actinomycetia	o__actinomycetales	f__micrococcaceae	g__pseudarthrobacter	s__Pseudarthrobacter sp014217545	GCF_014217545.1	4	1	3	4	4
d__bacteria	p__actinobacteriota	c__actinomycetia	o__actinomycetales	f__micrococcaceae	g__pseudarthrobacter	s__Pseudarthrobacter sp006517815	GCF_006517815.1	5	3	2	5	5
d__bacteria	p__actinobacteriota	c__actinomycetia	o__actinomycetales	f__micrococcaceae	g__pseudarthrobacter	s__Pseudarthrobacter sp002953935	GCF_002953935.1	4	3	1	4	4
d__bacteria	p__actinobacteriota	c__actinomycetia	o__actinomycetales	f__micrococcaceae	g__pseudarthrobacter	s__Pseudarthrobacter sp002929755	GCF_006517235.1	4	2	2	4	4
d__bacteria	p__actinobacteriota	c__actinomycetia	o__actinomycetales	f__micrococcaceae	g__pseudarthrobacter	s__Pseudarthrobacter psychrotolerans	GCF_009911795.1	5	3	2	5	5
d__bacteria	p__actinobacteriota	c__actinomycetia	o__actinomycetales	f__micrococcaceae	g__pseudarthrobacter	s__Pseudarthrobacter phenanthrenivorans	GCF_000189535.1	4	1	3	4	4
d__bacteria	p__actinobacteriota	c__actinomycetia	o__actinomycetales	f__micrococcaceae	g__pseudarthrobacter	s__Pseudarthrobacter luteus_A	GCF_014764445.1	5	1	4	5	5
d__bacteria	p__actinobacteriota	c__actinomycetia	o__actinomycetales	f__micrococcaceae	g__pseudarthrobacter	s__Pseudarthrobacter chlorophenolicus	GCF_000022025.1	5	1	4	5	5
d__bacteria	p__cyanobacteria	c__cyanobacteriia	o__pseudanabaenales	f__pseudanabaenaceae	g__pseudanabaena	s__Pseudanabaena sp003967015	GCF_003967015.1	3	3	0	2	1
d__bacteria	p__proteobacteria	c__gammaproteobacteria	o__enterobacterales	f__enterobacteriaceae	g__providencia	s__Providencia vermicola_A	GCF_010748935.1	7	7	0	7	2
d__bacteria	p__proteobacteria	c__gammaproteobacteria	o__enterobacterales	f__enterobacteriaceae	g__providencia	s__Providencia rettgeri_F	GCF_013702265.1	7	7	0	7	2
d__bacteria	p__proteobacteria	c__gammaproteobacteria	o__enterobacterales	f__enterobacteriaceae	g__providencia	s__Providencia rettgeri_D	GCF_013255915.1	7	7	0	7	2
d__bacteria	p__proteobacteria	c__gammaproteobacteria	o__enterobacterales	f__enterobacteriaceae	g__providencia	s__Providencia rettgeri_A	GCF_001874625.1	7	7	0	7	2
d__bacteria	p__proteobacteria	c__gammaproteobacteria	o__enterobacterales	f__enterobacteriaceae	g__providencia	s__Providencia huaxiensis	GCF_002843235.3	7	7	0	7	2
d__bacteria	p__chlamydiota	c__chlamydiia	o__chlamydiales	f__parachlamydiaceae	g__protochlamydia	s__Protochlamydia naegleriophila	GCF_001499655.1	4	4	0	4	1
d__bacteria	p__chlamydiota	c__chlamydiia	o__chlamydiales	f__parachlamydiaceae	g__protochlamydia	s__Protochlamydia amoebophila	GCF_000011565.2	3	3	0	3	2
d__bacteria	p__proteobacteria	c__gammaproteobacteria	o__enterobacterales	f__enterobacteriaceae	g__proteus	s__Proteus vulgaris_B	GCF_011045815.1	7	7	0	7	1
d__bacteria	p__proteobacteria	c__gammaproteobacteria	o__enterobacterales	f__enterobacteriaceae	g__proteus	s__Proteus sp011046025	GCF_011046025.1	7	7	0	6	2
d__bacteria	p__proteobacteria	c__gammaproteobacteria	o__enterobacterales	f__enterobacteriaceae	g__proteus	s__Proteus sp003144505	GCF_009914335.1	7	7	0	7	2
d__bacteria	p__proteobacteria	c__gammaproteobacteria	o__enterobacterales	f__enterobacteriaceae	g__proteus	s__Proteus mirabilis_B	GCF_016647575.1	7	7	0	7	1
d__bacteria	p__proteobacteria	c__gammaproteobacteria	o__enterobacterales	f__enterobacteriaceae	g__proteus	s__Proteus cibarius	GCF_011045835.1	7	7	0	7	1
d__bacteria	p__bacteroidota	c__bacteroidia	o__bacteroidales	f__dysgonomonadaceae	g__proteiniphilum	s__Proteiniphilum saccharofermentans	GCF_900095135.1	2	2	0	2	1
d__bacteria	p__actinobacteriota	c__actinomycetia	o__actinomycetales	f__microbacteriaceae	g__protaetiibacter	s__Protaetiibacter sp014483895	GCF_014483895.1	1	1	0	1	1
d__bacteria	p__actinobacteriota	c__actinomycetia	o__actinomycetales	f__microbacteriaceae	g__protaetiibacter	s__Protaetiibacter sp011751905	GCF_011751865.2	2	2	0	2	1
d__bacteria	p__actinobacteriota	c__actinomycetia	o__actinomycetales	f__microbacteriaceae	g__protaetiibacter	s__Protaetiibacter larvae	GCF_008365275.1	1	1	0	1	1
d__bacteria	p__actinobacteriota	c__actinomycetia	o__actinomycetales	f__microbacteriaceae	g__protaetiibacter	s__Protaetiibacter intestinalis	GCF_003627075.1	1	1	0	1	1
d__bacteria	p__bacteroidota	c__chlorobia	o__chlorobiales	f__chlorobiaceae	g__prosthecochloris	s__Prosthecochloris sp002113825	GCF_002113825.1	2	2	0	2	1
d__bacteria	p__bacteroidota	c__chlorobia	o__chlorobiales	f__chlorobiaceae	g__prosthecochloris	s__Prosthecochloris aestuarii	GCF_000020625.1	1	1	0	1	1
d__bacteria	p__actinobacteriota	c__actinomycetia	o__propionibacteriales	f__propionibacteriaceae	g__propionimicrobium	s__Propionimicrobium sp900155645	GCF_900155645.1	2	2	0	2	1
d__bacteria	p__actinobacteriota	c__actinomycetia	o__propionibacteriales	f__propionibacteriaceae	g__propionibacterium	s__Propionibacterium freudenreichii	GCF_000940845.1	2	2	0	2	1
d__bacteria	p__chloroflexota	c__anaerolineae	o__promineofilales	f__promineofilaceae	g__promineofilum	s__Promineofilum breve	GCF_900066015.1	1	1	0	1	1
d__archaea	p__asgardarchaeota	c__lokiarchaeia	o__cr-4	f__mk-d1	g__prometheoarchaeum	s__Prometheoarchaeum syntrophicum	GCF_008000775.1	1	0	1	0	0
d__bacteria	p__proteobacteria	c__alphaproteobacteria	o__rhodobacterales	f__rhodobacteraceae	g__profundibacter	s__Profundibacter amoris	GCF_003544895.1	2	2	0	2	1
d__bacteria	p__proteobacteria	c__gammaproteobacteria	o__burkholderiales	f__burkholderiaceae_a	g__profftella	s__Profftella armatura	GCF_000441555.1	1	1	0	1	1
d__bacteria	p__cyanobacteria	c__cyanobacteriia	o__pcc-6307	f__cyanobiaceae	g__prochlorococcus_c	s__Prochlorococcus_C marinus_B	GCF_000011485.1	2	2	0	2	1
d__bacteria	p__cyanobacteria	c__cyanobacteriia	o__pcc-6307	f__cyanobiaceae	g__prochlorococcus_b	s__Prochlorococcus_B sp000757865	GCF_000757865.1	1	1	0	1	1
d__bacteria	p__cyanobacteria	c__cyanobacteriia	o__pcc-6307	f__cyanobiaceae	g__prochlorococcus_b	s__Prochlorococcus_B marinus_B	GCF_000012465.1	1	1	0	1	1
d__bacteria	p__cyanobacteria	c__cyanobacteriia	o__pcc-6307	f__cyanobiaceae	g__prochlorococcus_a	s__Prochlorococcus_A sp000757845	GCF_000757845.1	1	1	0	1	1
d__bacteria	p__cyanobacteria	c__cyanobacteriia	o__pcc-6307	f__cyanobiaceae	g__prochlorococcus_a	s__Prochlorococcus_A pastoris	GCF_000011465.1	1	1	0	1	1
d__bacteria	p__cyanobacteria	c__cyanobacteriia	o__pcc-6307	f__cyanobiaceae	g__prochlorococcus_a	s__Prochlorococcus_A marinus_P	GCF_000015665.1	1	1	0	1	1
d__bacteria	p__cyanobacteria	c__cyanobacteriia	o__pcc-6307	f__cyanobiaceae	g__prochlorococcus_a	s__Prochlorococcus_A marinus_O	GCF_000015645.1	1	1	0	1	1
d__bacteria	p__cyanobacteria	c__cyanobacteriia	o__pcc-6307	f__cyanobiaceae	g__prochlorococcus_a	s__Prochlorococcus_A marinus_L	GCF_000012645.1	1	1	0	1	1
d__bacteria	p__cyanobacteria	c__cyanobacteriia	o__pcc-6307	f__cyanobiaceae	g__prochlorococcus_a	s__Prochlorococcus_A marinus_E	GCF_000015965.1	1	1	0	1	1
d__bacteria	p__cyanobacteria	c__cyanobacteriia	o__pcc-6307	f__cyanobiaceae	g__prochlorococcus_a	s__Prochlorococcus_A marinus_A	GCF_000018065.1	1	1	0	1	1
d__bacteria	p__cyanobacteria	c__cyanobacteriia	o__pcc-6307	f__cyanobiaceae	g__prochlorococcus	s__Prochlorococcus marinus	GCF_000007925.1	1	1	0	1	1
d__bacteria	p__firmicutes	c__bacilli	o__bacillales	f__bacillaceae_h	g__priestia	s__Priestia megaterium_A	GCF_009497655.1	9	9	0	9	3
d__bacteria	p__firmicutes	c__bacilli	o__bacillales	f__bacillaceae_h	g__priestia	s__Priestia megaterium	GCF_000832985.1	13	13	0	13	3
d__bacteria	p__bacteroidota	c__bacteroidia	o__bacteroidales	f__bacteroidaceae	g__prevotella	s__Prevotella sp018127805	GCF_018127805.1	4	4	0	4	1
d__bacteria	p__bacteroidota	c__bacteroidia	o__bacteroidales	f__bacteroidaceae	g__prevotella	s__Prevotella sp017347605	GCF_017347605.1	5	5	0	5	1
d__bacteria	p__bacteroidota	c__bacteroidia	o__bacteroidales	f__bacteroidaceae	g__prevotella	s__Prevotella sp000467895	GCF_018128065.1	4	4	0	4	1
d__bacteria	p__bacteroidota	c__bacteroidia	o__bacteroidales	f__bacteroidaceae	g__prevotella	s__Prevotella sp000163055	GCF_000163055.2	4	4	0	4	1
d__bacteria	p__bacteroidota	c__bacteroidia	o__bacteroidales	f__bacteroidaceae	g__prevotella	s__Prevotella scopos	GCF_018127785.1	4	4	0	4	1
d__bacteria	p__bacteroidota	c__bacteroidia	o__bacteroidales	f__bacteroidaceae	g__prevotella	s__Prevotella ruminicola	GCF_000025925.1	4	4	0	4	2
d__bacteria	p__bacteroidota	c__bacteroidia	o__bacteroidales	f__bacteroidaceae	g__prevotella	s__Prevotella oris	GCF_900637655.1	5	5	0	5	1
d__bacteria	p__bacteroidota	c__bacteroidia	o__bacteroidales	f__bacteroidaceae	g__prevotella	s__Prevotella melaninogenica_C	GCF_018127925.1	3	3	0	3	1
d__bacteria	p__bacteroidota	c__bacteroidia	o__bacteroidales	f__bacteroidaceae	g__prevotella	s__Prevotella melaninogenica_B	GCF_018127965.1	4	4	0	4	1
d__bacteria	p__bacteroidota	c__bacteroidia	o__bacteroidales	f__bacteroidaceae	g__prevotella	s__Prevotella melaninogenica_A	GCF_003609775.1	4	4	0	4	1
d__bacteria	p__bacteroidota	c__bacteroidia	o__bacteroidales	f__bacteroidaceae	g__prevotella	s__Prevotella melaninogenica	GCF_000144405.1	4	4	0	4	1
d__bacteria	p__bacteroidota	c__bacteroidia	o__bacteroidales	f__bacteroidaceae	g__prevotella	s__Prevotella intermedia	GCF_001953955.1	4	4	0	4	2
d__bacteria	p__bacteroidota	c__bacteroidia	o__bacteroidales	f__bacteroidaceae	g__prevotella	s__Prevotella fusca	GCF_001262015.1	4	4	0	4	1
d__bacteria	p__firmicutes	c__bacilli	o__bacillales_b	f__dsm-1321	g__pradoshia	s__Pradoshia sp001685035	GCF_008935075.1	9	9	0	9	2
d__bacteria	p__firmicutes_a	c__clostridia	o__tissierellales	f__pp17-6a		s__PP17-6a sp900095615	GCF_004103715.1	4	4	0	4	2
d__bacteria	p__campylobacterota	c__campylobacteria	o__campylobacterales	f__arcobacteraceae	g__poseidonibacter	s__Poseidonibacter parvus	GCF_001956695.1	6	6	0	6	1
d__bacteria	p__campylobacterota	c__campylobacteria	o__campylobacterales	f__arcobacteraceae	g__poseidonibacter	s__Poseidonibacter lekithochrous	GCF_013283835.1	8	8	0	8	1
d__bacteria	p__proteobacteria	c__gammaproteobacteria	o__evansiales	f__evansiaceae	g__portiera	s__Portiera aleyrodidarum	GCF_000300075.1	1	1	0	1	1
d__bacteria	p__bacteroidota	c__bacteroidia	o__bacteroidales	f__porphyromonadaceae	g__porphyromonas_a	s__Porphyromonas_A cangingivalis	GCF_900638305.1	5	5	0	5	3
d__bacteria	p__bacteroidota	c__bacteroidia	o__bacteroidales	f__porphyromonadaceae	g__porphyromonas	s__Porphyromonas sp018127745	GCF_018127745.1	3	3	0	3	1
d__bacteria	p__bacteroidota	c__bacteroidia	o__bacteroidales	f__porphyromonadaceae	g__porphyromonas	s__Porphyromonas gingivalis	GCF_000010505.1	4	4	0	4	1
d__bacteria	p__bacteroidota	c__bacteroidia	o__bacteroidales	f__porphyromonadaceae	g__porphyromonas	s__Porphyromonas asaccharolytica	GCF_000212375.1	2	2	0	2	1
d__bacteria	p__planctomycetota	c__phycisphaerae	o__phycisphaerales	f__phycisphaeraceae	g__poriferisphaera	s__Poriferisphaera corsica	GCF_007747445.1	1	1	0	1	1
d__bacteria	p__actinobacteriota	c__actinomycetia	o__actinomycetales	f__microbacteriaceae	g__pontimonas	s__Pontimonas salivibrio	GCF_002950575.1	1	1	0	1	1
d__bacteria	p__bacteroidota	c__bacteroidia	o__cytophagales	f__hymenobacteraceae	g__pontibacter	s__Pontibacter russatus	GCF_009931655.1	3	3	0	3	1
d__bacteria	p__bacteroidota	c__bacteroidia	o__cytophagales	f__hymenobacteraceae	g__pontibacter	s__Pontibacter pudoricolor	GCF_010092985.1	4	4	0	4	1
d__bacteria	p__bacteroidota	c__bacteroidia	o__cytophagales	f__hymenobacteraceae	g__pontibacter	s__Pontibacter korlensis	GCF_000973725.1	4	4	0	4	1
d__bacteria	p__bacteroidota	c__bacteroidia	o__cytophagales	f__hymenobacteraceae	g__pontibacter	s__Pontibacter akesuensis	GCF_001611675.1	4	4	0	4	2
d__bacteria	p__bacteroidota	c__bacteroidia	o__cytophagales	f__hymenobacteraceae	g__pontibacter	s__Pontibacter actiniarum	GCF_003585765.1	5	5	0	5	2
d__bacteria	p__firmicutes	c__bacilli	o__bacillales_d	f__halobacillaceae	g__pontibacillus	s__Pontibacillus sp009858175	GCF_009858175.1	8	8	0	8	2
d__bacteria	p__planctomycetota	c__planctomycetia	o__planctomycetales	f__planctomycetaceae	g__polystyrenella	s__Polystyrenella longa	GCF_007750395.1	2	2	0	2	1
d__bacteria	p__proteobacteria	c__gammaproteobacteria	o__burkholderiales	f__burkholderiaceae	g__polynucleobacter	s__Polynucleobacter sp018688375	GCF_018688375.1	1	1	0	1	1
d__bacteria	p__proteobacteria	c__gammaproteobacteria	o__burkholderiales	f__burkholderiaceae	g__polynucleobacter	s__Polynucleobacter sp018688335	GCF_018688335.1	1	1	0	1	1
d__bacteria	p__proteobacteria	c__gammaproteobacteria	o__burkholderiales	f__burkholderiaceae	g__polynucleobacter	s__Polynucleobacter sp018688315	GCF_018688315.1	1	1	0	1	1
d__bacteria	p__proteobacteria	c__gammaproteobacteria	o__burkholderiales	f__burkholderiaceae	g__polynucleobacter	s__Polynucleobacter sp018688255	GCF_018688255.1	1	1	0	1	1
d__bacteria	p__proteobacteria	c__gammaproteobacteria	o__burkholderiales	f__burkholderiaceae	g__polynucleobacter	s__Polynucleobacter sp018688155	GCF_018688155.1	1	1	0	1	1
d__bacteria	p__proteobacteria	c__gammaproteobacteria	o__burkholderiales	f__burkholderiaceae	g__polynucleobacter	s__Polynucleobacter sp018687975	GCF_018687975.1	1	1	0	1	1
d__bacteria	p__proteobacteria	c__gammaproteobacteria	o__burkholderiales	f__burkholderiaceae	g__polynucleobacter	s__Polynucleobacter sp018687815	GCF_018687815.1	1	1	0	1	1
d__bacteria	p__proteobacteria	c__gammaproteobacteria	o__burkholderiales	f__burkholderiaceae	g__polynucleobacter	s__Polynucleobacter sp018687735	GCF_018687735.1	1	1	0	1	1
d__bacteria	p__proteobacteria	c__gammaproteobacteria	o__burkholderiales	f__burkholderiaceae	g__polynucleobacter	s__Polynucleobacter sp018687675	GCF_018687675.1	1	1	0	1	1
d__bacteria	p__proteobacteria	c__gammaproteobacteria	o__burkholderiales	f__burkholderiaceae	g__polynucleobacter	s__Polynucleobacter sp018687615	GCF_018687615.1	1	1	0	1	1
d__bacteria	p__proteobacteria	c__gammaproteobacteria	o__burkholderiales	f__burkholderiaceae	g__polynucleobacter	s__Polynucleobacter sp018687555	GCF_018687555.1	1	1	0	1	1
d__bacteria	p__proteobacteria	c__gammaproteobacteria	o__burkholderiales	f__burkholderiaceae	g__polynucleobacter	s__Polynucleobacter sp018687535	GCF_018687535.1	1	1	0	1	1
d__bacteria	p__proteobacteria	c__gammaproteobacteria	o__burkholderiales	f__burkholderiaceae	g__polynucleobacter	s__Polynucleobacter sp018687515	GCF_018687515.1	1	1	0	1	1
d__bacteria	p__proteobacteria	c__gammaproteobacteria	o__burkholderiales	f__burkholderiaceae	g__polynucleobacter	s__Polynucleobacter sp018687495	GCF_018687495.1	1	1	0	1	1
d__bacteria	p__proteobacteria	c__gammaproteobacteria	o__burkholderiales	f__burkholderiaceae	g__polynucleobacter	s__Polynucleobacter sp018687275	GCF_018687275.1	1	1	0	1	1
d__bacteria	p__proteobacteria	c__gammaproteobacteria	o__burkholderiales	f__burkholderiaceae	g__polynucleobacter	s__Polynucleobacter sp018687195	GCF_018687195.1	1	1	0	1	1
d__bacteria	p__proteobacteria	c__gammaproteobacteria	o__burkholderiales	f__burkholderiaceae	g__polynucleobacter	s__Polynucleobacter sp018687075	GCF_018687075.1	1	1	0	1	1
d__bacteria	p__proteobacteria	c__gammaproteobacteria	o__burkholderiales	f__burkholderiaceae	g__polynucleobacter	s__Polynucleobacter sp013307245	GCF_013307245.1	1	1	0	1	1
d__bacteria	p__proteobacteria	c__gammaproteobacteria	o__burkholderiales	f__burkholderiaceae	g__polynucleobacter	s__Polynucleobacter sp013307225	GCF_013307225.1	1	1	0	1	1
d__bacteria	p__proteobacteria	c__gammaproteobacteria	o__burkholderiales	f__burkholderiaceae	g__polynucleobacter	s__Polynucleobacter sp009928245	GCF_018687475.1	1	1	0	1	1
d__bacteria	p__proteobacteria	c__gammaproteobacteria	o__burkholderiales	f__burkholderiaceae	g__polynucleobacter	s__Polynucleobacter sp001870365	GCF_018687455.1	1	1	0	1	1
d__bacteria	p__proteobacteria	c__gammaproteobacteria	o__burkholderiales	f__burkholderiaceae	g__polynucleobacter	s__Polynucleobacter necessarius_K	GCF_900096755.1	1	1	0	1	1
d__bacteria	p__proteobacteria	c__gammaproteobacteria	o__burkholderiales	f__burkholderiaceae	g__polynucleobacter	s__Polynucleobacter necessarius_I	GCF_900095175.1	1	1	0	1	1
d__bacteria	p__proteobacteria	c__gammaproteobacteria	o__burkholderiales	f__burkholderiaceae	g__polynucleobacter	s__Polynucleobacter necessarius_H	GCF_900095215.1	1	1	0	1	1
d__bacteria	p__proteobacteria	c__gammaproteobacteria	o__burkholderiales	f__burkholderiaceae	g__polynucleobacter	s__Polynucleobacter necessarius_G	GCF_900095195.1	1	1	0	1	1
d__bacteria	p__proteobacteria	c__gammaproteobacteria	o__burkholderiales	f__burkholderiaceae	g__polynucleobacter	s__Polynucleobacter necessarius_F	GCF_900096765.1	1	1	0	1	1
d__bacteria	p__proteobacteria	c__gammaproteobacteria	o__burkholderiales	f__burkholderiaceae	g__polynucleobacter	s__Polynucleobacter necessarius_E	GCF_900095205.1	1	1	0	1	1
d__bacteria	p__proteobacteria	c__gammaproteobacteria	o__burkholderiales	f__burkholderiaceae	g__polynucleobacter	s__Polynucleobacter duraquae	GCF_000973625.1	1	1	0	1	1
d__bacteria	p__proteobacteria	c__gammaproteobacteria	o__burkholderiales	f__burkholderiaceae	g__polynucleobacter	s__Polynucleobacter difficilis	GCF_003065365.1	1	1	0	1	1
d__bacteria	p__proteobacteria	c__gammaproteobacteria	o__burkholderiales	f__burkholderiaceae	g__polynucleobacter	s__Polynucleobacter asymbioticus_C	GCF_018687575.1	1	1	0	1	1
d__bacteria	p__proteobacteria	c__gammaproteobacteria	o__burkholderiales	f__burkholderiaceae	g__polynucleobacter	s__Polynucleobacter asymbioticus_B	GCF_018687595.1	1	1	0	1	1
d__bacteria	p__proteobacteria	c__gammaproteobacteria	o__burkholderiales	f__burkholderiaceae	g__polynucleobacter	s__Polynucleobacter asymbioticus	GCF_000016345.1	1	1	0	1	1
d__bacteria	p__proteobacteria	c__alphaproteobacteria	o__rhizobiales	f__stappiaceae	g__polymorphum	s__Polymorphum gilvum	GCF_000192745.1	2	2	0	2	1
d__bacteria	p__actinobacteriota	c__actinomycetia	o__mycobacteriales	f__micromonosporaceae	g__polymorphospora	s__Polymorphospora rubra	GCF_018324255.1	3	3	0	3	1
d__bacteria	p__firmicutes	c__bacilli	o__thermoactinomycetales	f__jir-001	g__polycladomyces	s__Polycladomyces abyssicola	GCF_018326425.1	4	4	0	4	3
d__bacteria	p__proteobacteria	c__gammaproteobacteria	o__burkholderiales	f__burkholderiaceae	g__polyangium_a	s__Polyangium_A brachysporum	GCA_001017435.1	3	3	0	3	1
d__bacteria	p__proteobacteria	c__gammaproteobacteria	o__burkholderiales	f__burkholderiaceae	g__polaromonas	s__Polaromonas vacuolata	GCF_012584515.1	6	1	5	6	1
d__bacteria	p__proteobacteria	c__gammaproteobacteria	o__burkholderiales	f__burkholderiaceae	g__polaromonas	s__Polaromonas sp003711205	GCF_003711205.1	1	1	0	1	1
d__bacteria	p__proteobacteria	c__gammaproteobacteria	o__burkholderiales	f__burkholderiaceae	g__polaromonas	s__Polaromonas sp000013865	GCF_000013865.1	1	1	0	1	1
d__bacteria	p__proteobacteria	c__gammaproteobacteria	o__burkholderiales	f__burkholderiaceae	g__polaromonas	s__Polaromonas naphthalenivorans	GCF_000015505.1	2	2	0	2	1
d__bacteria	p__bacteroidota	c__bacteroidia	o__flavobacteriales	f__flavobacteriaceae	g__polaribacter	s__Polaribacter vadi	GCF_001761365.1	3	3	0	3	1
d__bacteria	p__bacteroidota	c__bacteroidia	o__flavobacteriales	f__flavobacteriaceae	g__polaribacter	s__Polaribacter sp017569185	GCF_017569185.1	2	2	0	2	1
d__bacteria	p__bacteroidota	c__bacteroidia	o__flavobacteriales	f__flavobacteriaceae	g__polaribacter	s__Polaribacter sp017498485	GCF_017498485.1	2	2	0	2	1
d__bacteria	p__bacteroidota	c__bacteroidia	o__flavobacteriales	f__flavobacteriaceae	g__polaribacter	s__Polaribacter sp016858305	GCF_016858305.2	5	5	0	5	1
d__bacteria	p__bacteroidota	c__bacteroidia	o__flavobacteriales	f__flavobacteriaceae	g__polaribacter	s__Polaribacter sp014352875	GCF_014352875.1	2	2	0	2	1
d__bacteria	p__bacteroidota	c__bacteroidia	o__flavobacteriales	f__flavobacteriaceae	g__polaribacter	s__Polaribacter sp011379025	GCA_019263805.1	6	6	0	6	1
d__bacteria	p__bacteroidota	c__bacteroidia	o__flavobacteriales	f__flavobacteriaceae	g__polaribacter	s__Polaribacter sp009796785	GCF_009796785.1	5	5	0	5	1
d__bacteria	p__bacteroidota	c__bacteroidia	o__flavobacteriales	f__flavobacteriaceae	g__polaribacter	s__Polaribacter sp002831685	GCF_002831685.1	6	6	0	6	1
d__bacteria	p__bacteroidota	c__bacteroidia	o__flavobacteriales	f__flavobacteriaceae	g__polaribacter	s__Polaribacter sp002005425	GCF_002005425.1	6	6	0	6	1
d__bacteria	p__bacteroidota	c__bacteroidia	o__flavobacteriales	f__flavobacteriaceae	g__polaribacter	s__Polaribacter sp000152945	GCF_000152945.2	2	2	0	2	1
d__bacteria	p__bacteroidota	c__bacteroidia	o__flavobacteriales	f__flavobacteriaceae	g__polaribacter	s__Polaribacter reichenbachii	GCF_001975665.1	3	3	0	3	1
d__bacteria	p__bacteroidota	c__bacteroidia	o__flavobacteriales	f__flavobacteriaceae	g__polaribacter	s__Polaribacter haliotis	GCF_014784055.1	2	2	0	2	1
d__bacteria	p__cyanobacteria	c__cyanobacteriia	o__cyanobacteriales	f__xenococcaceae	g__pleurocapsa	s__Pleurocapsa sp002368355	GCF_002368355.1	3	3	0	3	1
d__bacteria	p__proteobacteria	c__gammaproteobacteria	o__enterobacterales	f__enterobacteriaceae	g__plesiomonas	s__Plesiomonas shigelloides	GCF_900087055.1	11	11	0	11	3
d__bacteria	p__actinobacteriota	c__actinomycetia	o__actinomycetales	f__microbacteriaceae	g__plantibacter	s__Plantibacter cousiniae	GCF_003856975.1	2	2	0	2	1
d__bacteria	p__actinobacteriota	c__actinomycetia	o__mycobacteriales	f__micromonosporaceae	g__plantactinospora	s__Plantactinospora sp003030345	GCF_003030345.1	1	0	1	1	1
d__bacteria	p__firmicutes	c__bacilli	o__bacillales_a	f__planococcaceae	g__planococcus	s__Planococcus versutus	GCF_001186155.3	9	9	0	9	1
d__bacteria	p__firmicutes	c__bacilli	o__bacillales_a	f__planococcaceae	g__planococcus	s__Planococcus sp002833405	GCF_002833405.1	9	9	0	9	3
d__bacteria	p__firmicutes	c__bacilli	o__bacillales_a	f__planococcaceae	g__planococcus	s__Planococcus sp000785555	GCF_000785555.1	8	8	0	8	2
d__bacteria	p__firmicutes	c__bacilli	o__bacillales_a	f__planococcaceae	g__planococcus	s__Planococcus rifietoensis	GCF_001465795.2	9	9	0	9	3
d__bacteria	p__firmicutes	c__bacilli	o__bacillales_a	f__planococcaceae	g__planococcus	s__Planococcus plakortidis	GCF_001687605.2	9	9	0	9	3
d__bacteria	p__firmicutes	c__bacilli	o__bacillales_a	f__planococcaceae	g__planococcus	s__Planococcus maritimus	GCF_001687625.2	9	9	0	9	3
d__bacteria	p__firmicutes	c__bacilli	o__bacillales_a	f__planococcaceae	g__planococcus	s__Planococcus kocurii	GCF_001465835.2	9	9	0	9	2
d__bacteria	p__firmicutes	c__bacilli	o__bacillales_a	f__planococcaceae	g__planococcus	s__Planococcus halocryophilus	GCF_001687585.2	10	10	0	10	2
d__bacteria	p__firmicutes	c__bacilli	o__bacillales_a	f__planococcaceae	g__planococcus	s__Planococcus donghaensis	GCF_001687665.2	11	11	0	11	2
d__bacteria	p__firmicutes	c__bacilli	o__bacillales_a	f__planococcaceae	g__planococcus	s__Planococcus antarcticus	GCF_001687565.2	9	9	0	9	2
d__bacteria	p__bacteroidota	c__bacteroidia	o__flavobacteriales	f__weeksellaceae	g__planobacterium	s__Planobacterium taklimakanense	GCF_900187185.1	2	2	0	2	1
d__bacteria	p__bacteroidota	c__bacteroidia	o__flavobacteriales	f__weeksellaceae	g__planobacterium	s__Planobacterium sp014041915	GCF_014041915.1	3	3	0	3	1
d__bacteria	p__bacteroidota	c__bacteroidia	o__flavobacteriales	f__weeksellaceae	g__planobacterium	s__Planobacterium sp008831505	GCF_008831505.1	3	3	0	3	1
d__bacteria	p__actinobacteriota	c__actinomycetia	o__nanopelagicales	f__nanopelagicaceae	g__planktophila	s__Planktophila versatilis	GCF_002288105.1	1	1	0	1	1
d__bacteria	p__actinobacteriota	c__actinomycetia	o__nanopelagicales	f__nanopelagicaceae	g__planktophila	s__Planktophila vernalis	GCF_002288185.1	1	0	1	1	1
d__bacteria	p__actinobacteriota	c__actinomycetia	o__nanopelagicales	f__nanopelagicaceae	g__planktophila	s__Planktophila sulfonica	GCF_002288065.1	1	1	0	1	1
d__bacteria	p__actinobacteriota	c__actinomycetia	o__nanopelagicales	f__nanopelagicaceae	g__planktophila	s__Planktophila limnetica	GCF_002288365.1	1	0	1	1	1
d__bacteria	p__actinobacteriota	c__actinomycetia	o__nanopelagicales	f__nanopelagicaceae	g__planktophila	s__Planktophila lacus	GCF_002287925.1	1	1	0	1	1
d__bacteria	p__actinobacteriota	c__actinomycetia	o__nanopelagicales	f__nanopelagicaceae	g__planktophila	s__Planktophila dulcis	GCF_002288225.1	1	1	0	1	1
d__bacteria	p__proteobacteria	c__alphaproteobacteria	o__rhodobacterales	f__rhodobacteraceae	g__planktomarina	s__Planktomarina temperata	GCF_000738435.1	2	2	0	2	1
d__bacteria	p__planctomycetota	c__planctomycetia	o__planctomycetales	f__planctomycetaceae	g__planctopirus	s__Planctopirus limnophila	GCF_000092105.1	2	2	0	2	1
d__bacteria	p__planctomycetota	c__planctomycetia	o__planctomycetales	f__planctomycetaceae	g__planctopirus	s__Planctopirus ephydatiae	GCF_007752345.1	2	2	0	2	1
d__bacteria	p__planctomycetota	c__planctomycetia	o__planctomycetales	f__planctomycetaceae	g__planctomyces_a	s__Planctomyces_A sp001610835	GCF_001610835.1	2	2	0	2	1
d__bacteria	p__proteobacteria	c__gammaproteobacteria	o__pseudomonadales	f__halomonadaceae	g__pistricoccus	s__Pistricoccus aurantiacus	GCF_007954585.1	4	4	0	4	2
d__bacteria	p__planctomycetota	c__planctomycetia	o__pirellulales	f__lacipirellulaceae	g__pirellulimonas	s__Pirellulimonas nuda	GCF_007750855.1	1	0	1	1	1
d__bacteria	p__planctomycetota	c__planctomycetia	o__pirellulales	f__pirellulaceae	g__pirellula_b	s__Pirellula_B sp001610875	GCF_001610875.1	1	0	1	1	1
d__bacteria	p__planctomycetota	c__planctomycetia	o__pirellulales	f__pirellulaceae	g__pirellula	s__Pirellula staleyi	GCF_000025185.1	1	0	1	1	1
d__bacteria	p__proteobacteria	c__alphaproteobacteria	o__rhodobacterales	f__rhodobacteraceae	g__pikeienuella	s__Pikeienuella piscinae	GCF_011044155.1	1	1	0	1	1
d__bacteria	p__proteobacteria	c__gammaproteobacteria	o__burkholderiales	f__burkholderiaceae	g__pigmentiphaga	s__Pigmentiphaga sp003854895	GCF_003854895.1	2	2	0	2	1
d__bacteria	p__proteobacteria	c__gammaproteobacteria	o__burkholderiales	f__burkholderiaceae	g__pigmentiphaga	s__Pigmentiphaga aceris	GCF_008119665.1	3	3	0	3	1
d__bacteria	p__firmicutes	c__bacilli	o__acholeplasmatales	f__acholeplasmataceae	g__phytoplasma	s__Phytoplasma ziziphi	GCF_003640545.1	2	2	0	2	1
d__bacteria	p__firmicutes	c__bacilli	o__acholeplasmatales	f__acholeplasmataceae	g__phytoplasma	s__Phytoplasma sp000012225	GCF_000012225.1	2	2	0	2	1
d__bacteria	p__firmicutes	c__bacilli	o__acholeplasmatales	f__acholeplasmataceae	g__phytoplasma	s__Phytoplasma mali	GCF_000026205.1	2	2	0	2	1
d__bacteria	p__firmicutes	c__bacilli	o__acholeplasmatales	f__acholeplasmataceae	g__phytoplasma	s__Phytoplasma luffae	GCF_018024475.1	2	2	0	2	2
d__bacteria	p__actinobacteriota	c__actinomycetia	o__mycobacteriales	f__micromonosporaceae	g__phytohabitans	s__Phytohabitans suffuscus	GCF_011764565.1	2	2	0	2	1
d__bacteria	p__actinobacteriota	c__actinomycetia	o__mycobacteriales	f__micromonosporaceae	g__phytohabitans	s__Phytohabitans flavus	GCF_011764545.1	2	2	0	2	1
d__bacteria	p__proteobacteria	c__alphaproteobacteria	o__rhizobiales_a	f__rhizobiaceae_a	g__phyllobacterium	s__Phyllobacterium zundukense	GCF_002764115.1	3	3	0	3	1
d__bacteria	p__proteobacteria	c__alphaproteobacteria	o__rhizobiales_a	f__rhizobiaceae_a	g__phyllobacterium	s__Phyllobacterium sp014189505	GCF_014189505.1	3	3	0	3	1
d__bacteria	p__proteobacteria	c__alphaproteobacteria	o__rickettsiales	f__rickettsiaceae	g__phycorickettsia	s__Phycorickettsia trachydisci	GCF_003015145.1	1	1	0	1	1
d__bacteria	p__planctomycetota	c__phycisphaerae	o__phycisphaerales	f__phycisphaeraceae	g__phycisphaera	s__Phycisphaera mikurensis	GCF_000284115.1	1	1	0	1	1
d__bacteria	p__actinobacteriota	c__actinomycetia	o__actinomycetales	f__dermatophilaceae	g__phycicoccus	s__Phycicoccus sp011383005	GCF_011383005.1	1	1	0	1	1
d__bacteria	p__proteobacteria	c__alphaproteobacteria	o__rhizobiales	f__phreatobacteraceae	g__phreatobacter	s__Phreatobacter stygius	GCF_005144885.1	2	2	0	2	1
d__bacteria	p__proteobacteria	c__alphaproteobacteria	o__rhizobiales	f__phreatobacteraceae	g__phreatobacter	s__Phreatobacter cathodiphilus	GCF_003008515.1	2	2	0	2	1
d__bacteria	p__proteobacteria	c__gammaproteobacteria	o__enterobacterales	f__enterobacteriaceae	g__photorhabdus	s__Photorhabdus thracensis	GCF_001010285.1	7	7	0	7	1
d__bacteria	p__proteobacteria	c__gammaproteobacteria	o__enterobacterales	f__enterobacteriaceae	g__photorhabdus	s__Photorhabdus laumondii	GCF_003343245.1	7	7	0	7	1
d__bacteria	p__proteobacteria	c__gammaproteobacteria	o__enterobacterales	f__vibrionaceae	g__photobacterium	s__Photobacterium sp018199995	GCF_018199995.1	11	11	0	11	1
d__bacteria	p__proteobacteria	c__gammaproteobacteria	o__enterobacterales	f__vibrionaceae	g__photobacterium	s__Photobacterium profundum_A	GCF_000196255.1	15	15	0	15	3
d__bacteria	p__proteobacteria	c__gammaproteobacteria	o__enterobacterales	f__vibrionaceae	g__photobacterium	s__Photobacterium gaetbulicola	GCF_000940995.1	9	9	0	9	4
d__bacteria	p__actinobacteriota	c__coriobacteriia	o__coriobacteriales	f__eggerthellaceae	g__phoenicibacter	s__Phoenicibacter congonensis	GCF_900169485.1	2	2	0	2	1
d__bacteria	p__proteobacteria	c__gammaproteobacteria	o__enterobacterales	f__pasteurellaceae	g__phocoenobacter	s__Phocoenobacter skyensis	GCF_013377295.1	4	4	0	4	4
d__bacteria	p__proteobacteria	c__gammaproteobacteria	o__enterobacterales	f__pasteurellaceae	g__phocoenobacter	s__Phocoenobacter atlantica	GCF_018343795.1	5	5	0	5	5
d__bacteria	p__bacteroidota	c__bacteroidia	o__bacteroidales	f__bacteroidaceae	g__phocaeicola	s__Phocaeicola vulgatus	GCF_000012825.1	7	7	0	7	1
d__bacteria	p__bacteroidota	c__bacteroidia	o__bacteroidales	f__bacteroidaceae	g__phocaeicola	s__Phocaeicola salanitronis	GCF_000190575.1	6	6	0	6	2
d__bacteria	p__bacteroidota	c__bacteroidia	o__bacteroidales	f__bacteroidaceae	g__phocaeicola	s__Phocaeicola dorei	GCF_013009555.1	7	7	0	7	1
d__bacteria	p__bacteroidota	c__bacteroidia	o__chitinophagales	f__chitinophagaceae	g__phnomibacter	s__Phnomibacter ginsenosidimutans	GCF_009740285.1	2	2	0	2	1
d__bacteria	p__proteobacteria	c__alphaproteobacteria	o__caulobacterales	f__caulobacteraceae	g__phenylobacterium	s__Phenylobacterium zucineum	GCF_000017265.1	1	1	0	1	1
d__bacteria	p__proteobacteria	c__alphaproteobacteria	o__caulobacterales	f__caulobacteraceae	g__phenylobacterium	s__Phenylobacterium parvum	GCF_003150835.1	1	1	0	1	1
d__bacteria	p__proteobacteria	c__alphaproteobacteria	o__rhodospirillales	f__magnetospirillaceae	g__phaeospirillum	s__Phaeospirillum sp002105535	GCF_002105535.1	2	2	0	2	1
d__bacteria	p__proteobacteria	c__alphaproteobacteria	o__rhodospirillales	f__magnetospirillaceae	g__phaeospirillum	s__Phaeospirillum sp001511835	GCF_001511835.1	2	2	0	2	1
d__bacteria	p__proteobacteria	c__alphaproteobacteria	o__rhodospirillales	f__magnetospirillaceae	g__phaeospirillum	s__Phaeospirillum magneticum	GCF_000009985.1	2	2	0	2	1
d__bacteria	p__proteobacteria	c__alphaproteobacteria	o__rhodobacterales	f__rhodobacteraceae	g__phaeobacter	s__Phaeobacter porticola	GCF_001888185.1	4	4	0	4	1
d__bacteria	p__proteobacteria	c__alphaproteobacteria	o__rhodobacterales	f__rhodobacteraceae	g__phaeobacter	s__Phaeobacter piscinae	GCF_002407245.1	4	4	0	4	1
d__bacteria	p__proteobacteria	c__alphaproteobacteria	o__rhodobacterales	f__rhodobacteraceae	g__phaeobacter	s__Phaeobacter gallaeciensis	GCF_000511385.1	4	4	0	4	1
d__bacteria	p__thermotogota	c__thermotogae	o__petrotogales	f__petrotogaceae	g__petrotoga	s__Petrotoga mobilis	GCF_000018605.1	2	2	0	2	2
d__bacteria	p__firmicutes_a	c__clostridia	o__lachnospirales	f__vallitaleaceae	g__petrocella	s__Petrocella atlantisensis	GCF_900538275.1	5	5	0	5	1
d__bacteria	p__bacteroidota	c__bacteroidia	o__bacteroidales	f__dysgonomonadaceae	g__petrimonas	s__Petrimonas mucosa	GCF_900095795.1	2	2	0	2	1
d__bacteria	p__aquificota	c__aquificae	o__hydrogenothermales	f__hydrogenothermaceae	g__persephonella	s__Persephonella marina	GCF_000021565.1	2	2	0	2	1
d__bacteria	p__proteobacteria	c__gammaproteobacteria	o__enterobacterales	f__dsm-103792	g__permianibacter	s__Permianibacter aggregans	GCF_009756665.1	2	2	0	2	1
d__bacteria	p__firmicutes	c__bacilli	o__bacillales_b	f__dsm-1321	g__peribacillus	s__Peribacillus simplex_A	GCF_001578185.1	14	14	0	14	2
d__bacteria	p__firmicutes	c__bacilli	o__bacillales_b	f__dsm-1321	g__peribacillus	s__Peribacillus simplex	GCF_002243645.1	12	12	0	12	2
d__bacteria	p__firmicutes	c__bacilli	o__bacillales_b	f__dsm-1321	g__peribacillus	s__Peribacillus muralis_A	GCF_001645685.2	9	9	0	8	2
d__bacteria	p__firmicutes	c__bacilli	o__bacillales_b	f__dsm-1321	g__peribacillus	s__Peribacillus asahii_A	GCF_004006295.1	18	18	0	18	4
d__bacteria	p__firmicutes_a	c__clostridia	o__tissierellales	f__peptoniphilaceae	g__peptoniphilus_c	s__Peptoniphilus_C ivorii	GCF_900638585.1	3	3	0	3	1
d__bacteria	p__firmicutes_a	c__clostridia	o__peptostreptococcales	f__peptostreptococcaceae	g__peptoclostridium_a	s__Peptoclostridium_A acidaminophilum	GCF_000597865.1	7	7	0	7	7
d__bacteria	p__firmicutes_a	c__clostridia	o__peptostreptococcales	f__peptostreptococcaceae	g__peptacetobacter	s__Peptacetobacter hiranonis	GCF_008151785.1	10	10	0	10	4
d__bacteria	p__desulfobacterota	c__desulfuromonadia	o__geobacterales	f__pseudopelobacteraceae	g__pelotalea	s__Pelotalea sp012556225	GCF_016865365.1	2	2	0	2	1
d__bacteria	p__firmicutes_c	c__negativicutes	o__propionisporales	f__propionisporaceae	g__pelosinus	s__Pelosinus sp000725345	GCF_000725345.1	14	14	0	14	5
d__bacteria	p__firmicutes_c	c__negativicutes	o__propionisporales	f__propionisporaceae	g__pelosinus	s__Pelosinus fermentans_A	GCF_000271665.2	9	9	0	9	4
d__bacteria	p__chloroflexota	c__anaerolineae	o__anaerolineales	f__anaerolineaceae	g__pelolinea	s__Pelolinea submarina	GCF_003966975.1	1	1	0	1	1
d__bacteria	p__bacteroidota	c__bacteroidia	o__sphingobacteriales	f__sphingobacteriaceae	g__pelobium	s__Pelobium saltans	GCF_000190735.1	4	4	0	4	1
d__bacteria	p__proteobacteria	c__gammaproteobacteria	o__burkholderiales	f__burkholderiaceae	g__pelistega	s__Pelistega ratti	GCF_009833965.1	3	3	0	3	3
d__bacteria	p__firmicutes_a	c__clostridia	o__lachnospirales	f__lachnospiraceae	g__pelethocola	s__Pelethocola sp018866245	GCA_018866245.1	5	5	0	5	1
d__bacteria	p__firmicutes_a	c__clostridia	o__lachnospirales	f__lachnospiraceae	g__pelethocola	s__Pelethocola sp015159595	GCF_015159595.1	4	4	0	4	1
d__bacteria	p__proteobacteria	c__alphaproteobacteria	o__rhizobiales	f__devosiaceae	g__pelagibacterium	s__Pelagibacterium halotolerans	GCF_000230555.1	2	2	0	2	1
d__bacteria	p__proteobacteria	c__alphaproteobacteria	o__pelagibacterales	f__pelagibacteraceae	g__pelagibacter	s__Pelagibacter ubique	GCF_000012345.1	1	1	0	1	1
d__bacteria	p__proteobacteria	c__alphaproteobacteria	o__pelagibacterales	f__pelagibacteraceae	g__pelagibacter	s__Pelagibacter sp007833635	GCF_007833635.1	1	1	0	1	1
d__bacteria	p__proteobacteria	c__alphaproteobacteria	o__pelagibacterales	f__pelagibacteraceae	g__pelagibacter	s__Pelagibacter giovannonii	GCF_012276695.1	1	1	0	1	1
d__bacteria	p__proteobacteria	c__alphaproteobacteria	o__sphingomonadales	f__sphingomonadaceae	g__pelagerythrobacter	s__Pelagerythrobacter marensis	GCF_001028625.1	1	0	1	1	1
d__bacteria	p__actinobacteriota	c__actinomycetia	o__actinomycetales	f__dermatophilaceae	g__pedococcus	s__Pedococcus sp009707485	GCF_009707485.1	1	1	0	1	1
d__bacteria	p__bacteroidota	c__bacteroidia	o__sphingobacteriales	f__sphingobacteriaceae	g__pedobacter	s__Pedobacter steynii_A	GCF_001721645.1	4	4	0	4	1
d__bacteria	p__bacteroidota	c__bacteroidia	o__sphingobacteriales	f__sphingobacteriaceae	g__pedobacter	s__Pedobacter sp900564155	GCF_900564155.1	4	4	0	4	1
d__bacteria	p__bacteroidota	c__bacteroidia	o__sphingobacteriales	f__sphingobacteriaceae	g__pedobacter	s__Pedobacter sp015679185	GCF_015679185.1	3	3	0	3	1
d__bacteria	p__bacteroidota	c__bacteroidia	o__sphingobacteriales	f__sphingobacteriaceae	g__pedobacter	s__Pedobacter sp011759615	GCF_014692875.1	3	3	0	3	1
d__bacteria	p__bacteroidota	c__bacteroidia	o__sphingobacteriales	f__sphingobacteriaceae	g__pedobacter	s__Pedobacter sp005938645	GCF_005938645.2	4	4	0	4	1
d__bacteria	p__bacteroidota	c__bacteroidia	o__sphingobacteriales	f__sphingobacteriaceae	g__pedobacter	s__Pedobacter sp003852395	GCF_011303555.1	4	4	0	4	1
d__bacteria	p__bacteroidota	c__bacteroidia	o__sphingobacteriales	f__sphingobacteriaceae	g__pedobacter	s__Pedobacter sp001412655	GCF_001412655.1	7	0	7	7	1
d__bacteria	p__bacteroidota	c__bacteroidia	o__sphingobacteriales	f__sphingobacteriaceae	g__pedobacter	s__Pedobacter roseus	GCF_014395225.1	4	4	0	4	1
d__bacteria	p__bacteroidota	c__bacteroidia	o__sphingobacteriales	f__sphingobacteriaceae	g__pedobacter	s__Pedobacter heparinus	GCF_000023825.1	3	1	2	3	1
d__bacteria	p__bacteroidota	c__bacteroidia	o__sphingobacteriales	f__sphingobacteriaceae	g__pedobacter	s__Pedobacter ginsengisoli	GCF_002736205.1	5	4	1	5	1
d__bacteria	p__bacteroidota	c__bacteroidia	o__sphingobacteriales	f__sphingobacteriaceae	g__pedobacter	s__Pedobacter cryoconitis_A	GCF_001590605.1	6	2	4	6	1
d__bacteria	p__firmicutes	c__bacilli	o__lactobacillales	f__lactobacillaceae	g__pediococcus	s__Pediococcus inopinatus	GCF_002982135.1	4	4	0	4	4
d__bacteria	p__firmicutes	c__bacilli	o__lactobacillales	f__lactobacillaceae	g__pediococcus	s__Pediococcus claussenii	GCF_000237995.1	4	4	0	4	3
d__bacteria	p__proteobacteria	c__gammaproteobacteria	o__enterobacterales	f__enterobacteriaceae	g__pectobacterium	s__Pectobacterium wasabiae	GCF_001742185.1	7	7	0	7	2
d__bacteria	p__proteobacteria	c__gammaproteobacteria	o__enterobacterales	f__enterobacteriaceae	g__pectobacterium	s__Pectobacterium punjabense	GCF_012427845.1	7	7	0	7	2
d__bacteria	p__proteobacteria	c__gammaproteobacteria	o__enterobacterales	f__enterobacteriaceae	g__pectobacterium	s__Pectobacterium polaris	GCF_002307355.1	7	7	0	7	2
d__bacteria	p__proteobacteria	c__gammaproteobacteria	o__enterobacterales	f__enterobacteriaceae	g__pectobacterium	s__Pectobacterium parmentieri	GCF_001742145.1	7	7	0	7	2
d__bacteria	p__proteobacteria	c__gammaproteobacteria	o__enterobacterales	f__enterobacteriaceae	g__pectobacterium	s__Pectobacterium aroidearum	GCF_015689195.1	7	7	0	7	2
d__bacteria	p__cyanobacteria	c__cyanobacteriia	o__pseudanabaenales	f__pseudanabaenaceae	g__pcc-7502	s__PCC-7502 sp000317085	GCF_000317085.1	2	2	0	2	1
d__bacteria	p__cyanobacteria	c__cyanobacteriia	o__pcc-7407			s__PCC-7407 sp000317045	GCF_000317045.1	3	3	0	3	1
d__bacteria	p__cyanobacteria	c__cyanobacteriia	o__pseudanabaenales	f__pseudanabaenaceae	g__pcc-7367	s__PCC-7367 sp000317065	GCF_000317065.1	2	0	2	2	1
d__bacteria	p__cyanobacteria	c__cyanobacteriia	o__cyanobacteriales	f__coleofasciculaceae	g__pcc7113	s__PCC7113 sp000317515	GCF_000317515.1	4	4	0	4	2
d__bacteria	p__cyanobacteria	c__cyanobacteriia	o__thermosynechococcales	f__thermosynechococcaceae	g__pcc-6312	s__PCC-6312 sp000316685	GCF_000316685.1	1	1	0	1	1
d__bacteria	p__cyanobacteria	c__cyanobacteriia	o__cyanobacteriales	f__cyanobacteriaceae	g__pcc-10605	s__PCC-10605 sp000317675	GCF_000317675.1	3	3	0	3	1
d__bacteria	p__actinobacteriota	c__actinomycetia	o__actinomycetales	f__actinomycetaceae	g__pauljensenia	s__Pauljensenia sp018986735	GCF_018986735.1	3	3	0	3	1
d__bacteria	p__actinobacteriota	c__actinomycetia	o__actinomycetales	f__actinomycetaceae	g__pauljensenia	s__Pauljensenia sp011038875	GCF_011038885.2	3	3	0	3	1
d__bacteria	p__actinobacteriota	c__actinomycetia	o__actinomycetales	f__actinomycetaceae	g__pauljensenia	s__Pauljensenia odontolytica_C	GCF_005696695.1	3	3	0	3	1
d__bacteria	p__actinobacteriota	c__actinomycetia	o__actinomycetales	f__actinomycetaceae	g__pauljensenia	s__Pauljensenia odontolytica_A	GCF_009730335.1	3	3	0	3	1
d__bacteria	p__proteobacteria	c__gammaproteobacteria	o__burkholderiales	f__burkholderiaceae	g__paucimonas	s__Paucimonas sp004114795	GCF_004114795.1	3	3	0	3	1
d__bacteria	p__firmicutes	c__bacilli	o__lactobacillales	f__lactobacillaceae	g__paucilactobacillus	s__Paucilactobacillus hokkaidonensis	GCF_000829395.1	4	4	0	4	4
d__bacteria	p__proteobacteria	c__gammaproteobacteria	o__burkholderiales	f__burkholderiaceae	g__paucibacter_a	s__Paucibacter_A sp001477625	GCF_001477625.1	6	6	0	6	1
d__bacteria	p__proteobacteria	c__gammaproteobacteria	o__enterobacterales	f__pasteurellaceae	g__pasteurella	s__Pasteurella multocida_A	GCF_000973525.1	6	6	0	6	6
d__bacteria	p__proteobacteria	c__gammaproteobacteria	o__enterobacterales	f__pasteurellaceae	g__pasteurella	s__Pasteurella multocida	GCF_900187275.1	6	6	0	6	6
d__bacteria	p__proteobacteria	c__gammaproteobacteria	o__enterobacterales	f__pasteurellaceae	g__pasteurella	s__Pasteurella dagmatis	GCF_900186835.1	6	6	0	6	6
d__bacteria	p__proteobacteria	c__alphaproteobacteria	o__caulobacterales	f__parvularculaceae	g__parvularcula	s__Parvularcula bermudensis	GCF_000152825.2	1	1	0	1	1
d__bacteria	p__firmicutes_a	c__clostridia	o__tissierellales	f__peptoniphilaceae	g__parvimonas	s__Parvimonas micra	GCF_900637905.1	3	3	0	3	2
d__bacteria	p__proteobacteria	c__alphaproteobacteria	o__parvibaculales	f__parvibaculaceae	g__parvibaculum	s__Parvibaculum lavamentivorans	GCF_000017565.1	1	1	0	1	1
d__bacteria	p__actinobacteriota	c__coriobacteriia	o__coriobacteriales	f__atopobiaceae	g__parolsenella	s__Parolsenella catena	GCF_003966955.1	4	4	0	4	1
d__bacteria	p__proteobacteria	c__alphaproteobacteria	o__rhodobacterales	f__rhodobacteraceae	g__paroceanicella	s__Paroceanicella profunda	GCF_005887635.2	4	4	0	4	1
d__bacteria	p__proteobacteria	c__alphaproteobacteria	o__sphingomonadales	f__emcibacteraceae	g__paremcibacter	s__Paremcibacter congregatus	GCF_006385135.1	3	3	0	3	1
d__bacteria	p__proteobacteria	c__alphaproteobacteria	o__sphingomonadales	f__sphingomonadaceae	g__paraurantiacibacter	s__Paraurantiacibacter namhicola	GCF_001687545.1	1	0	1	1	1
d__bacteria	p__proteobacteria	c__alphaproteobacteria	o__sphingomonadales	f__sphingomonadaceae	g__parasphingorhabdus	s__Parasphingorhabdus sp017498565	GCF_017498565.1	1	1	0	1	1
d__bacteria	p__proteobacteria	c__alphaproteobacteria	o__sphingomonadales	f__sphingomonadaceae	g__parasphingorhabdus	s__Parasphingorhabdus sp012516475	GCF_012516475.1	1	1	0	1	1
d__bacteria	p__proteobacteria	c__alphaproteobacteria	o__sphingomonadales	f__sphingomonadaceae	g__parasphingorhabdus	s__Parasphingorhabdus sp002776575	GCF_002776575.1	2	2	0	2	1
d__bacteria	p__proteobacteria	c__alphaproteobacteria	o__sphingomonadales	f__sphingomonadaceae	g__parasphingorhabdus	s__Parasphingorhabdus sp002218195	GCF_002218195.1	2	2	0	2	1
d__bacteria	p__proteobacteria	c__alphaproteobacteria	o__sphingomonadales	f__sphingomonadaceae	g__parasphingorhabdus	s__Parasphingorhabdus sp001586275	GCF_001586275.1	2	2	0	2	1
d__bacteria	p__proteobacteria	c__alphaproteobacteria	o__sphingomonadales	f__sphingomonadaceae	g__parasphingopyxis	s__Parasphingopyxis sp013378055	GCF_013378055.1	1	1	0	1	1
d__bacteria	p__proteobacteria	c__alphaproteobacteria	o__sphingomonadales	f__sphingomonadaceae	g__parasphingopyxis	s__Parasphingopyxis algicola	GCF_013378075.1	1	1	0	1	1
d__bacteria	p__proteobacteria	c__gammaproteobacteria	o__enterobacterales	f__shewanellaceae	g__parashewanella	s__Parashewanella tropica	GCF_004358445.1	7	7	0	7	2
d__bacteria	p__proteobacteria	c__gammaproteobacteria	o__enterobacterales	f__shewanellaceae	g__parashewanella	s__Parashewanella spongiae	GCF_004358345.1	7	7	0	7	1
d__bacteria	p__proteobacteria	c__alphaproteobacteria	o__rhodobacterales	f__rhodobacteraceae	g__parasedimentitalea	s__Parasedimentitalea marina	GCF_004006175.1	5	0	5	5	5
d__bacteria	p__actinobacteriota	c__actinomycetia	o__actinomycetales	f__bifidobacteriaceae	g__parascardovia	s__Parascardovia denticolens	GCF_001042675.1	2	2	0	2	1
d__bacteria	p__proteobacteria	c__alphaproteobacteria	o__rhodospirillales	f__rhodospirillaceae	g__pararhodospirillum	s__Pararhodospirillum photometricum	GCF_000284415.1	1	1	0	1	1
d__bacteria	p__proteobacteria	c__gammaproteobacteria	o__enterobacterales	f__alteromonadaceae	g__pararheinheimera	s__Pararheinheimera sp003990335	GCF_003990335.1	6	6	0	6	2
d__bacteria	p__proteobacteria	c__gammaproteobacteria	o__enterobacterales	f__vibrionaceae	g__paraphotobacterium	s__Paraphotobacterium marinum	GCF_002216855.1	9	9	0	9	3
d__bacteria	p__firmicutes	c__bacilli	o__bacillales_d	f__amphibacillaceae	g__paraliobacillus_a	s__Paraliobacillus_A zengyii	GCF_003268595.1	9	9	0	9	2
d__bacteria	p__firmicutes_a	c__clostridia	o__lachnospirales	f__lachnospiraceae	g__paralachnospira	s__Paralachnospira sp014337195	GCA_014337195.1	4	4	0	4	3
d__bacteria	p__proteobacteria	c__gammaproteobacteria	o__enterobacterales	f__alteromonadaceae	g__paraglaciecola	s__Paraglaciecola sp009796765	GCF_009796765.1	5	5	0	5	1
d__bacteria	p__proteobacteria	c__gammaproteobacteria	o__enterobacterales	f__alteromonadaceae	g__paraglaciecola	s__Paraglaciecola sp009796745	GCF_009796745.1	5	5	0	5	1
d__bacteria	p__proteobacteria	c__gammaproteobacteria	o__enterobacterales	f__alteromonadaceae	g__paraglaciecola	s__Paraglaciecola psychrophila	GCF_000347635.1	6	6	0	6	1
d__bacteria	p__proteobacteria	c__gammaproteobacteria	o__enterobacterales	f__alteromonadaceae	g__paraglaciecola	s__Paraglaciecola mesophila_A	GCF_009906955.1	5	5	0	5	1
d__bacteria	p__firmicutes	c__bacilli	o__bacillales	f__anoxybacillaceae	g__parageobacillus	s__Parageobacillus toebii	GCF_003688615.2	10	8	2	10	7
d__bacteria	p__firmicutes	c__bacilli	o__bacillales	f__anoxybacillaceae	g__parageobacillus	s__Parageobacillus thermoglucosidasius	GCF_001295365.1	10	9	1	10	10
d__bacteria	p__bacteroidota	c__bacteroidia	o__chitinophagales	f__chitinophagaceae	g__paraflavitalea	s__Paraflavitalea soli	GCF_003555545.1	2	2	0	2	1
d__bacteria	p__proteobacteria	c__alphaproteobacteria	o__rhizobiales	f__devosiaceae	g__paradevosia	s__Paradevosia shaoguanensis	GCF_016801025.1	2	2	0	2	1
d__bacteria	p__proteobacteria	c__alphaproteobacteria	o__rhodobacterales	f__rhodobacteraceae	g__paracoccus	s__Paracoccus zhejiangensis	GCF_002847445.1	2	2	0	2	2
d__bacteria	p__proteobacteria	c__alphaproteobacteria	o__rhodobacterales	f__rhodobacteraceae	g__paracoccus	s__Paracoccus suum	GCF_003324675.1	2	2	0	2	1
d__bacteria	p__proteobacteria	c__alphaproteobacteria	o__rhodobacterales	f__rhodobacteraceae	g__paracoccus	s__Paracoccus sp014164625	GCF_016617715.1	2	2	0	2	1
d__bacteria	p__proteobacteria	c__alphaproteobacteria	o__rhodobacterales	f__rhodobacteraceae	g__paracoccus	s__Paracoccus sp002847305	GCF_002847305.1	2	2	0	2	1
d__bacteria	p__proteobacteria	c__alphaproteobacteria	o__rhodobacterales	f__rhodobacteraceae	g__paracoccus	s__Paracoccus sp002359815	GCF_016919705.1	3	3	0	3	1
d__bacteria	p__proteobacteria	c__alphaproteobacteria	o__rhodobacterales	f__rhodobacteraceae	g__paracoccus	s__Paracoccus pantotrophus	GCF_008824185.1	3	3	0	3	1
d__bacteria	p__proteobacteria	c__alphaproteobacteria	o__rhodobacterales	f__rhodobacteraceae	g__paracoccus	s__Paracoccus mutanolyticus	GCF_003285265.1	3	3	0	3	1
d__bacteria	p__proteobacteria	c__alphaproteobacteria	o__rhodobacterales	f__rhodobacteraceae	g__paracoccus	s__Paracoccus liaowanqingii	GCF_004683865.2	3	3	0	3	1
d__bacteria	p__proteobacteria	c__alphaproteobacteria	o__rhodobacterales	f__rhodobacteraceae	g__paracoccus	s__Paracoccus kondratievae	GCF_009301415.1	3	3	0	3	1
d__bacteria	p__proteobacteria	c__alphaproteobacteria	o__rhodobacterales	f__rhodobacteraceae	g__paracoccus	s__Paracoccus jeotgali	GCF_002865605.1	2	2	0	2	1
d__bacteria	p__proteobacteria	c__alphaproteobacteria	o__rhodobacterales	f__rhodobacteraceae	g__paracoccus	s__Paracoccus contaminans	GCF_002105555.1	2	2	0	2	1
d__bacteria	p__proteobacteria	c__alphaproteobacteria	o__rhodobacterales	f__rhodobacteraceae	g__paracoccus	s__Paracoccus aminovorans	GCF_900005615.1	3	3	0	3	1
d__bacteria	p__proteobacteria	c__alphaproteobacteria	o__rhodobacterales	f__rhodobacteraceae	g__paracoccus	s__Paracoccus aminophilus	GCF_000444995.1	4	4	0	4	1
d__bacteria	p__proteobacteria	c__alphaproteobacteria	o__paracaedibacterales	f__paracaedibacteraceae	g__paracaedibacter	s__Paracaedibacter acanthamoebae	GCF_000742835.1	2	2	0	2	1
d__bacteria	p__proteobacteria	c__gammaproteobacteria	o__burkholderiales	f__burkholderiaceae	g__paraburkholderia	s__Paraburkholderia xenovorans	GCF_000013645.1	6	6	0	6	6
d__bacteria	p__proteobacteria	c__gammaproteobacteria	o__burkholderiales	f__burkholderiaceae	g__paraburkholderia	s__Paraburkholderia terrae	GCF_002902925.1	6	6	0	6	6
d__bacteria	p__proteobacteria	c__gammaproteobacteria	o__burkholderiales	f__burkholderiaceae	g__paraburkholderia	s__Paraburkholderia sp013426915	GCF_013426915.1	7	7	0	7	7
d__bacteria	p__proteobacteria	c__gammaproteobacteria	o__burkholderiales	f__burkholderiaceae	g__paraburkholderia	s__Paraburkholderia sp013426895	GCF_013426895.1	6	6	0	6	6
d__bacteria	p__proteobacteria	c__gammaproteobacteria	o__burkholderiales	f__burkholderiaceae	g__paraburkholderia	s__Paraburkholderia sp001922345	GCF_001922345.1	4	4	0	4	1
d__bacteria	p__proteobacteria	c__gammaproteobacteria	o__burkholderiales	f__burkholderiaceae	g__paraburkholderia	s__Paraburkholderia sp001634365	GCF_001634365.1	7	7	0	7	7
d__bacteria	p__proteobacteria	c__gammaproteobacteria	o__burkholderiales	f__burkholderiaceae	g__paraburkholderia	s__Paraburkholderia sp000178415	GCF_902459535.1	6	6	0	6	6
d__bacteria	p__proteobacteria	c__gammaproteobacteria	o__burkholderiales	f__burkholderiaceae	g__paraburkholderia	s__Paraburkholderia phytofirmans	GCF_000020125.1	6	6	0	6	6
d__bacteria	p__proteobacteria	c__gammaproteobacteria	o__burkholderiales	f__burkholderiaceae	g__paraburkholderia	s__Paraburkholderia phymatum	GCF_000020045.1	6	6	0	6	6
d__bacteria	p__proteobacteria	c__gammaproteobacteria	o__burkholderiales	f__burkholderiaceae	g__paraburkholderia	s__Paraburkholderia megapolitana	GCF_007556815.1	4	4	0	4	4
d__bacteria	p__proteobacteria	c__gammaproteobacteria	o__burkholderiales	f__burkholderiaceae	g__paraburkholderia	s__Paraburkholderia hospita	GCF_002902965.1	7	7	0	7	7
d__bacteria	p__proteobacteria	c__gammaproteobacteria	o__burkholderiales	f__burkholderiaceae	g__paraburkholderia	s__Paraburkholderia caribensis	GCF_002902945.1	6	6	0	6	6
d__bacteria	p__proteobacteria	c__gammaproteobacteria	o__burkholderiales	f__burkholderiaceae	g__paraburkholderia	s__Paraburkholderia caffeinilytica	GCF_003368325.1	6	6	0	6	6
d__bacteria	p__proteobacteria	c__gammaproteobacteria	o__burkholderiales	f__burkholderiaceae	g__paraburkholderia	s__Paraburkholderia aromaticivorans_A	GCF_012689525.1	7	7	0	7	7
d__bacteria	p__proteobacteria	c__gammaproteobacteria	o__burkholderiales	f__burkholderiaceae	g__paraburkholderia	s__Paraburkholderia aromaticivorans	GCF_002278075.1	6	6	0	6	6
d__bacteria	p__proteobacteria	c__gammaproteobacteria	o__burkholderiales	f__burkholderiaceae	g__paraburkholderia	s__Paraburkholderia acidisoli	GCF_009789675.1	6	6	0	6	1
d__bacteria	p__proteobacteria	c__gammaproteobacteria	o__burkholderiales	f__burkholderiaceae	g__paraburkholderia	s__Paraburkholderia acidiphila	GCF_009789655.1	7	7	0	7	7
d__bacteria	p__bacteroidota	c__bacteroidia	o__bacteroidales	f__tannerellaceae	g__parabacteroides	s__Parabacteroides distasonis	GCF_000012845.1	7	7	0	7	1
d__bacteria	p__proteobacteria	c__gammaproteobacteria	o__enterobacterales	f__enterobacteriaceae	g__pantoea_a	s__Pantoea_A carbekii	GCF_000971765.1	3	3	0	3	2
d__bacteria	p__proteobacteria	c__gammaproteobacteria	o__enterobacterales	f__enterobacteriaceae	g__pantoea	s__Pantoea vagans_C	GCF_001506165.1	7	7	0	7	3
d__bacteria	p__proteobacteria	c__gammaproteobacteria	o__enterobacterales	f__enterobacteriaceae	g__pantoea	s__Pantoea vagans	GCF_004792415.1	7	7	0	7	1
d__bacteria	p__proteobacteria	c__gammaproteobacteria	o__enterobacterales	f__enterobacteriaceae	g__pantoea	s__Pantoea sp000175935	GCF_000175935.2	7	7	0	7	3
d__bacteria	p__proteobacteria	c__gammaproteobacteria	o__enterobacterales	f__enterobacteriaceae	g__pantoea	s__Pantoea rwandensis_B	GCF_000759475.1	7	7	0	7	5
d__bacteria	p__proteobacteria	c__gammaproteobacteria	o__enterobacterales	f__enterobacteriaceae	g__pantoea	s__Pantoea eucalypti	GCF_009646115.1	7	7	0	7	3
d__bacteria	p__proteobacteria	c__gammaproteobacteria	o__enterobacterales	f__enterobacteriaceae	g__pantoea	s__Pantoea dispersa_B	GCF_007833795.1	7	7	0	7	2
d__bacteria	p__proteobacteria	c__gammaproteobacteria	o__burkholderiales	f__burkholderiaceae	g__pandoraea	s__Pandoraea vervacti	GCF_000934605.2	4	4	0	4	1
d__bacteria	p__proteobacteria	c__gammaproteobacteria	o__burkholderiales	f__burkholderiaceae	g__pandoraea	s__Pandoraea thiooxydans	GCF_001931675.1	1	0	1	1	1
d__bacteria	p__proteobacteria	c__gammaproteobacteria	o__burkholderiales	f__burkholderiaceae	g__pandoraea	s__Pandoraea sputorum	GCF_000814845.2	4	4	0	4	1
d__bacteria	p__proteobacteria	c__gammaproteobacteria	o__burkholderiales	f__burkholderiaceae	g__pandoraea	s__Pandoraea pulmonicola	GCF_000815105.2	4	4	0	4	1
d__bacteria	p__proteobacteria	c__gammaproteobacteria	o__burkholderiales	f__burkholderiaceae	g__pandoraea	s__Pandoraea pnomenusa	GCF_000767615.3	4	4	0	4	1
d__bacteria	p__proteobacteria	c__gammaproteobacteria	o__burkholderiales	f__burkholderiaceae	g__pandoraea	s__Pandoraea oxalativorans	GCF_000972785.3	4	4	0	4	1
d__bacteria	p__proteobacteria	c__gammaproteobacteria	o__burkholderiales	f__burkholderiaceae	g__pandoraea	s__Pandoraea norimbergensis	GCF_001465545.3	4	4	0	4	1
d__bacteria	p__proteobacteria	c__gammaproteobacteria	o__burkholderiales	f__burkholderiaceae	g__pandoraea	s__Pandoraea fibrosis	GCF_000807775.2	4	4	0	4	1
d__bacteria	p__proteobacteria	c__gammaproteobacteria	o__burkholderiales	f__burkholderiaceae	g__pandoraea	s__Pandoraea faecigallinarum	GCF_001029105.3	4	4	0	4	1
d__bacteria	p__proteobacteria	c__gammaproteobacteria	o__burkholderiales	f__burkholderiaceae	g__pandoraea	s__Pandoraea apista	GCF_001465595.2	4	4	0	4	1
d__bacteria	p__bacteroidota	c__bacteroidia	o__chitinophagales	f__chitinophagaceae	g__panacibacter	s__Panacibacter ginsenosidivorans	GCF_007971225.1	1	0	1	1	1
d__bacteria	p__planctomycetota	c__phycisphaerae	o__phycisphaerales	f__phycisphaeraceae	g__pan265	s__Pan265 sp007748075	GCA_007748075.1	1	0	1	1	1
d__bacteria	p__planctomycetota	c__planctomycetia	o__isosphaerales	f__isosphaeraceae	g__paludisphaera	s__Paludisphaera sp001610895	GCF_001610895.1	4	4	0	4	1
d__bacteria	p__planctomycetota	c__planctomycetia	o__isosphaerales	f__isosphaeraceae	g__paludisphaera	s__Paludisphaera borealis	GCF_001956985.1	3	3	0	3	1
d__bacteria	p__acidobacteriota	c__acidobacteriae	o__bryobacterales	f__bryobacteraceae	g__paludibaculum	s__Paludibaculum fermentans	GCF_015277775.1	2	2	0	2	1
d__bacteria	p__proteobacteria	c__gammaproteobacteria	o__burkholderiales	f__chromobacteriaceae	g__paludibacterium	s__Paludibacterium sp018802765	GCF_018802765.1	7	7	0	7	2
d__bacteria	p__proteobacteria	c__gammaproteobacteria	o__burkholderiales	f__chromobacteriaceae	g__paludibacterium	s__Paludibacterium paludis	GCF_018802605.1	8	8	0	8	1
d__bacteria	p__bacteroidota	c__bacteroidia	o__bacteroidales	f__paludibacteraceae	g__paludibacter	s__Paludibacter propionicigenes	GCF_000183135.1	3	3	0	3	1
d__bacteria	p__proteobacteria	c__alphaproteobacteria	o__rhodobacterales	f__rhodobacteraceae	g__palleronia	s__Palleronia sp900609015	GCF_009363795.1	2	2	0	2	1
d__archaea	p__methanobacteriota_b	c__thermococci	o__thermococcales	f__thermococcaceae	g__palaeococcus	s__Palaeococcus pacificus	GCF_000725425.1	2	2	0	2	1
d__bacteria	p__firmicutes	c__bacilli	o__bacillales_a	f__planococcaceae	g__paenisporosarcina	s__Paenisporosarcina antarctica	GCF_004367585.1	9	9	0	9	2
d__bacteria	p__firmicutes	c__bacilli	o__paenibacillales	f__paenibacillaceae	g__paenibacillus_z	s__Paenibacillus_Z rhizovicinus	GCF_010365285.1	13	13	0	13	4
d__bacteria	p__firmicutes	c__bacilli	o__paenibacillales	f__paenibacillaceae	g__paenibacillus_z	s__Paenibacillus_Z lycopersici	GCF_010119935.1	11	11	0	11	3
d__bacteria	p__firmicutes	c__bacilli	o__paenibacillales	f__paenibacillaceae	g__paenibacillus_z	s__Paenibacillus_Z baekrokdamisoli	GCF_003945345.1	9	9	0	9	5
d__bacteria	p__firmicutes	c__bacilli	o__paenibacillales	f__paenibacillaceae	g__paenibacillus_z	s__Paenibacillus_Z albus	GCF_003952225.1	13	13	0	13	7
d__bacteria	p__firmicutes	c__bacilli	o__paenibacillales	f__paenibacillaceae	g__paenibacillus_o	s__Paenibacillus_O sp012676905	GCF_012676905.1	8	8	0	8	4
d__bacteria	p__firmicutes	c__bacilli	o__paenibacillales	f__paenibacillaceae	g__paenibacillus_o	s__Paenibacillus_O sp002243345	GCF_002243345.2	8	8	0	8	4
d__bacteria	p__firmicutes	c__bacilli	o__paenibacillales	f__paenibacillaceae	g__paenibacillus_o	s__Paenibacillus_O beijingensis	GCF_000961095.1	9	9	0	9	4
d__bacteria	p__firmicutes	c__bacilli	o__paenibacillales	f__dy6	g__paenibacillus_n	s__Paenibacillus_N swuensis	GCF_001644605.1	9	9	0	9	1
d__bacteria	p__firmicutes	c__bacilli	o__paenibacillales	f__paenibacillaceae	g__paenibacillus_k	s__Paenibacillus_K guangzhouensis	GCF_009363075.1	9	9	0	9	4
d__bacteria	p__firmicutes	c__bacilli	o__paenibacillales	f__paenibacillaceae	g__paenibacillus_j	s__Paenibacillus_J bovis	GCF_001421015.2	9	9	0	9	4
d__bacteria	p__firmicutes	c__bacilli	o__paenibacillales	f__nbrc-103111	g__paenibacillus_h	s__Paenibacillus_H larvae	GCF_002003265.1	8	8	0	8	3
d__bacteria	p__firmicutes	c__bacilli	o__paenibacillales	f__nbrc-103111	g__paenibacillus_g	s__Paenibacillus_G mucilaginosus	GCF_000250655.1	14	13	1	14	5
d__bacteria	p__firmicutes	c__bacilli	o__paenibacillales	f__paenibacillaceae	g__paenibacillus_c	s__Paenibacillus_C sp002741035	GCF_002741035.1	8	8	0	8	2
d__bacteria	p__firmicutes	c__bacilli	o__paenibacillales	f__paenibacillaceae	g__paenibacillus_c	s__Paenibacillus_C protaetiae	GCF_004135365.1	9	9	0	9	4
d__bacteria	p__firmicutes	c__bacilli	o__paenibacillales	f__nbrc-103111	g__paenibacillus_ac	s__Paenibacillus_AC psychroresistens	GCF_009728935.1	8	8	0	8	8
d__bacteria	p__firmicutes	c__bacilli	o__paenibacillales	f__paenibacillaceae	g__paenibacillus_a	s__Paenibacillus_A yonginensis	GCF_001685395.1	10	10	0	10	9
d__bacteria	p__firmicutes	c__bacilli	o__paenibacillales	f__paenibacillaceae	g__paenibacillus_a	s__Paenibacillus_A sp003060825	GCF_003060825.1	13	13	0	13	5
d__bacteria	p__firmicutes	c__bacilli	o__paenibacillales	f__paenibacillaceae	g__paenibacillus_a	s__Paenibacillus_A lutimineralis	GCF_003991425.1	10	10	0	10	5
d__bacteria	p__firmicutes	c__bacilli	o__paenibacillales	f__paenibacillaceae	g__paenibacillus_a	s__Paenibacillus_A lentus	GCF_003931855.1	8	8	0	8	4
d__bacteria	p__firmicutes	c__bacilli	o__paenibacillales	f__paenibacillaceae	g__paenibacillus	s__Paenibacillus xylanexedens_A	GCF_001908275.1	12	12	0	12	3
d__bacteria	p__firmicutes	c__bacilli	o__paenibacillales	f__paenibacillaceae	g__paenibacillus	s__Paenibacillus terrae_B	GCF_000235585.1	9	7	2	9	7
d__bacteria	p__firmicutes	c__bacilli	o__paenibacillales	f__paenibacillaceae	g__paenibacillus	s__Paenibacillus stellifer	GCF_000758685.1	11	11	0	11	7
d__bacteria	p__firmicutes	c__bacilli	o__paenibacillales	f__paenibacillaceae	g__paenibacillus	s__Paenibacillus sp017086365	GCF_017086365.1	10	10	0	10	4
d__bacteria	p__firmicutes	c__bacilli	o__paenibacillales	f__paenibacillaceae	g__paenibacillus	s__Paenibacillus sp014844075	GCF_014844075.1	11	11	0	11	5
d__bacteria	p__firmicutes	c__bacilli	o__paenibacillales	f__paenibacillaceae	g__paenibacillus	s__Paenibacillus sp005577435	GCF_005577435.1	9	9	0	9	3
d__bacteria	p__firmicutes	c__bacilli	o__paenibacillales	f__paenibacillaceae	g__paenibacillus	s__Paenibacillus sp003268635	GCF_003268635.1	11	11	0	11	5
d__bacteria	p__firmicutes	c__bacilli	o__paenibacillales	f__paenibacillaceae	g__paenibacillus	s__Paenibacillus sp001860525	GCF_015326965.1	8	8	0	8	6
d__bacteria	p__firmicutes	c__bacilli	o__paenibacillales	f__paenibacillaceae	g__paenibacillus	s__Paenibacillus sp000949425	GCF_000949425.1	12	12	0	12	4
d__bacteria	p__firmicutes	c__bacilli	o__paenibacillales	f__paenibacillaceae	g__paenibacillus	s__Paenibacillus sp000758625	GCF_000758625.1	10	10	0	10	6
d__bacteria	p__firmicutes	c__bacilli	o__paenibacillales	f__paenibacillaceae	g__paenibacillus	s__Paenibacillus sp000758605	GCF_000758605.1	10	10	0	10	6
d__bacteria	p__firmicutes	c__bacilli	o__paenibacillales	f__paenibacillaceae	g__paenibacillus	s__Paenibacillus sp000758585	GCF_000758585.1	10	10	0	10	6
d__bacteria	p__firmicutes	c__bacilli	o__paenibacillales	f__paenibacillaceae	g__paenibacillus	s__Paenibacillus sp000758545	GCF_000758545.1	10	10	0	10	6
d__bacteria	p__firmicutes	c__bacilli	o__paenibacillales	f__paenibacillaceae	g__paenibacillus	s__Paenibacillus sp000758525	GCF_000758525.1	9	9	0	9	4
d__bacteria	p__firmicutes	c__bacilli	o__paenibacillales	f__paenibacillaceae	g__paenibacillus	s__Paenibacillus sophorae	GCF_018966525.1	9	9	0	9	5
d__bacteria	p__firmicutes	c__bacilli	o__paenibacillales	f__paenibacillaceae	g__paenibacillus	s__Paenibacillus sonchi	GCF_016772475.1	9	9	0	9	4
d__bacteria	p__firmicutes	c__bacilli	o__paenibacillales	f__paenibacillaceae	g__paenibacillus	s__Paenibacillus sabinae	GCF_000612505.1	9	9	0	9	4
d__bacteria	p__firmicutes	c__bacilli	o__paenibacillales	f__paenibacillaceae	g__paenibacillus	s__Paenibacillus riograndensis	GCF_000981585.1	9	9	0	9	5
d__bacteria	p__firmicutes	c__bacilli	o__paenibacillales	f__paenibacillaceae	g__paenibacillus	s__Paenibacillus polymyxa_C	GCF_000237325.1	14	14	0	14	8
d__bacteria	p__firmicutes	c__bacilli	o__paenibacillales	f__paenibacillaceae	g__paenibacillus	s__Paenibacillus polymyxa_B	GCF_001719045.1	14	14	0	14	7
d__bacteria	p__firmicutes	c__bacilli	o__paenibacillales	f__paenibacillaceae	g__paenibacillus	s__Paenibacillus polymyxa	GCF_015710975.1	14	14	0	14	8
d__bacteria	p__firmicutes	c__bacilli	o__paenibacillales	f__paenibacillaceae	g__paenibacillus	s__Paenibacillus odorifer	GCF_000758725.1	10	10	0	10	4
d__bacteria	p__firmicutes	c__bacilli	o__paenibacillales	f__paenibacillaceae	g__paenibacillus	s__Paenibacillus lautus_A	GCF_014863545.1	8	8	0	8	4
d__bacteria	p__firmicutes	c__bacilli	o__paenibacillales	f__paenibacillaceae	g__paenibacillus	s__Paenibacillus kribbensis	GCF_002240415.1	10	10	0	10	6
d__bacteria	p__firmicutes	c__bacilli	o__paenibacillales	f__paenibacillaceae	g__paenibacillus	s__Paenibacillus ihbetae	GCF_002741055.1	9	9	0	9	5
d__bacteria	p__firmicutes	c__bacilli	o__paenibacillales	f__paenibacillaceae	g__paenibacillus	s__Paenibacillus graminis	GCF_000758705.1	10	10	0	10	4
d__bacteria	p__firmicutes	c__bacilli	o__paenibacillales	f__paenibacillaceae	g__paenibacillus	s__Paenibacillus durus_B	GCF_000993825.1	9	9	0	9	6
d__bacteria	p__firmicutes	c__bacilli	o__paenibacillales	f__paenibacillaceae	g__paenibacillus	s__Paenibacillus durus	GCF_000756615.1	9	9	0	9	6
d__bacteria	p__firmicutes	c__bacilli	o__paenibacillales	f__paenibacillaceae	g__paenibacillus	s__Paenibacillus donghaensis	GCF_002192415.1	9	9	0	9	5
d__bacteria	p__firmicutes	c__bacilli	o__paenibacillales	f__paenibacillaceae	g__paenibacillus	s__Paenibacillus crassostreae	GCF_001857945.1	10	10	0	10	3
d__bacteria	p__firmicutes	c__bacilli	o__paenibacillales	f__paenibacillaceae	g__paenibacillus	s__Paenibacillus cellulositrophicus_A	GCF_009363095.1	9	9	0	9	9
d__bacteria	p__firmicutes	c__bacilli	o__paenibacillales	f__paenibacillaceae	g__paenibacillus	s__Paenibacillus brasilensis	GCF_009363115.1	11	11	0	11	7
d__bacteria	p__firmicutes	c__bacilli	o__paenibacillales	f__paenibacillaceae	g__paenibacillus	s__Paenibacillus borealis	GCF_000758665.1	10	10	0	10	5
d__bacteria	p__firmicutes	c__bacilli	o__paenibacillales	f__paenibacillaceae	g__paenibacillus	s__Paenibacillus amylolyticus_B	GCF_008386395.1	13	13	0	13	4
d__bacteria	p__actinobacteriota	c__actinomycetia	o__actinomycetales	f__micrococcaceae	g__paenarthrobacter	s__Paenarthrobacter sp017357425	GCF_017357425.1	6	6	0	6	1
d__bacteria	p__actinobacteriota	c__actinomycetia	o__actinomycetales	f__micrococcaceae	g__paenarthrobacter	s__Paenarthrobacter sp002224285	GCF_002224285.1	6	6	0	6	1
d__bacteria	p__actinobacteriota	c__actinomycetia	o__actinomycetales	f__micrococcaceae	g__paenarthrobacter	s__Paenarthrobacter aurescens_A	GCF_000014925.1	6	3	3	6	6
d__bacteria	p__proteobacteria	c__alphaproteobacteria	o__rhodobacterales	f__rhodobacteraceae	g__pacificitalea	s__Pacificitalea manganoxidans	GCF_002504165.1	2	2	0	2	1
d__bacteria	p__cyanobacteria	c__cyanobacteriia	o__cyanobacteriales	f__oscillatoriaceae	g__oxynema	s__Oxynema aestuarii	GCF_012295525.1	5	5	0	5	1
d__bacteria	p__proteobacteria	c__gammaproteobacteria	o__burkholderiales	f__burkholderiaceae	g__oxalobacter	s__Oxalobacter formigenes	GCF_002127965.1	1	1	0	1	1
d__bacteria	p__bacteroidota	c__bacteroidia	o__flavobacteriales	f__schleiferiaceae	g__owenweeksia	s__Owenweeksia hongkongensis	GCF_000236705.1	2	2	0	2	1
d__bacteria	p__proteobacteria	c__gammaproteobacteria	o__burkholderiales	f__burkholderiaceae	g__ottowia	s__Ottowia sp017498525	GCF_017498525.1	1	1	0	1	1
d__bacteria	p__proteobacteria	c__gammaproteobacteria	o__burkholderiales	f__burkholderiaceae	g__ottowia	s__Ottowia sp001262075	GCF_001262075.1	3	3	0	3	1
d__bacteria	p__proteobacteria	c__gammaproteobacteria	o__burkholderiales	f__burkholderiaceae	g__ottowia	s__Ottowia oryzae	GCF_003008535.1	2	2	0	2	1
d__bacteria	p__proteobacteria	c__gammaproteobacteria	o__enterobacterales	f__pasteurellaceae	g__otariodibacter	s__Otariodibacter oris	GCF_009684715.1	6	6	0	6	6
d__bacteria	p__cyanobacteria	c__cyanobacteriia	o__cyanobacteriales	f__oscillatoriaceae	g__oscillatoria	s__Oscillatoria acuminata	GCF_000317105.1	3	3	0	3	1
d__bacteria	p__desulfobacterota	c__desulfuromonadia	o__geobacterales	f__pseudopelobacteraceae	g__oryzomonas	s__Oryzomonas sp008330225	GCF_008330225.1	2	2	0	2	1
d__bacteria	p__proteobacteria	c__gammaproteobacteria	o__burkholderiales	f__rhodocyclaceae	g__oryzomicrobium	s__Oryzomicrobium terrae	GCF_008274805.1	3	3	0	3	1
d__bacteria	p__proteobacteria	c__gammaproteobacteria	o__burkholderiales	f__burkholderiaceae	g__orrella	s__Orrella dioscoreae	GCF_900089455.2	2	2	0	2	1
d__bacteria	p__proteobacteria	c__alphaproteobacteria	o__rhizobiales	f__xanthobacteraceae	g__ornl1	s__ORNL1 sp012971745	GCF_012971745.1	2	2	0	2	1
d__bacteria	p__bacteroidota	c__bacteroidia	o__flavobacteriales	f__weeksellaceae	g__ornithobacterium	s__Ornithobacterium rhinotracheale_A	GCF_004088395.1	3	3	0	3	1
d__bacteria	p__bacteroidota	c__bacteroidia	o__flavobacteriales	f__weeksellaceae	g__ornithobacterium	s__Ornithobacterium rhinotracheale	GCF_000265465.1	3	3	0	3	1
d__bacteria	p__actinobacteriota	c__actinomycetia	o__actinomycetales	f__dermatophilaceae	g__ornithinimicrobium	s__Ornithinimicrobium sp003351765	GCF_003351765.1	2	2	0	2	1
d__bacteria	p__actinobacteriota	c__actinomycetia	o__actinomycetales	f__dermatophilaceae	g__ornithinicoccus	s__Ornithinicoccus sp007197575	GCF_007197575.1	2	2	0	2	1
d__bacteria	p__proteobacteria	c__alphaproteobacteria	o__rickettsiales	f__rickettsiaceae	g__orientia	s__Orientia tsutsugamushi	GCF_900327275.1	1	0	1	1	1
d__bacteria	p__proteobacteria	c__alphaproteobacteria	o__rhizobiales	f__rhizobiaceae	g__oricola	s__Oricola thermophila	GCF_013358405.1	1	1	0	1	1
d__bacteria	p__verrucomicrobiota	c__verrucomicrobiae	o__opitutales	f__opitutaceae	g__opitutus	s__Opitutus terrae	GCF_000019965.1	1	1	0	1	1
d__bacteria	p__actinobacteriota	c__coriobacteriia	o__coriobacteriales	f__atopobiaceae	g__olsenella_f	s__Olsenella_F sp001189515	GCF_001189515.2	2	0	2	2	1
d__bacteria	p__actinobacteriota	c__coriobacteriia	o__coriobacteriales	f__atopobiaceae	g__olsenella	s__Olsenella uli	GCF_000143845.1	1	1	0	1	1
d__bacteria	p__bacteroidota	c__bacteroidia	o__flavobacteriales	f__flavobacteriaceae	g__olleya	s__Olleya sp004843725	GCF_004843725.1	6	6	0	6	1
d__bacteria	p__bacteroidota	c__bacteroidia	o__flavobacteriales	f__flavobacteriaceae	g__olleya	s__Olleya sp002831645	GCF_002831645.1	4	4	0	3	2
d__bacteria	p__proteobacteria	c__gammaproteobacteria	o__pseudomonadales	f__oleiphilaceae	g__oleiphilus	s__Oleiphilus messinensis	GCF_002162375.1	5	5	0	5	5
d__bacteria	p__actinobacteriota	c__actinomycetia	o__actinomycetales	f__cellulomonadaceae	g__oerskovia	s__Oerskovia sp005937995	GCF_005937995.2	4	4	0	4	1
d__bacteria	p__firmicutes	c__bacilli	o__lactobacillales	f__lactobacillaceae	g__oenococcus	s__Oenococcus sp004010835	GCF_004010835.2	2	2	0	2	1
d__bacteria	p__firmicutes	c__bacilli	o__lactobacillales	f__lactobacillaceae	g__oenococcus	s__Oenococcus sicerae	GCF_004102045.2	2	2	0	2	1
d__bacteria	p__proteobacteria	c__alphaproteobacteria	o__acetobacterales	f__acetobacteraceae	g__oecophyllibacter	s__Oecophyllibacter sp006542395	GCF_006542395.2	1	1	0	1	1
d__bacteria	p__proteobacteria	c__alphaproteobacteria	o__acetobacterales	f__acetobacteraceae	g__oecophyllibacter	s__Oecophyllibacter saccharovorans	GCF_006542375.1	1	1	0	1	1
d__bacteria	p__bacteroidota	c__bacteroidia	o__bacteroidales	f__marinifilaceae	g__odoribacter	s__Odoribacter splanchnicus	GCF_000190535.1	4	4	0	4	1
d__bacteria	p__proteobacteria	c__alphaproteobacteria	o__rhodobacterales	f__rhodobacteraceae	g__octadecabacter	s__Octadecabacter temperatus	GCF_001187845.1	1	1	0	1	1
d__bacteria	p__proteobacteria	c__alphaproteobacteria	o__rhodobacterales	f__rhodobacteraceae	g__octadecabacter	s__Octadecabacter arcticus	GCF_000155735.2	2	2	0	2	2
d__bacteria	p__proteobacteria	c__alphaproteobacteria	o__rhodobacterales	f__rhodobacteraceae	g__octadecabacter	s__Octadecabacter antarcticus	GCF_000155675.2	2	2	0	2	2
d__bacteria	p__proteobacteria	c__alphaproteobacteria	o__rhizobiales_a	f__rhizobiaceae_a	g__ochrobactrum_a	s__Ochrobactrum_A sp018798825	GCF_018798825.1	5	5	0	5	1
d__bacteria	p__proteobacteria	c__alphaproteobacteria	o__rhizobiales_a	f__rhizobiaceae_a	g__ochrobactrum_a	s__Ochrobactrum_A quorumnocens	GCF_002278035.1	4	4	0	4	1
d__bacteria	p__proteobacteria	c__alphaproteobacteria	o__rhizobiales_a	f__rhizobiaceae_a	g__ochrobactrum	s__Ochrobactrum anthropi	GCF_000017405.1	4	4	0	4	1
d__bacteria	p__firmicutes	c__bacilli	o__bacillales_d	f__amphibacillaceae	g__oceanobacillus	s__Oceanobacillus zhaokaii	GCF_003352005.1	10	10	0	10	3
d__bacteria	p__firmicutes	c__bacilli	o__bacillales_d	f__amphibacillaceae	g__oceanobacillus	s__Oceanobacillus iheyensis	GCF_000011245.1	7	7	0	7	3
d__bacteria	p__deinococcota	c__deinococci	o__deinococcales	f__marinithermaceae	g__oceanithermus	s__Oceanithermus profundus	GCF_000183745.1	2	2	0	2	1
d__bacteria	p__actinobacteriota	c__actinomycetia	o__actinomycetales	f__actinomycetaceae	g__oceanitalea	s__Oceanitalea sp006349365	GCF_006349365.1	3	3	0	3	1
d__bacteria	p__spirochaetota	c__spirochaetia	o__spirochaetales_e	f__spirochaetaceae_b	g__oceanispirochaeta	s__Oceanispirochaeta crateris	GCF_008329965.1	4	4	0	4	1
d__bacteria	p__proteobacteria	c__gammaproteobacteria	o__enterobacterales	f__aeromonadaceae	g__oceanisphaera	s__Oceanisphaera profunda	GCF_002157895.1	8	8	0	8	2
d__bacteria	p__proteobacteria	c__gammaproteobacteria	o__enterobacterales	f__aeromonadaceae	g__oceanisphaera	s__Oceanisphaera avium	GCF_002157875.1	8	8	0	8	2
d__bacteria	p__proteobacteria	c__gammaproteobacteria	o__enterobacterales	f__aeromonadaceae	g__oceanimonas	s__Oceanimonas sp000243075	GCF_000243075.1	7	7	0	7	2
d__bacteria	p__bacteroidota	c__bacteroidia	o__flavobacteriales	f__flavobacteriaceae	g__oceanihabitans	s__Oceanihabitans sp016864015	GCF_016864015.1	4	4	0	4	1
d__bacteria	p__proteobacteria	c__alphaproteobacteria	o__rhodobacterales	f__rhodobacteraceae	g__oceanicola	s__Oceanicola pacificus_A	GCF_016134045.1	2	2	0	2	2
d__bacteria	p__proteobacteria	c__gammaproteobacteria	o__pseudomonadales	f__dsm-21967	g__oceanicoccus	s__Oceanicoccus sagamiensis	GCF_002117105.1	2	2	0	2	1
d__bacteria	p__actinobacteriota	c__actinomycetia	o__actinomycetales	f__beutenbergiaceae	g__occultella	s__Occultella sp009708215	GCF_009708215.1	2	2	0	2	1
d__bacteria	p__proteobacteria	c__gammaproteobacteria	o__pseudomonadales	f__pseudomonadaceae	g__oblitimonas	s__Oblitimonas alkaliphila	GCF_001267175.1	5	5	0	5	1
d__bacteria	p__cyanobacteria	c__cyanobacteriia	o__elainellales	f__elainellaceae	g__o-77	s__O-77 sp013177315	GCF_013177315.1	2	2	0	2	1
d__bacteria	p__proteobacteria	c__alphaproteobacteria	o__caedimonadales	f__nucleicultricaceae	g__nucleicultrix	s__Nucleicultrix amoebiphila	GCF_002117145.1	2	2	0	2	1
d__bacteria	p__firmicutes	c__bacilli	o__erysipelotrichales	f__erysipelotrichaceae	g__nsj-61	s__NSJ-61 sp003433845	GCF_014337235.1	3	3	0	3	1
d__bacteria	p__firmicutes	c__bacilli	o__mycoplasmatales	f__vbwq01	g__nriv7	s__Nriv7 sp018831625	GCF_018831625.1	1	1	0	1	1
d__bacteria	p__proteobacteria	c__alphaproteobacteria	o__sphingomonadales	f__sphingomonadaceae	g__novosphingopyxis	s__Novosphingopyxis sp002683755	GCF_014334095.1	2	2	0	2	1
d__bacteria	p__proteobacteria	c__alphaproteobacteria	o__sphingomonadales	f__sphingomonadaceae	g__novosphingobium	s__Novosphingobium sp009707465	GCF_009707465.1	1	1	0	1	1
d__bacteria	p__proteobacteria	c__alphaproteobacteria	o__sphingomonadales	f__sphingomonadaceae	g__novosphingobium	s__Novosphingobium sp005145025	GCF_005145025.1	2	2	0	2	1
d__bacteria	p__proteobacteria	c__alphaproteobacteria	o__sphingomonadales	f__sphingomonadaceae	g__novosphingobium	s__Novosphingobium sp003454795	GCF_003454795.1	3	3	0	3	1
d__bacteria	p__proteobacteria	c__alphaproteobacteria	o__sphingomonadales	f__sphingomonadaceae	g__novosphingobium	s__Novosphingobium sp000876675	GCF_000876675.2	5	5	0	5	1
d__bacteria	p__proteobacteria	c__alphaproteobacteria	o__sphingomonadales	f__sphingomonadaceae	g__novosphingobium	s__Novosphingobium sp000813185	GCF_018417475.1	4	4	0	4	1
d__bacteria	p__proteobacteria	c__alphaproteobacteria	o__sphingomonadales	f__sphingomonadaceae	g__novosphingobium	s__Novosphingobium resinovorum	GCF_001742225.1	3	3	0	3	1
d__bacteria	p__proteobacteria	c__alphaproteobacteria	o__sphingomonadales	f__sphingomonadaceae	g__novosphingobium	s__Novosphingobium pentaromativorans	GCF_000767465.1	3	3	0	3	3
d__bacteria	p__proteobacteria	c__alphaproteobacteria	o__sphingomonadales	f__sphingomonadaceae	g__novosphingobium	s__Novosphingobium ginsenosidimutans	GCF_007954425.1	1	0	1	1	1
d__bacteria	p__proteobacteria	c__alphaproteobacteria	o__sphingomonadales	f__sphingomonadaceae	g__novosphingobium	s__Novosphingobium aromaticivorans	GCF_000013325.1	3	3	0	3	1
d__bacteria	p__proteobacteria	c__gammaproteobacteria	o__burkholderiales	f__burkholderiaceae	g__noviherbaspirillum	s__Noviherbaspirillum sp007874125	GCF_007874125.1	3	3	0	3	1
d__bacteria	p__firmicutes	c__bacilli	o__thermoactinomycetales	f__novibacillaceae	g__novibacillus	s__Novibacillus thermophilus	GCF_002005165.1	4	4	0	4	2
d__bacteria	p__cyanobacteria	c__cyanobacteriia	o__cyanobacteriales	f__nostocaceae	g__nostoc	s__Nostoc sphaeroides	GCF_003443655.1	4	4	0	4	2
d__bacteria	p__cyanobacteria	c__cyanobacteriia	o__cyanobacteriales	f__nostocaceae	g__nostoc	s__Nostoc sp013393905	GCF_013393905.1	3	3	0	3	2
d__bacteria	p__cyanobacteria	c__cyanobacteriia	o__cyanobacteriales	f__nostocaceae	g__nostoc	s__Nostoc sp013343235	GCF_013343235.1	3	3	0	3	2
d__bacteria	p__cyanobacteria	c__cyanobacteriia	o__cyanobacteriales	f__nostocaceae	g__nostoc	s__Nostoc sp002949795	GCF_002949795.1	3	3	0	3	1
d__bacteria	p__cyanobacteria	c__cyanobacteriia	o__cyanobacteriales	f__nostocaceae	g__nostoc	s__Nostoc sp002949735	GCF_002949735.1	4	4	0	4	2
d__bacteria	p__cyanobacteria	c__cyanobacteriia	o__cyanobacteriales	f__nostocaceae	g__nostoc	s__Nostoc punctiforme	GCF_000020025.1	4	4	0	4	2
d__bacteria	p__cyanobacteria	c__cyanobacteriia	o__cyanobacteriales	f__nostocaceae	g__nostoc	s__Nostoc flagelliforme_A	GCF_002813575.1	6	6	0	6	2
d__bacteria	p__cyanobacteria	c__cyanobacteriia	o__cyanobacteriales	f__nostocaceae	g__nostoc	s__Nostoc edaphicum_A	GCF_014023275.1	3	3	0	3	2
d__bacteria	p__proteobacteria	c__alphaproteobacteria	o__rhizobiales	f__aestuariivirgaceae	g__nordella	s__Nordella sp011046735	GCF_011046735.1	2	2	0	2	1
d__bacteria	p__bacteroidota	c__bacteroidia	o__flavobacteriales	f__flavobacteriaceae	g__nonlabens	s__Nonlabens sp012974865	GCF_012974865.1	3	3	0	3	1
d__bacteria	p__bacteroidota	c__bacteroidia	o__flavobacteriales	f__flavobacteriaceae	g__nonlabens	s__Nonlabens sp002831625	GCF_002831625.1	3	3	0	3	1
d__bacteria	p__bacteroidota	c__bacteroidia	o__flavobacteriales	f__flavobacteriaceae	g__nonlabens	s__Nonlabens ponticola	GCF_003966335.1	2	2	0	2	1
d__bacteria	p__bacteroidota	c__bacteroidia	o__flavobacteriales	f__flavobacteriaceae	g__nonlabens	s__Nonlabens dokdonensis	GCF_000332115.1	2	2	0	2	1
d__bacteria	p__cyanobacteria	c__cyanobacteriia	o__phormidesmiales	f__phormidesmiaceae	g__nodosilinea	s__Nodosilinea sp016403105	GCF_016403105.1	2	2	0	2	1
d__bacteria	p__actinobacteriota	c__actinomycetia	o__streptosporangiales	f__streptosporangiaceae	g__nocardiopsis_c	s__Nocardiopsis_C gilva	GCF_002263495.1	6	6	0	6	1
d__bacteria	p__actinobacteriota	c__actinomycetia	o__streptosporangiales	f__streptosporangiaceae	g__nocardiopsis	s__Nocardiopsis dassonvillei	GCF_000092985.1	5	5	0	5	1
d__bacteria	p__actinobacteriota	c__actinomycetia	o__propionibacteriales	f__nocardioidaceae	g__nocardioides_b	s__Nocardioides_B mesophilus	GCF_014395785.1	2	2	0	2	1
d__bacteria	p__actinobacteriota	c__actinomycetia	o__propionibacteriales	f__nocardioidaceae	g__nocardioides	s__Nocardioides ungokensis	GCF_013466985.1	2	2	0	2	1
d__bacteria	p__actinobacteriota	c__actinomycetia	o__propionibacteriales	f__nocardioidaceae	g__nocardioides	s__Nocardioides sp018388425	GCF_018388425.1	3	3	0	3	1
d__bacteria	p__actinobacteriota	c__actinomycetia	o__propionibacteriales	f__nocardioidaceae	g__nocardioides	s__Nocardioides sp017310035	GCF_017310035.1	2	2	0	2	1
d__bacteria	p__actinobacteriota	c__actinomycetia	o__propionibacteriales	f__nocardioidaceae	g__nocardioides	s__Nocardioides sp014265965	GCF_017086465.1	2	2	0	2	1
d__bacteria	p__actinobacteriota	c__actinomycetia	o__propionibacteriales	f__nocardioidaceae	g__nocardioides	s__Nocardioides sp014127485	GCF_014127485.1	2	2	0	2	1
d__bacteria	p__actinobacteriota	c__actinomycetia	o__propionibacteriales	f__nocardioidaceae	g__nocardioides	s__Nocardioides sp014108865	GCF_014108865.1	2	2	0	2	1
d__bacteria	p__actinobacteriota	c__actinomycetia	o__propionibacteriales	f__nocardioidaceae	g__nocardioides	s__Nocardioides sp013624415	GCF_013624435.2	3	3	0	3	1
d__bacteria	p__actinobacteriota	c__actinomycetia	o__propionibacteriales	f__nocardioidaceae	g__nocardioides	s__Nocardioides sp013177455	GCF_013177455.1	3	3	0	3	1
d__bacteria	p__actinobacteriota	c__actinomycetia	o__propionibacteriales	f__nocardioidaceae	g__nocardioides	s__Nocardioides sp012272695	GCF_012272695.1	2	2	0	2	1
d__bacteria	p__actinobacteriota	c__actinomycetia	o__propionibacteriales	f__nocardioidaceae	g__nocardioides	s__Nocardioides sp011420305	GCF_011420305.2	4	4	0	4	1
d__bacteria	p__actinobacteriota	c__actinomycetia	o__propionibacteriales	f__nocardioidaceae	g__nocardioides	s__Nocardioides sp009557055	GCF_009557055.1	4	4	0	4	1
d__bacteria	p__actinobacteriota	c__actinomycetia	o__propionibacteriales	f__nocardioidaceae	g__nocardioides	s__Nocardioides sp006007965	GCF_006007965.1	3	3	0	3	1
d__bacteria	p__actinobacteriota	c__actinomycetia	o__propionibacteriales	f__nocardioidaceae	g__nocardioides	s__Nocardioides sp004014875	GCF_004014875.1	6	6	0	6	1
d__bacteria	p__actinobacteriota	c__actinomycetia	o__propionibacteriales	f__nocardioidaceae	g__nocardioides	s__Nocardioides sp003710085	GCF_003710085.1	3	3	0	3	1
d__bacteria	p__actinobacteriota	c__actinomycetia	o__propionibacteriales	f__nocardioidaceae	g__nocardioides	s__Nocardioides sp000015265	GCF_000015265.1	2	2	0	2	1
d__bacteria	p__actinobacteriota	c__actinomycetia	o__propionibacteriales	f__nocardioidaceae	g__nocardioides	s__Nocardioides seonyuensis	GCF_004683965.1	2	2	0	2	1
d__bacteria	p__actinobacteriota	c__actinomycetia	o__propionibacteriales	f__nocardioidaceae	g__nocardioides	s__Nocardioides sambongensis	GCF_006494815.1	3	3	0	3	1
d__bacteria	p__actinobacteriota	c__actinomycetia	o__propionibacteriales	f__nocardioidaceae	g__nocardioides	s__Nocardioides piscis	GCF_011300215.1	2	2	0	2	1
d__bacteria	p__actinobacteriota	c__actinomycetia	o__propionibacteriales	f__nocardioidaceae	g__nocardioides	s__Nocardioides marinisabuli	GCF_013466785.1	3	3	0	3	1
d__bacteria	p__actinobacteriota	c__actinomycetia	o__propionibacteriales	f__nocardioidaceae	g__nocardioides	s__Nocardioides humi	GCF_006494775.1	2	2	0	1	1
d__bacteria	p__actinobacteriota	c__actinomycetia	o__propionibacteriales	f__nocardioidaceae	g__nocardioides	s__Nocardioides houyundeii	GCF_002865585.1	3	3	0	3	1
d__bacteria	p__actinobacteriota	c__actinomycetia	o__propionibacteriales	f__nocardioidaceae	g__nocardioides	s__Nocardioides euryhalodurans	GCF_004564375.1	2	2	0	2	1
d__bacteria	p__actinobacteriota	c__actinomycetia	o__propionibacteriales	f__nocardioidaceae	g__nocardioides	s__Nocardioides dongxiaopingii	GCF_005954645.2	2	2	0	2	1
d__bacteria	p__actinobacteriota	c__actinomycetia	o__propionibacteriales	f__nocardioidaceae	g__nocardioides	s__Nocardioides dokdonensis	GCF_001653335.1	3	3	0	3	1
d__bacteria	p__actinobacteriota	c__actinomycetia	o__propionibacteriales	f__nocardioidaceae	g__nocardioides	s__Nocardioides daphniae	GCF_004777465.1	3	3	0	3	1
d__bacteria	p__actinobacteriota	c__actinomycetia	o__propionibacteriales	f__nocardioidaceae	g__nocardioides	s__Nocardioides cynanchi	GCF_008761635.1	2	2	0	2	1
d__bacteria	p__actinobacteriota	c__actinomycetia	o__propionibacteriales	f__nocardioidaceae	g__nocardioides	s__Nocardioides baekrokdamisoli	GCF_003945325.1	2	2	0	2	1
d__bacteria	p__actinobacteriota	c__actinomycetia	o__propionibacteriales	f__nocardioidaceae	g__nocardioides	s__Nocardioides aquaticus	GCF_018459925.1	2	2	0	2	1
d__bacteria	p__actinobacteriota	c__actinomycetia	o__propionibacteriales	f__nocardioidaceae	g__nocardioides	s__Nocardioides anomalus	GCF_011046535.1	1	1	0	1	1
d__bacteria	p__actinobacteriota	c__actinomycetia	o__mycobacteriales	f__mycobacteriaceae	g__nocardia	s__Nocardia wallacei	GCF_014466955.1	3	3	0	3	1
d__bacteria	p__actinobacteriota	c__actinomycetia	o__mycobacteriales	f__mycobacteriaceae	g__nocardia	s__Nocardia tengchongensis	GCF_018362975.1	3	3	0	3	1
d__bacteria	p__actinobacteriota	c__actinomycetia	o__mycobacteriales	f__mycobacteriaceae	g__nocardia	s__Nocardia sp013744875	GCF_013744875.1	4	4	0	4	1
d__bacteria	p__actinobacteriota	c__actinomycetia	o__mycobacteriales	f__mycobacteriaceae	g__nocardia	s__Nocardia nova_A	GCF_000523235.1	3	3	0	3	1
d__bacteria	p__actinobacteriota	c__actinomycetia	o__mycobacteriales	f__mycobacteriaceae	g__nocardia	s__Nocardia mangyaensis	GCF_001886715.1	3	3	0	3	1
d__bacteria	p__actinobacteriota	c__actinomycetia	o__mycobacteriales	f__mycobacteriaceae	g__nocardia	s__Nocardia iowensis	GCF_019222765.1	3	3	0	3	2
d__bacteria	p__actinobacteriota	c__actinomycetia	o__mycobacteriales	f__mycobacteriaceae	g__nocardia	s__Nocardia farcinica	GCF_001182745.1	3	3	0	3	2
d__bacteria	p__actinobacteriota	c__actinomycetia	o__mycobacteriales	f__mycobacteriaceae	g__nocardia	s__Nocardia cyriacigeorgica_B	GCF_000284035.1	3	3	0	3	1
d__bacteria	p__actinobacteriota	c__actinomycetia	o__mycobacteriales	f__mycobacteriaceae	g__nocardia	s__Nocardia brasiliensis_C	GCF_011801125.1	3	3	0	3	1
d__bacteria	p__actinobacteriota	c__actinomycetia	o__mycobacteriales	f__mycobacteriaceae	g__nocardia	s__Nocardia brasiliensis_B	GCF_000250675.2	3	3	0	3	1
d__bacteria	p__actinobacteriota	c__actinomycetia	o__mycobacteriales	f__mycobacteriaceae	g__nocardia	s__Nocardia asteroides	GCF_900637185.1	5	5	0	5	2
d__bacteria	p__actinobacteriota	c__actinomycetia	o__mycobacteriales	f__mycobacteriaceae	g__nocardia	s__Nocardia arthritidis_A	GCF_011801145.1	3	3	0	3	2
d__bacteria	p__proteobacteria	c__alphaproteobacteria	o__azospirillales	f__azospirillaceae	g__niveispirillum	s__Niveispirillum cyanobacteriorum	GCF_002868735.1	4	4	0	4	1
d__bacteria	p__proteobacteria	c__gammaproteobacteria	o__burkholderiales	f__rhodocyclaceae	g__niveibacterium	s__Niveibacterium microcysteis	GCF_017161445.1	5	5	0	5	1
d__bacteria	p__proteobacteria	c__gammaproteobacteria	o__burkholderiales	f__gallionellaceae	g__nitrotoga	s__Nitrotoga sp013168275	GCF_013168275.1	2	2	0	2	1
d__bacteria	p__proteobacteria	c__alphaproteobacteria	o__azospirillales	f__azospirillaceae	g__nitrospirillum	s__Nitrospirillum amazonense	GCF_000730165.1	5	5	0	5	2
d__bacteria	p__nitrospirota	c__nitrospiria	o__nitrospirales	f__nitrospiraceae	g__nitrospira_f	s__Nitrospira_F inopinata	GCF_001458695.1	1	1	0	0	0
d__bacteria	p__nitrospirota	c__nitrospiria	o__nitrospirales	f__nitrospiraceae	g__nitrospira_e	s__Nitrospira_E moscoviensis	GCF_001273775.1	1	1	0	0	0
d__bacteria	p__nitrospirota	c__nitrospiria	o__nitrospirales	f__nitrospiraceae	g__nitrospira_c	s__Nitrospira_C sp011405515	GCF_011405515.1	1	1	0	0	0
d__bacteria	p__nitrospirota	c__nitrospiria	o__nitrospirales	f__nitrospiraceae	g__nitrospira_c	s__Nitrospira_C japonica	GCF_900169565.1	1	1	0	0	0
d__archaea	p__thermoproteota	c__nitrososphaeria	o__nitrososphaerales	f__nitrosopumilaceae	g__nitrosotenuis	s__Nitrosotenuis sp013407275	GCF_013407275.1	1	1	0	1	1
d__archaea	p__thermoproteota	c__nitrososphaeria	o__nitrososphaerales	f__nitrosopumilaceae	g__nitrosotenuis	s__Nitrosotenuis cloacae	GCF_000955905.1	1	1	0	1	1
d__archaea	p__thermoproteota	c__nitrososphaeria	o__nitrososphaerales	f__nitrosopumilaceae	g__nitrosotenuis	s__Nitrosotenuis aquarius	GCF_002787055.1	1	1	0	1	1
d__bacteria	p__proteobacteria	c__gammaproteobacteria	o__burkholderiales	f__nitrosomonadaceae	g__nitrosospira	s__Nitrosospira multiformis	GCF_000196355.1	1	1	0	1	1
d__bacteria	p__proteobacteria	c__gammaproteobacteria	o__burkholderiales	f__nitrosomonadaceae	g__nitrosospira	s__Nitrosospira lacus	GCF_000355765.4	1	1	0	1	1
d__bacteria	p__proteobacteria	c__gammaproteobacteria	o__burkholderiales	f__nitrosomonadaceae	g__nitrosospira	s__Nitrosospira briensis	GCF_000619905.2	1	1	0	1	1
d__archaea	p__thermoproteota	c__nitrososphaeria	o__nitrososphaerales	f__nitrososphaeraceae	g__nitrososphaera	s__Nitrososphaera viennensis	GCF_000698785.1	1	1	0	1	1
d__archaea	p__thermoproteota	c__nitrososphaeria	o__nitrososphaerales	f__nitrososphaeraceae	g__nitrososphaera	s__Nitrososphaera gargensis	GCF_000303155.1	1	1	0	1	1
d__archaea	p__thermoproteota	c__nitrososphaeria	o__nitrososphaerales	f__nitrososphaeraceae	g__nitrososphaera	s__Nitrososphaera evergladensis	GCF_000730285.1	1	1	0	1	1
d__archaea	p__thermoproteota	c__nitrososphaeria	o__nitrososphaerales	f__nitrosopumilaceae	g__nitrosopumilus	s__Nitrosopumilus ureiphilus	GCF_013407185.1	1	1	0	1	1
d__archaea	p__thermoproteota	c__nitrososphaeria	o__nitrososphaerales	f__nitrosopumilaceae	g__nitrosopumilus	s__Nitrosopumilus sp006740685	GCF_006740685.1	1	1	0	1	1
d__archaea	p__thermoproteota	c__nitrososphaeria	o__nitrososphaerales	f__nitrosopumilaceae	g__nitrosopumilus	s__Nitrosopumilus sediminis	GCF_000299395.1	1	1	0	1	1
d__archaea	p__thermoproteota	c__nitrososphaeria	o__nitrososphaerales	f__nitrosopumilaceae	g__nitrosopumilus	s__Nitrosopumilus piranensis	GCF_000875775.1	1	1	0	1	1
d__archaea	p__thermoproteota	c__nitrososphaeria	o__nitrososphaerales	f__nitrosopumilaceae	g__nitrosopumilus	s__Nitrosopumilus oxyclinae	GCF_013407165.1	1	1	0	1	1
d__archaea	p__thermoproteota	c__nitrososphaeria	o__nitrososphaerales	f__nitrosopumilaceae	g__nitrosopumilus	s__Nitrosopumilus maritimus	GCF_000018465.1	1	1	0	1	1
d__archaea	p__thermoproteota	c__nitrososphaeria	o__nitrososphaerales	f__nitrosopumilaceae	g__nitrosopumilus	s__Nitrosopumilus koreensis	GCF_000299365.1	1	1	0	1	1
d__archaea	p__thermoproteota	c__nitrososphaeria	o__nitrososphaerales	f__nitrosopumilaceae	g__nitrosopumilus	s__Nitrosopumilus cobalaminigenes	GCF_013407145.1	1	1	0	1	1
d__archaea	p__thermoproteota	c__nitrososphaeria	o__nitrososphaerales	f__nitrosopumilaceae	g__nitrosopumilus	s__Nitrosopumilus catalinensis	GCF_002156965.1	1	1	0	1	1
[truncated: 2,720 more rows]

## Sheet: 23S species
Domain	Phylum	Class	Order	Family	Genus	Species	Genome Accession	Number of LTs	Number of LTs With Predicted LT Helix	Number of LTs Without Predicted LT Helix	Number of LTs with Enough nts for Covariation Method	Number of Unique LT Clusters
d__bacteria	p__proteobacteria	c__alphaproteobacteria	o__sphingomonadales	f__sphingomonadaceae	g__zymomonas	s__Zymomonas pomaceae	GCF_000218875.1	3	3	0	3	1
d__bacteria	p__proteobacteria	c__alphaproteobacteria	o__sphingomonadales	f__sphingomonadaceae	g__zymomonas	s__Zymomonas mobilis	GCF_000175255.2	2	2	0	2	1
d__bacteria	p__proteobacteria	c__gammaproteobacteria	o__pseudomonadales	f__halomonadaceae	g__zymobacter	s__Zymobacter palmae	GCF_003610015.1	8	8	0	8	1
d__bacteria	p__bacteroidota	c__bacteroidia	o__flavobacteriales	f__flavobacteriaceae	g__zunongwangia	s__Zunongwangia profunda	GCF_000023465.1	3	3	0	3	1
d__bacteria	p__bacteroidota	c__bacteroidia	o__flavobacteriales	f__flavobacteriaceae	g__zobellia	s__Zobellia galactanivorans	GCF_000973105.1	2	2	0	2	1
d__bacteria	p__actinobacteriota	c__actinomycetia	o__actinomycetales	f__microbacteriaceae	g__zj450	s__ZJ450 sp011751885	GCF_011751885.2	2	2	0	2	1
d__bacteria	p__actinobacteriota	c__actinomycetia	o__actinomycetales	f__microbacteriaceae	g__zj450	s__ZJ450 sp009755725	GCF_009755725.1	2	2	0	2	1
d__bacteria	p__actinobacteriota	c__actinomycetia	o__actinomycetales	f__actinomycetaceae	g__zj293	s__ZJ293 sp011751725	GCF_011751945.2	3	3	0	3	1
d__bacteria	p__proteobacteria	c__gammaproteobacteria	o__pseudomonadales	f__spongiibacteraceae	g__zhongshania	s__Zhongshania aliphaticivorans	GCF_001586255.1	3	3	0	3	1
d__bacteria	p__proteobacteria	c__alphaproteobacteria	o__rhizobiales	f__xanthobacteraceae	g__z2-yc6860	s__Z2-YC6860 sp001579845	GCF_001579845.1	1	0	1	1	1
d__bacteria	p__campylobacterota	c__campylobacteria	o__campylobacterales	f__nitratiruptoraceae	g__yy08-10	s__YY08-10 sp016629565	GCF_016629565.1	3	3	0	3	1
d__bacteria	p__campylobacterota	c__campylobacteria	o__campylobacterales	f__nitratiruptoraceae	g__yy08-10	s__YY08-10 sp000010325	GCF_000010325.1	3	3	0	3	1
d__bacteria	p__proteobacteria	c__alphaproteobacteria	o__rhizobiales	f__devosiaceae	g__youhaiella	s__Youhaiella tibetensis	GCF_008000755.1	2	2	0	2	1
d__bacteria	p__proteobacteria	c__alphaproteobacteria	o__rhodobacterales	f__rhodobacteraceae	g__yoonia	s__Yoonia vestfoldensis_B	GCF_002158905.1	2	2	0	2	2
d__bacteria	p__actinobacteriota	c__actinomycetia	o__actinomycetales	f__microbacteriaceae	g__yonghaparkia	s__Yonghaparkia sp012530535	GCA_012530535.1	2	2	0	2	1
d__bacteria	p__actinobacteriota	c__actinomycetia	o__actinomycetales	f__dermatophilaceae	g__yimella	s__Yimella sp014530045	GCF_017654605.1	2	2	0	2	1
d__bacteria	p__proteobacteria	c__gammaproteobacteria	o__enterobacterales	f__enterobacteriaceae	g__yersinia	s__Yersinia mollaretii	GCF_013282725.1	7	7	0	7	2
d__bacteria	p__proteobacteria	c__gammaproteobacteria	o__enterobacterales	f__enterobacteriaceae	g__yersinia	s__Yersinia intermedia	GCF_900635455.1	7	7	0	7	1
d__bacteria	p__proteobacteria	c__gammaproteobacteria	o__enterobacterales	f__enterobacteriaceae	g__yersinia	s__Yersinia hibernica	GCF_004124235.1	7	7	0	7	3
d__bacteria	p__proteobacteria	c__gammaproteobacteria	o__enterobacterales	f__enterobacteriaceae	g__yersinia	s__Yersinia enterocolitica	GCF_901472495.1	7	7	0	7	2
d__bacteria	p__proteobacteria	c__gammaproteobacteria	o__enterobacterales	f__enterobacteriaceae	g__yersinia	s__Yersinia canariae	GCF_009831415.1	7	7	0	7	2
d__bacteria	p__proteobacteria	c__gammaproteobacteria	o__enterobacterales	f__enterobacteriaceae	g__yersinia	s__Yersinia aleksiciae	GCF_001047675.1	7	7	0	7	1
d__bacteria	p__proteobacteria	c__gammaproteobacteria	o__burkholderiales	f__burkholderiaceae	g__xylophilus	s__Xylophilus rhododendri	GCF_009906855.1	3	3	0	3	1
d__bacteria	p__proteobacteria	c__gammaproteobacteria	o__xanthomonadales	f__xanthomonadaceae	g__xylella	s__Xylella taiwanensis	GCF_013177435.1	2	2	0	2	1
d__bacteria	p__proteobacteria	c__gammaproteobacteria	o__xanthomonadales	f__xanthomonadaceae	g__xylella	s__Xylella fastidiosa	GCF_011801475.1	2	2	0	2	1
d__bacteria	p__actinobacteriota	c__actinomycetia	o__actinomycetales	f__cellulomonadaceae	g__xylanimonas	s__Xylanimonas sp004135385	GCF_004135385.1	3	3	0	3	1
d__bacteria	p__actinobacteriota	c__actinomycetia	o__actinomycetales	f__cellulomonadaceae	g__xylanimonas	s__Xylanimonas cellulosilytica	GCF_000024965.1	3	3	0	3	1
d__bacteria	p__actinobacteriota	c__actinomycetia	o__actinomycetales	f__cellulomonadaceae	g__xylanimonas	s__Xylanimonas allomyrinae	GCF_004135345.1	3	3	0	3	1
d__bacteria	p__verrucomicrobiota	c__verrucomicrobiae	o__chthoniobacterales	f__xiphinematobacteraceae	g__xiphinematobacter	s__Xiphinematobacter sp001318295	GCF_001318295.1	1	1	0	1	1
d__bacteria	p__proteobacteria	c__gammaproteobacteria	o__enterobacterales	f__enterobacteriaceae	g__xenorhabdus	s__Xenorhabdus poinarii	GCF_000968175.1	7	7	0	7	3
d__bacteria	p__proteobacteria	c__gammaproteobacteria	o__enterobacterales	f__enterobacteriaceae	g__xenorhabdus	s__Xenorhabdus doucetiae	GCF_000968195.1	7	7	0	7	2
d__bacteria	p__proteobacteria	c__gammaproteobacteria	o__enterobacterales	f__enterobacteriaceae	g__xenorhabdus	s__Xenorhabdus bovienii_C	GCF_000027225.1	7	7	0	7	2
d__bacteria	p__proteobacteria	c__gammaproteobacteria	o__enterobacterales	f__enterobacteriaceae	g__xenorhabdus	s__Xenorhabdus bovienii	GCF_000973125.1	7	7	0	7	1
d__bacteria	p__proteobacteria	c__gammaproteobacteria	o__xanthomonadales	f__xanthomonadaceae	g__xanthomonas_a	s__Xanthomonas_A theicola	GCF_014236795.1	2	2	0	2	1
d__bacteria	p__proteobacteria	c__gammaproteobacteria	o__xanthomonadales	f__xanthomonadaceae	g__xanthomonas_a	s__Xanthomonas_A sp014236855	GCF_014236855.1	2	2	0	2	2
d__bacteria	p__proteobacteria	c__gammaproteobacteria	o__xanthomonadales	f__xanthomonadaceae	g__xanthomonas_a	s__Xanthomonas_A hyacinthi	GCF_009769165.1	2	2	0	2	1
d__bacteria	p__proteobacteria	c__gammaproteobacteria	o__xanthomonadales	f__xanthomonadaceae	g__xanthomonas	s__Xanthomonas vesicatoria	GCF_001908725.1	2	2	0	2	2
d__bacteria	p__proteobacteria	c__gammaproteobacteria	o__xanthomonadales	f__xanthomonadaceae	g__xanthomonas	s__Xanthomonas sp905142465	GCF_905142465.1	2	2	0	2	2
d__bacteria	p__proteobacteria	c__gammaproteobacteria	o__xanthomonadales	f__xanthomonadaceae	g__xanthomonas	s__Xanthomonas phaseoli	GCF_003999565.1	2	2	0	2	2
d__bacteria	p__proteobacteria	c__gammaproteobacteria	o__xanthomonadales	f__xanthomonadaceae	g__xanthomonas	s__Xanthomonas oryzae	GCF_004136375.1	2	2	0	2	2
d__bacteria	p__proteobacteria	c__gammaproteobacteria	o__xanthomonadales	f__xanthomonadaceae	g__xanthomonas	s__Xanthomonas fragariae_A	GCF_017603965.1	2	2	0	2	2
d__bacteria	p__proteobacteria	c__gammaproteobacteria	o__xanthomonadales	f__xanthomonadaceae	g__xanthomonas	s__Xanthomonas fragariae	GCF_900183975.1	2	2	0	2	2
d__bacteria	p__proteobacteria	c__gammaproteobacteria	o__xanthomonadales	f__xanthomonadaceae	g__xanthomonas	s__Xanthomonas campestris_C	GCF_012848175.1	2	2	0	2	2
d__bacteria	p__proteobacteria	c__gammaproteobacteria	o__xanthomonadales	f__xanthomonadaceae	g__xanthomonas	s__Xanthomonas campestris	GCF_000007145.1	2	2	0	2	2
d__bacteria	p__proteobacteria	c__alphaproteobacteria	o__rhizobiales	f__xanthobacteraceae	g__xanthobacter	s__Xanthobacter sp016807805	GCF_016807805.1	2	2	0	2	1
d__bacteria	p__actinobacteriota	c__actinomycetia	o__mycobacteriales	f__mycobacteriaceae	g__x156	s__X156 sp004006015	GCF_004006015.1	3	3	0	3	1
d__bacteria	p__actinobacteriota	c__actinomycetia	o__actinomycetales	f__microbacteriaceae	g__wsta01	s__WSTA01 sp018024495	GCF_018024495.1	2	2	0	2	1
d__bacteria	p__campylobacterota	c__campylobacteria	o__campylobacterales	f__helicobacteraceae	g__wolinella	s__Wolinella succinogenes	GCF_000196135.1	3	3	0	3	1
d__bacteria	p__proteobacteria	c__alphaproteobacteria	o__rickettsiales	f__anaplasmataceae	g__wolbachia	s__Wolbachia sp013365495	GCF_013365495.1	1	1	0	1	1
d__bacteria	p__proteobacteria	c__alphaproteobacteria	o__rickettsiales	f__anaplasmataceae	g__wolbachia	s__Wolbachia sp013365475	GCF_013365475.1	1	1	0	1	1
d__bacteria	p__proteobacteria	c__alphaproteobacteria	o__rickettsiales	f__anaplasmataceae	g__wolbachia	s__Wolbachia sp013365455	GCF_013365455.1	1	1	0	1	1
d__bacteria	p__proteobacteria	c__alphaproteobacteria	o__rickettsiales	f__anaplasmataceae	g__wolbachia	s__Wolbachia sp013365435	GCF_013365435.1	1	1	0	1	1
d__bacteria	p__proteobacteria	c__alphaproteobacteria	o__rickettsiales	f__anaplasmataceae	g__wolbachia	s__Wolbachia sp012277315	GCF_012277315.1	1	1	0	1	1
d__bacteria	p__proteobacteria	c__alphaproteobacteria	o__rickettsiales	f__anaplasmataceae	g__wolbachia	s__Wolbachia sp012277295	GCF_012277295.1	1	1	0	1	1
d__bacteria	p__proteobacteria	c__alphaproteobacteria	o__rickettsiales	f__anaplasmataceae	g__wolbachia	s__Wolbachia sp001931755	GCF_001931755.2	1	1	0	1	1
d__bacteria	p__proteobacteria	c__alphaproteobacteria	o__rickettsiales	f__anaplasmataceae	g__wolbachia	s__Wolbachia sp001439985	GCF_018141665.1	1	1	0	1	1
d__bacteria	p__proteobacteria	c__alphaproteobacteria	o__rickettsiales	f__anaplasmataceae	g__wolbachia	s__Wolbachia sp000829315	GCF_000829315.1	1	1	0	1	1
d__bacteria	p__proteobacteria	c__alphaproteobacteria	o__rickettsiales	f__anaplasmataceae	g__wolbachia	s__Wolbachia sp000376585	GCF_000376585.1	1	1	0	1	1
d__bacteria	p__proteobacteria	c__alphaproteobacteria	o__rickettsiales	f__anaplasmataceae	g__wolbachia	s__Wolbachia sp000306885	GCF_000306885.1	1	1	0	1	1
d__bacteria	p__proteobacteria	c__alphaproteobacteria	o__rickettsiales	f__anaplasmataceae	g__wolbachia	s__Wolbachia sp000008385	GCF_000008385.1	1	1	0	1	1
d__bacteria	p__proteobacteria	c__alphaproteobacteria	o__rickettsiales	f__anaplasmataceae	g__wolbachia	s__Wolbachia pipientis_C	GCF_004171285.1	1	1	0	1	1
d__bacteria	p__proteobacteria	c__alphaproteobacteria	o__rickettsiales	f__anaplasmataceae	g__wolbachia	s__Wolbachia pipientis	GCF_000008025.1	1	1	0	1	1
d__bacteria	p__proteobacteria	c__gammaproteobacteria	o__woeseiales	f__woeseiaceae	g__woeseia	s__Woeseia oceani	GCF_001677435.1	1	1	0	1	1
d__bacteria	p__bacteroidota	c__bacteroidia	o__flavobacteriales	f__flavobacteriaceae	g__wocania	s__Wocania sp009498295	GCF_009498295.1	4	4	0	4	1
d__bacteria	p__bacteroidota	c__bacteroidia	o__flavobacteriales	f__flavobacteriaceae	g__winogradskyella	s__Winogradskyella sp001971725	GCF_001971725.1	2	2	0	2	1
d__bacteria	p__bacteroidota	c__bacteroidia	o__flavobacteriales	f__flavobacteriaceae	g__winogradskyella	s__Winogradskyella sp000828715	GCF_000828715.1	2	2	0	2	1
d__bacteria	p__bacteroidota	c__bacteroidia	o__flavobacteriales	f__flavobacteriaceae	g__winogradskyella	s__Winogradskyella schleiferi	GCF_013394655.1	2	2	0	2	1
d__bacteria	p__bacteroidota	c__bacteroidia	o__flavobacteriales	f__flavobacteriaceae	g__winogradskyella	s__Winogradskyella forsetii	GCF_013394595.1	2	2	0	2	1
d__bacteria	p__firmicutes	c__bacilli	o__mycoplasmatales	f__mycoplasmataceae	g__williamsoniiplasma	s__Williamsoniiplasma somnilux	GCF_002804005.1	1	1	0	1	1
d__bacteria	p__firmicutes	c__bacilli	o__mycoplasmatales	f__mycoplasmataceae	g__williamsoniiplasma	s__Williamsoniiplasma luminosum	GCF_002803985.1	1	1	0	1	1
d__bacteria	p__firmicutes	c__bacilli	o__mycoplasmatales	f__mycoplasmataceae	g__williamsoniiplasma	s__Williamsoniiplasma freundtii	GCF_002804205.1	2	2	0	2	1
d__bacteria	p__proteobacteria	c__gammaproteobacteria	o__enterobacterales_a	f__enterobacteriaceae_a	g__wigglesworthia	s__Wigglesworthia glossinidia_B	GCF_000247565.1	2	2	0	2	1
d__bacteria	p__cyanobacteria	c__cyanobacteriia	o__pcc-6307	f__cyanobiaceae	g__wh-5701	s__WH-5701 sp015841355	GCF_015841355.1	2	2	0	2	1
d__bacteria	p__proteobacteria	c__gammaproteobacteria	o__xanthomonadales	f__wenzhouxiangellaceae	g__wenzhouxiangella	s__Wenzhouxiangella sp014725735	GCF_014725735.1	1	1	0	1	1
d__bacteria	p__proteobacteria	c__gammaproteobacteria	o__xanthomonadales	f__wenzhouxiangellaceae	g__wenzhouxiangella	s__Wenzhouxiangella marina	GCF_001187785.1	1	1	0	1	1
d__bacteria	p__bacteroidota	c__bacteroidia	o__flavobacteriales	f__flavobacteriaceae	g__wenyingzhuangia	s__Wenyingzhuangia fucanilytica	GCF_001697185.1	4	4	0	4	1
d__bacteria	p__firmicutes	c__bacilli	o__bacillales_b	f__bacillaceae_c	g__weizmannia	s__Weizmannia coagulans_A	GCF_000169195.2	10	10	0	10	3
d__bacteria	p__firmicutes	c__bacilli	o__lactobacillales	f__lactobacillaceae	g__weissella_a	s__Weissella_A cryptocerci	GCF_004358325.1	7	7	0	7	2
d__bacteria	p__firmicutes	c__bacilli	o__lactobacillales	f__lactobacillaceae	g__weissella	s__Weissella soli	GCF_001761545.1	6	6	0	6	2
d__bacteria	p__firmicutes	c__bacilli	o__lactobacillales	f__lactobacillaceae	g__weissella	s__Weissella hellenica_B	GCF_006777025.1	8	8	0	8	2
d__bacteria	p__firmicutes	c__bacilli	o__lactobacillales	f__lactobacillaceae	g__weissella	s__Weissella diestrammenae	GCF_014397255.1	5	5	0	5	1
d__bacteria	p__firmicutes	c__bacilli	o__lactobacillales	f__lactobacillaceae	g__weissella	s__Weissella confusa_B	GCF_004771295.1	9	9	0	9	2
d__bacteria	p__firmicutes	c__bacilli	o__lactobacillales	f__lactobacillaceae	g__weissella	s__Weissella coleopterorum	GCF_011304355.1	5	5	0	5	1
d__bacteria	p__firmicutes	c__bacilli	o__lactobacillales	f__lactobacillaceae	g__weissella	s__Weissella ceti_A	GCF_000750535.1	6	6	0	6	2
d__bacteria	p__bacteroidota	c__bacteroidia	o__flavobacteriales	f__weeksellaceae	g__weeksella	s__Weeksella virosa	GCF_000189415.1	5	5	0	5	1
d__bacteria	p__bacteroidota	c__bacteroidia	o__flavobacteriales	f__blattabacteriaceae	g__walczuchella	s__Walczuchella monophlebidarum	GCF_000709555.1	1	1	0	1	1
d__bacteria	p__chlamydiota	c__chlamydiia	o__chlamydiales	f__waddliaceae	g__waddlia	s__Waddlia chondrophila	GCF_000092785.1	2	2	0	2	1
d__bacteria	p__myxococcota	c__myxococcia	o__myxococcales	f__vulgatibacteraceae	g__vulgatibacter	s__Vulgatibacter incomptus	GCF_001263175.1	3	3	0	3	1
d__bacteria	p__cyanobacteria	c__cyanobacteriia	o__pcc-6307	f__cyanobiaceae	g__vulcanococcus	s__Vulcanococcus sp014217875	GCF_014217875.1	3	3	0	3	1
d__bacteria	p__cyanobacteria	c__cyanobacteriia	o__pcc-6307	f__cyanobiaceae	g__vulcanococcus	s__Vulcanococcus sp000179235	GCF_000179235.2	3	3	0	3	2
d__archaea	p__thermoproteota	c__thermoproteia	o__thermoproteales	f__thermocladiaceae	g__vulcanisaeta	s__Vulcanisaeta moutnovskia	GCF_000190315.1	1	0	1	1	1
d__archaea	p__thermoproteota	c__thermoproteia	o__thermoproteales	f__thermocladiaceae	g__vulcanisaeta	s__Vulcanisaeta distributa	GCF_000148385.1	1	1	0	1	1
d__bacteria	p__actinobacteriota	c__actinomycetia	o__streptosporangiales	f__streptosporangiaceae	g__vn6-2	s__VN6-2 sp018437505	GCA_018437505.1	3	3	0	2	1
d__bacteria	p__firmicutes	c__bacilli	o__bacillales_d	f__amphibacillaceae	g__virgibacillus_f	s__Virgibacillus_F phasianinus	GCF_002216775.1	7	7	0	7	3
d__bacteria	p__firmicutes	c__bacilli	o__bacillales_d	f__amphibacillaceae	g__virgibacillus_f	s__Virgibacillus_F necropolis	GCF_002224365.1	7	7	0	7	3
d__bacteria	p__firmicutes	c__bacilli	o__bacillales_d	f__amphibacillaceae	g__virgibacillus	s__Virgibacillus sp000725285	GCF_000725285.1	7	7	0	7	3
d__bacteria	p__firmicutes	c__bacilli	o__bacillales_d	f__amphibacillaceae	g__virgibacillus	s__Virgibacillus pantothenticus	GCF_018075365.1	6	6	0	6	1
d__bacteria	p__proteobacteria	c__gammaproteobacteria	o__enterobacterales	f__vibrionaceae	g__vibrio	s__Vibrio ziniensis	GCF_011064285.1	10	10	0	10	4
d__bacteria	p__proteobacteria	c__gammaproteobacteria	o__enterobacterales	f__vibrionaceae	g__vibrio	s__Vibrio zhugei	GCF_003716875.1	9	9	0	9	2
d__bacteria	p__proteobacteria	c__gammaproteobacteria	o__enterobacterales	f__vibrionaceae	g__vibrio	s__Vibrio vulnificus	GCF_002224265.1	11	11	0	11	3
d__bacteria	p__proteobacteria	c__gammaproteobacteria	o__enterobacterales	f__vibrionaceae	g__vibrio	s__Vibrio tubiashii	GCF_000772105.1	10	10	0	10	3
d__bacteria	p__proteobacteria	c__gammaproteobacteria	o__enterobacterales	f__vibrionaceae	g__vibrio	s__Vibrio tritonius	GCF_001547935.1	11	11	0	11	3
d__bacteria	p__proteobacteria	c__gammaproteobacteria	o__enterobacterales	f__vibrionaceae	g__vibrio	s__Vibrio tapetis	GCF_900233005.1	6	6	0	6	3
d__bacteria	p__proteobacteria	c__gammaproteobacteria	o__enterobacterales	f__vibrionaceae	g__vibrio	s__Vibrio taketomensis	GCF_009938165.1	12	12	0	12	4
d__bacteria	p__proteobacteria	c__gammaproteobacteria	o__enterobacterales	f__vibrionaceae	g__vibrio	s__Vibrio sp903986855	GCF_905175385.1	12	12	0	12	2
d__bacteria	p__proteobacteria	c__gammaproteobacteria	o__enterobacterales	f__vibrionaceae	g__vibrio	s__Vibrio sp011306175	GCF_011306175.1	8	8	0	8	2
d__bacteria	p__proteobacteria	c__gammaproteobacteria	o__enterobacterales	f__vibrionaceae	g__vibrio	s__Vibrio sp009601765	GCF_009601765.2	9	9	0	9	1
d__bacteria	p__proteobacteria	c__gammaproteobacteria	o__enterobacterales	f__vibrionaceae	g__vibrio	s__Vibrio sp004804295	GCF_019226825.1	12	12	0	12	1
d__bacteria	p__proteobacteria	c__gammaproteobacteria	o__enterobacterales	f__vibrionaceae	g__vibrio	s__Vibrio sp000176715	GCF_019048845.1	9	9	0	9	3
d__bacteria	p__proteobacteria	c__gammaproteobacteria	o__enterobacterales	f__vibrionaceae	g__vibrio	s__Vibrio rumoiensis	GCF_002218045.2	8	8	0	8	1
d__bacteria	p__proteobacteria	c__gammaproteobacteria	o__enterobacterales	f__vibrionaceae	g__vibrio	s__Vibrio ponticus	GCF_009938225.1	6	6	0	6	3
d__bacteria	p__proteobacteria	c__gammaproteobacteria	o__enterobacterales	f__vibrionaceae	g__vibrio	s__Vibrio panuliri	GCF_009938205.1	11	11	0	11	3
d__bacteria	p__proteobacteria	c__gammaproteobacteria	o__enterobacterales	f__vibrionaceae	g__vibrio	s__Vibrio metoecus_B	GCF_009665255.1	10	10	0	10	3
d__bacteria	p__proteobacteria	c__gammaproteobacteria	o__enterobacterales	f__vibrionaceae	g__vibrio	s__Vibrio hyugaensis	GCF_002906655.1	12	12	0	12	3
d__bacteria	p__proteobacteria	c__gammaproteobacteria	o__enterobacterales	f__vibrionaceae	g__vibrio	s__Vibrio gazogenes_A	GCF_002196515.1	8	8	0	8	1
d__bacteria	p__proteobacteria	c__gammaproteobacteria	o__enterobacterales	f__vibrionaceae	g__vibrio	s__Vibrio cyclitrophicus	GCF_005144905.1	14	14	0	14	2
d__bacteria	p__proteobacteria	c__gammaproteobacteria	o__enterobacterales	f__vibrionaceae	g__vibrio	s__Vibrio cidicii	GCF_009763805.1	11	11	0	11	3
d__bacteria	p__proteobacteria	c__gammaproteobacteria	o__enterobacterales	f__vibrionaceae	g__vibrio	s__Vibrio casei	GCF_002218025.2	8	8	0	8	2
d__bacteria	p__proteobacteria	c__gammaproteobacteria	o__enterobacterales	f__vibrionaceae	g__vibrio	s__Vibrio campbellii	GCF_002163755.1	11	11	0	11	3
d__bacteria	p__proteobacteria	c__gammaproteobacteria	o__enterobacterales	f__vibrionaceae	g__vibrio	s__Vibrio breoganii	GCF_001677275.1	9	9	0	9	2
d__bacteria	p__proteobacteria	c__gammaproteobacteria	o__enterobacterales	f__vibrionaceae	g__vibrio	s__Vibrio bathopelagicus	GCF_014879975.1	15	15	0	15	2
d__bacteria	p__proteobacteria	c__gammaproteobacteria	o__enterobacterales	f__vibrionaceae	g__vibrio	s__Vibrio astriarenae	GCF_010587385.1	11	11	0	11	4
d__bacteria	p__proteobacteria	c__gammaproteobacteria	o__enterobacterales	f__vibrionaceae	g__vibrio	s__Vibrio aquimaris	GCF_009363415.1	9	9	0	9	2
d__bacteria	p__proteobacteria	c__gammaproteobacteria	o__enterobacterales	f__vibrionaceae	g__vibrio	s__Vibrio aphrogenes	GCF_002157735.2	7	7	0	7	1
d__bacteria	p__proteobacteria	c__gammaproteobacteria	o__enterobacterales	f__vibrionaceae	g__vibrio	s__Vibrio alginolyticus	GCF_000354175.2	11	11	0	11	4
d__bacteria	p__proteobacteria	c__gammaproteobacteria	o__enterobacterales	f__vibrionaceae	g__vibrio	s__Vibrio alfacsensis	GCF_003544875.1	11	11	0	11	3
d__bacteria	p__proteobacteria	c__gammaproteobacteria	o__ps1	f__thioglobaceae	g__vesicomyosocius	s__Vesicomyosocius sp014706615	GCF_014706615.1	1	1	0	1	1
d__bacteria	p__proteobacteria	c__gammaproteobacteria	o__ps1	f__thioglobaceae	g__vesicomyosocius	s__Vesicomyosocius okutanii	GCF_000010405.1	1	1	0	1	1
d__bacteria	p__firmicutes_c	c__negativicutes	o__veillonellales	f__veillonellaceae	g__veillonella	s__Veillonella rodentium	GCF_900187285.1	4	4	0	4	1
d__bacteria	p__firmicutes_c	c__negativicutes	o__veillonellales	f__veillonellaceae	g__veillonella	s__Veillonella parvula_A	GCF_902810435.1	4	4	0	4	2
d__bacteria	p__firmicutes_c	c__negativicutes	o__veillonellales	f__veillonellaceae	g__veillonella	s__Veillonella parvula	GCF_000024945.1	4	4	0	4	2
d__bacteria	p__firmicutes_c	c__negativicutes	o__veillonellales	f__veillonellaceae	g__veillonella	s__Veillonella nakazawae	GCF_013393365.1	4	4	0	4	3
d__bacteria	p__firmicutes_c	c__negativicutes	o__veillonellales	f__veillonellaceae	g__veillonella	s__Veillonella dispar	GCF_900637515.1	4	4	0	4	2
d__bacteria	p__proteobacteria	c__gammaproteobacteria	o__burkholderiales	f__burkholderiaceae	g__variovorax	s__Variovorax sp901827205	GCF_901827205.1	2	2	0	2	1
d__bacteria	p__proteobacteria	c__gammaproteobacteria	o__burkholderiales	f__burkholderiaceae	g__variovorax	s__Variovorax sp901827185	GCF_901827185.1	2	2	0	2	1
d__bacteria	p__proteobacteria	c__gammaproteobacteria	o__burkholderiales	f__burkholderiaceae	g__variovorax	s__Variovorax sp901827175	GCF_901827175.1	2	2	0	2	1
d__bacteria	p__proteobacteria	c__gammaproteobacteria	o__burkholderiales	f__burkholderiaceae	g__variovorax	s__Variovorax sp901827155	GCF_901827155.1	2	2	0	2	1
d__bacteria	p__proteobacteria	c__gammaproteobacteria	o__burkholderiales	f__burkholderiaceae	g__variovorax	s__Variovorax sp017161115	GCF_017161115.1	2	2	0	2	1
d__bacteria	p__proteobacteria	c__gammaproteobacteria	o__burkholderiales	f__burkholderiaceae	g__variovorax	s__Variovorax sp014303735	GCF_014303735.1	2	2	0	2	1
d__bacteria	p__proteobacteria	c__gammaproteobacteria	o__burkholderiales	f__burkholderiaceae	g__variovorax	s__Variovorax sp014302995	GCF_014302995.1	2	2	0	2	1
d__bacteria	p__proteobacteria	c__gammaproteobacteria	o__burkholderiales	f__burkholderiaceae	g__variovorax	s__Variovorax sp003019815	GCF_003019815.1	3	3	0	3	1
d__bacteria	p__proteobacteria	c__gammaproteobacteria	o__burkholderiales	f__burkholderiaceae	g__variovorax	s__Variovorax sp001577265	GCF_001577265.1	2	2	0	2	1
d__bacteria	p__proteobacteria	c__gammaproteobacteria	o__burkholderiales	f__burkholderiaceae	g__variovorax	s__Variovorax paradoxus_H	GCF_009498455.1	2	2	0	2	1
d__bacteria	p__proteobacteria	c__gammaproteobacteria	o__burkholderiales	f__burkholderiaceae	g__variovorax	s__Variovorax paradoxus_G	GCF_009755665.1	2	2	0	2	1
d__bacteria	p__proteobacteria	c__gammaproteobacteria	o__burkholderiales	f__burkholderiaceae	g__variovorax	s__Variovorax paradoxus_E	GCF_000463015.1	2	2	0	2	1
d__bacteria	p__proteobacteria	c__gammaproteobacteria	o__burkholderiales	f__burkholderiaceae	g__variovorax	s__Variovorax paradoxus_C	GCF_000184745.1	2	2	0	2	1
d__bacteria	p__proteobacteria	c__alphaproteobacteria	o__rhizobiales	f__xanthobacteraceae	g__variibacter	s__Variibacter gotjawalensis	GCF_002355335.1	1	1	0	1	1
d__bacteria	p__proteobacteria	c__alphaproteobacteria	o__rhodobacterales	f__rhodobacteraceae	g__vannielia	s__Vannielia sp006351965	GCF_006351965.1	1	1	0	1	1
d__bacteria	p__omnitrophota	c__koll11	o__uba1572		g__vampirococcus_b	s__Vampirococcus_B archaeovorus	GCF_004102945.1	1	1	0	0	0
d__bacteria	p__firmicutes_a	c__clostridia	o__lachnospirales	f__vallitaleaceae	g__vallitalea	s__Vallitalea pronyensis	GCF_018141445.1	5	5	0	5	1
d__bacteria	p__firmicutes_a	c__clostridia	o__lachnospirales	f__vallitaleaceae	g__vallitalea	s__Vallitalea guaymasensis	GCF_018141425.1	5	5	0	5	1
d__bacteria	p__firmicutes	c__bacilli	o__lactobacillales	f__vagococcaceae	g__vagococcus_d	s__Vagococcus_D coleopterorum	GCF_011303955.1	5	5	0	5	4
d__bacteria	p__firmicutes	c__bacilli	o__lactobacillales	f__vagococcaceae	g__vagococcus_a	s__Vagococcus_A zengguangii	GCF_005145005.1	7	7	0	7	5
d__bacteria	p__firmicutes	c__bacilli	o__lactobacillales	f__vagococcaceae	g__vagococcus_a	s__Vagococcus_A sp004792515	GCF_004792515.1	7	7	0	7	5
d__bacteria	p__firmicutes	c__bacilli	o__lactobacillales	f__vagococcaceae	g__vagococcus	s__Vagococcus teuberi	GCF_001870205.1	6	6	0	6	5
d__bacteria	p__firmicutes	c__bacilli	o__lactobacillales	f__vagococcaceae	g__vagococcus	s__Vagococcus penaei	GCF_001998885.1	5	5	0	5	4
d__bacteria	p__firmicutes	c__bacilli	o__lactobacillales	f__vagococcaceae	g__vagococcus	s__Vagococcus hydrophili	GCF_011304195.1	8	8	0	8	6
d__bacteria	p__firmicutes	c__bacilli	o__lactobacillales	f__vagococcaceae	g__vagococcus	s__Vagococcus carniphilus	GCF_014397115.1	6	6	0	6	6
d__bacteria	p__myxococcota	c__bradymonadia	o__bradymonadales	f__bradymonadaceae	g__v1718	s__V1718 sp007993755	GCA_007993755.1	3	3	0	0	0
d__bacteria	p__proteobacteria	c__gammaproteobacteria	o__burkholderiales	f__usitatibacteraceae	g__usitatibacter	s__Usitatibacter rugosus	GCF_013003965.1	2	2	0	2	1
d__bacteria	p__proteobacteria	c__gammaproteobacteria	o__burkholderiales	f__usitatibacteraceae	g__usitatibacter	s__Usitatibacter palustris	GCF_013003985.1	2	2	0	2	1
d__bacteria	p__firmicutes	c__bacilli	o__bacillales_a	f__planococcaceae	g__ureibacillus	s__Ureibacillus sp005491425	GCF_005491425.1	13	13	0	13	3
d__bacteria	p__bacteroidota	c__bacteroidia	o__flavobacteriales	f__flavobacteriaceae	g__urechidicola	s__Urechidicola croceus	GCF_001761325.1	2	2	0	2	1
d__bacteria	p__firmicutes	c__bacilli	o__mycoplasmatales	f__mycoplasmoidaceae	g__ureaplasma	s__Ureaplasma parvum	GCF_000019345.1	2	2	0	2	1
d__bacteria	p__planctomycetota	c__planctomycetia	o__gemmatales	f__gemmataceae	g__urbifossiella	s__Urbifossiella limnaea	GCF_007747215.1	2	2	0	2	1
d__bacteria	p__proteobacteria	c__gammaproteobacteria	o__burkholderiales	f__burkholderiaceae	g__undibacterium	s__Undibacterium sp009937975	GCF_009937975.1	4	4	0	4	1
d__bacteria	p__proteobacteria	c__gammaproteobacteria	o__burkholderiales	f__burkholderiaceae	g__undibacterium	s__Undibacterium sp009937955	GCF_009937955.1	4	4	0	4	1
d__bacteria	p__proteobacteria	c__gammaproteobacteria	o__burkholderiales	f__burkholderiaceae	g__undibacterium	s__Undibacterium parvum	GCF_003955735.1	6	6	0	6	1
d__bacteria	p__actinobacteriota	c__actinomycetia	o__actinomycetales	f__actinomycetaceae	g__umgs822	s__UMGS822 sp015240065	GCF_015240065.1	3	3	0	3	1
d__bacteria	p__actinobacteriota	c__coriobacteriia	o__coriobacteriales	f__atopobiaceae	g__uba7748	s__UBA7748 sp003862175	GCF_018128285.1	3	3	0	3	1
d__bacteria	p__proteobacteria	c__gammaproteobacteria	o__enterobacterales	f__enterobacteriaceae	g__uba7405	s__UBA7405 sp000755535	GCF_017348915.1	7	7	0	7	2
d__archaea	p__methanobacteriota	c__methanobacteria	o__methanobacteriales	f__methanobacteriaceae	g__uba588	s__UBA588 sp002509085	GCF_018141185.1	2	2	0	2	2
d__bacteria	p__verrucomicrobiota	c__kiritimatiellae	o__kiritimatiellales	f__pontiellaceae	g__uba5540	s__UBA5540 sp009905215	GCA_009905215.1	2	2	0	0	0
d__bacteria	p__acidobacteriota	c__acidobacteriae	o__acidobacteriales	f__acidobacteriaceae	g__uba5172	s__UBA5172 sp014083945	GCF_014083945.1	1	1	0	1	1
d__bacteria	p__firmicutes_a	c__clostridia	o__clostridiales	f__clostridiaceae	g__uba3947	s__UBA3947 sp006351925	GCF_006351925.1	11	11	0	11	2
d__bacteria	p__proteobacteria	c__gammaproteobacteria	o__pseudomonadales	f__dsm-6294	g__uba2009	s__UBA2009 sp016132445	GCA_016132445.1	3	3	0	3	1
d__bacteria	p__proteobacteria	c__alphaproteobacteria	o__sphingomonadales	f__sphingomonadaceae	g__uba1936	s__UBA1936 sp003660165	GCF_003660165.1	2	2	0	2	1
d__bacteria	p__firmicutes_a	c__clostridia	o__tissierellales	f__sedimentibacteraceae	g__uba1535	s__UBA1535 sp017352195	GCF_017352195.1	10	9	1	10	1
d__bacteria	p__proteobacteria	c__gammaproteobacteria	o__burkholderiales	f__uba11063		s__UBA11063 sp002892535	GCA_002892535.1	4	4	0	4	1
d__bacteria	p__planctomycetota	c__planctomycetia	o__gemmatales	f__gemmataceae	g__tuwongella	s__Tuwongella immobilis	GCF_901538355.1	4	4	0	4	1
d__bacteria	p__firmicutes	c__bacilli	o__haloplasmatales_a	f__turicibacteraceae	g__turicibacter	s__Turicibacter sp001543345	GCF_001543345.1	11	11	0	11	6
d__bacteria	p__firmicutes	c__bacilli	o__haloplasmatales_a	f__turicibacteraceae	g__turicibacter	s__Turicibacter sanguinis	GCF_013046825.1	7	7	0	7	4
d__bacteria	p__firmicutes	c__bacilli	o__tumebacillales	f__tumebacillaceae	g__tumebacillus_a	s__Tumebacillus_A avium	GCF_002162355.1	39	39	0	39	7
d__bacteria	p__firmicutes	c__bacilli	o__tumebacillales	f__tumebacillaceae	g__tumebacillus_a	s__Tumebacillus_A algifaecis	GCF_002243515.1	27	27	0	27	3
d__bacteria	p__firmicutes	c__bacilli	o__mycoplasmatales	f__mycoplasmataceae	g__tullyiplasma	s__Tullyiplasma syrphidae	GCF_002843565.1	2	2	0	2	1
d__bacteria	p__proteobacteria	c__alphaproteobacteria	o__sphingomonadales	f__sphingomonadaceae	g__tsuneonella	s__Tsuneonella mangrovi	GCF_002269345.1	1	1	0	1	1
d__bacteria	p__proteobacteria	c__alphaproteobacteria	o__sphingomonadales	f__sphingomonadaceae	g__tsuneonella	s__Tsuneonella dongtanensis	GCF_001698205.1	1	1	0	1	1
d__bacteria	p__actinobacteriota	c__actinomycetia	o__mycobacteriales	f__mycobacteriaceae	g__tsukamurella	s__Tsukamurella paurometabola_A	GCF_900631615.1	2	2	0	2	1
d__bacteria	p__actinobacteriota	c__actinomycetia	o__mycobacteriales	f__mycobacteriaceae	g__tsukamurella	s__Tsukamurella paurometabola	GCF_000092225.1	2	2	0	2	1
d__bacteria	p__actinobacteriota	c__actinomycetia	o__actinomycetales	f__actinomycetaceae	g__trueperella	s__Trueperella pecoris	GCF_014926385.1	4	4	0	4	1
d__bacteria	p__actinobacteriota	c__actinomycetia	o__actinomycetales	f__actinomycetaceae	g__trueperella	s__Trueperella bialowiezensis	GCF_900637955.1	2	2	0	2	1
d__bacteria	p__deinococcota	c__deinococci	o__deinococcales	f__trueperaceae	g__truepera	s__Truepera radiovictrix	GCF_000092425.1	2	2	0	2	1
d__bacteria	p__actinobacteriota	c__actinomycetia	o__actinomycetales	f__microbacteriaceae	g__tropheryma	s__Tropheryma whipplei	GCF_000007485.1	1	1	0	1	1
d__bacteria	p__proteobacteria	c__gammaproteobacteria	o__burkholderiales	f__burkholderiaceae	g__trinickia	s__Trinickia sp005280735	GCF_005280735.1	4	4	0	4	1
d__bacteria	p__cyanobacteria	c__cyanobacteriia	o__cyanobacteriales	f__nostocaceae	g__trichormus_b	s__Trichormus_B azollae	GCF_000196515.1	4	4	0	4	1
d__bacteria	p__cyanobacteria	c__cyanobacteriia	o__cyanobacteriales	f__nostocaceae	g__trichormus	s__Trichormus variabilis	GCF_009856605.1	4	4	0	4	2
d__bacteria	p__cyanobacteria	c__cyanobacteriia	o__cyanobacteriales	f__nostocaceae	g__trichormus	s__Trichormus sp013393945	GCF_013393945.1	4	4	0	4	1
d__bacteria	p__cyanobacteria	c__cyanobacteriia	o__cyanobacteriales	f__nostocaceae	g__trichormus	s__Trichormus sp002896875	GCF_002896875.1	5	5	0	5	1
d__bacteria	p__cyanobacteria	c__cyanobacteriia	o__cyanobacteriales	f__nostocaceae	g__trichormus	s__Trichormus sp001548375	GCF_001548375.1	4	4	0	4	1
d__bacteria	p__cyanobacteria	c__cyanobacteriia	o__cyanobacteriales	f__nostocaceae	g__trichormus	s__Trichormus sp000316645	GCF_000316645.1	5	5	0	5	2
d__bacteria	p__cyanobacteria	c__cyanobacteriia	o__cyanobacteriales	f__nostocaceae	g__trichormus	s__Trichormus sp000009705	GCF_000009705.1	3	3	0	3	2
d__bacteria	p__desulfobacterota	c__desulfuromonadia	o__geobacterales	f__pseudopelobacteraceae	g__trichlorobacter	s__Trichlorobacter lovleyi	GCF_000020385.1	2	2	0	2	1
d__bacteria	p__spirochaetota	c__spirochaetia	o__treponematales	f__termitinemataceae	g__treponema_h	s__Treponema_H azotonutricium	GCF_000214355.1	2	2	0	2	1
d__bacteria	p__spirochaetota	c__spirochaetia	o__treponematales	f__termitinemataceae	g__treponema_g	s__Treponema_G caldarium	GCF_000219725.1	3	2	1	3	2
d__bacteria	p__spirochaetota	c__spirochaetia	o__treponematales	f__treponemataceae	g__treponema_f	s__Treponema_F brennaborense	GCF_000212415.1	4	4	0	4	1
d__bacteria	p__spirochaetota	c__spirochaetia	o__treponematales	f__treponemataceae	g__treponema_d	s__Treponema_D succinifaciens	GCF_000195275.1	4	4	0	4	1
d__bacteria	p__spirochaetota	c__spirochaetia	o__treponematales	f__treponemataceae	g__treponema_d	s__Treponema_D sp900541995	GCF_016117655.1	4	3	1	4	2
d__bacteria	p__spirochaetota	c__spirochaetia	o__treponematales	f__treponemataceae	g__treponema_d	s__Treponema_D parvum_A	GCF_017893945.1	2	0	2	2	1
d__bacteria	p__spirochaetota	c__spirochaetia	o__treponematales	f__treponemataceae	g__treponema_d	s__Treponema_D parvum	GCF_017893965.1	2	0	2	2	1
d__bacteria	p__spirochaetota	c__spirochaetia	o__treponematales	f__treponemataceae	g__treponema_d	s__Treponema_D buccale	GCF_902983995.1	3	3	0	3	2
d__bacteria	p__spirochaetota	c__spirochaetia	o__treponematales	f__treponemataceae	g__treponema_b	s__Treponema_B putidum	GCF_000755145.1	2	2	0	2	1
d__bacteria	p__spirochaetota	c__spirochaetia	o__treponematales	f__treponemataceae	g__treponema_b	s__Treponema_B pedis	GCF_017161325.1	2	2	0	2	1
d__bacteria	p__spirochaetota	c__spirochaetia	o__treponematales	f__treponemataceae	g__treponema_b	s__Treponema_B denticola	GCF_000008185.1	2	2	0	2	1
d__bacteria	p__spirochaetota	c__spirochaetia	o__treponematales	f__treponemataceae	g__treponema	s__Treponema sp018336815	GCF_018336815.1	2	2	0	2	2
d__bacteria	p__spirochaetota	c__spirochaetia	o__treponematales	f__treponemataceae	g__treponema	s__Treponema sp010365865	GCF_010365865.1	2	2	0	2	2
d__bacteria	p__spirochaetota	c__spirochaetia	o__treponematales	f__treponemataceae	g__treponema	s__Treponema sp000775995	GCF_000775995.1	2	2	0	2	1
d__bacteria	p__spirochaetota	c__spirochaetia	o__treponematales	f__treponemataceae	g__treponema	s__Treponema phagedenis	GCF_008153345.1	2	2	0	2	1
d__bacteria	p__spirochaetota	c__spirochaetia	o__treponematales	f__treponemataceae	g__treponema	s__Treponema medium	GCF_017161265.1	2	2	0	2	1
d__bacteria	p__actinobacteriota	c__actinomycetia	o__mycobacteriales	f__mycobacteriaceae	g__tomitella	s__Tomitella sp014126825	GCF_014126825.1	4	4	0	4	1
d__bacteria	p__actinobacteriota	c__actinomycetia	o__mycobacteriales	f__mycobacteriaceae	g__tomitella	s__Tomitella sp007559025	GCF_007559025.1	4	4	0	4	1
d__bacteria	p__proteobacteria	c__gammaproteobacteria	o__enterobacterales	f__aeromonadaceae	g__tolumonas	s__Tolumonas auensis	GCF_000023065.1	8	8	0	8	1
d__bacteria	p__proteobacteria	c__alphaproteobacteria	o__tistrellales	f__tistrellaceae	g__tistrella	s__Tistrella mobilis	GCF_000264455.2	4	4	0	4	1
d__bacteria	p__proteobacteria	c__gammaproteobacteria	o__thiotrichales	f__thiotrichaceae	g__thiothrix	s__Thiothrix unzii	GCF_017901175.1	1	1	0	1	1
d__bacteria	p__proteobacteria	c__gammaproteobacteria	o__thiotrichales	f__thiotrichaceae	g__thiothrix	s__Thiothrix sp017901155	GCF_017901155.1	2	2	0	2	1
d__bacteria	p__proteobacteria	c__gammaproteobacteria	o__thiotrichales	f__thiotrichaceae	g__thiothrix	s__Thiothrix sp017901135	GCF_017901135.1	3	3	0	3	1
d__bacteria	p__proteobacteria	c__gammaproteobacteria	o__thiotrichales	f__thiotrichaceae	g__thiothrix	s__Thiothrix sp016772315	GCF_016772315.1	4	4	0	4	1
d__bacteria	p__proteobacteria	c__gammaproteobacteria	o__thiomicrospirales	f__thiomicrospiraceae	g__thiosulfativibrio	s__Thiosulfativibrio zosterae	GCF_011398155.1	3	3	0	3	1
d__bacteria	p__spirochaetota	c__spirochaetia	o__spirochaetales_e	f__dsm-19205	g__thiospirochaeta	s__Thiospirochaeta perfilievii	GCF_008329945.1	7	4	3	7	2
d__bacteria	p__proteobacteria	c__gammaproteobacteria	o__burkholderiales	f__burkholderiaceae	g__thiomonas	s__Thiomonas intermedia	GCF_002028405.1	1	1	0	1	1
d__bacteria	p__proteobacteria	c__gammaproteobacteria	o__thiomicrospirales	f__thiomicrospiraceae	g__thiomicrospira	s__Thiomicrospira cyclica	GCF_000214825.1	2	2	0	2	1
d__bacteria	p__proteobacteria	c__gammaproteobacteria	o__thiomicrospirales	f__thiomicrospiraceae	g__thiomicrospira	s__Thiomicrospira aerophila	GCF_000227665.2	2	2	0	2	1
d__bacteria	p__proteobacteria	c__gammaproteobacteria	o__thiomicrospirales	f__thiomicrospiraceae	g__thiomicrorhabdus	s__Thiomicrorhabdus xiamenensis	GCF_013282625.1	3	3	0	3	1
d__bacteria	p__proteobacteria	c__gammaproteobacteria	o__thiomicrospirales	f__thiomicrospiraceae	g__thiomicrorhabdus	s__Thiomicrorhabdus sp011398355	GCF_011398355.1	4	4	0	4	4
d__bacteria	p__proteobacteria	c__gammaproteobacteria	o__thiomicrospirales	f__thiomicrospiraceae	g__thiomicrorhabdus	s__Thiomicrorhabdus sediminis	GCF_005885815.1	3	3	0	3	1
d__bacteria	p__proteobacteria	c__gammaproteobacteria	o__thiomicrospirales	f__thiomicrospiraceae	g__thiomicrorhabdus	s__Thiomicrorhabdus indica	GCF_004293625.1	3	3	0	3	3
d__bacteria	p__proteobacteria	c__gammaproteobacteria	o__thiomicrospirales	f__thiomicrospiraceae	g__thiomicrorhabdus	s__Thiomicrorhabdus aquaedulcis	GCF_004001325.1	3	3	0	3	1
d__bacteria	p__proteobacteria	c__gammaproteobacteria	o__chromatiales	f__sedimenticolaceae	g__thiolapillus	s__Thiolapillus brandeum	GCF_000828615.1	1	1	0	1	1
d__bacteria	p__proteobacteria	c__gammaproteobacteria	o__thiohalobacterales	f__thiohalobacteraceae	g__thiohalobacter	s__Thiohalobacter thiocyanaticus_A	GCF_002356355.1	1	1	0	1	1
d__bacteria	p__proteobacteria	c__gammaproteobacteria	o__ps1	f__thioglobaceae	g__thioglobus	s__Thioglobus autotrophicus	GCF_001293165.1	1	1	0	1	1
d__bacteria	p__proteobacteria	c__gammaproteobacteria	o__chromatiales	f__chromatiaceae	g__thioflavicoccus	s__Thioflavicoccus mobilis	GCF_000327045.1	2	2	0	2	1
d__bacteria	p__proteobacteria	c__gammaproteobacteria	o__ps1	f__thioglobaceae	g__thiodubiliella	s__Thiodubiliella sp001875585	GCF_003711265.1	1	1	0	1	1
d__bacteria	p__proteobacteria	c__gammaproteobacteria	o__ps1	f__thioglobaceae	g__thiodubiliella	s__Thiodubiliella sp001547755	GCF_001547755.1	1	1	0	1	1
d__bacteria	p__proteobacteria	c__gammaproteobacteria	o__chromatiales	f__chromatiaceae	g__thiodictyon	s__Thiodictyon syntrophicum	GCF_002813775.1	2	2	0	2	1
d__bacteria	p__proteobacteria	c__alphaproteobacteria	o__rhodobacterales	f__rhodobacteraceae	g__thioclava	s__Thioclava nitratireducens	GCF_001940525.2	3	3	0	3	1
d__bacteria	p__proteobacteria	c__alphaproteobacteria	o__rhodobacterales	f__rhodobacteraceae	g__thioclava	s__Thioclava electrotropha	GCF_002085925.2	3	3	0	3	1
d__bacteria	p__proteobacteria	c__gammaproteobacteria	o__burkholderiales	f__thiobacillaceae	g__thiobacillus	s__Thiobacillus denitrificans_B	GCF_000012745.1	2	2	0	2	1
d__bacteria	p__proteobacteria	c__gammaproteobacteria	o__ectothiorhodospirales	f__thioalkalivibrionaceae	g__thioalkalivibrio_b	s__Thioalkalivibrio_B paradoxus	GCF_000227685.2	1	1	0	1	1
d__bacteria	p__proteobacteria	c__gammaproteobacteria	o__ectothiorhodospirales	f__thioalkalivibrionaceae	g__thioalkalivibrio_b	s__Thioalkalivibrio_B nitratireducens	GCF_000321415.2	1	1	0	1	1
d__bacteria	p__proteobacteria	c__gammaproteobacteria	o__ectothiorhodospirales	f__ectothiorhodospiraceae	g__thioalkalivibrio_a	s__Thioalkalivibrio_A sulfidiphilus	GCF_000021985.1	1	1	0	1	1
d__bacteria	p__proteobacteria	c__gammaproteobacteria	o__ectothiorhodospirales	f__thioalkalivibrionaceae	g__thioalkalivibrio	s__Thioalkalivibrio sp000025545	GCF_000025545.1	1	1	0	1	1
d__bacteria	p__deinococcota	c__deinococci	o__deinococcales	f__thermaceae	g__thermus	s__Thermus thermophilus	GCF_000091545.1	2	2	0	2	1
d__bacteria	p__deinococcota	c__deinococci	o__deinococcales	f__thermaceae	g__thermus	s__Thermus sp000236585	GCF_000236585.1	2	2	0	2	1
d__bacteria	p__deinococcota	c__deinococci	o__deinococcales	f__thermaceae	g__thermus	s__Thermus parvatiensis	GCF_001535545.1	2	2	0	2	1
d__bacteria	p__deinococcota	c__deinococci	o__deinococcales	f__thermaceae	g__thermus	s__Thermus caldilimi	GCF_004684245.1	2	2	0	2	1
d__bacteria	p__deinococcota	c__deinococci	o__deinococcales	f__thermaceae	g__thermus	s__Thermus brockianus	GCF_001880325.1	2	2	0	2	1
d__bacteria	p__synergistota	c__synergistia	o__synergistales	f__thermovirgaceae	g__thermovirga	s__Thermovirga lienii	GCF_000233775.1	3	3	0	0	0
d__bacteria	p__aquificota	c__desulfurobacteriia	o__desulfurobacteriales	f__desulfurobacteriaceae	g__thermovibrio	s__Thermovibrio ammonificans	GCF_000185805.1	3	3	0	0	0
d__bacteria	p__thermotogota	c__thermotogae	o__thermotogales	f__thermotogaceae	g__thermotoga	s__Thermotoga petrophila	GCF_000016785.1	1	1	0	1	1
d__bacteria	p__thermotogota	c__thermotogae	o__thermotogales	f__thermotogaceae	g__thermotoga	s__Thermotoga neapolitana	GCF_000018945.1	1	1	0	1	1
d__bacteria	p__thermotogota	c__thermotogae	o__thermotogales	f__thermotogaceae	g__thermotoga	s__Thermotoga maritima	GCF_000008545.1	1	1	0	1	1
d__bacteria	p__cyanobacteria	c__cyanobacteriia	o__thermosynechococcales	f__thermosynechococcaceae	g__thermosynechococcus	s__Thermosynechococcus sp008386235	GCF_008386235.1	1	1	0	1	1
d__bacteria	p__cyanobacteria	c__cyanobacteriia	o__thermosynechococcales	f__thermosynechococcaceae	g__thermosynechococcus	s__Thermosynechococcus elongatus_B	GCF_003555505.1	1	1	0	1	1
d__bacteria	p__cyanobacteria	c__cyanobacteriia	o__thermosynechococcales	f__thermosynechococcaceae	g__thermosynechococcus	s__Thermosynechococcus elongatus_A	GCF_000011345.1	1	1	0	1	1
d__bacteria	p__desulfobacterota	c__thermodesulfobacteria	o__thermodesulfobacteriales	f__st65	g__thermosulfuriphilus	s__Thermosulfuriphilus ammonigenes	GCF_011207455.1	1	1	0	1	1
d__bacteria	p__desulfobacterota	c__thermodesulfobacteria	o__thermodesulfobacteriales	f__thermodesulfobacteriaceae	g__thermosulfurimonas_a	s__Thermosulfurimonas_A marina	GCF_012317585.1	1	1	0	1	1
d__bacteria	p__thermosulfidibacterota	c__thermosulfidibacteria	o__thermosulfidibacterales	f__thermosulfidibacteraceae	g__thermosulfidibacter	s__Thermosulfidibacter takaii	GCF_001547735.1	1	1	0	0	0
d__archaea	p__thermoproteota	c__thermoproteia	o__sulfolobales	f__desulfurococcaceae	g__thermosphaera	s__Thermosphaera aggregans	GCF_000092185.1	1	1	0	1	1
d__bacteria	p__thermotogota	c__thermotogae	o__thermotogales	f__fervidobacteriaceae	g__thermosipho	s__Thermosipho melanesiensis	GCF_000016905.1	4	4	0	4	1
d__bacteria	p__firmicutes_a	c__thermosediminibacteria	o__thermosediminibacterales	f__thermosediminibacteraceae	g__thermosediminibacter	s__Thermosediminibacter oceani	GCF_000144645.1	3	3	0	0	0
d__archaea	p__thermoproteota	c__thermoproteia	o__thermoproteales	f__thermoproteaceae	g__thermoproteus	s__Thermoproteus uzoniensis	GCF_000193375.1	1	1	0	1	1
d__archaea	p__thermoproteota	c__thermoproteia	o__thermoproteales	f__thermoproteaceae	g__thermoproteus	s__Thermoproteus tenax	GCF_000253055.1	1	1	0	1	1
d__archaea	p__thermoplasmatota	c__thermoplasmata	o__thermoplasmatales	f__thermoplasmataceae	g__thermoplasma	s__Thermoplasma volcanium	GCF_000011185.1	1	1	0	1	1
d__archaea	p__thermoplasmatota	c__thermoplasmata	o__thermoplasmatales	f__thermoplasmataceae	g__thermoplasma	s__Thermoplasma acidophilum	GCF_000195915.1	1	1	0	1	1
d__bacteria	p__actinobacteriota	c__coriobacteriia	o__coriobacteriales	f__atopobiaceae	g__thermophilibacter	s__Thermophilibacter timonensis	GCF_900119915.1	2	2	0	2	1
d__bacteria	p__actinobacteriota	c__coriobacteriia	o__coriobacteriales	f__atopobiaceae	g__thermophilibacter	s__Thermophilibacter sp002407785	GCF_015277515.1	2	2	0	2	1
d__bacteria	p__actinobacteriota	c__actinomycetia	o__streptosporangiales	f__streptosporangiaceae	g__thermomonospora	s__Thermomonospora curvata	GCF_000024385.1	4	4	0	4	1
d__bacteria	p__actinobacteriota	c__actinomycetia	o__streptosporangiales	f__streptosporangiaceae	g__thermomonospora	s__Thermomonospora amylolytica	GCF_003589885.1	4	4	0	4	1
d__bacteria	p__proteobacteria	c__gammaproteobacteria	o__xanthomonadales	f__xanthomonadaceae	g__thermomonas	s__Thermomonas sp014678725	GCF_014678725.1	2	2	0	2	1
d__bacteria	p__proteobacteria	c__gammaproteobacteria	o__xanthomonadales	f__xanthomonadaceae	g__thermomonas	s__Thermomonas sp011302915	GCF_011302915.1	2	2	0	2	1
d__bacteria	p__proteobacteria	c__gammaproteobacteria	o__xanthomonadales	f__xanthomonadaceae	g__thermomonas	s__Thermomonas sp006337105	GCF_006337105.1	2	2	0	2	1
d__bacteria	p__proteobacteria	c__gammaproteobacteria	o__xanthomonadales	f__xanthomonadaceae	g__thermomonas	s__Thermomonas carbonis	GCF_014396975.1	2	2	0	2	1
d__bacteria	p__proteobacteria	c__gammaproteobacteria	o__xanthomonadales	f__xanthomonadaceae	g__thermomonas	s__Thermomonas brevis	GCF_014395425.1	2	2	0	2	1
d__bacteria	p__chloroflexota	c__chloroflexia	o__thermomicrobiales	f__thermomicrobiaceae	g__thermomicrobium	s__Thermomicrobium roseum	GCF_000021685.1	2	2	0	2	2
d__bacteria	p__planctomycetota	c__planctomycetia	o__pirellulales	f__thermoguttaceae	g__thermogutta	s__Thermogutta terrifontis	GCF_002277955.1	1	1	0	1	1
d__archaea	p__thermoproteota	c__thermoproteia	o__sulfolobales	f__desulfurococcaceae	g__thermogladius	s__Thermogladius calderae	GCF_000264495.1	1	1	0	1	1
d__archaea	p__thermoproteota	c__thermoproteia	o__thermofilales	f__thermofilaceae	g__thermofilum_b	s__Thermofilum_B pendens_A	GCF_000015225.1	1	1	0	1	1
d__archaea	p__thermoproteota	c__thermoproteia	o__thermofilales	f__thermofilaceae	g__thermofilum_b	s__Thermofilum_B adornatum	GCF_000446015.1	1	1	0	1	1
d__bacteria	p__nitrospirota	c__thermodesulfovibrionia	o__thermodesulfovibrionales	f__thermodesulfovibrionaceae	g__thermodesulfovibrio	s__Thermodesulfovibrio yellowstonii	GCF_000020985.1	1	0	1	0	0
d__bacteria	p__thermodesulfobiota	c__thermodesulfobiia	o__thermodesulfobiales	f__thermodesulfobiaceae	g__thermodesulfobium	s__Thermodesulfobium narugense	GCF_000212395.1	2	2	0	0	0
d__bacteria	p__thermodesulfobiota	c__thermodesulfobiia	o__thermodesulfobiales	f__thermodesulfobiaceae	g__thermodesulfobium	s__Thermodesulfobium acidiphilum	GCF_003057965.1	2	2	0	0	0
d__bacteria	p__desulfobacterota	c__thermodesulfobacteria	o__thermodesulfobacteriales	f__thermodesulfobacteriaceae	g__thermodesulfobacterium	s__Thermodesulfobacterium sp008630935	GCF_008630935.1	1	1	0	1	1
d__bacteria	p__desulfobacterota	c__thermodesulfobacteria	o__thermodesulfobacteriales	f__thermodesulfobacteriaceae	g__thermodesulfobacterium	s__Thermodesulfobacterium geofontis	GCF_000215975.1	1	1	0	1	1
d__bacteria	p__desulfobacterota	c__thermodesulfobacteria	o__thermodesulfobacteriales	f__thermodesulfobacteriaceae	g__thermodesulfobacterium	s__Thermodesulfobacterium commune	GCF_000734015.1	1	1	0	1	1
d__bacteria	p__desulfobacterota	c__thermodesulfobacteria	o__thermodesulfobacteriales	f__thermodesulfatatoraceae	g__thermodesulfatator	s__Thermodesulfatator indicus	GCF_000217795.1	2	2	0	2	1
d__bacteria	p__aquificota	c__aquificae	o__aquificales	f__aquificaceae	g__thermocrinis	s__Thermocrinis ruber	GCF_000512735.1	1	1	0	1	1
d__bacteria	p__aquificota	c__aquificae	o__aquificales	f__aquificaceae	g__thermocrinis	s__Thermocrinis albus	GCF_000025605.1	1	1	0	1	1
d__archaea	p__methanobacteriota_b	c__thermococci	o__thermococcales	f__thermococcaceae	g__thermococcus_b	s__Thermococcus_B paralvinellae	GCF_000517445.1	1	1	0	1	1
d__archaea	p__methanobacteriota_b	c__thermococci	o__thermococcales	f__thermococcaceae	g__thermococcus_b	s__Thermococcus_B barophilus	GCF_000151105.2	1	1	0	1	1
d__archaea	p__methanobacteriota_b	c__thermococci	o__thermococcales	f__thermococcaceae	g__thermococcus_a	s__Thermococcus_A sp001484685	GCF_001484685.1	1	1	0	1	1
d__archaea	p__methanobacteriota_b	c__thermococci	o__thermococcales	f__thermococcaceae	g__thermococcus_a	s__Thermococcus_A sibiricus	GCF_000022545.1	1	1	0	1	1
d__archaea	p__methanobacteriota_b	c__thermococci	o__thermococcales	f__thermococcaceae	g__thermococcus_a	s__Thermococcus_A litoralis	GCF_000246985.2	1	1	0	1	1
d__archaea	p__methanobacteriota_b	c__thermococci	o__thermococcales	f__thermococcaceae	g__thermococcus	s__Thermococcus thioreducens	GCF_002214545.1	1	1	0	1	1
d__archaea	p__methanobacteriota_b	c__thermococci	o__thermococcales	f__thermococcaceae	g__thermococcus	s__Thermococcus sp900198835	GCF_900198835.1	1	1	0	1	1
d__archaea	p__methanobacteriota_b	c__thermococci	o__thermococcales	f__thermococcaceae	g__thermococcus	s__Thermococcus sp002214525	GCF_002214525.1	1	1	0	1	1
d__archaea	p__methanobacteriota_b	c__thermococci	o__thermococcales	f__thermococcaceae	g__thermococcus	s__Thermococcus sp000221185	GCF_000221185.1	1	1	0	1	1
d__archaea	p__methanobacteriota_b	c__thermococci	o__thermococcales	f__thermococcaceae	g__thermococcus	s__Thermococcus sp000151205	GCF_000151205.2	1	1	0	1	1
d__archaea	p__methanobacteriota_b	c__thermococci	o__thermococcales	f__thermococcaceae	g__thermococcus	s__Thermococcus siculi	GCF_002214505.1	1	1	0	1	1
d__archaea	p__methanobacteriota_b	c__thermococci	o__thermococcales	f__thermococcaceae	g__thermococcus	s__Thermococcus radiotolerans	GCF_002214565.1	1	1	0	1	1
d__archaea	p__methanobacteriota_b	c__thermococci	o__thermococcales	f__thermococcaceae	g__thermococcus	s__Thermococcus profundus	GCF_002214585.1	1	1	0	1	1
d__archaea	p__methanobacteriota_b	c__thermococci	o__thermococcales	f__thermococcaceae	g__thermococcus	s__Thermococcus piezophilus	GCF_001647085.1	1	1	0	1	1
d__archaea	p__methanobacteriota_b	c__thermococci	o__thermococcales	f__thermococcaceae	g__thermococcus	s__Thermococcus peptonophilus	GCF_001592435.1	1	1	0	1	1
d__archaea	p__methanobacteriota_b	c__thermococci	o__thermococcales	f__thermococcaceae	g__thermococcus	s__Thermococcus pacificus	GCF_002214485.1	1	1	0	1	1
d__archaea	p__methanobacteriota_b	c__thermococci	o__thermococcales	f__thermococcaceae	g__thermococcus	s__Thermococcus onnurineus	GCF_000018365.1	1	1	0	1	1
d__archaea	p__methanobacteriota_b	c__thermococci	o__thermococcales	f__thermococcaceae	g__thermococcus	s__Thermococcus nautili	GCF_000585495.1	1	1	0	1	1
d__archaea	p__methanobacteriota_b	c__thermococci	o__thermococcales	f__thermococcaceae	g__thermococcus	s__Thermococcus kodakarensis	GCF_000009965.1	1	1	0	1	1
d__archaea	p__methanobacteriota_b	c__thermococci	o__thermococcales	f__thermococcaceae	g__thermococcus	s__Thermococcus indicus	GCF_006274605.1	1	1	0	1	1
d__archaea	p__methanobacteriota_b	c__thermococci	o__thermococcales	f__thermococcaceae	g__thermococcus	s__Thermococcus guaymasensis	GCF_000816105.1	1	1	0	1	1
d__archaea	p__methanobacteriota_b	c__thermococci	o__thermococcales	f__thermococcaceae	g__thermococcus	s__Thermococcus gorgonarius	GCF_002214385.1	1	1	0	1	1
d__archaea	p__methanobacteriota_b	c__thermococci	o__thermococcales	f__thermococcaceae	g__thermococcus	s__Thermococcus gammatolerans	GCF_000022365.1	1	1	0	1	1
d__archaea	p__methanobacteriota_b	c__thermococci	o__thermococcales	f__thermococcaceae	g__thermococcus	s__Thermococcus eurythermalis	GCF_000769655.1	1	1	0	1	1
d__archaea	p__methanobacteriota_b	c__thermococci	o__thermococcales	f__thermococcaceae	g__thermococcus	s__Thermococcus cleftensis	GCF_000265525.1	1	1	0	1	1
d__archaea	p__methanobacteriota_b	c__thermococci	o__thermococcales	f__thermococcaceae	g__thermococcus	s__Thermococcus celer	GCF_002214365.1	1	1	0	1	1
d__archaea	p__methanobacteriota_b	c__thermococci	o__thermococcales	f__thermococcaceae	g__thermococcus	s__Thermococcus camini	GCF_904067545.1	1	1	0	1	1
d__archaea	p__methanobacteriota_b	c__thermococci	o__thermococcales	f__thermococcaceae	g__thermococcus	s__Thermococcus barossii	GCF_002214465.1	1	1	0	1	1
d__bacteria	p__firmicutes_a	c__clostridia	o__acetivibrionales	f__dsm-8532	g__thermoclostridium	s__Thermoclostridium stercorarium	GCF_000331995.1	3	3	0	3	1
d__bacteria	p__proteobacteria	c__gammaproteobacteria	o__chromatiales	f__chromatiaceae	g__thermochromatium	s__Thermochromatium tepidum	GCF_009664085.1	3	3	0	3	1
d__bacteria	p__actinobacteriota	c__actinomycetia	o__streptosporangiales	f__streptosporangiaceae	g__thermobispora	s__Thermobispora bispora	GCF_000092645.1	3	3	0	3	3
d__bacteria	p__chloroflexota	c__chloroflexia	o__thermobaculales	f__thermobaculaceae	g__thermobaculum	s__Thermobaculum terrenum	GCF_000025005.1	2	2	0	2	1
d__bacteria	p__firmicutes_a	c__thermoanaerobacteria	o__thermoanaerobacterales	f__thermoanaerobacteraceae	g__thermoanaerobacterium	s__Thermoanaerobacterium xylanolyticum	GCF_000189775.2	1	1	0	1	1
d__bacteria	p__firmicutes_a	c__thermoanaerobacteria	o__thermoanaerobacterales	f__thermoanaerobacteraceae	g__thermoanaerobacterium	s__Thermoanaerobacterium thermosaccharolyticum	GCF_000145615.1	3	3	0	3	3
d__bacteria	p__firmicutes_a	c__thermoanaerobacteria	o__thermoanaerobacterales	f__thermoanaerobacteraceae	g__thermoanaerobacterium	s__Thermoanaerobacterium aotearoense	GCF_009905255.1	5	5	0	5	5
d__bacteria	p__firmicutes_a	c__thermoanaerobacteria	o__thermoanaerobacterales	f__thermoanaerobacteraceae	g__thermoanaerobacter	s__Thermoanaerobacter wiegelii	GCF_000147695.2	4	4	0	4	2
d__bacteria	p__firmicutes_a	c__thermoanaerobacteria	o__thermoanaerobacterales	f__thermoanaerobacteraceae	g__thermoanaerobacter	s__Thermoanaerobacter pseudethanolicus	GCF_000019085.1	4	4	0	4	2
d__bacteria	p__firmicutes_a	c__thermoanaerobacteria	o__thermoanaerobacterales	f__thermoanaerobacteraceae	g__thermoanaerobacter	s__Thermoanaerobacter kivui	GCF_000763575.1	4	4	0	4	2
d__bacteria	p__synergistota	c__synergistia	o__synergistales	f__synergistaceae	g__thermanaerovibrio	s__Thermanaerovibrio acidaminovorans	GCF_000024905.1	3	3	0	0	0
d__bacteria	p__firmicutes_e	c__thermaerobacteria	o__thermaerobacterales	f__thermaerobacteraceae	g__thermaerobacter	s__Thermaerobacter sp004634385	GCF_004634385.1	2	2	0	0	0
d__bacteria	p__firmicutes_e	c__thermaerobacteria	o__thermaerobacterales	f__thermaerobacteraceae	g__thermaerobacter	s__Thermaerobacter marianensis	GCF_000184705.1	2	2	0	0	0
d__bacteria	p__firmicutes_b	c__moorellia	o__thermacetogeniales	f__thermacetogeniaceae	g__thermacetogenium	s__Thermacetogenium phaeum	GCF_000305935.1	3	3	0	0	0
d__bacteria	p__proteobacteria	c__gammaproteobacteria	o__burkholderiales	f__rhodocyclaceae	g__thauera_a	s__Thauera_A hydrothermalis	GCF_003345255.1	3	3	0	3	1
d__bacteria	p__proteobacteria	c__gammaproteobacteria	o__burkholderiales	f__rhodocyclaceae	g__thauera	s__Thauera sp002354895	GCF_002354895.1	4	4	0	4	1
d__bacteria	p__proteobacteria	c__gammaproteobacteria	o__burkholderiales	f__rhodocyclaceae	g__thauera	s__Thauera humireducens	GCF_001051995.2	4	4	0	4	1
d__bacteria	p__proteobacteria	c__gammaproteobacteria	o__burkholderiales	f__rhodocyclaceae	g__thauera	s__Thauera chlorobenzoica	GCF_001922305.1	4	4	0	4	1
d__bacteria	p__proteobacteria	c__gammaproteobacteria	o__burkholderiales	f__rhodocyclaceae	g__thauera	s__Thauera aromatica	GCF_003030465.1	4	4	0	4	1
d__bacteria	p__proteobacteria	c__gammaproteobacteria	o__enterobacterales	f__alteromonadaceae	g__thalassotalea_a	s__Thalassotalea_A sp007197775	GCF_007197775.1	6	6	0	6	1
d__bacteria	p__proteobacteria	c__gammaproteobacteria	o__enterobacterales	f__alteromonadaceae	g__thalassotalea_a	s__Thalassotalea_A sp004752005	GCF_004752005.1	6	6	0	6	1
d__bacteria	p__proteobacteria	c__gammaproteobacteria	o__enterobacterales	f__alteromonadaceae	g__thalassotalea_a	s__Thalassotalea_A crassostreae	GCF_001831495.1	6	6	0	6	1
d__bacteria	p__proteobacteria	c__gammaproteobacteria	o__enterobacterales	f__alteromonadaceae	g__thalassotalea	s__Thalassotalea sp014898095	GCF_014898095.1	6	6	0	6	2
d__bacteria	p__proteobacteria	c__alphaproteobacteria	o__rhodospirillales	f__thalassospiraceae	g__thalassospira	s__Thalassospira xiamenensis	GCF_000300235.2	4	4	0	4	1
d__bacteria	p__proteobacteria	c__alphaproteobacteria	o__rhodospirillales	f__thalassospiraceae	g__thalassospira	s__Thalassospira marina	GCF_002844375.1	6	6	0	6	1
d__bacteria	p__proteobacteria	c__alphaproteobacteria	o__rhodospirillales	f__thalassospiraceae	g__thalassospira	s__Thalassospira indica	GCF_003403095.1	4	4	0	4	1
d__bacteria	p__proteobacteria	c__gammaproteobacteria	o__pseudomonadales	f__dsm-6294	g__thalassolituus	s__Thalassolituus oleivorans	GCF_000355675.1	4	4	0	4	2
d__bacteria	p__firmicutes	c__bacilli	o__lactobacillales	f__enterococcaceae	g__tetragenococcus	s__Tetragenococcus osmophilus	GCF_003795125.1	5	5	0	5	3
d__bacteria	p__firmicutes	c__bacilli	o__lactobacillales	f__enterococcaceae	g__tetragenococcus	s__Tetragenococcus koreensis	GCF_003795145.1	5	5	0	5	5
d__bacteria	p__acidobacteriota	c__acidobacteriae	o__acidobacteriales	f__acidobacteriaceae	g__terriglobus_a	s__Terriglobus_A albidus	GCF_008000815.1	1	1	0	1	1
d__bacteria	p__acidobacteriota	c__acidobacteriae	o__acidobacteriales	f__acidobacteriaceae	g__terriglobus	s__Terriglobus saanensis	GCF_000179915.2	1	1	0	1	1
d__bacteria	p__acidobacteriota	c__acidobacteriae	o__acidobacteriales	f__acidobacteriaceae	g__terriglobus	s__Terriglobus roseus	GCF_000265425.1	2	2	0	2	2
d__bacteria	p__proteobacteria	c__alphaproteobacteria	o__caulobacterales	f__th1-2	g__terricaulis	s__Terricaulis sp001679665	GCA_001679665.1	1	1	0	1	1
d__bacteria	p__proteobacteria	c__alphaproteobacteria	o__caulobacterales	f__th1-2	g__terricaulis	s__Terricaulis silvestris	GCF_009792355.1	1	1	0	1	1
d__bacteria	p__firmicutes	c__bacilli	o__bacillales_d	f__amphibacillaceae	g__terribacillus	s__Terribacillus aidingensis_A	GCF_019056395.1	8	8	0	8	6
d__bacteria	p__spirochaetota	c__spirochaetia	o__treponematales	f__termitinemataceae	g__termitinema	s__Termitinema primitia	GCF_000214375.1	2	2	0	2	1
d__bacteria	p__proteobacteria	c__gammaproteobacteria	o__pseudomonadales	f__cellvibrionaceae	g__teredinibacter	s__Teredinibacter turnerae_B	GCF_000023025.1	3	3	0	3	1
d__bacteria	p__proteobacteria	c__gammaproteobacteria	o__pseudomonadales	f__cellvibrionaceae	g__teredinibacter	s__Teredinibacter purpureus	GCF_014217335.1	2	2	0	1	1
d__bacteria	p__proteobacteria	c__gammaproteobacteria	o__pseudomonadales	f__cellvibrionaceae	g__teredinibacter	s__Teredinibacter haidensis	GCF_014211975.1	2	2	0	2	1
d__bacteria	p__proteobacteria	c__alphaproteobacteria	o__rhodospirillales	f__terasakiellaceae	g__terasakiella	s__Terasakiella sp004564135	GCF_004564135.1	3	3	0	3	1
d__bacteria	p__thermotogota	c__thermotogae	o__petrotogales	f__petrotogaceae	g__tepiditoga	s__Tepiditoga spiralis	GCF_014701195.1	6	6	0	6	1
d__bacteria	p__chloroflexota	c__dehalococcoidia	o__tepidiformales	f__tepidiformaceae	g__tepidiforma	s__Tepidiforma bonchosmolovskayae	GCF_008838325.1	1	1	0	1	1
d__bacteria	p__firmicutes_a	c__thermosediminibacteria	o__thermosediminibacterales	f__tepidanaerobacteraceae	g__tepidanaerobacter	s__Tepidanaerobacter acetatoxydans	GCF_000328765.2	2	2	0	0	0
d__bacteria	p__bacteroidota	c__bacteroidia	o__bacteroidales	f__tenuifilaceae	g__tenuifilum	s__Tenuifilum thalassicum	GCF_013265555.1	3	2	1	3	1
d__bacteria	p__bacteroidota	c__bacteroidia	o__flavobacteriales	f__flavobacteriaceae	g__tenacibaculum_a	s__Tenacibaculum_A todarodis	GCF_001889045.1	3	3	0	3	1
d__bacteria	p__bacteroidota	c__bacteroidia	o__flavobacteriales	f__flavobacteriaceae	g__tenacibaculum	s__Tenacibaculum maritimum	GCF_900119795.1	6	6	0	6	1
d__bacteria	p__bacteroidota	c__bacteroidia	o__flavobacteriales	f__flavobacteriaceae	g__tenacibaculum	s__Tenacibaculum jejuense	GCF_900198195.1	3	3	0	3	1
d__bacteria	p__planctomycetota	c__planctomycetia	o__gemmatales	f__gemmataceae	g__telmatocola	s__Telmatocola sphagniphila	GCF_018398935.1	1	1	0	1	1
d__bacteria	p__firmicutes_b	c__tc1				s__TC1 sp001584725	GCF_001584725.1	2	2	0	0	0
d__bacteria	p__proteobacteria	c__gammaproteobacteria	o__burkholderiales	f__burkholderiaceae	g__taylorella	s__Taylorella equigenitalis	GCF_000276685.1	3	3	0	3	1
d__bacteria	p__proteobacteria	c__gammaproteobacteria	o__enterobacterales	f__enterobacteriaceae	g__tatumella	s__Tatumella citrea	GCF_002163585.1	7	7	0	7	1
d__bacteria	p__proteobacteria	c__gammaproteobacteria	o__legionellales	f__legionellaceae	g__tatlockia	s__Tatlockia micdadei	GCF_000953635.1	3	3	0	3	1
d__bacteria	p__proteobacteria	c__gammaproteobacteria	o__legionellales	f__legionellaceae	g__tatlockia	s__Tatlockia lansingensis	GCF_900187355.1	4	4	0	4	1
d__bacteria	p__proteobacteria	c__gammaproteobacteria	o__legionellales	f__legionellaceae	g__tatlockia	s__Tatlockia jordanis	GCF_900637635.1	4	4	0	4	1
d__bacteria	p__proteobacteria	c__gammaproteobacteria	o__legionellales	f__legionellaceae	g__tatlockia	s__Tatlockia hackeliae	GCF_000953655.1	4	4	0	4	2
d__bacteria	p__proteobacteria	c__gammaproteobacteria	o__legionellales	f__legionellaceae	g__tatlockia	s__Tatlockia clemsonensis	GCF_002240035.1	4	4	0	4	2
d__bacteria	p__proteobacteria	c__alphaproteobacteria	o__rhodobacterales	f__rhodobacteraceae	g__tateyamaria	s__Tateyamaria omphalii_A	GCF_001969365.1	1	1	0	1	1
d__bacteria	p__proteobacteria	c__alphaproteobacteria	o__rhizobiales	f__xanthobacteraceae	g__tardiphaga	s__Tardiphaga sp018279705	GCF_018279705.1	2	2	0	2	2
d__bacteria	p__proteobacteria	c__alphaproteobacteria	o__sphingomonadales	f__sphingomonadaceae	g__tardibacter	s__Tardibacter chloracetimidivorans	GCF_001890385.1	2	2	0	2	1
d__bacteria	p__bacteroidota	c__bacteroidia	o__flavobacteriales	f__flavobacteriaceae	g__tamlana_a	s__Tamlana_A carrageenivorans	GCF_002893765.1	3	3	0	3	1
d__bacteria	p__proteobacteria	c__gammaproteobacteria	o__enterobacterales_a	f__enterobacteriaceae_a	g__tachikawaea	s__Tachikawaea gelatinosa	GCF_000828815.1	3	3	0	3	1
d__bacteria	p__proteobacteria	c__alphaproteobacteria	o__rhodobacterales	f__rhodobacteraceae	g__tabrizicola	s__Tabrizicola piscis	GCF_003940805.1	2	2	0	2	1
d__bacteria	p__desulfobacterota	c__desulfuromonadia	o__desulfuromonadales	f__szua-540		s__SZUA-540 sp009731355	GCF_009731355.2	2	2	0	2	1
d__bacteria	p__desulfobacterota	c__syntrophia	o__syntrophales	f__syntrophaceae	g__syntrophus	s__Syntrophus aciditrophicus	GCF_000013405.1	1	1	0	0	0
d__bacteria	p__desulfobacterota	c__desulfuromonadia	o__desulfuromonadales	f__syntrophotaleaceae	g__syntrophotalea_a	s__Syntrophotalea_A acetylenivorans	GCF_001887775.1	3	3	0	3	1
d__bacteria	p__desulfobacterota	c__desulfuromonadia	o__desulfuromonadales	f__syntrophotaleaceae	g__syntrophotalea	s__Syntrophotalea carbinolica	GCF_000012885.1	2	2	0	2	1
d__bacteria	p__desulfobacterota	c__desulfuromonadia	o__desulfuromonadales	f__syntrophotaleaceae	g__syntrophotalea	s__Syntrophotalea acetylenica	GCF_001888165.1	4	4	0	4	1
d__bacteria	p__firmicutes_b	c__syntrophomonadia	o__syntrophomonadales	f__syntrophomonadaceae	g__syntrophomonas	s__Syntrophomonas wolfei	GCF_000014725.1	3	3	0	0	0
d__bacteria	p__firmicutes_b	c__syntrophomonadia	o__syntrophomonadales	f__syntrophomonadaceae	g__syntrophocurvum	s__Syntrophocurvum alkaliphilum	GCF_009734445.1	3	3	0	0	0
d__bacteria	p__firmicutes_b	c__desulfitobacteriia	o__desulfitobacteriales	f__syntrophobotulaceae	g__syntrophobotulus	s__Syntrophobotulus glycolicus	GCF_000190635.1	4	4	0	4	1
d__bacteria	p__desulfobacterota	c__syntrophobacteria	o__syntrophobacterales	f__syntrophobacteraceae	g__syntrophobacter	s__Syntrophobacter fumaroxidans	GCF_000014965.1	2	2	0	0	0
d__bacteria	p__cyanobacteria	c__cyanobacteriia	o__cyanobacteriales	f__microcystaceae_a	g__synechocystis	s__Synechocystis sp018282115	GCF_018282115.1	2	2	0	2	1
d__bacteria	p__cyanobacteria	c__cyanobacteriia	o__cyanobacteriales	f__microcystaceae_a	g__synechocystis	s__Synechocystis sp000478825	GCF_000478825.2	2	2	0	2	1
d__bacteria	p__cyanobacteria	c__cyanobacteriia	o__cyanobacteriales	f__microcystaceae_a	g__synechocystis	s__Synechocystis sp000284455	GCF_000284455.1	2	2	0	2	1
d__bacteria	p__cyanobacteria	c__cyanobacteriia	o__pcc-6307	f__cyanobiaceae	g__synechococcus_e	s__Synechococcus_E sp014279755	GCF_014279755.1	2	2	0	2	1
d__bacteria	p__cyanobacteria	c__cyanobacteriia	o__pcc-6307	f__cyanobiaceae	g__synechococcus_e	s__Synechococcus_E sp002724845	GCF_014279895.1	2	2	0	2	1
d__bacteria	p__cyanobacteria	c__cyanobacteriia	o__pcc-6307	f__cyanobiaceae	g__synechococcus_e	s__Synechococcus_E sp000737595	GCF_000737595.1	3	3	0	3	1
d__bacteria	p__cyanobacteria	c__cyanobacteriia	o__pcc-6307	f__cyanobiaceae	g__synechococcus_e	s__Synechococcus_E sp000737575	GCF_000737575.1	2	2	0	2	1
d__bacteria	p__cyanobacteria	c__cyanobacteriia	o__pcc-6307	f__cyanobiaceae	g__synechococcus_e	s__Synechococcus_E sp000737535	GCF_000737535.1	1	1	0	1	1
d__bacteria	p__cyanobacteria	c__cyanobacteriia	o__pcc-6307	f__cyanobiaceae	g__synechococcus_e	s__Synechococcus_E sp000195975	GCF_000195975.1	2	2	0	2	1
d__bacteria	p__cyanobacteria	c__cyanobacteriia	o__pcc-6307	f__cyanobiaceae	g__synechococcus_e	s__Synechococcus_E sp000161795	GCF_000161795.2	2	2	0	2	1
d__bacteria	p__cyanobacteria	c__cyanobacteriia	o__pcc-6307	f__cyanobiaceae	g__synechococcus_e	s__Synechococcus_E sp000012625	GCF_000012625.1	2	2	0	2	1
d__bacteria	p__cyanobacteria	c__cyanobacteriia	o__pcc-6307	f__cyanobiaceae	g__synechococcus_e	s__Synechococcus_E sp000012505	GCF_000012505.1	2	2	0	2	1
d__bacteria	p__cyanobacteria	c__cyanobacteriia	o__pcc-6307	f__cyanobiaceae	g__synechococcus_c	s__Synechococcus_C sp014279975	GCF_014279975.1	2	2	0	2	1
d__bacteria	p__cyanobacteria	c__cyanobacteriia	o__pcc-6307	f__cyanobiaceae	g__synechococcus_c	s__Synechococcus_C sp014279835	GCF_014279835.1	2	2	0	2	1
d__bacteria	p__cyanobacteria	c__cyanobacteriia	o__pcc-6307	f__cyanobiaceae	g__synechococcus_c	s__Synechococcus_C sp014279815	GCF_014279815.1	2	2	0	2	1
d__bacteria	p__cyanobacteria	c__cyanobacteriia	o__pcc-6307	f__cyanobiaceae	g__synechococcus_c	s__Synechococcus_C sp014279795	GCF_014279795.1	2	2	0	2	1
d__bacteria	p__cyanobacteria	c__cyanobacteriia	o__pcc-6307	f__cyanobiaceae	g__synechococcus_c	s__Synechococcus_C sp004209775	GCF_004209775.1	2	2	0	2	1
d__bacteria	p__cyanobacteria	c__cyanobacteriia	o__pcc-6307	f__cyanobiaceae	g__synechococcus_c	s__Synechococcus_C sp002693285	GCF_014280035.1	2	2	0	2	1
d__bacteria	p__cyanobacteria	c__cyanobacteriia	o__pcc-6307	f__cyanobiaceae	g__synechococcus_c	s__Synechococcus_C sp002500205	GCF_014279775.1	2	2	0	2	1
d__bacteria	p__cyanobacteria	c__cyanobacteriia	o__pcc-6307	f__cyanobiaceae	g__synechococcus_c	s__Synechococcus_C sp002172935	GCF_014279875.1	2	2	0	2	1
d__bacteria	p__cyanobacteria	c__cyanobacteriia	o__pcc-6307	f__cyanobiaceae	g__synechococcus_c	s__Synechococcus_C sp001632165	GCF_014304815.1	2	2	0	2	1
d__bacteria	p__cyanobacteria	c__cyanobacteriia	o__pcc-6307	f__cyanobiaceae	g__synechococcus_c	s__Synechococcus_C sp000153065	GCF_014279595.1	2	2	0	2	1
d__bacteria	p__cyanobacteria	c__cyanobacteriia	o__pcc-6307	f__cyanobiaceae	g__synechococcus_c	s__Synechococcus_C sp000014585	GCF_000014585.1	2	2	0	2	1
d__bacteria	p__cyanobacteria	c__cyanobacteriia	o__thermosynechococcales	f__thermosynechococcaceae	g__synechococcus_a	s__Synechococcus_A lividus	GCF_002754935.1	1	1	0	1	1
d__bacteria	p__cyanobacteria	c__cyanobacteriia	o__synechococcales	f__synechococcaceae	g__synechococcus	s__Synechococcus elongatus	GCF_000010065.1	2	2	0	2	1
d__bacteria	p__planctomycetota	c__planctomycetia	o__planctomycetales	f__mal52	g__symmachiella	s__Symmachiella dynata	GCF_007747995.1	1	1	0	1	1
d__bacteria	p__firmicutes_e	c__symbiobacteriia	o__symbiobacteriales	f__symbiobacteriaceae	g__symbiobacterium	s__Symbiobacterium thermophilum	GCF_000009905.1	6	6	0	0	0
d__bacteria	p__proteobacteria	c__gammaproteobacteria	o__burkholderiales	f__burkholderiaceae	g__symbiobacter	s__Symbiobacter mobilis	GCF_000477435.1	2	2	0	2	1
d__bacteria	p__firmicutes_a	c__clostridia	o__peptostreptococcales	f__thermotaleaceae	g__sy095	s__SY095 sp008152325	GCF_008152325.1	11	11	0	11	7
d__bacteria	p__proteobacteria	c__alphaproteobacteria	o__acetobacterales	f__acetobacteraceae	g__swingsia	s__Swingsia samuiensis	GCF_006542355.1	6	6	0	6	1
d__bacteria	p__proteobacteria	c__alphaproteobacteria	o__rhodobacterales	f__rhodobacteraceae	g__sw4	s__SW4 sp002732825	GCF_008065155.1	1	1	0	1	1
d__bacteria	p__proteobacteria	c__gammaproteobacteria	o__burkholderiales	f__burkholderiaceae	g__sutterella	s__Sutterella megalosphaeroides	GCF_003609995.1	8	8	0	8	1
d__bacteria	p__proteobacteria	c__gammaproteobacteria	o__burkholderiales	f__burkholderiaceae	g__sutterella	s__Sutterella faecalis	GCF_006337085.1	6	6	0	6	1
d__bacteria	p__firmicutes	c__bacilli	o__bacillales	f__bacillaceae_i	g__sutcliffiella_a	s__Sutcliffiella_A sp009363695	GCF_009363695.1	9	9	0	9	7
d__bacteria	p__firmicutes	c__bacilli	o__bacillales	f__bacillaceae_i	g__sutcliffiella_a	s__Sutcliffiella_A horikoshii_C	GCF_002157855.1	8	8	0	8	6
d__bacteria	p__firmicutes	c__bacilli	o__bacillales	f__bacillaceae_i	g__sutcliffiella	s__Sutcliffiella cohnii	GCF_002250055.1	14	14	0	14	3
d__bacteria	p__campylobacterota	c__campylobacteria	o__campylobacterales	f__sulfurovaceae	g__sulfurovum	s__Sulfurovum sp000010345	GCF_000010345.1	3	3	0	3	1
d__bacteria	p__campylobacterota	c__campylobacteria	o__campylobacterales	f__sulfurovaceae	g__sulfurovum	s__Sulfurovum lithotrophicum	GCF_000987835.1	3	3	0	3	1
d__bacteria	p__campylobacterota	c__campylobacteria	o__campylobacterales	f__sulfurovaceae	g__sulfurovum	s__Sulfurovum indicum	GCF_014931715.1	3	3	0	3	1
d__bacteria	p__campylobacterota	c__campylobacteria	o__campylobacterales	f__sulfurospirillaceae	g__sulfurospirillum	s__Sulfurospirillum sp002309535	GCF_002309535.1	3	3	0	3	1
d__bacteria	p__campylobacterota	c__campylobacteria	o__campylobacterales	f__sulfurospirillaceae	g__sulfurospirillum	s__Sulfurospirillum sp002162315	GCF_002162315.1	3	3	0	3	2
d__bacteria	p__campylobacterota	c__campylobacteria	o__campylobacterales	f__sulfurospirillaceae	g__sulfurospirillum	s__Sulfurospirillum sp001548035	GCF_001548035.1	4	4	0	4	4
d__bacteria	p__campylobacterota	c__campylobacteria	o__campylobacterales	f__sulfurospirillaceae	g__sulfurospirillum	s__Sulfurospirillum multivorans	GCF_000568815.1	2	2	0	2	2
d__bacteria	p__campylobacterota	c__campylobacteria	o__campylobacterales	f__sulfurospirillaceae	g__sulfurospirillum	s__Sulfurospirillum halorespirans	GCF_001723605.1	2	2	0	2	1
d__bacteria	p__campylobacterota	c__campylobacteria	o__campylobacterales	f__sulfurospirillaceae	g__sulfurospirillum	s__Sulfurospirillum deleyianum	GCF_000024885.1	3	3	0	3	1
d__bacteria	p__campylobacterota	c__campylobacteria	o__campylobacterales	f__sulfurospirillaceae	g__sulfurospirillum	s__Sulfurospirillum cavolei	GCF_001548055.1	3	3	0	3	2
d__bacteria	p__campylobacterota	c__campylobacteria	o__campylobacterales	f__sulfurospirillaceae	g__sulfurospirillum	s__Sulfurospirillum barnesii	GCF_000265295.1	2	2	0	2	1
d__bacteria	p__proteobacteria	c__gammaproteobacteria	o__thiohalomonadales	f__thiohalomonadaceae	g__sulfurivermis	s__Sulfurivermis fontis	GCF_004001245.1	2	2	0	2	1
d__bacteria	p__proteobacteria	c__gammaproteobacteria	o__burkholderiales	f__thiobacillaceae	g__sulfuritortus	s__Sulfuritortus calidifontis	GCF_003967275.1	2	2	0	2	2
d__bacteria	p__proteobacteria	c__gammaproteobacteria	o__burkholderiales	f__rhodocyclaceae	g__sulfuritalea	s__Sulfuritalea hydrogenivorans	GCF_000828635.1	2	2	0	2	1
d__archaea	p__thermoproteota	c__thermoproteia	o__sulfolobales	f__sulfolobaceae	g__sulfurisphaera	s__Sulfurisphaera tokodaii	GCF_000011205.1	1	1	0	1	1
d__archaea	p__thermoproteota	c__thermoproteia	o__sulfolobales	f__sulfolobaceae	g__sulfurisphaera	s__Sulfurisphaera ohwakuensis	GCF_009729055.1	1	1	0	1	1
d__bacteria	p__campylobacterota	c__campylobacteria	o__campylobacterales	f__sulfurimonadaceae	g__sulfurimonas	s__Sulfurimonas sp017357825	GCF_017357825.1	4	4	0	4	2
d__bacteria	p__campylobacterota	c__campylobacteria	o__campylobacterales	f__sulfurimonadaceae	g__sulfurimonas	s__Sulfurimonas sp014905095	GCF_014905095.1	4	4	0	4	1
d__bacteria	p__campylobacterota	c__campylobacteria	o__campylobacterales	f__sulfurimonadaceae	g__sulfurimonas	s__Sulfurimonas sp009258225	GCF_009258225.1	4	4	0	4	2
d__bacteria	p__campylobacterota	c__campylobacteria	o__campylobacterales	f__sulfurimonadaceae	g__sulfurimonas	s__Sulfurimonas sp009068765	GCF_009068765.1	4	4	0	4	1
d__bacteria	p__campylobacterota	c__campylobacteria	o__campylobacterales	f__sulfurimonadaceae	g__sulfurimonas	s__Sulfurimonas sp002452895	GCF_009883775.1	4	4	0	4	1
d__bacteria	p__campylobacterota	c__campylobacteria	o__campylobacterales	f__sulfurimonadaceae	g__sulfurimonas	s__Sulfurimonas sediminis	GCF_014905115.1	4	4	0	4	1
d__bacteria	p__campylobacterota	c__campylobacteria	o__campylobacterales	f__sulfurimonadaceae	g__sulfurimonas	s__Sulfurimonas paralvinellae	GCF_014905135.1	4	4	0	4	2
d__bacteria	p__campylobacterota	c__campylobacteria	o__campylobacterales	f__sulfurimonadaceae	g__sulfurimonas	s__Sulfurimonas marisnigri	GCF_015265475.1	4	4	0	4	1
d__bacteria	p__campylobacterota	c__campylobacteria	o__campylobacterales	f__sulfurimonadaceae	g__sulfurimonas	s__Sulfurimonas denitrificans	GCF_000012965.1	4	4	0	4	1
d__bacteria	p__campylobacterota	c__campylobacteria	o__campylobacterales	f__sulfurimonadaceae	g__sulfurimonas	s__Sulfurimonas baltica	GCF_015265455.1	4	4	0	4	1
d__bacteria	p__campylobacterota	c__campylobacteria	o__campylobacterales	f__sulfurimonadaceae	g__sulfurimonas	s__Sulfurimonas autotrophica	GCF_000147355.1	4	4	0	4	1
d__bacteria	p__proteobacteria	c__gammaproteobacteria	o__burkholderiales	f__sulfuricellaceae	g__sulfurimicrobium	s__Sulfurimicrobium lacus	GCF_011764585.1	2	2	0	2	1
d__bacteria	p__aquificota	c__aquificae	o__hydrogenothermales	f__hydrogenothermaceae	g__sulfurihydrogenibium	s__Sulfurihydrogenibium azorense	GCF_000021545.1	2	2	0	2	1
d__bacteria	p__proteobacteria	c__gammaproteobacteria	o__acidiferrobacterales	f__sulfurifustaceae	g__sulfurifustis	s__Sulfurifustis variabilis	GCF_002355415.1	1	1	0	1	1
d__bacteria	p__proteobacteria	c__gammaproteobacteria	o__aks1		g__sulfuriflexus	s__Sulfuriflexus mobilis	GCF_003967195.1	1	1	0	1	1
d__bacteria	p__proteobacteria	c__gammaproteobacteria	o__burkholderiales	f__sulfuriferulaceae	g__sulfuriferula_a	s__Sulfuriferula_A sp002162035	GCF_002162035.1	2	2	0	2	1
d__bacteria	p__proteobacteria	c__gammaproteobacteria	o__burkholderiales	f__sulfuriferulaceae	g__sulfuriferula_a	s__Sulfuriferula_A nivalis	GCF_009937995.1	3	3	0	3	1
d__bacteria	p__proteobacteria	c__gammaproteobacteria	o__burkholderiales	f__sulfuriferulaceae	g__sulfuriferula	s__Sulfuriferula plumbiphila	GCF_009938015.1	2	2	0	2	1
d__bacteria	p__campylobacterota	c__campylobacteria	o__campylobacterales	f__sulfurimonadaceae	g__sulfuricurvum	s__Sulfuricurvum kujiense	GCF_000183725.1	3	3	0	3	1
d__bacteria	p__proteobacteria	c__gammaproteobacteria	o__burkholderiales	f__sulfuricellaceae	g__sulfuricella	s__Sulfuricella denitrificans	GCF_000297055.2	2	2	0	2	1
d__bacteria	p__proteobacteria	c__gammaproteobacteria	o__acidiferrobacterales	f__sulfurifustaceae	g__sulfuricaulis	s__Sulfuricaulis limicola	GCF_002355735.1	1	1	0	1	1
d__archaea	p__thermoproteota	c__thermoproteia	o__sulfolobales	f__sulfolobaceae	g__sulfuracidifex	s__Sulfuracidifex tepidarius	GCF_008326425.1	1	1	0	1	1
d__archaea	p__thermoproteota	c__thermoproteia	o__sulfolobales	f__sulfolobaceae	g__sulfolobus	s__Sulfolobus acidocaldarius	GCF_000012285.1	1	1	0	1	1
d__archaea	p__thermoproteota	c__thermoproteia	o__sulfolobales	f__sulfolobaceae	g__sulfodiicoccus	s__Sulfodiicoccus acidiphilus	GCF_003967175.1	1	1	0	1	1
d__bacteria	p__proteobacteria	c__alphaproteobacteria	o__rhodobacterales	f__rhodobacteraceae	g__sulfitobacter	s__Sulfitobacter sp018200035	GCF_018200035.1	2	2	0	2	2
d__bacteria	p__proteobacteria	c__alphaproteobacteria	o__rhodobacterales	f__rhodobacteraceae	g__sulfitobacter	s__Sulfitobacter sp009363555	GCF_009363555.1	2	2	0	2	1
d__bacteria	p__proteobacteria	c__alphaproteobacteria	o__rhodobacterales	f__rhodobacteraceae	g__sulfitobacter	s__Sulfitobacter sp006064855	GCF_006064855.1	2	2	0	2	1
d__bacteria	p__proteobacteria	c__alphaproteobacteria	o__rhodobacterales	f__rhodobacteraceae	g__sulfitobacter	s__Sulfitobacter sp003352085	GCF_003352085.1	1	1	0	1	1
d__bacteria	p__proteobacteria	c__alphaproteobacteria	o__rhodobacterales	f__rhodobacteraceae	g__sulfitobacter	s__Sulfitobacter sp003352065	GCF_003352065.1	1	1	0	1	1
d__bacteria	p__proteobacteria	c__alphaproteobacteria	o__rhodobacterales	f__rhodobacteraceae	g__sulfitobacter	s__Sulfitobacter sp001634775	GCF_003611275.1	4	4	0	4	1
d__bacteria	p__proteobacteria	c__alphaproteobacteria	o__rhodobacterales	f__rhodobacteraceae	g__sulfitobacter	s__Sulfitobacter mediterraneus_A	GCF_016801775.1	2	2	0	2	1
d__bacteria	p__proteobacteria	c__alphaproteobacteria	o__rhodobacterales	f__rhodobacteraceae	g__sulfitobacter	s__Sulfitobacter alexandrii	GCF_001886735.1	2	2	0	2	1
d__bacteria	p__bacteroidota	c__bacteroidia	o__flavobacteriales	f__blattabacteriaceae	g__sulcia	s__Sulcia muelleri_A	GCF_000829155.1	1	1	0	1	1
d__bacteria	p__bacteroidota	c__bacteroidia	o__flavobacteriales	f__blattabacteriaceae	g__sulcia	s__Sulcia muelleri	GCF_003214255.1	1	1	0	1	1
d__bacteria	p__firmicutes	c__bacilli	o__lactobacillales	f__aerococcaceae	g__suicoccus	s__Suicoccus acidiformans	GCF_003546865.1	4	4	0	4	1
d__bacteria	p__proteobacteria	c__gammaproteobacteria	o__enterobacterales	f__succinivibrionaceae	g__succinivibrio	s__Succinivibrio dextrinosolvens_A	GCF_011065405.1	7	7	0	7	1
d__bacteria	p__actinobacteriota	c__actinomycetia	o__actinomycetales	f__microbacteriaceae	g__subtercola	s__Subtercola sp018889995	GCF_018889995.1	2	2	0	2	2
d__archaea	p__thermoproteota	c__thermoproteia	o__sulfolobales	f__sulfolobaceae	g__stygiolobus	s__Stygiolobus azoricus	GCF_009729035.1	1	1	0	1	1
d__bacteria	p__actinobacteriota	c__actinomycetia	o__streptosporangiales	f__streptosporangiaceae	g__streptosporangium	s__Streptosporangium roseum	GCF_000024865.1	6	6	0	6	1
d__bacteria	p__actinobacteriota	c__actinomycetia	o__streptomycetales	f__streptomycetaceae	g__streptomyces_d	s__Streptomyces_D bronchialis	GCF_003258605.2	8	8	0	8	1
d__bacteria	p__actinobacteriota	c__actinomycetia	o__streptomycetales	f__streptomycetaceae	g__streptomyces	s__Streptomyces yunnanensis	GCF_016917755.1	7	7	0	7	1
d__bacteria	p__actinobacteriota	c__actinomycetia	o__streptomycetales	f__streptomycetaceae	g__streptomyces	s__Streptomyces yatensis	GCF_018069625.1	6	6	0	6	2
d__bacteria	p__actinobacteriota	c__actinomycetia	o__streptomycetales	f__streptomycetaceae	g__streptomyces	s__Streptomyces xinghaiensis	GCF_000220705.2	6	6	0	6	2
d__bacteria	p__actinobacteriota	c__actinomycetia	o__streptomycetales	f__streptomycetaceae	g__streptomyces	s__Streptomyces xiamenensis	GCF_000993785.3	5	5	0	5	1
d__bacteria	p__actinobacteriota	c__actinomycetia	o__streptomycetales	f__streptomycetaceae	g__streptomyces	s__Streptomyces viridosporus	GCF_008704515.1	6	6	0	6	2
d__bacteria	p__actinobacteriota	c__actinomycetia	o__streptomycetales	f__streptomycetaceae	g__streptomyces	s__Streptomyces violaceusniger_A	GCF_000147815.2	6	6	0	6	2
d__bacteria	p__actinobacteriota	c__actinomycetia	o__streptomycetales	f__streptomycetaceae	g__streptomyces	s__Streptomyces vinaceus	GCF_008704935.1	7	7	0	7	1
d__bacteria	p__actinobacteriota	c__actinomycetia	o__streptomycetales	f__streptomycetaceae	g__streptomyces	s__Streptomyces vietnamensis	GCF_000830005.1	7	7	0	7	1
d__bacteria	p__actinobacteriota	c__actinomycetia	o__streptomycetales	f__streptomycetaceae	g__streptomyces	s__Streptomyces venezuelae_F	GCF_008642335.1	6	6	0	6	3
d__bacteria	p__actinobacteriota	c__actinomycetia	o__streptomycetales	f__streptomycetaceae	g__streptomyces	s__Streptomyces venezuelae_E	GCF_008642275.1	7	7	0	7	1
d__bacteria	p__actinobacteriota	c__actinomycetia	o__streptomycetales	f__streptomycetaceae	g__streptomyces	s__Streptomyces venezuelae_D	GCF_008642315.1	6	6	0	6	3
d__bacteria	p__actinobacteriota	c__actinomycetia	o__streptomycetales	f__streptomycetaceae	g__streptomyces	s__Streptomyces venezuelae_C	GCF_008642295.1	6	6	0	6	1
d__bacteria	p__actinobacteriota	c__actinomycetia	o__streptomycetales	f__streptomycetaceae	g__streptomyces	s__Streptomyces venezuelae_B	GCF_008642355.1	6	6	0	6	3
d__bacteria	p__actinobacteriota	c__actinomycetia	o__streptomycetales	f__streptomycetaceae	g__streptomyces	s__Streptomyces venezuelae	GCF_008639165.1	7	7	0	7	1
d__bacteria	p__actinobacteriota	c__actinomycetia	o__streptomycetales	f__streptomycetaceae	g__streptomyces	s__Streptomyces tsukubensis_B	GCF_009296025.1	6	6	0	6	1
d__bacteria	p__actinobacteriota	c__actinomycetia	o__streptomycetales	f__streptomycetaceae	g__streptomyces	s__Streptomyces tsukubensis	GCF_003932715.1	6	6	0	6	3
d__bacteria	p__actinobacteriota	c__actinomycetia	o__streptomycetales	f__streptomycetaceae	g__streptomyces	s__Streptomyces tirandamycinicus	GCF_003097515.1	5	5	0	5	1
d__bacteria	p__actinobacteriota	c__actinomycetia	o__streptomycetales	f__streptomycetaceae	g__streptomyces	s__Streptomyces sviceus	GCF_003443735.1	6	6	0	6	1
d__bacteria	p__actinobacteriota	c__actinomycetia	o__streptomycetales	f__streptomycetaceae	g__streptomyces	s__Streptomyces subrutilus	GCF_008704535.1	7	7	0	7	1
[truncated: 4,178 more rows]

## Sheet: 16S LTs
Domain	Species	Genome Accession	Operon Number	Shuffling Method: Z Score	Shuffling Method: μ Biological	Shuffling Method: μ Shuffled	Shuffling Method: σ Shuffled	Covariation Method: Structure Cluster ID	Covariation Method: LT Covariation	Covariation Method: Number of Sliding Windows
[truncated: 18,040 more rows]

[truncated: 1 more sheets: 23S LTs]
